# Supplementary material for: In heart failure reactivation of RNA-binding proteins drives the transcriptome into a fetal state
Source: bioRxiv preprint, doi:10.1101/2021.04.30.442191, version 1 (2021-05-01)
Supplement: Table S6 [file 442191_file09.csv]

Tissue 1	Tissue 2	Gene set collection	Gene set	Gene set URL	Genes in gene set (N)	Enrichment (Fisher's exact test)	P-value (Fisher's exact test)	FDR (Benjamini-Hochberg)
Heart	Arteria	c2.cp.biocarta	BIOCARTA_RELA_PATHWAY	http://www.gsea-msigdb.org/gsea/msigdb/cards/BIOCARTA_RELA_PATHWAY	13	0	1	1
iPSC-CVPC	Heart	c2.cp.biocarta	BIOCARTA_SRCRPTP_PATHWAY	http://www.gsea-msigdb.org/gsea/msigdb/cards/BIOCARTA_SRCRPTP_PATHWAY	6	0	1	1
iPSC-CVPC	Heart	c2.cp.biocarta	BIOCARTA_GRANULOCYTES_PATHWAY	http://www.gsea-msigdb.org/gsea/msigdb/cards/BIOCARTA_GRANULOCYTES_PATHWAY	9	0	1	1
iPSC-CVPC	Arteria	c2.cp.biocarta	BIOCARTA_GRANULOCYTES_PATHWAY	http://www.gsea-msigdb.org/gsea/msigdb/cards/BIOCARTA_GRANULOCYTES_PATHWAY	9	2.14962403857217	0.399093657395531	1
iPSC-CVPC	Heart	c2.cp.biocarta	BIOCARTA_ASBCELL_PATHWAY	http://www.gsea-msigdb.org/gsea/msigdb/cards/BIOCARTA_ASBCELL_PATHWAY	3	0	1	1
iPSC-CVPC	Arteria	c2.cp.biocarta	BIOCARTA_ASBCELL_PATHWAY	http://www.gsea-msigdb.org/gsea/msigdb/cards/BIOCARTA_ASBCELL_PATHWAY	3	0	1	1
Heart	Arteria	c2.cp.biocarta	BIOCARTA_ASBCELL_PATHWAY	http://www.gsea-msigdb.org/gsea/msigdb/cards/BIOCARTA_ASBCELL_PATHWAY	3	0	1	1
iPSC-CVPC	Arteria	c2.cp.biocarta	BIOCARTA_AGPCR_PATHWAY	http://www.gsea-msigdb.org/gsea/msigdb/cards/BIOCARTA_AGPCR_PATHWAY	6	0	1	1
iPSC-CVPC	Heart	c2.cp.biocarta	BIOCARTA_BLYMPHOCYTE_PATHWAY	http://www.gsea-msigdb.org/gsea/msigdb/cards/BIOCARTA_BLYMPHOCYTE_PATHWAY	4	0	1	1
iPSC-CVPC	Arteria	c2.cp.biocarta	BIOCARTA_BLYMPHOCYTE_PATHWAY	http://www.gsea-msigdb.org/gsea/msigdb/cards/BIOCARTA_BLYMPHOCYTE_PATHWAY	4	0	1	1
Heart	Arteria	c2.cp.biocarta	BIOCARTA_BLYMPHOCYTE_PATHWAY	http://www.gsea-msigdb.org/gsea/msigdb/cards/BIOCARTA_BLYMPHOCYTE_PATHWAY	4	0	1	1
iPSC-CVPC	Heart	c2.cp.biocarta	BIOCARTA_MCM_PATHWAY	http://www.gsea-msigdb.org/gsea/msigdb/cards/BIOCARTA_MCM_PATHWAY	11	0	1	1
iPSC-CVPC	Arteria	c2.cp.biocarta	BIOCARTA_MCM_PATHWAY	http://www.gsea-msigdb.org/gsea/msigdb/cards/BIOCARTA_MCM_PATHWAY	11	1.71933654701835	0.463429663316942	1
iPSC-CVPC	Heart	c2.cp.biocarta	BIOCARTA_G1_PATHWAY	http://www.gsea-msigdb.org/gsea/msigdb/cards/BIOCARTA_G1_PATHWAY	21	0	1	1
iPSC-CVPC	Arteria	c2.cp.biocarta	BIOCARTA_G1_PATHWAY	http://www.gsea-msigdb.org/gsea/msigdb/cards/BIOCARTA_G1_PATHWAY	21	0	0.627107167617553	1
iPSC-CVPC	Heart	c2.cp.biocarta	BIOCARTA_G2_PATHWAY	http://www.gsea-msigdb.org/gsea/msigdb/cards/BIOCARTA_G2_PATHWAY	16	1.92888173685684	0.419999940957385	1
iPSC-CVPC	Arteria	c2.cp.biocarta	BIOCARTA_LAIR_PATHWAY	http://www.gsea-msigdb.org/gsea/msigdb/cards/BIOCARTA_LAIR_PATHWAY	11	0	1	1
iPSC-CVPC	Heart	c2.cp.biocarta	BIOCARTA_CLASSIC_PATHWAY	http://www.gsea-msigdb.org/gsea/msigdb/cards/BIOCARTA_CLASSIC_PATHWAY	12	0	1	1
iPSC-CVPC	Arteria	c2.cp.biocarta	BIOCARTA_CLASSIC_PATHWAY	http://www.gsea-msigdb.org/gsea/msigdb/cards/BIOCARTA_CLASSIC_PATHWAY	12	3.44407057775882	0.138477997216538	1
iPSC-CVPC	Heart	c2.cp.biocarta	BIOCARTA_COMP_PATHWAY	http://www.gsea-msigdb.org/gsea/msigdb/cards/BIOCARTA_COMP_PATHWAY	15	0	1	1
iPSC-CVPC	Arteria	c2.cp.biocarta	BIOCARTA_COMP_PATHWAY	http://www.gsea-msigdb.org/gsea/msigdb/cards/BIOCARTA_COMP_PATHWAY	15	2.64851901897544	0.198220067025792	1
iPSC-CVPC	Heart	c2.cp.biocarta	BIOCARTA_VDR_PATHWAY	http://www.gsea-msigdb.org/gsea/msigdb/cards/BIOCARTA_VDR_PATHWAY	21	1.44598311363395	0.510868982714056	1
iPSC-CVPC	Heart	c2.cp.biocarta	BIOCARTA_CTL_PATHWAY	http://www.gsea-msigdb.org/gsea/msigdb/cards/BIOCARTA_CTL_PATHWAY	3	0	1	1
iPSC-CVPC	Arteria	c2.cp.biocarta	BIOCARTA_CTL_PATHWAY	http://www.gsea-msigdb.org/gsea/msigdb/cards/BIOCARTA_CTL_PATHWAY	3	0	1	1
Heart	Arteria	c2.cp.biocarta	BIOCARTA_CTL_PATHWAY	http://www.gsea-msigdb.org/gsea/msigdb/cards/BIOCARTA_CTL_PATHWAY	3	0	1	1
iPSC-CVPC	Heart	c2.cp.biocarta	BIOCARTA_CELLCYCLE_PATHWAY	http://www.gsea-msigdb.org/gsea/msigdb/cards/BIOCARTA_CELLCYCLE_PATHWAY	15	0	1	1
iPSC-CVPC	Arteria	c2.cp.biocarta	BIOCARTA_CFTR_PATHWAY	http://www.gsea-msigdb.org/gsea/msigdb/cards/BIOCARTA_CFTR_PATHWAY	5	0	1	1
Heart	Arteria	c2.cp.biocarta	BIOCARTA_CFTR_PATHWAY	http://www.gsea-msigdb.org/gsea/msigdb/cards/BIOCARTA_CFTR_PATHWAY	5	0	1	1
iPSC-CVPC	Arteria	c2.cp.biocarta	BIOCARTA_CYTOKINE_PATHWAY	http://www.gsea-msigdb.org/gsea/msigdb/cards/BIOCARTA_CYTOKINE_PATHWAY	7	0	1	1
iPSC-CVPC	Heart	c2.cp.biocarta	BIOCARTA_INFLAM_PATHWAY	http://www.gsea-msigdb.org/gsea/msigdb/cards/BIOCARTA_INFLAM_PATHWAY	9	3.61846596404125	0.263839188119187	1
iPSC-CVPC	Arteria	c2.cp.biocarta	BIOCARTA_INFLAM_PATHWAY	http://www.gsea-msigdb.org/gsea/msigdb/cards/BIOCARTA_INFLAM_PATHWAY	9	0	1	1
Heart	Arteria	c2.cp.biocarta	BIOCARTA_INFLAM_PATHWAY	http://www.gsea-msigdb.org/gsea/msigdb/cards/BIOCARTA_INFLAM_PATHWAY	9	0	1	1
iPSC-CVPC	Heart	c2.cp.biocarta	BIOCARTA_DC_PATHWAY	http://www.gsea-msigdb.org/gsea/msigdb/cards/BIOCARTA_DC_PATHWAY	5	0	1	1
iPSC-CVPC	Arteria	c2.cp.biocarta	BIOCARTA_DC_PATHWAY	http://www.gsea-msigdb.org/gsea/msigdb/cards/BIOCARTA_DC_PATHWAY	5	4.30013123953848	0.246404002422746	1
Heart	Arteria	c2.cp.biocarta	BIOCARTA_DC_PATHWAY	http://www.gsea-msigdb.org/gsea/msigdb/cards/BIOCARTA_DC_PATHWAY	5	0	1	1
iPSC-CVPC	Heart	c2.cp.biocarta	BIOCARTA_P35ALZHEIMERS_PATHWAY	http://www.gsea-msigdb.org/gsea/msigdb/cards/BIOCARTA_P35ALZHEIMERS_PATHWAY	6	0	1	1
iPSC-CVPC	Arteria	c2.cp.biocarta	BIOCARTA_P35ALZHEIMERS_PATHWAY	http://www.gsea-msigdb.org/gsea/msigdb/cards/BIOCARTA_P35ALZHEIMERS_PATHWAY	6	0	1	1
iPSC-CVPC	Heart	c2.cp.biocarta	BIOCARTA_SKP2E2F_PATHWAY	http://www.gsea-msigdb.org/gsea/msigdb/cards/BIOCARTA_SKP2E2F_PATHWAY	7	0	1	1
iPSC-CVPC	Arteria	c2.cp.biocarta	BIOCARTA_SKP2E2F_PATHWAY	http://www.gsea-msigdb.org/gsea/msigdb/cards/BIOCARTA_SKP2E2F_PATHWAY	7	0	1	1
iPSC-CVPC	Arteria	c2.cp.biocarta	BIOCARTA_ETC_PATHWAY	http://www.gsea-msigdb.org/gsea/msigdb/cards/BIOCARTA_ETC_PATHWAY	4	0	1	1
iPSC-CVPC	Arteria	c2.cp.biocarta	BIOCARTA_EIF_PATHWAY	http://www.gsea-msigdb.org/gsea/msigdb/cards/BIOCARTA_EIF_PATHWAY	12	1.56288361152648	0.492970723871524	1
iPSC-CVPC	Arteria	c2.cp.biocarta	BIOCARTA_TCAPOPTOSIS_PATHWAY	http://www.gsea-msigdb.org/gsea/msigdb/cards/BIOCARTA_TCAPOPTOSIS_PATHWAY	2	0	1	1
Heart	Arteria	c2.cp.biocarta	BIOCARTA_TCAPOPTOSIS_PATHWAY	http://www.gsea-msigdb.org/gsea/msigdb/cards/BIOCARTA_TCAPOPTOSIS_PATHWAY	2	0	1	1
iPSC-CVPC	Heart	c2.cp.biocarta	BIOCARTA_IL17_PATHWAY	http://www.gsea-msigdb.org/gsea/msigdb/cards/BIOCARTA_IL17_PATHWAY	7	0	1	1
iPSC-CVPC	Arteria	c2.cp.biocarta	BIOCARTA_IL17_PATHWAY	http://www.gsea-msigdb.org/gsea/msigdb/cards/BIOCARTA_IL17_PATHWAY	7	0	1	1
iPSC-CVPC	Heart	c2.cp.biocarta	BIOCARTA_IL3_PATHWAY	http://www.gsea-msigdb.org/gsea/msigdb/cards/BIOCARTA_IL3_PATHWAY	12	0	1	1
iPSC-CVPC	Arteria	c2.cp.biocarta	BIOCARTA_IL3_PATHWAY	http://www.gsea-msigdb.org/gsea/msigdb/cards/BIOCARTA_IL3_PATHWAY	12	1.56288361152648	0.492970723871524	1
iPSC-CVPC	Heart	c2.cp.biocarta	BIOCARTA_IL5_PATHWAY	http://www.gsea-msigdb.org/gsea/msigdb/cards/BIOCARTA_IL5_PATHWAY	1	0	1	1
iPSC-CVPC	Arteria	c2.cp.biocarta	BIOCARTA_IL5_PATHWAY	http://www.gsea-msigdb.org/gsea/msigdb/cards/BIOCARTA_IL5_PATHWAY	1	0	1	1
iPSC-CVPC	Heart	c2.cp.biocarta	BIOCARTA_IL10_PATHWAY	http://www.gsea-msigdb.org/gsea/msigdb/cards/BIOCARTA_IL10_PATHWAY	9	0	1	1
iPSC-CVPC	Arteria	c2.cp.biocarta	BIOCARTA_IL10_PATHWAY	http://www.gsea-msigdb.org/gsea/msigdb/cards/BIOCARTA_IL10_PATHWAY	9	2.14962403857217	0.399093657395531	1
Heart	Arteria	c2.cp.biocarta	BIOCARTA_IL2RB_PATHWAY	http://www.gsea-msigdb.org/gsea/msigdb/cards/BIOCARTA_IL2RB_PATHWAY	26	0	1	1
iPSC-CVPC	Arteria	c2.cp.biocarta	BIOCARTA_IL22BP_PATHWAY	http://www.gsea-msigdb.org/gsea/msigdb/cards/BIOCARTA_IL22BP_PATHWAY	8	2.45677597834622	0.36409345665046	1
Heart	Arteria	c2.cp.biocarta	BIOCARTA_IL7_PATHWAY	http://www.gsea-msigdb.org/gsea/msigdb/cards/BIOCARTA_IL7_PATHWAY	11	0	1	1
iPSC-CVPC	Heart	c2.cp.biocarta	BIOCARTA_TCRA_PATHWAY	http://www.gsea-msigdb.org/gsea/msigdb/cards/BIOCARTA_TCRA_PATHWAY	3	0	1	1
iPSC-CVPC	Arteria	c2.cp.biocarta	BIOCARTA_TCRA_PATHWAY	http://www.gsea-msigdb.org/gsea/msigdb/cards/BIOCARTA_TCRA_PATHWAY	3	0	1	1
Heart	Arteria	c2.cp.biocarta	BIOCARTA_TCRA_PATHWAY	http://www.gsea-msigdb.org/gsea/msigdb/cards/BIOCARTA_TCRA_PATHWAY	3	0	1	1
Heart	Arteria	c2.cp.biocarta	BIOCARTA_ETS_PATHWAY	http://www.gsea-msigdb.org/gsea/msigdb/cards/BIOCARTA_ETS_PATHWAY	12	0	1	1
iPSC-CVPC	Arteria	c2.cp.biocarta	BIOCARTA_MONOCYTE_PATHWAY	http://www.gsea-msigdb.org/gsea/msigdb/cards/BIOCARTA_MONOCYTE_PATHWAY	6	0	1	1
Heart	Arteria	c2.cp.biocarta	BIOCARTA_NFKB_PATHWAY	http://www.gsea-msigdb.org/gsea/msigdb/cards/BIOCARTA_NFKB_PATHWAY	17	0	1	1
iPSC-CVPC	Heart	c2.cp.biocarta	BIOCARTA_NO2IL12_PATHWAY	http://www.gsea-msigdb.org/gsea/msigdb/cards/BIOCARTA_NO2IL12_PATHWAY	4	0	1	1
iPSC-CVPC	Arteria	c2.cp.biocarta	BIOCARTA_NO2IL12_PATHWAY	http://www.gsea-msigdb.org/gsea/msigdb/cards/BIOCARTA_NO2IL12_PATHWAY	4	0	1	1
Heart	Arteria	c2.cp.biocarta	BIOCARTA_NKCELLS_PATHWAY	http://www.gsea-msigdb.org/gsea/msigdb/cards/BIOCARTA_NKCELLS_PATHWAY	11	10.1438400278532	0.103093861652482	1
iPSC-CVPC	Heart	c2.cp.biocarta	BIOCARTA_RB_PATHWAY	http://www.gsea-msigdb.org/gsea/msigdb/cards/BIOCARTA_RB_PATHWAY	7	0	1	1
iPSC-CVPC	Heart	c2.cp.biocarta	BIOCARTA_CK1_PATHWAY	http://www.gsea-msigdb.org/gsea/msigdb/cards/BIOCARTA_CK1_PATHWAY	9	0	1	1
iPSC-CVPC	Arteria	c2.cp.biocarta	BIOCARTA_CK1_PATHWAY	http://www.gsea-msigdb.org/gsea/msigdb/cards/BIOCARTA_CK1_PATHWAY	9	0	1	1
iPSC-CVPC	Arteria	c2.cp.biocarta	BIOCARTA_EIF2_PATHWAY	http://www.gsea-msigdb.org/gsea/msigdb/cards/BIOCARTA_EIF2_PATHWAY	10	1.91058868467145	0.432170553786081	1
iPSC-CVPC	Heart	c2.cp.biocarta	BIOCARTA_P27_PATHWAY	http://www.gsea-msigdb.org/gsea/msigdb/cards/BIOCARTA_P27_PATHWAY	7	0	1	1
iPSC-CVPC	Arteria	c2.cp.biocarta	BIOCARTA_P27_PATHWAY	http://www.gsea-msigdb.org/gsea/msigdb/cards/BIOCARTA_P27_PATHWAY	7	0	1	1
Heart	Arteria	c2.cp.biocarta	BIOCARTA_PML_PATHWAY	http://www.gsea-msigdb.org/gsea/msigdb/cards/BIOCARTA_PML_PATHWAY	13	0	1	1
iPSC-CVPC	Heart	c2.cp.biocarta	BIOCARTA_RANMS_PATHWAY	http://www.gsea-msigdb.org/gsea/msigdb/cards/BIOCARTA_RANMS_PATHWAY	4	0	1	1
Heart	Arteria	c2.cp.biocarta	BIOCARTA_TOB1_PATHWAY	http://www.gsea-msigdb.org/gsea/msigdb/cards/BIOCARTA_TOB1_PATHWAY	8	0	1	1
iPSC-CVPC	Heart	c2.cp.biocarta	BIOCARTA_NKT_PATHWAY	http://www.gsea-msigdb.org/gsea/msigdb/cards/BIOCARTA_NKT_PATHWAY	8	0	1	1
iPSC-CVPC	Arteria	c2.cp.biocarta	BIOCARTA_NKT_PATHWAY	http://www.gsea-msigdb.org/gsea/msigdb/cards/BIOCARTA_NKT_PATHWAY	8	0	1	1
iPSC-CVPC	Heart	c2.cp.biocarta	BIOCARTA_SHH_PATHWAY	http://www.gsea-msigdb.org/gsea/msigdb/cards/BIOCARTA_SHH_PATHWAY	10	0	1	1
iPSC-CVPC	Arteria	c2.cp.biocarta	BIOCARTA_SHH_PATHWAY	http://www.gsea-msigdb.org/gsea/msigdb/cards/BIOCARTA_SHH_PATHWAY	10	0	1	1
iPSC-CVPC	Heart	c2.cp.biocarta	BIOCARTA_PTC1_PATHWAY	http://www.gsea-msigdb.org/gsea/msigdb/cards/BIOCARTA_PTC1_PATHWAY	8	0	1	1
iPSC-CVPC	Heart	c2.cp.biocarta	BIOCARTA_TCYTOTOXIC_PATHWAY	http://www.gsea-msigdb.org/gsea/msigdb/cards/BIOCARTA_TCYTOTOXIC_PATHWAY	4	0	1	1
iPSC-CVPC	Arteria	c2.cp.biocarta	BIOCARTA_TCYTOTOXIC_PATHWAY	http://www.gsea-msigdb.org/gsea/msigdb/cards/BIOCARTA_TCYTOTOXIC_PATHWAY	4	0	1	1
Heart	Arteria	c2.cp.biocarta	BIOCARTA_TCYTOTOXIC_PATHWAY	http://www.gsea-msigdb.org/gsea/msigdb/cards/BIOCARTA_TCYTOTOXIC_PATHWAY	4	0	1	1
iPSC-CVPC	Heart	c2.cp.biocarta	BIOCARTA_THELPER_PATHWAY	http://www.gsea-msigdb.org/gsea/msigdb/cards/BIOCARTA_THELPER_PATHWAY	4	0	1	1
iPSC-CVPC	Arteria	c2.cp.biocarta	BIOCARTA_THELPER_PATHWAY	http://www.gsea-msigdb.org/gsea/msigdb/cards/BIOCARTA_THELPER_PATHWAY	4	0	1	1
Heart	Arteria	c2.cp.biocarta	BIOCARTA_THELPER_PATHWAY	http://www.gsea-msigdb.org/gsea/msigdb/cards/BIOCARTA_THELPER_PATHWAY	4	0	1	1
iPSC-CVPC	Heart	c2.cp.biocarta	BIOCARTA_TH1TH2_PATHWAY	http://www.gsea-msigdb.org/gsea/msigdb/cards/BIOCARTA_TH1TH2_PATHWAY	6	0	1	1
iPSC-CVPC	Arteria	c2.cp.biocarta	BIOCARTA_TH1TH2_PATHWAY	http://www.gsea-msigdb.org/gsea/msigdb/cards/BIOCARTA_TH1TH2_PATHWAY	6	0	1	1
Heart	Arteria	c2.cp.biocarta	BIOCARTA_TH1TH2_PATHWAY	http://www.gsea-msigdb.org/gsea/msigdb/cards/BIOCARTA_TH1TH2_PATHWAY	6	0	1	1
Heart	Arteria	c2.cp.biocarta	BIOCARTA_41BB_PATHWAY	http://www.gsea-msigdb.org/gsea/msigdb/cards/BIOCARTA_41BB_PATHWAY	11	0	1	1
iPSC-CVPC	Heart	c2.cp.biocarta	BIOCARTA_CREB_PATHWAY	http://www.gsea-msigdb.org/gsea/msigdb/cards/BIOCARTA_CREB_PATHWAY	16	0	1	1
iPSC-CVPC	Heart	c2.cp.biocarta	BIOCARTA_ARF_PATHWAY	http://www.gsea-msigdb.org/gsea/msigdb/cards/BIOCARTA_ARF_PATHWAY	14	0	1	1
iPSC-CVPC	Heart	c2.cp.biocarta	BIOCARTA_EICOSANOID_PATHWAY	http://www.gsea-msigdb.org/gsea/msigdb/cards/BIOCARTA_EICOSANOID_PATHWAY	13	0	1	1
iPSC-CVPC	Arteria	c2.cp.biocarta	BIOCARTA_EICOSANOID_PATHWAY	http://www.gsea-msigdb.org/gsea/msigdb/cards/BIOCARTA_EICOSANOID_PATHWAY	13	1.4325200938926	0.520888009781609	1
iPSC-CVPC	Heart	c2.cp.biocarta	BIOCARTA_HSWI_SNF_PATHWAY	http://www.gsea-msigdb.org/gsea/msigdb/cards/BIOCARTA_HSWI_SNF_PATHWAY	11	0	1	1
iPSC-CVPC	Heart	c2.cp.biocarta	BIOCARTA_NEUTROPHIL_PATHWAY	http://www.gsea-msigdb.org/gsea/msigdb/cards/BIOCARTA_NEUTROPHIL_PATHWAY	4	0	1	1
iPSC-CVPC	Arteria	c2.cp.biocarta	BIOCARTA_NEUTROPHIL_PATHWAY	http://www.gsea-msigdb.org/gsea/msigdb/cards/BIOCARTA_NEUTROPHIL_PATHWAY	4	0	1	1
iPSC-CVPC	Heart	c2.cp.biocarta	BIOCARTA_EFP_PATHWAY	http://www.gsea-msigdb.org/gsea/msigdb/cards/BIOCARTA_EFP_PATHWAY	12	2.6311276912316	0.335331830253007	1
Heart	Arteria	c2.cp.biocarta	BIOCARTA_EFP_PATHWAY	http://www.gsea-msigdb.org/gsea/msigdb/cards/BIOCARTA_EFP_PATHWAY	12	0	1	1
iPSC-CVPC	Heart	c2.cp.biocarta	BIOCARTA_VOBESITY_PATHWAY	http://www.gsea-msigdb.org/gsea/msigdb/cards/BIOCARTA_VOBESITY_PATHWAY	4	0	1	1
iPSC-CVPC	Arteria	c2.cp.biocarta	BIOCARTA_VOBESITY_PATHWAY	http://www.gsea-msigdb.org/gsea/msigdb/cards/BIOCARTA_VOBESITY_PATHWAY	4	0	1	1
iPSC-CVPC	Heart	c2.cp.biocarta	BIOCARTA_MHC_PATHWAY	http://www.gsea-msigdb.org/gsea/msigdb/cards/BIOCARTA_MHC_PATHWAY	5	0	1	1
iPSC-CVPC	Heart	c2.cp.biocarta	BIOCARTA_BBCELL_PATHWAY	http://www.gsea-msigdb.org/gsea/msigdb/cards/BIOCARTA_BBCELL_PATHWAY	2	0	1	1
iPSC-CVPC	Arteria	c2.cp.biocarta	BIOCARTA_BBCELL_PATHWAY	http://www.gsea-msigdb.org/gsea/msigdb/cards/BIOCARTA_BBCELL_PATHWAY	2	0	1	1
Heart	Arteria	c2.cp.biocarta	BIOCARTA_BBCELL_PATHWAY	http://www.gsea-msigdb.org/gsea/msigdb/cards/BIOCARTA_BBCELL_PATHWAY	2	0	1	1
iPSC-CVPC	Heart	c2.cp.biocarta	BIOCARTA_NPC_PATHWAY	http://www.gsea-msigdb.org/gsea/msigdb/cards/BIOCARTA_NPC_PATHWAY	3	0	1	1
iPSC-CVPC	Arteria	c2.cp.biocarta	BIOCARTA_NPC_PATHWAY	http://www.gsea-msigdb.org/gsea/msigdb/cards/BIOCARTA_NPC_PATHWAY	3	0	1	1
iPSC-CVPC	Heart	c2.cp.biocarta	BIOCARTA_ERBB4_PATHWAY	http://www.gsea-msigdb.org/gsea/msigdb/cards/BIOCARTA_ERBB4_PATHWAY	3	0	1	1
iPSC-CVPC	Arteria	c2.cp.biocarta	BIOCARTA_ERBB4_PATHWAY	http://www.gsea-msigdb.org/gsea/msigdb/cards/BIOCARTA_ERBB4_PATHWAY	3	0	1	1
iPSC-CVPC	Heart	c2.cp.biocarta	BIOCARTA_RNAPOL3_PATHWAY	http://www.gsea-msigdb.org/gsea/msigdb/cards/BIOCARTA_RNAPOL3_PATHWAY	5	0	1	1
iPSC-CVPC	Heart	c2.cp.biocarta	BIOCARTA_EOSINOPHILS_PATHWAY	http://www.gsea-msigdb.org/gsea/msigdb/cards/BIOCARTA_EOSINOPHILS_PATHWAY	1	0	1	1
iPSC-CVPC	Arteria	c2.cp.biocarta	BIOCARTA_REELIN_PATHWAY	http://www.gsea-msigdb.org/gsea/msigdb/cards/BIOCARTA_REELIN_PATHWAY	5	0	1	1
iPSC-CVPC	Arteria	c2.cp.biocarta	BIOCARTA_FBW7_PATHWAY	http://www.gsea-msigdb.org/gsea/msigdb/cards/BIOCARTA_FBW7_PATHWAY	7	0	1	1
iPSC-CVPC	Arteria	c2.cp.biocarta	BIOCARTA_RECK_PATHWAY	http://www.gsea-msigdb.org/gsea/msigdb/cards/BIOCARTA_RECK_PATHWAY	5	0	1	1
Heart	Arteria	c2.cp.biocarta	BIOCARTA_RECK_PATHWAY	http://www.gsea-msigdb.org/gsea/msigdb/cards/BIOCARTA_RECK_PATHWAY	5	0	1	1
iPSC-CVPC	Arteria	c2.cp.biocarta	BIOCARTA_ALTERNATIVE_PATHWAY	http://www.gsea-msigdb.org/gsea/msigdb/cards/BIOCARTA_ALTERNATIVE_PATHWAY	7	0	1	1
iPSC-CVPC	Arteria	c2.cp.biocarta	BIOCARTA_RAN_PATHWAY	http://www.gsea-msigdb.org/gsea/msigdb/cards/BIOCARTA_RAN_PATHWAY	2	0	1	1
Heart	Arteria	c2.cp.kegg	KEGG_GLYCOLYSIS_GLUCONEOGENESIS	http://www.gsea-msigdb.org/gsea/msigdb/cards/KEGG_GLYCOLYSIS_GLUCONEOGENESIS	30	7.30621443033647	0.0348718534712543	1
iPSC-CVPC	Arteria	c2.cp.kegg	KEGG_CITRATE_CYCLE_TCA_CYCLE	http://www.gsea-msigdb.org/gsea/msigdb/cards/KEGG_CITRATE_CYCLE_TCA_CYCLE	17	1.07398001056137	0.618029952569981	1
Heart	Arteria	c2.cp.kegg	KEGG_CITRATE_CYCLE_TCA_CYCLE	http://www.gsea-msigdb.org/gsea/msigdb/cards/KEGG_CITRATE_CYCLE_TCA_CYCLE	17	0	1	1
Heart	Arteria	c2.cp.kegg	KEGG_FATTY_ACID_METABOLISM	http://www.gsea-msigdb.org/gsea/msigdb/cards/KEGG_FATTY_ACID_METABOLISM	26	0	1	1
iPSC-CVPC	Arteria	c2.cp.kegg	KEGG_STEROID_BIOSYNTHESIS	http://www.gsea-msigdb.org/gsea/msigdb/cards/KEGG_STEROID_BIOSYNTHESIS	9	2.14962403857217	0.399093657395531	1
iPSC-CVPC	Heart	c2.cp.kegg	KEGG_OXIDATIVE_PHOSPHORYLATION	http://www.gsea-msigdb.org/gsea/msigdb/cards/KEGG_OXIDATIVE_PHOSPHORYLATION	44	2.12357724389968	0.181520833347472	1
iPSC-CVPC	Arteria	c2.cp.kegg	KEGG_OXIDATIVE_PHOSPHORYLATION	http://www.gsea-msigdb.org/gsea/msigdb/cards/KEGG_OXIDATIVE_PHOSPHORYLATION	44	0.398586655630671	0.516502856032231	1
Heart	Arteria	c2.cp.kegg	KEGG_OXIDATIVE_PHOSPHORYLATION	http://www.gsea-msigdb.org/gsea/msigdb/cards/KEGG_OXIDATIVE_PHOSPHORYLATION	44	7.547833473836	0.00914736355579657	0.944959036873383
iPSC-CVPC	Arteria	c2.cp.kegg	KEGG_VALINE_LEUCINE_AND_ISOLEUCINE_DEGRADATION	http://www.gsea-msigdb.org/gsea/msigdb/cards/KEGG_VALINE_LEUCINE_AND_ISOLEUCINE_DEGRADATION	33	1.72180034165572	0.425957286994129	1
Heart	Arteria	c2.cp.kegg	KEGG_VALINE_LEUCINE_AND_ISOLEUCINE_DEGRADATION	http://www.gsea-msigdb.org/gsea/msigdb/cards/KEGG_VALINE_LEUCINE_AND_ISOLEUCINE_DEGRADATION	33	3.16519039056343	0.278736693159645	1
iPSC-CVPC	Heart	c2.cp.kegg	KEGG_VALINE_LEUCINE_AND_ISOLEUCINE_BIOSYNTHESIS	http://www.gsea-msigdb.org/gsea/msigdb/cards/KEGG_VALINE_LEUCINE_AND_ISOLEUCINE_BIOSYNTHESIS	7	0	1	1
iPSC-CVPC	Arteria	c2.cp.kegg	KEGG_VALINE_LEUCINE_AND_ISOLEUCINE_BIOSYNTHESIS	http://www.gsea-msigdb.org/gsea/msigdb/cards/KEGG_VALINE_LEUCINE_AND_ISOLEUCINE_BIOSYNTHESIS	7	6.88959566708754	0.0527411214668516	1
iPSC-CVPC	Heart	c2.cp.kegg	KEGG_LYSINE_DEGRADATION	http://www.gsea-msigdb.org/gsea/msigdb/cards/KEGG_LYSINE_DEGRADATION	30	0	0.62534481433129	1
iPSC-CVPC	Arteria	c2.cp.kegg	KEGG_LYSINE_DEGRADATION	http://www.gsea-msigdb.org/gsea/msigdb/cards/KEGG_LYSINE_DEGRADATION	30	0	0.409551880321668	1
Heart	Arteria	c2.cp.kegg	KEGG_ARGININE_AND_PROLINE_METABOLISM	http://www.gsea-msigdb.org/gsea/msigdb/cards/KEGG_ARGININE_AND_PROLINE_METABOLISM	29	0	1	1
iPSC-CVPC	Heart	c2.cp.kegg	KEGG_N_GLYCAN_BIOSYNTHESIS	http://www.gsea-msigdb.org/gsea/msigdb/cards/KEGG_N_GLYCAN_BIOSYNTHESIS	34	0.875307657216244	1	1
iPSC-CVPC	Arteria	c2.cp.kegg	KEGG_N_GLYCAN_BIOSYNTHESIS	http://www.gsea-msigdb.org/gsea/msigdb/cards/KEGG_N_GLYCAN_BIOSYNTHESIS	34	0.519868770721711	1	1
iPSC-CVPC	Heart	c2.cp.kegg	KEGG_ARACHIDONIC_ACID_METABOLISM	http://www.gsea-msigdb.org/gsea/msigdb/cards/KEGG_ARACHIDONIC_ACID_METABOLISM	20	1.52222000786147	0.493909020284852	1
iPSC-CVPC	Arteria	c2.cp.kegg	KEGG_ARACHIDONIC_ACID_METABOLISM	http://www.gsea-msigdb.org/gsea/msigdb/cards/KEGG_ARACHIDONIC_ACID_METABOLISM	20	0.904174230095951	1	1
iPSC-CVPC	Heart	c2.cp.kegg	KEGG_LINOLEIC_ACID_METABOLISM	http://www.gsea-msigdb.org/gsea/msigdb/cards/KEGG_LINOLEIC_ACID_METABOLISM	6	5.78985836715158	0.184680528439674	1
Heart	Arteria	c2.cp.kegg	KEGG_PYRUVATE_METABOLISM	http://www.gsea-msigdb.org/gsea/msigdb/cards/KEGG_PYRUVATE_METABOLISM	25	4.22308414622933	0.219207010488077	1
Heart	Arteria	c2.cp.kegg	KEGG_PROPANOATE_METABOLISM	http://www.gsea-msigdb.org/gsea/msigdb/cards/KEGG_PROPANOATE_METABOLISM	20	11.3719083190974	0.016229275767711	1
Heart	Arteria	c2.cp.kegg	KEGG_BUTANOATE_METABOLISM	http://www.gsea-msigdb.org/gsea/msigdb/cards/KEGG_BUTANOATE_METABOLISM	18	0	1	1
iPSC-CVPC	Arteria	c2.cp.kegg	KEGG_TERPENOID_BACKBONE_BIOSYNTHESIS	http://www.gsea-msigdb.org/gsea/msigdb/cards/KEGG_TERPENOID_BACKBONE_BIOSYNTHESIS	11	0	1	1
Heart	Arteria	c2.cp.kegg	KEGG_TERPENOID_BACKBONE_BIOSYNTHESIS	http://www.gsea-msigdb.org/gsea/msigdb/cards/KEGG_TERPENOID_BACKBONE_BIOSYNTHESIS	11	0	1	1
iPSC-CVPC	Heart	c2.cp.kegg	KEGG_AMINOACYL_TRNA_BIOSYNTHESIS	http://www.gsea-msigdb.org/gsea/msigdb/cards/KEGG_AMINOACYL_TRNA_BIOSYNTHESIS	25	0	1	1
iPSC-CVPC	Arteria	c2.cp.kegg	KEGG_AMINOACYL_TRNA_BIOSYNTHESIS	http://www.gsea-msigdb.org/gsea/msigdb/cards/KEGG_AMINOACYL_TRNA_BIOSYNTHESIS	25	0.715455254776908	1	1
Heart	Arteria	c2.cp.kegg	KEGG_AMINOACYL_TRNA_BIOSYNTHESIS	http://www.gsea-msigdb.org/gsea/msigdb/cards/KEGG_AMINOACYL_TRNA_BIOSYNTHESIS	25	0	1	1
iPSC-CVPC	Arteria	c2.cp.kegg	KEGG_DRUG_METABOLISM_CYTOCHROME_P450	http://www.gsea-msigdb.org/gsea/msigdb/cards/KEGG_DRUG_METABOLISM_CYTOCHROME_P450	20	5.7660103734781	0.00384585367895901	0.659654610037672
iPSC-CVPC	Arteria	c2.cp.kegg	KEGG_BIOSYNTHESIS_OF_UNSATURATED_FATTY_ACIDS	http://www.gsea-msigdb.org/gsea/msigdb/cards/KEGG_BIOSYNTHESIS_OF_UNSATURATED_FATTY_ACIDS	12	1.56288361152648	0.492970723871524	1
iPSC-CVPC	Heart	c2.cp.kegg	KEGG_RIBOSOME	http://www.gsea-msigdb.org/gsea/msigdb/cards/KEGG_RIBOSOME	26	2.41562913732889	0.215511023774799	1
iPSC-CVPC	Arteria	c2.cp.kegg	KEGG_RIBOSOME	http://www.gsea-msigdb.org/gsea/msigdb/cards/KEGG_RIBOSOME	26	2.24742632042282	0.169512716097676	1
Heart	Arteria	c2.cp.kegg	KEGG_RIBOSOME	http://www.gsea-msigdb.org/gsea/msigdb/cards/KEGG_RIBOSOME	26	0	1	1
iPSC-CVPC	Heart	c2.cp.kegg	KEGG_RNA_DEGRADATION	http://www.gsea-msigdb.org/gsea/msigdb/cards/KEGG_RNA_DEGRADATION	42	0.703977635599021	1	1
iPSC-CVPC	Arteria	c2.cp.kegg	KEGG_RNA_DEGRADATION	http://www.gsea-msigdb.org/gsea/msigdb/cards/KEGG_RNA_DEGRADATION	42	2.3330911506392	0.0788422172987687	1
iPSC-CVPC	Arteria	c2.cp.kegg	KEGG_RNA_POLYMERASE	http://www.gsea-msigdb.org/gsea/msigdb/cards/KEGG_RNA_POLYMERASE	15	0	1	1
iPSC-CVPC	Heart	c2.cp.kegg	KEGG_BASAL_TRANSCRIPTION_FACTORS	http://www.gsea-msigdb.org/gsea/msigdb/cards/KEGG_BASAL_TRANSCRIPTION_FACTORS	19	0	1	1
iPSC-CVPC	Arteria	c2.cp.kegg	KEGG_BASAL_TRANSCRIPTION_FACTORS	http://www.gsea-msigdb.org/gsea/msigdb/cards/KEGG_BASAL_TRANSCRIPTION_FACTORS	19	0.954497488400478	1	1
iPSC-CVPC	Heart	c2.cp.kegg	KEGG_DNA_REPLICATION	http://www.gsea-msigdb.org/gsea/msigdb/cards/KEGG_DNA_REPLICATION	24	0	1	1
iPSC-CVPC	Arteria	c2.cp.kegg	KEGG_DNA_REPLICATION	http://www.gsea-msigdb.org/gsea/msigdb/cards/KEGG_DNA_REPLICATION	24	0	0.640378071435149	1
iPSC-CVPC	Heart	c2.cp.kegg	KEGG_SPLICEOSOME	http://www.gsea-msigdb.org/gsea/msigdb/cards/KEGG_SPLICEOSOME	91	2.82564468438494	0.011031301176303	0.996972473491877
iPSC-CVPC	Arteria	c2.cp.kegg	KEGG_PROTEASOME	http://www.gsea-msigdb.org/gsea/msigdb/cards/KEGG_PROTEASOME	26	2.24742632042282	0.169512716097676	1
Heart	Arteria	c2.cp.kegg	KEGG_PROTEASOME	http://www.gsea-msigdb.org/gsea/msigdb/cards/KEGG_PROTEASOME	26	4.05399016327951	0.226906415437246	1
iPSC-CVPC	Heart	c2.cp.kegg	KEGG_PPAR_SIGNALING_PATHWAY	http://www.gsea-msigdb.org/gsea/msigdb/cards/KEGG_PPAR_SIGNALING_PATHWAY	39	1.56502649585248	0.376772191924083	1
iPSC-CVPC	Heart	c2.cp.kegg	KEGG_NUCLEOTIDE_EXCISION_REPAIR	http://www.gsea-msigdb.org/gsea/msigdb/cards/KEGG_NUCLEOTIDE_EXCISION_REPAIR	35	0	0.631287551450278	1
iPSC-CVPC	Arteria	c2.cp.kegg	KEGG_NUCLEOTIDE_EXCISION_REPAIR	http://www.gsea-msigdb.org/gsea/msigdb/cards/KEGG_NUCLEOTIDE_EXCISION_REPAIR	35	1.04150225927059	0.718695057633147	1
iPSC-CVPC	Heart	c2.cp.kegg	KEGG_MISMATCH_REPAIR	http://www.gsea-msigdb.org/gsea/msigdb/cards/KEGG_MISMATCH_REPAIR	18	0	1	1
iPSC-CVPC	Arteria	c2.cp.kegg	KEGG_MISMATCH_REPAIR	http://www.gsea-msigdb.org/gsea/msigdb/cards/KEGG_MISMATCH_REPAIR	18	1.01074094004007	1	1
iPSC-CVPC	Heart	c2.cp.kegg	KEGG_CYTOKINE_CYTOKINE_RECEPTOR_INTERACTION	http://www.gsea-msigdb.org/gsea/msigdb/cards/KEGG_CYTOKINE_CYTOKINE_RECEPTOR_INTERACTION	96	1.25923613525276	0.564566998056024	1
iPSC-CVPC	Arteria	c2.cp.kegg	KEGG_CYTOKINE_CYTOKINE_RECEPTOR_INTERACTION	http://www.gsea-msigdb.org/gsea/msigdb/cards/KEGG_CYTOKINE_CYTOKINE_RECEPTOR_INTERACTION	96	0.745329859095441	0.820462280839528	1
Heart	Arteria	c2.cp.kegg	KEGG_CYTOKINE_CYTOKINE_RECEPTOR_INTERACTION	http://www.gsea-msigdb.org/gsea/msigdb/cards/KEGG_CYTOKINE_CYTOKINE_RECEPTOR_INTERACTION	96	0	1	1
iPSC-CVPC	Heart	c2.cp.kegg	KEGG_CHEMOKINE_SIGNALING_PATHWAY	http://www.gsea-msigdb.org/gsea/msigdb/cards/KEGG_CHEMOKINE_SIGNALING_PATHWAY	104	0.564172852968549	0.587087521896716	1
iPSC-CVPC	Arteria	c2.cp.kegg	KEGG_CHEMOKINE_SIGNALING_PATHWAY	http://www.gsea-msigdb.org/gsea/msigdb/cards/KEGG_CHEMOKINE_SIGNALING_PATHWAY	104	1.24282518245827	0.516065754407246	1
Heart	Arteria	c2.cp.kegg	KEGG_CHEMOKINE_SIGNALING_PATHWAY	http://www.gsea-msigdb.org/gsea/msigdb/cards/KEGG_CHEMOKINE_SIGNALING_PATHWAY	104	0.976943856349462	1	1
iPSC-CVPC	Arteria	c2.cp.kegg	KEGG_PHOSPHATIDYLINOSITOL_SIGNALING_SYSTEM	http://www.gsea-msigdb.org/gsea/msigdb/cards/KEGG_PHOSPHATIDYLINOSITOL_SIGNALING_SYSTEM	49	1.1211898064074	0.750539406185429	1
iPSC-CVPC	Heart	c2.cp.kegg	KEGG_CELL_CYCLE	http://www.gsea-msigdb.org/gsea/msigdb/cards/KEGG_CELL_CYCLE	81	0.359432262961139	0.527150355150632	1
iPSC-CVPC	Arteria	c2.cp.kegg	KEGG_CELL_CYCLE	http://www.gsea-msigdb.org/gsea/msigdb/cards/KEGG_CELL_CYCLE	81	2.44434043283673	0.013013686050169	1
iPSC-CVPC	Heart	c2.cp.kegg	KEGG_OOCYTE_MEIOSIS	http://www.gsea-msigdb.org/gsea/msigdb/cards/KEGG_OOCYTE_MEIOSIS	68	0.429714920856663	0.729396770071806	1
iPSC-CVPC	Arteria	c2.cp.kegg	KEGG_OOCYTE_MEIOSIS	http://www.gsea-msigdb.org/gsea/msigdb/cards/KEGG_OOCYTE_MEIOSIS	68	1.07436025640004	0.788625078872511	1
iPSC-CVPC	Heart	c2.cp.kegg	KEGG_P53_SIGNALING_PATHWAY	http://www.gsea-msigdb.org/gsea/msigdb/cards/KEGG_P53_SIGNALING_PATHWAY	41	0.72164629793489	1	1
Heart	Arteria	c2.cp.kegg	KEGG_P53_SIGNALING_PATHWAY	http://www.gsea-msigdb.org/gsea/msigdb/cards/KEGG_P53_SIGNALING_PATHWAY	41	0	1	1
iPSC-CVPC	Heart	c2.cp.kegg	KEGG_UBIQUITIN_MEDIATED_PROTEOLYSIS	http://www.gsea-msigdb.org/gsea/msigdb/cards/KEGG_UBIQUITIN_MEDIATED_PROTEOLYSIS	99	1.21911755471554	0.574857848053634	1
iPSC-CVPC	Arteria	c2.cp.kegg	KEGG_UBIQUITIN_MEDIATED_PROTEOLYSIS	http://www.gsea-msigdb.org/gsea/msigdb/cards/KEGG_UBIQUITIN_MEDIATED_PROTEOLYSIS	99	1.94658187481536	0.0697464153364618	1
iPSC-CVPC	Heart	c2.cp.kegg	KEGG_LYSOSOME	http://www.gsea-msigdb.org/gsea/msigdb/cards/KEGG_LYSOSOME	81	1.50669137179497	0.349466583201191	1
iPSC-CVPC	Arteria	c2.cp.kegg	KEGG_LYSOSOME	http://www.gsea-msigdb.org/gsea/msigdb/cards/KEGG_LYSOSOME	81	1.13151916020367	0.804023755531183	1
Heart	Arteria	c2.cp.kegg	KEGG_PEROXISOME	http://www.gsea-msigdb.org/gsea/msigdb/cards/KEGG_PEROXISOME	53	0	1	1
iPSC-CVPC	Arteria	c2.cp.kegg	KEGG_CARDIAC_MUSCLE_CONTRACTION	http://www.gsea-msigdb.org/gsea/msigdb/cards/KEGG_CARDIAC_MUSCLE_CONTRACTION	34	1.07410632471942	0.710803280946435	1
Heart	Arteria	c2.cp.kegg	KEGG_CARDIAC_MUSCLE_CONTRACTION	http://www.gsea-msigdb.org/gsea/msigdb/cards/KEGG_CARDIAC_MUSCLE_CONTRACTION	34	18.1402719159838	1.85711135182042e-05	0.0241179071736593
iPSC-CVPC	Arteria	c2.cp.kegg	KEGG_VASCULAR_SMOOTH_MUSCLE_CONTRACTION	http://www.gsea-msigdb.org/gsea/msigdb/cards/KEGG_VASCULAR_SMOOTH_MUSCLE_CONTRACTION	65	0.830543847581619	1	1
iPSC-CVPC	Heart	c2.cp.kegg	KEGG_WNT_SIGNALING_PATHWAY	http://www.gsea-msigdb.org/gsea/msigdb/cards/KEGG_WNT_SIGNALING_PATHWAY	92	0.640143715931853	0.771490424291341	1
iPSC-CVPC	Arteria	c2.cp.kegg	KEGG_WNT_SIGNALING_PATHWAY	http://www.gsea-msigdb.org/gsea/msigdb/cards/KEGG_WNT_SIGNALING_PATHWAY	92	0.37973805989724	0.244577652858348	1
Heart	Arteria	c2.cp.kegg	KEGG_NOTCH_SIGNALING_PATHWAY	http://www.gsea-msigdb.org/gsea/msigdb/cards/KEGG_NOTCH_SIGNALING_PATHWAY	33	0	1	1
iPSC-CVPC	Heart	c2.cp.kegg	KEGG_HEDGEHOG_SIGNALING_PATHWAY	http://www.gsea-msigdb.org/gsea/msigdb/cards/KEGG_HEDGEHOG_SIGNALING_PATHWAY	23	0	1	1
iPSC-CVPC	Arteria	c2.cp.kegg	KEGG_HEDGEHOG_SIGNALING_PATHWAY	http://www.gsea-msigdb.org/gsea/msigdb/cards/KEGG_HEDGEHOG_SIGNALING_PATHWAY	23	0	0.635294981278317	1
iPSC-CVPC	Arteria	c2.cp.kegg	KEGG_AXON_GUIDANCE	http://www.gsea-msigdb.org/gsea/msigdb/cards/KEGG_AXON_GUIDANCE	80	0.438682670042801	0.325988154069382	1
iPSC-CVPC	Heart	c2.cp.kegg	KEGG_CELL_ADHESION_MOLECULES_CAMS	http://www.gsea-msigdb.org/gsea/msigdb/cards/KEGG_CELL_ADHESION_MOLECULES_CAMS	64	0.457175531296031	0.725588167074547	1
iPSC-CVPC	Arteria	c2.cp.kegg	KEGG_CELL_ADHESION_MOLECULES_CAMS	http://www.gsea-msigdb.org/gsea/msigdb/cards/KEGG_CELL_ADHESION_MOLECULES_CAMS	64	0.844243048238539	1	1
Heart	Arteria	c2.cp.kegg	KEGG_CELL_ADHESION_MOLECULES_CAMS	http://www.gsea-msigdb.org/gsea/msigdb/cards/KEGG_CELL_ADHESION_MOLECULES_CAMS	64	1.6032181636471	0.469867320202464	1
iPSC-CVPC	Heart	c2.cp.kegg	KEGG_ADHERENS_JUNCTION	http://www.gsea-msigdb.org/gsea/msigdb/cards/KEGG_ADHERENS_JUNCTION	59	1.55255968552477	0.449563246193746	1
iPSC-CVPC	Heart	c2.cp.kegg	KEGG_COMPLEMENT_AND_COAGULATION_CASCADES	http://www.gsea-msigdb.org/gsea/msigdb/cards/KEGG_COMPLEMENT_AND_COAGULATION_CASCADES	36	0.825133033539165	1	1
iPSC-CVPC	Arteria	c2.cp.kegg	KEGG_COMPLEMENT_AND_COAGULATION_CASCADES	http://www.gsea-msigdb.org/gsea/msigdb/cards/KEGG_COMPLEMENT_AND_COAGULATION_CASCADES	36	1.01075929371664	1	1
iPSC-CVPC	Heart	c2.cp.kegg	KEGG_ANTIGEN_PROCESSING_AND_PRESENTATION	http://www.gsea-msigdb.org/gsea/msigdb/cards/KEGG_ANTIGEN_PROCESSING_AND_PRESENTATION	29	1.03211027703323	1	1
iPSC-CVPC	Arteria	c2.cp.kegg	KEGG_ANTIGEN_PROCESSING_AND_PRESENTATION	http://www.gsea-msigdb.org/gsea/msigdb/cards/KEGG_ANTIGEN_PROCESSING_AND_PRESENTATION	29	0.61300542962361	1	1
iPSC-CVPC	Heart	c2.cp.kegg	KEGG_TOLL_LIKE_RECEPTOR_SIGNALING_PATHWAY	http://www.gsea-msigdb.org/gsea/msigdb/cards/KEGG_TOLL_LIKE_RECEPTOR_SIGNALING_PATHWAY	61	0	0.27143760931099	1
iPSC-CVPC	Arteria	c2.cp.kegg	KEGG_TOLL_LIKE_RECEPTOR_SIGNALING_PATHWAY	http://www.gsea-msigdb.org/gsea/msigdb/cards/KEGG_TOLL_LIKE_RECEPTOR_SIGNALING_PATHWAY	61	0.888174562732361	1	1
Heart	Arteria	c2.cp.kegg	KEGG_TOLL_LIKE_RECEPTOR_SIGNALING_PATHWAY	http://www.gsea-msigdb.org/gsea/msigdb/cards/KEGG_TOLL_LIKE_RECEPTOR_SIGNALING_PATHWAY	61	0	1	1
iPSC-CVPC	Heart	c2.cp.kegg	KEGG_NOD_LIKE_RECEPTOR_SIGNALING_PATHWAY	http://www.gsea-msigdb.org/gsea/msigdb/cards/KEGG_NOD_LIKE_RECEPTOR_SIGNALING_PATHWAY	42	0	0.403776386834202	1
iPSC-CVPC	Arteria	c2.cp.kegg	KEGG_NOD_LIKE_RECEPTOR_SIGNALING_PATHWAY	http://www.gsea-msigdb.org/gsea/msigdb/cards/KEGG_NOD_LIKE_RECEPTOR_SIGNALING_PATHWAY	42	0.418112330895917	0.728534671606373	1
Heart	Arteria	c2.cp.kegg	KEGG_RIG_I_LIKE_RECEPTOR_SIGNALING_PATHWAY	http://www.gsea-msigdb.org/gsea/msigdb/cards/KEGG_RIG_I_LIKE_RECEPTOR_SIGNALING_PATHWAY	42	0	1	1
iPSC-CVPC	Arteria	c2.cp.kegg	KEGG_CYTOSOLIC_DNA_SENSING_PATHWAY	http://www.gsea-msigdb.org/gsea/msigdb/cards/KEGG_CYTOSOLIC_DNA_SENSING_PATHWAY	30	0.591808830738426	1	1
iPSC-CVPC	Heart	c2.cp.kegg	KEGG_JAK_STAT_SIGNALING_PATHWAY	http://www.gsea-msigdb.org/gsea/msigdb/cards/KEGG_JAK_STAT_SIGNALING_PATHWAY	73	0.812946995439881	1	1
iPSC-CVPC	Arteria	c2.cp.kegg	KEGG_JAK_STAT_SIGNALING_PATHWAY	http://www.gsea-msigdb.org/gsea/msigdb/cards/KEGG_JAK_STAT_SIGNALING_PATHWAY	73	1.26563339403524	0.60076735646274	1
Heart	Arteria	c2.cp.kegg	KEGG_JAK_STAT_SIGNALING_PATHWAY	http://www.gsea-msigdb.org/gsea/msigdb/cards/KEGG_JAK_STAT_SIGNALING_PATHWAY	73	0	1	1
iPSC-CVPC	Heart	c2.cp.kegg	KEGG_HEMATOPOIETIC_CELL_LINEAGE	http://www.gsea-msigdb.org/gsea/msigdb/cards/KEGG_HEMATOPOIETIC_CELL_LINEAGE	31	0	0.625805960900139	1
iPSC-CVPC	Arteria	c2.cp.kegg	KEGG_HEMATOPOIETIC_CELL_LINEAGE	http://www.gsea-msigdb.org/gsea/msigdb/cards/KEGG_HEMATOPOIETIC_CELL_LINEAGE	31	1.18559574515441	0.687480411644717	1
Heart	Arteria	c2.cp.kegg	KEGG_HEMATOPOIETIC_CELL_LINEAGE	http://www.gsea-msigdb.org/gsea/msigdb/cards/KEGG_HEMATOPOIETIC_CELL_LINEAGE	31	3.3768144639176	0.264289770769845	1
iPSC-CVPC	Heart	c2.cp.kegg	KEGG_NATURAL_KILLER_CELL_MEDIATED_CYTOTOXICITY	http://www.gsea-msigdb.org/gsea/msigdb/cards/KEGG_NATURAL_KILLER_CELL_MEDIATED_CYTOTOXICITY	59	0	0.268061277521739	1
iPSC-CVPC	Arteria	c2.cp.kegg	KEGG_NATURAL_KILLER_CELL_MEDIATED_CYTOTOXICITY	http://www.gsea-msigdb.org/gsea/msigdb/cards/KEGG_NATURAL_KILLER_CELL_MEDIATED_CYTOTOXICITY	59	0.920076767066092	1	1
Heart	Arteria	c2.cp.kegg	KEGG_NATURAL_KILLER_CELL_MEDIATED_CYTOTOXICITY	http://www.gsea-msigdb.org/gsea/msigdb/cards/KEGG_NATURAL_KILLER_CELL_MEDIATED_CYTOTOXICITY	59	0	1	1
Heart	Arteria	c2.cp.kegg	KEGG_FC_GAMMA_R_MEDIATED_PHAGOCYTOSIS	http://www.gsea-msigdb.org/gsea/msigdb/cards/KEGG_FC_GAMMA_R_MEDIATED_PHAGOCYTOSIS	64	1.6032181636471	0.469867320202464	1
Heart	Arteria	c2.cp.kegg	KEGG_LEUKOCYTE_TRANSENDOTHELIAL_MIGRATION	http://www.gsea-msigdb.org/gsea/msigdb/cards/KEGG_LEUKOCYTE_TRANSENDOTHELIAL_MIGRATION	67	3.13690655587413	0.140773964482099	1
iPSC-CVPC	Heart	c2.cp.kegg	KEGG_INTESTINAL_IMMUNE_NETWORK_FOR_IGA_PRODUCTION	http://www.gsea-msigdb.org/gsea/msigdb/cards/KEGG_INTESTINAL_IMMUNE_NETWORK_FOR_IGA_PRODUCTION	19	1.60694629932077	0.476362698078548	1
iPSC-CVPC	Arteria	c2.cp.kegg	KEGG_INTESTINAL_IMMUNE_NETWORK_FOR_IGA_PRODUCTION	http://www.gsea-msigdb.org/gsea/msigdb/cards/KEGG_INTESTINAL_IMMUNE_NETWORK_FOR_IGA_PRODUCTION	19	0	0.622201972793475	1
Heart	Arteria	c2.cp.kegg	KEGG_INTESTINAL_IMMUNE_NETWORK_FOR_IGA_PRODUCTION	http://www.gsea-msigdb.org/gsea/msigdb/cards/KEGG_INTESTINAL_IMMUNE_NETWORK_FOR_IGA_PRODUCTION	19	0	1	1
iPSC-CVPC	Heart	c2.cp.kegg	KEGG_TYPE_I_DIABETES_MELLITUS	http://www.gsea-msigdb.org/gsea/msigdb/cards/KEGG_TYPE_I_DIABETES_MELLITUS	15	0	1	1
iPSC-CVPC	Arteria	c2.cp.kegg	KEGG_TYPE_I_DIABETES_MELLITUS	http://www.gsea-msigdb.org/gsea/msigdb/cards/KEGG_TYPE_I_DIABETES_MELLITUS	15	1.22766633681219	0.572202813746029	1
Heart	Arteria	c2.cp.kegg	KEGG_TYPE_I_DIABETES_MELLITUS	http://www.gsea-msigdb.org/gsea/msigdb/cards/KEGG_TYPE_I_DIABETES_MELLITUS	15	0	1	1
iPSC-CVPC	Arteria	c2.cp.kegg	KEGG_ALZHEIMERS_DISEASE	http://www.gsea-msigdb.org/gsea/msigdb/cards/KEGG_ALZHEIMERS_DISEASE	79	1.16232936200353	0.622983630862924	1
Heart	Arteria	c2.cp.kegg	KEGG_ALZHEIMERS_DISEASE	http://www.gsea-msigdb.org/gsea/msigdb/cards/KEGG_ALZHEIMERS_DISEASE	79	4.0595893959358	0.0427297896350565	1
iPSC-CVPC	Heart	c2.cp.kegg	KEGG_PARKINSONS_DISEASE	http://www.gsea-msigdb.org/gsea/msigdb/cards/KEGG_PARKINSONS_DISEASE	50	2.52933832209231	0.0853127825304861	1
iPSC-CVPC	Arteria	c2.cp.kegg	KEGG_PARKINSONS_DISEASE	http://www.gsea-msigdb.org/gsea/msigdb/cards/KEGG_PARKINSONS_DISEASE	50	1.09721354958305	0.754453860235426	1
Heart	Arteria	c2.cp.kegg	KEGG_PARKINSONS_DISEASE	http://www.gsea-msigdb.org/gsea/msigdb/cards/KEGG_PARKINSONS_DISEASE	50	9.05202441935053	0.00143891477171031	0.387579687731125
iPSC-CVPC	Arteria	c2.cp.kegg	KEGG_HUNTINGTONS_DISEASE	http://www.gsea-msigdb.org/gsea/msigdb/cards/KEGG_HUNTINGTONS_DISEASE	88	0.604421152212939	0.634285005368104	1
Heart	Arteria	c2.cp.kegg	KEGG_HUNTINGTONS_DISEASE	http://www.gsea-msigdb.org/gsea/msigdb/cards/KEGG_HUNTINGTONS_DISEASE	88	4.94095873631809	0.0109676130111622	0.994551900062077
iPSC-CVPC	Heart	c2.cp.kegg	KEGG_LEISHMANIA_INFECTION	http://www.gsea-msigdb.org/gsea/msigdb/cards/KEGG_LEISHMANIA_INFECTION	43	0	0.404021604519162	1
iPSC-CVPC	Arteria	c2.cp.kegg	KEGG_LEISHMANIA_INFECTION	http://www.gsea-msigdb.org/gsea/msigdb/cards/KEGG_LEISHMANIA_INFECTION	43	1.76739064390517	0.297236671592378	1
Heart	Arteria	c2.cp.kegg	KEGG_LEISHMANIA_INFECTION	http://www.gsea-msigdb.org/gsea/msigdb/cards/KEGG_LEISHMANIA_INFECTION	43	2.40963861224833	0.346862467938942	1
iPSC-CVPC	Heart	c2.cp.kegg	KEGG_BASAL_CELL_CARCINOMA	http://www.gsea-msigdb.org/gsea/msigdb/cards/KEGG_BASAL_CELL_CARCINOMA	23	0	1	1
iPSC-CVPC	Arteria	c2.cp.kegg	KEGG_BASAL_CELL_CARCINOMA	http://www.gsea-msigdb.org/gsea/msigdb/cards/KEGG_BASAL_CELL_CARCINOMA	23	0	0.635294981278317	1
Heart	Arteria	c2.cp.kegg	KEGG_CHRONIC_MYELOID_LEUKEMIA	http://www.gsea-msigdb.org/gsea/msigdb/cards/KEGG_CHRONIC_MYELOID_LEUKEMIA	58	0	1	1
iPSC-CVPC	Heart	c2.cp.kegg	KEGG_ASTHMA	http://www.gsea-msigdb.org/gsea/msigdb/cards/KEGG_ASTHMA	9	0	1	1
iPSC-CVPC	Arteria	c2.cp.kegg	KEGG_ASTHMA	http://www.gsea-msigdb.org/gsea/msigdb/cards/KEGG_ASTHMA	9	0	1	1
Heart	Arteria	c2.cp.kegg	KEGG_ASTHMA	http://www.gsea-msigdb.org/gsea/msigdb/cards/KEGG_ASTHMA	9	0	1	1
iPSC-CVPC	Heart	c2.cp.kegg	KEGG_AUTOIMMUNE_THYROID_DISEASE	http://www.gsea-msigdb.org/gsea/msigdb/cards/KEGG_AUTOIMMUNE_THYROID_DISEASE	14	0	1	1
iPSC-CVPC	Arteria	c2.cp.kegg	KEGG_AUTOIMMUNE_THYROID_DISEASE	http://www.gsea-msigdb.org/gsea/msigdb/cards/KEGG_AUTOIMMUNE_THYROID_DISEASE	14	1.32222215691555	0.547270630631346	1
Heart	Arteria	c2.cp.kegg	KEGG_AUTOIMMUNE_THYROID_DISEASE	http://www.gsea-msigdb.org/gsea/msigdb/cards/KEGG_AUTOIMMUNE_THYROID_DISEASE	14	0	1	1
iPSC-CVPC	Heart	c2.cp.kegg	KEGG_ALLOGRAFT_REJECTION	http://www.gsea-msigdb.org/gsea/msigdb/cards/KEGG_ALLOGRAFT_REJECTION	13	0	1	1
iPSC-CVPC	Arteria	c2.cp.kegg	KEGG_ALLOGRAFT_REJECTION	http://www.gsea-msigdb.org/gsea/msigdb/cards/KEGG_ALLOGRAFT_REJECTION	13	1.4325200938926	0.520888009781609	1
Heart	Arteria	c2.cp.kegg	KEGG_ALLOGRAFT_REJECTION	http://www.gsea-msigdb.org/gsea/msigdb/cards/KEGG_ALLOGRAFT_REJECTION	13	0	1	1
iPSC-CVPC	Heart	c2.cp.kegg	KEGG_GRAFT_VERSUS_HOST_DISEASE	http://www.gsea-msigdb.org/gsea/msigdb/cards/KEGG_GRAFT_VERSUS_HOST_DISEASE	12	0	1	1
iPSC-CVPC	Arteria	c2.cp.kegg	KEGG_GRAFT_VERSUS_HOST_DISEASE	http://www.gsea-msigdb.org/gsea/msigdb/cards/KEGG_GRAFT_VERSUS_HOST_DISEASE	12	1.56288361152648	0.492970723871524	1
Heart	Arteria	c2.cp.kegg	KEGG_GRAFT_VERSUS_HOST_DISEASE	http://www.gsea-msigdb.org/gsea/msigdb/cards/KEGG_GRAFT_VERSUS_HOST_DISEASE	12	0	1	1
iPSC-CVPC	Arteria	c2.cp.kegg	KEGG_PRIMARY_IMMUNODEFICIENCY	http://www.gsea-msigdb.org/gsea/msigdb/cards/KEGG_PRIMARY_IMMUNODEFICIENCY	13	0	1	1
Heart	Arteria	c2.cp.kegg	KEGG_PRIMARY_IMMUNODEFICIENCY	http://www.gsea-msigdb.org/gsea/msigdb/cards/KEGG_PRIMARY_IMMUNODEFICIENCY	13	0	1	1
iPSC-CVPC	Heart	c2.cp.kegg	KEGG_VIRAL_MYOCARDITIS	http://www.gsea-msigdb.org/gsea/msigdb/cards/KEGG_VIRAL_MYOCARDITIS	39	0.759773223109195	1	1
iPSC-CVPC	Arteria	c2.cp.kegg	KEGG_VIRAL_MYOCARDITIS	http://www.gsea-msigdb.org/gsea/msigdb/cards/KEGG_VIRAL_MYOCARDITIS	39	0.9285339362679	1	1
iPSC-CVPC	Heart	c2.cp.reactome	REACTOME_TRANSLATION	http://www.gsea-msigdb.org/gsea/msigdb/cards/REACTOME_TRANSLATION	145	1.70302044893593	0.155523389244869	1
iPSC-CVPC	Arteria	c2.cp.reactome	REACTOME_TRANSLATION	http://www.gsea-msigdb.org/gsea/msigdb/cards/REACTOME_TRANSLATION	145	1.56166735100118	0.140712064905377	1
Heart	Arteria	c2.cp.reactome	REACTOME_TRANSLATION	http://www.gsea-msigdb.org/gsea/msigdb/cards/REACTOME_TRANSLATION	145	0.696066538094209	1	1
iPSC-CVPC	Heart	c2.cp.reactome	REACTOME_PYRUVATE_METABOLISM_AND_CITRIC_ACID_TCA_CYCLE	http://www.gsea-msigdb.org/gsea/msigdb/cards/REACTOME_PYRUVATE_METABOLISM_AND_CITRIC_ACID_TCA_CYCLE	30	2.06981949700254	0.265486934315042	1
iPSC-CVPC	Arteria	c2.cp.reactome	REACTOME_PYRUVATE_METABOLISM_AND_CITRIC_ACID_TCA_CYCLE	http://www.gsea-msigdb.org/gsea/msigdb/cards/REACTOME_PYRUVATE_METABOLISM_AND_CITRIC_ACID_TCA_CYCLE	30	1.91370345179414	0.226766477295605	1
Heart	Arteria	c2.cp.reactome	REACTOME_PYRUVATE_METABOLISM_AND_CITRIC_ACID_TCA_CYCLE	http://www.gsea-msigdb.org/gsea/msigdb/cards/REACTOME_PYRUVATE_METABOLISM_AND_CITRIC_ACID_TCA_CYCLE	30	0	1	1
iPSC-CVPC	Heart	c2.cp.reactome	REACTOME_ACTIVATION_OF_THE_PRE_REPLICATIVE_COMPLEX	http://www.gsea-msigdb.org/gsea/msigdb/cards/REACTOME_ACTIVATION_OF_THE_PRE_REPLICATIVE_COMPLEX	18	0	1	1
iPSC-CVPC	Arteria	c2.cp.reactome	REACTOME_ACTIVATION_OF_THE_PRE_REPLICATIVE_COMPLEX	http://www.gsea-msigdb.org/gsea/msigdb/cards/REACTOME_ACTIVATION_OF_THE_PRE_REPLICATIVE_COMPLEX	18	1.01074094004007	1	1
iPSC-CVPC	Heart	c2.cp.reactome	REACTOME_PROCESSING_OF_INTRONLESS_PRE_MRNAS	http://www.gsea-msigdb.org/gsea/msigdb/cards/REACTOME_PROCESSING_OF_INTRONLESS_PRE_MRNAS	14	0	1	1
iPSC-CVPC	Heart	c2.cp.reactome	REACTOME_BASE_EXCISION_REPAIR	http://www.gsea-msigdb.org/gsea/msigdb/cards/REACTOME_BASE_EXCISION_REPAIR	45	0.65579010562985	1	1
iPSC-CVPC	Arteria	c2.cp.reactome	REACTOME_BASE_EXCISION_REPAIR	http://www.gsea-msigdb.org/gsea/msigdb/cards/REACTOME_BASE_EXCISION_REPAIR	45	0.389489440576866	0.516728140091193	1
iPSC-CVPC	Heart	c2.cp.reactome	REACTOME_SIGNALING_BY_RHO_GTPASES	http://www.gsea-msigdb.org/gsea/msigdb/cards/REACTOME_SIGNALING_BY_RHO_GTPASES	264	1.02038754932719	0.862624980411285	1
Heart	Arteria	c2.cp.reactome	REACTOME_SIGNALING_BY_RHO_GTPASES	http://www.gsea-msigdb.org/gsea/msigdb/cards/REACTOME_SIGNALING_BY_RHO_GTPASES	264	1.16146410602727	0.746017277184517	1
iPSC-CVPC	Heart	c2.cp.reactome	REACTOME_SIGNALING_BY_WNT	http://www.gsea-msigdb.org/gsea/msigdb/cards/REACTOME_SIGNALING_BY_WNT	166	0.348768109795317	0.184845599538274	1
iPSC-CVPC	Arteria	c2.cp.reactome	REACTOME_SIGNALING_BY_WNT	http://www.gsea-msigdb.org/gsea/msigdb/cards/REACTOME_SIGNALING_BY_WNT	166	1.22355084406442	0.490995965509224	1
iPSC-CVPC	Heart	c2.cp.reactome	REACTOME_DEVELOPMENTAL_BIOLOGY	http://www.gsea-msigdb.org/gsea/msigdb/cards/REACTOME_DEVELOPMENTAL_BIOLOGY	507	0.751380797922149	0.375656843816701	1
iPSC-CVPC	Arteria	c2.cp.reactome	REACTOME_DEVELOPMENTAL_BIOLOGY	http://www.gsea-msigdb.org/gsea/msigdb/cards/REACTOME_DEVELOPMENTAL_BIOLOGY	507	1.16660812211519	0.423603191278203	1
iPSC-CVPC	Arteria	c2.cp.reactome	REACTOME_CROSS_PRESENTATION_OF_SOLUBLE_EXOGENOUS_ANTIGENS_ENDOSOMES	http://www.gsea-msigdb.org/gsea/msigdb/cards/REACTOME_CROSS_PRESENTATION_OF_SOLUBLE_EXOGENOUS_ANTIGENS_ENDOSOMES	30	1.91370345179414	0.226766477295605	1
Heart	Arteria	c2.cp.reactome	REACTOME_CROSS_PRESENTATION_OF_SOLUBLE_EXOGENOUS_ANTIGENS_ENDOSOMES	http://www.gsea-msigdb.org/gsea/msigdb/cards/REACTOME_CROSS_PRESENTATION_OF_SOLUBLE_EXOGENOUS_ANTIGENS_ENDOSOMES	30	3.4934878873417	0.256959198168862	1
iPSC-CVPC	Heart	c2.cp.reactome	REACTOME_G0_AND_EARLY_G1	http://www.gsea-msigdb.org/gsea/msigdb/cards/REACTOME_G0_AND_EARLY_G1	19	1.60694629932077	0.476362698078548	1
iPSC-CVPC	Arteria	c2.cp.reactome	REACTOME_G0_AND_EARLY_G1	http://www.gsea-msigdb.org/gsea/msigdb/cards/REACTOME_G0_AND_EARLY_G1	19	3.23247085619889	0.0832720913840767	1
iPSC-CVPC	Heart	c2.cp.reactome	REACTOME_MEMBRANE_TRAFFICKING	http://www.gsea-msigdb.org/gsea/msigdb/cards/REACTOME_MEMBRANE_TRAFFICKING	415	1.49050714890695	0.0937624699809068	1
iPSC-CVPC	Arteria	c2.cp.reactome	REACTOME_MEMBRANE_TRAFFICKING	http://www.gsea-msigdb.org/gsea/msigdb/cards/REACTOME_MEMBRANE_TRAFFICKING	415	1.00847606778854	0.912705009221735	1
iPSC-CVPC	Heart	c2.cp.reactome	REACTOME_IMMUNOREGULATORY_INTERACTIONS_BETWEEN_A_LYMPHOID_AND_A_NON_LYMPHOID_CELL	http://www.gsea-msigdb.org/gsea/msigdb/cards/REACTOME_IMMUNOREGULATORY_INTERACTIONS_BETWEEN_A_LYMPHOID_AND_A_NON_LYMPHOID_CELL	51	0.576761747044604	1	1
iPSC-CVPC	Arteria	c2.cp.reactome	REACTOME_IMMUNOREGULATORY_INTERACTIONS_BETWEEN_A_LYMPHOID_AND_A_NON_LYMPHOID_CELL	http://www.gsea-msigdb.org/gsea/msigdb/cards/REACTOME_IMMUNOREGULATORY_INTERACTIONS_BETWEEN_A_LYMPHOID_AND_A_NON_LYMPHOID_CELL	51	2.30408121616521	0.0596519151390868	1
Heart	Arteria	c2.cp.reactome	REACTOME_IMMUNOREGULATORY_INTERACTIONS_BETWEEN_A_LYMPHOID_AND_A_NON_LYMPHOID_CELL	http://www.gsea-msigdb.org/gsea/msigdb/cards/REACTOME_IMMUNOREGULATORY_INTERACTIONS_BETWEEN_A_LYMPHOID_AND_A_NON_LYMPHOID_CELL	51	2.02249827275683	0.396740815076136	1
iPSC-CVPC	Heart	c2.cp.reactome	REACTOME_RESOLUTION_OF_AP_SITES_VIA_THE_MULTIPLE_NUCLEOTIDE_PATCH_REPLACEMENT_PATHWAY	http://www.gsea-msigdb.org/gsea/msigdb/cards/REACTOME_RESOLUTION_OF_AP_SITES_VIA_THE_MULTIPLE_NUCLEOTIDE_PATCH_REPLACEMENT_PATHWAY	19	0	1	1
iPSC-CVPC	Arteria	c2.cp.reactome	REACTOME_RESOLUTION_OF_AP_SITES_VIA_THE_MULTIPLE_NUCLEOTIDE_PATCH_REPLACEMENT_PATHWAY	http://www.gsea-msigdb.org/gsea/msigdb/cards/REACTOME_RESOLUTION_OF_AP_SITES_VIA_THE_MULTIPLE_NUCLEOTIDE_PATCH_REPLACEMENT_PATHWAY	19	0	0.622201972793475	1
iPSC-CVPC	Heart	c2.cp.reactome	REACTOME_CELL_CYCLE	http://www.gsea-msigdb.org/gsea/msigdb/cards/REACTOME_CELL_CYCLE	422	1.3826685055467	0.167818982531948	1
iPSC-CVPC	Arteria	c2.cp.reactome	REACTOME_CELL_CYCLE	http://www.gsea-msigdb.org/gsea/msigdb/cards/REACTOME_CELL_CYCLE	422	1.69498915637649	0.00444056288451288	0.708211351620797
iPSC-CVPC	Heart	c2.cp.reactome	REACTOME_ORC1_REMOVAL_FROM_CHROMATIN	http://www.gsea-msigdb.org/gsea/msigdb/cards/REACTOME_ORC1_REMOVAL_FROM_CHROMATIN	44	1.37806967382688	0.658822768357992	1
iPSC-CVPC	Arteria	c2.cp.reactome	REACTOME_ORC1_REMOVAL_FROM_CHROMATIN	http://www.gsea-msigdb.org/gsea/msigdb/cards/REACTOME_ORC1_REMOVAL_FROM_CHROMATIN	44	2.21289032205286	0.0922174909593238	1
Heart	Arteria	c2.cp.reactome	REACTOME_ORC1_REMOVAL_FROM_CHROMATIN	http://www.gsea-msigdb.org/gsea/msigdb/cards/REACTOME_ORC1_REMOVAL_FROM_CHROMATIN	44	2.35317084278652	0.353313967550082	1
iPSC-CVPC	Heart	c2.cp.reactome	REACTOME_ANTIVIRAL_MECHANISM_BY_IFN_STIMULATED_GENES	http://www.gsea-msigdb.org/gsea/msigdb/cards/REACTOME_ANTIVIRAL_MECHANISM_BY_IFN_STIMULATED_GENES	55	0.53383236090904	1	1
iPSC-CVPC	Heart	c2.cp.reactome	REACTOME_DEFENSINS	http://www.gsea-msigdb.org/gsea/msigdb/cards/REACTOME_DEFENSINS	4	0	1	1
iPSC-CVPC	Arteria	c2.cp.reactome	REACTOME_DEFENSINS	http://www.gsea-msigdb.org/gsea/msigdb/cards/REACTOME_DEFENSINS	4	5.73347995452449	0.202527703020063	1
iPSC-CVPC	Arteria	c2.cp.reactome	REACTOME_BETA_DEFENSINS	http://www.gsea-msigdb.org/gsea/msigdb/cards/REACTOME_BETA_DEFENSINS	3	8.60080469666007	0.156101417358333	1
iPSC-CVPC	Heart	c2.cp.reactome	REACTOME_SRP_DEPENDENT_COTRANSLATIONAL_PROTEIN_TARGETING_TO_MEMBRANE	http://www.gsea-msigdb.org/gsea/msigdb/cards/REACTOME_SRP_DEPENDENT_COTRANSLATIONAL_PROTEIN_TARGETING_TO_MEMBRANE	39	2.41962626578614	0.140833554264071	1
iPSC-CVPC	Arteria	c2.cp.reactome	REACTOME_SRP_DEPENDENT_COTRANSLATIONAL_PROTEIN_TARGETING_TO_MEMBRANE	http://www.gsea-msigdb.org/gsea/msigdb/cards/REACTOME_SRP_DEPENDENT_COTRANSLATIONAL_PROTEIN_TARGETING_TO_MEMBRANE	39	1.97014644118926	0.164828111903576	1
Heart	Arteria	c2.cp.reactome	REACTOME_SRP_DEPENDENT_COTRANSLATIONAL_PROTEIN_TARGETING_TO_MEMBRANE	http://www.gsea-msigdb.org/gsea/msigdb/cards/REACTOME_SRP_DEPENDENT_COTRANSLATIONAL_PROTEIN_TARGETING_TO_MEMBRANE	39	0	1	1
iPSC-CVPC	Arteria	c2.cp.reactome	REACTOME_DEGRADATION_OF_THE_EXTRACELLULAR_MATRIX	http://www.gsea-msigdb.org/gsea/msigdb/cards/REACTOME_DEGRADATION_OF_THE_EXTRACELLULAR_MATRIX	80	2.19611432952255	0.0416327847964653	1
Heart	Arteria	c2.cp.reactome	REACTOME_DEGRADATION_OF_THE_EXTRACELLULAR_MATRIX	http://www.gsea-msigdb.org/gsea/msigdb/cards/REACTOME_DEGRADATION_OF_THE_EXTRACELLULAR_MATRIX	80	0	1	1
iPSC-CVPC	Arteria	c2.cp.reactome	REACTOME_MITOCHONDRIAL_PROTEIN_IMPORT	http://www.gsea-msigdb.org/gsea/msigdb/cards/REACTOME_MITOCHONDRIAL_PROTEIN_IMPORT	40	0	0.17020906939222	1
Heart	Arteria	c2.cp.reactome	REACTOME_MITOCHONDRIAL_PROTEIN_IMPORT	http://www.gsea-msigdb.org/gsea/msigdb/cards/REACTOME_MITOCHONDRIAL_PROTEIN_IMPORT	40	8.36676131159588	0.00701986171607646	0.83147632437032
iPSC-CVPC	Heart	c2.cp.reactome	REACTOME_SIGNALING_BY_HIPPO	http://www.gsea-msigdb.org/gsea/msigdb/cards/REACTOME_SIGNALING_BY_HIPPO	16	0	1	1
iPSC-CVPC	Heart	c2.cp.reactome	REACTOME_SIGNALING_BY_NOTCH4	http://www.gsea-msigdb.org/gsea/msigdb/cards/REACTOME_SIGNALING_BY_NOTCH4	55	2.28061011312283	0.111370123423125	1
iPSC-CVPC	Arteria	c2.cp.reactome	REACTOME_SIGNALING_BY_NOTCH4	http://www.gsea-msigdb.org/gsea/msigdb/cards/REACTOME_SIGNALING_BY_NOTCH4	55	1.72428105482497	0.227884274292582	1
iPSC-CVPC	Arteria	c2.cp.reactome	REACTOME_DOWNSTREAM_SIGNALING_EVENTS_OF_B_CELL_RECEPTOR_BCR	http://www.gsea-msigdb.org/gsea/msigdb/cards/REACTOME_DOWNSTREAM_SIGNALING_EVENTS_OF_B_CELL_RECEPTOR_BCR	53	1.40533120793185	0.53602381701741	1
iPSC-CVPC	Arteria	c2.cp.reactome	REACTOME_YAP1_AND_WWTR1_TAZ_STIMULATED_GENE_EXPRESSION	http://www.gsea-msigdb.org/gsea/msigdb/cards/REACTOME_YAP1_AND_WWTR1_TAZ_STIMULATED_GENE_EXPRESSION	13	0	1	1
iPSC-CVPC	Arteria	c2.cp.reactome	REACTOME_EXTRACELLULAR_MATRIX_ORGANIZATION	http://www.gsea-msigdb.org/gsea/msigdb/cards/REACTOME_EXTRACELLULAR_MATRIX_ORGANIZATION	184	1.65413441935245	0.0698121139598797	1
Heart	Arteria	c2.cp.reactome	REACTOME_EXTRACELLULAR_MATRIX_ORGANIZATION	http://www.gsea-msigdb.org/gsea/msigdb/cards/REACTOME_EXTRACELLULAR_MATRIX_ORGANIZATION	184	1.68773114118402	0.430988221991903	1
iPSC-CVPC	Heart	c2.cp.reactome	REACTOME_CELL_SURFACE_INTERACTIONS_AT_THE_VASCULAR_WALL	http://www.gsea-msigdb.org/gsea/msigdb/cards/REACTOME_CELL_SURFACE_INTERACTIONS_AT_THE_VASCULAR_WALL	76	0	0.18502122280429	1
iPSC-CVPC	Arteria	c2.cp.reactome	REACTOME_CELL_SURFACE_INTERACTIONS_AT_THE_VASCULAR_WALL	http://www.gsea-msigdb.org/gsea/msigdb/cards/REACTOME_CELL_SURFACE_INTERACTIONS_AT_THE_VASCULAR_WALL	76	0.954263273462525	1	1
Heart	Arteria	c2.cp.reactome	REACTOME_CELL_SURFACE_INTERACTIONS_AT_THE_VASCULAR_WALL	http://www.gsea-msigdb.org/gsea/msigdb/cards/REACTOME_CELL_SURFACE_INTERACTIONS_AT_THE_VASCULAR_WALL	76	2.75313249451819	0.171755670911487	1
Heart	Arteria	c2.cp.reactome	REACTOME_COLLAGEN_FORMATION	http://www.gsea-msigdb.org/gsea/msigdb/cards/REACTOME_COLLAGEN_FORMATION	60	0	1	1
Heart	Arteria	c2.cp.reactome	REACTOME_HS_GAG_DEGRADATION	http://www.gsea-msigdb.org/gsea/msigdb/cards/REACTOME_HS_GAG_DEGRADATION	17	0	1	1
iPSC-CVPC	Heart	c2.cp.reactome	REACTOME_HS_GAG_BIOSYNTHESIS	http://www.gsea-msigdb.org/gsea/msigdb/cards/REACTOME_HS_GAG_BIOSYNTHESIS	16	1.92888173685684	0.419999940957385	1
Heart	Arteria	c2.cp.reactome	REACTOME_KERATAN_SULFATE_DEGRADATION	http://www.gsea-msigdb.org/gsea/msigdb/cards/REACTOME_KERATAN_SULFATE_DEGRADATION	9	0	1	1
iPSC-CVPC	Heart	c2.cp.reactome	REACTOME_MICRORNA_MIRNA_BIOGENESIS	http://www.gsea-msigdb.org/gsea/msigdb/cards/REACTOME_MICRORNA_MIRNA_BIOGENESIS	15	0	1	1
iPSC-CVPC	Arteria	c2.cp.reactome	REACTOME_MICRORNA_MIRNA_BIOGENESIS	http://www.gsea-msigdb.org/gsea/msigdb/cards/REACTOME_MICRORNA_MIRNA_BIOGENESIS	15	0	1	1
iPSC-CVPC	Heart	c2.cp.reactome	REACTOME_PROCESSING_OF_CAPPED_INTRON_CONTAINING_PRE_MRNA	http://www.gsea-msigdb.org/gsea/msigdb/cards/REACTOME_PROCESSING_OF_CAPPED_INTRON_CONTAINING_PRE_MRNA	171	2.22172280991013	0.0150974198021511	1
iPSC-CVPC	Arteria	c2.cp.reactome	REACTOME_PROCESSING_OF_CAPPED_INTRON_CONTAINING_PRE_MRNA	http://www.gsea-msigdb.org/gsea/msigdb/cards/REACTOME_PROCESSING_OF_CAPPED_INTRON_CONTAINING_PRE_MRNA	171	2.45735472674337	0.000505055634603488	0.224139418469223
Heart	Arteria	c2.cp.reactome	REACTOME_REGULATION_OF_PYRUVATE_DEHYDROGENASE_PDH_COMPLEX	http://www.gsea-msigdb.org/gsea/msigdb/cards/REACTOME_REGULATION_OF_PYRUVATE_DEHYDROGENASE_PDH_COMPLEX	10	0	1	1
iPSC-CVPC	Heart	c2.cp.reactome	REACTOME_ACTIVATION_OF_THE_MRNA_UPON_BINDING_OF_THE_CAP_BINDING_COMPLEX_AND_EIFS_AND_SUBSEQUENT_BINDING_TO_43S	http://www.gsea-msigdb.org/gsea/msigdb/cards/REACTOME_ACTIVATION_OF_THE_MRNA_UPON_BINDING_OF_THE_CAP_BINDING_COMPLEX_AND_EIFS_AND_SUBSEQUENT_BINDING_TO_43S	25	1.20456327569562	0.573226453847344	1
iPSC-CVPC	Arteria	c2.cp.reactome	REACTOME_ACTIVATION_OF_THE_MRNA_UPON_BINDING_OF_THE_CAP_BINDING_COMPLEX_AND_EIFS_AND_SUBSEQUENT_BINDING_TO_43S	http://www.gsea-msigdb.org/gsea/msigdb/cards/REACTOME_ACTIVATION_OF_THE_MRNA_UPON_BINDING_OF_THE_CAP_BINDING_COMPLEX_AND_EIFS_AND_SUBSEQUENT_BINDING_TO_43S	25	3.2877661119532	0.0456829124912044	1
Heart	Arteria	c2.cp.reactome	REACTOME_ACTIVATION_OF_THE_MRNA_UPON_BINDING_OF_THE_CAP_BINDING_COMPLEX_AND_EIFS_AND_SUBSEQUENT_BINDING_TO_43S	http://www.gsea-msigdb.org/gsea/msigdb/cards/REACTOME_ACTIVATION_OF_THE_MRNA_UPON_BINDING_OF_THE_CAP_BINDING_COMPLEX_AND_EIFS_AND_SUBSEQUENT_BINDING_TO_43S	25	0	1	1
iPSC-CVPC	Heart	c2.cp.reactome	REACTOME_GENERATION_OF_SECOND_MESSENGER_MOLECULES	http://www.gsea-msigdb.org/gsea/msigdb/cards/REACTOME_GENERATION_OF_SECOND_MESSENGER_MOLECULES	17	0	1	1
iPSC-CVPC	Arteria	c2.cp.reactome	REACTOME_GENERATION_OF_SECOND_MESSENGER_MOLECULES	http://www.gsea-msigdb.org/gsea/msigdb/cards/REACTOME_GENERATION_OF_SECOND_MESSENGER_MOLECULES	17	1.07398001056137	0.618029952569981	1
Heart	Arteria	c2.cp.reactome	REACTOME_GENERATION_OF_SECOND_MESSENGER_MOLECULES	http://www.gsea-msigdb.org/gsea/msigdb/cards/REACTOME_GENERATION_OF_SECOND_MESSENGER_MOLECULES	17	0	1	1
iPSC-CVPC	Heart	c2.cp.reactome	REACTOME_RESPONSE_TO_ELEVATED_PLATELET_CYTOSOLIC_CA2	http://www.gsea-msigdb.org/gsea/msigdb/cards/REACTOME_RESPONSE_TO_ELEVATED_PLATELET_CYTOSOLIC_CA2	75	2.5384268262313	0.0391895384266031	1
iPSC-CVPC	Arteria	c2.cp.reactome	REACTOME_RESPONSE_TO_ELEVATED_PLATELET_CYTOSOLIC_CA2	http://www.gsea-msigdb.org/gsea/msigdb/cards/REACTOME_RESPONSE_TO_ELEVATED_PLATELET_CYTOSOLIC_CA2	75	0.967799208181158	1	1
iPSC-CVPC	Heart	c2.cp.reactome	REACTOME_TRANSPORT_OF_MATURE_TRANSCRIPT_TO_CYTOPLASM	http://www.gsea-msigdb.org/gsea/msigdb/cards/REACTOME_TRANSPORT_OF_MATURE_TRANSCRIPT_TO_CYTOPLASM	66	2.92142351390631	0.0226310963613139	1
iPSC-CVPC	Arteria	c2.cp.reactome	REACTOME_TRANSPORT_OF_MATURE_TRANSCRIPT_TO_CYTOPLASM	http://www.gsea-msigdb.org/gsea/msigdb/cards/REACTOME_TRANSPORT_OF_MATURE_TRANSCRIPT_TO_CYTOPLASM	66	2.05092121387605	0.0931310947277894	1
iPSC-CVPC	Heart	c2.cp.reactome	REACTOME_METABOLISM_OF_AMINO_ACIDS_AND_DERIVATIVES	http://www.gsea-msigdb.org/gsea/msigdb/cards/REACTOME_METABOLISM_OF_AMINO_ACIDS_AND_DERIVATIVES	180	1.35184578411978	0.397958792109391	1
iPSC-CVPC	Arteria	c2.cp.reactome	REACTOME_METABOLISM_OF_AMINO_ACIDS_AND_DERIVATIVES	http://www.gsea-msigdb.org/gsea/msigdb/cards/REACTOME_METABOLISM_OF_AMINO_ACIDS_AND_DERIVATIVES	180	1.46000441400227	0.184232090492685	1
iPSC-CVPC	Arteria	c2.cp.reactome	REACTOME_E2F_ENABLED_INHIBITION_OF_PRE_REPLICATION_COMPLEX_FORMATION	http://www.gsea-msigdb.org/gsea/msigdb/cards/REACTOME_E2F_ENABLED_INHIBITION_OF_PRE_REPLICATION_COMPLEX_FORMATION	5	4.30013123953848	0.246404002422746	1
iPSC-CVPC	Arteria	c2.cp.reactome	REACTOME_INTEGRIN_CELL_SURFACE_INTERACTIONS	http://www.gsea-msigdb.org/gsea/msigdb/cards/REACTOME_INTEGRIN_CELL_SURFACE_INTERACTIONS	61	1.53862289854316	0.387205663746458	1
iPSC-CVPC	Heart	c2.cp.reactome	REACTOME_SLBP_DEPENDENT_PROCESSING_OF_REPLICATION_DEPENDENT_HISTONE_PRE_MRNAS	http://www.gsea-msigdb.org/gsea/msigdb/cards/REACTOME_SLBP_DEPENDENT_PROCESSING_OF_REPLICATION_DEPENDENT_HISTONE_PRE_MRNAS	6	0	1	1
iPSC-CVPC	Arteria	c2.cp.reactome	REACTOME_SLBP_DEPENDENT_PROCESSING_OF_REPLICATION_DEPENDENT_HISTONE_PRE_MRNAS	http://www.gsea-msigdb.org/gsea/msigdb/cards/REACTOME_SLBP_DEPENDENT_PROCESSING_OF_REPLICATION_DEPENDENT_HISTONE_PRE_MRNAS	6	0	1	1
iPSC-CVPC	Heart	c2.cp.reactome	REACTOME_RNA_POLYMERASE_II_TRANSCRIPTION	http://www.gsea-msigdb.org/gsea/msigdb/cards/REACTOME_RNA_POLYMERASE_II_TRANSCRIPTION	870	1.03495400604133	0.843902117559071	1
iPSC-CVPC	Arteria	c2.cp.reactome	REACTOME_RNA_POLYMERASE_II_TRANSCRIPTION	http://www.gsea-msigdb.org/gsea/msigdb/cards/REACTOME_RNA_POLYMERASE_II_TRANSCRIPTION	870	1.00364260968524	0.938269597654917	1
iPSC-CVPC	Arteria	c2.cp.reactome	REACTOME_NEURONAL_SYSTEM	http://www.gsea-msigdb.org/gsea/msigdb/cards/REACTOME_NEURONAL_SYSTEM	182	0.581485983766516	0.248492703264481	1
Heart	Arteria	c2.cp.reactome	REACTOME_P75_NTR_RECEPTOR_MEDIATED_SIGNALLING	http://www.gsea-msigdb.org/gsea/msigdb/cards/REACTOME_P75_NTR_RECEPTOR_MEDIATED_SIGNALLING	80	1.27661989624482	0.547915473629798	1
iPSC-CVPC	Heart	c2.cp.reactome	REACTOME_GLYCOLYSIS	http://www.gsea-msigdb.org/gsea/msigdb/cards/REACTOME_GLYCOLYSIS	46	0.641155298706426	1	1
iPSC-CVPC	Arteria	c2.cp.reactome	REACTOME_GLYCOLYSIS	http://www.gsea-msigdb.org/gsea/msigdb/cards/REACTOME_GLYCOLYSIS	46	1.64066732118503	0.319320201175764	1
iPSC-CVPC	Heart	c2.cp.reactome	REACTOME_PROCESSIVE_SYNTHESIS_ON_THE_LAGGING_STRAND	http://www.gsea-msigdb.org/gsea/msigdb/cards/REACTOME_PROCESSIVE_SYNTHESIS_ON_THE_LAGGING_STRAND	7	0	1	1
iPSC-CVPC	Arteria	c2.cp.reactome	REACTOME_PROCESSIVE_SYNTHESIS_ON_THE_LAGGING_STRAND	http://www.gsea-msigdb.org/gsea/msigdb/cards/REACTOME_PROCESSIVE_SYNTHESIS_ON_THE_LAGGING_STRAND	7	0	1	1
iPSC-CVPC	Heart	c2.cp.reactome	REACTOME_MRNA_CAPPING	http://www.gsea-msigdb.org/gsea/msigdb/cards/REACTOME_MRNA_CAPPING	17	0	1	1
iPSC-CVPC	Arteria	c2.cp.reactome	REACTOME_MRNA_CAPPING	http://www.gsea-msigdb.org/gsea/msigdb/cards/REACTOME_MRNA_CAPPING	17	2.29512503823533	0.239511670216042	1
Heart	Arteria	c2.cp.reactome	REACTOME_MITOCHONDRIAL_FATTY_ACID_BETA_OXIDATION	http://www.gsea-msigdb.org/gsea/msigdb/cards/REACTOME_MITOCHONDRIAL_FATTY_ACID_BETA_OXIDATION	26	0	1	1
iPSC-CVPC	Arteria	c2.cp.reactome	REACTOME_SIGNALING_BY_GPCR	http://www.gsea-msigdb.org/gsea/msigdb/cards/REACTOME_SIGNALING_BY_GPCR	274	0.782533367185997	0.501577067046673	1
Heart	Arteria	c2.cp.reactome	REACTOME_SIGNALING_BY_GPCR	http://www.gsea-msigdb.org/gsea/msigdb/cards/REACTOME_SIGNALING_BY_GPCR	274	1.5104247762189	0.347966320160077	1
iPSC-CVPC	Heart	c2.cp.reactome	REACTOME_PEPTIDE_LIGAND_BINDING_RECEPTORS	http://www.gsea-msigdb.org/gsea/msigdb/cards/REACTOME_PEPTIDE_LIGAND_BINDING_RECEPTORS	40	0	0.64457033172966	1
iPSC-CVPC	Arteria	c2.cp.reactome	REACTOME_PEPTIDE_LIGAND_BINDING_RECEPTORS	http://www.gsea-msigdb.org/gsea/msigdb/cards/REACTOME_PEPTIDE_LIGAND_BINDING_RECEPTORS	40	0	0.17020906939222	1
iPSC-CVPC	Arteria	c2.cp.reactome	REACTOME_METABOLISM_OF_POLYAMINES	http://www.gsea-msigdb.org/gsea/msigdb/cards/REACTOME_METABOLISM_OF_POLYAMINES	37	1.51864266546769	0.455835113424837	1
Heart	Arteria	c2.cp.reactome	REACTOME_METABOLISM_OF_POLYAMINES	http://www.gsea-msigdb.org/gsea/msigdb/cards/REACTOME_METABOLISM_OF_POLYAMINES	37	2.81252099923391	0.306792831393806	1
Heart	Arteria	c2.cp.reactome	REACTOME_NOTCH_HLH_TRANSCRIPTION_PATHWAY	http://www.gsea-msigdb.org/gsea/msigdb/cards/REACTOME_NOTCH_HLH_TRANSCRIPTION_PATHWAY	23	0	1	1
iPSC-CVPC	Heart	c2.cp.reactome	REACTOME_CELL_CYCLE_MITOTIC	http://www.gsea-msigdb.org/gsea/msigdb/cards/REACTOME_CELL_CYCLE_MITOTIC	345	1.52246692656551	0.124662979342312	1
iPSC-CVPC	Arteria	c2.cp.reactome	REACTOME_CELL_CYCLE_MITOTIC	http://www.gsea-msigdb.org/gsea/msigdb/cards/REACTOME_CELL_CYCLE_MITOTIC	345	1.93232518748554	0.00102074980941581	0.328473675396344
iPSC-CVPC	Heart	c2.cp.reactome	REACTOME_RECRUITMENT_OF_MITOTIC_CENTROSOME_PROTEINS_AND_COMPLEXES	http://www.gsea-msigdb.org/gsea/msigdb/cards/REACTOME_RECRUITMENT_OF_MITOTIC_CENTROSOME_PROTEINS_AND_COMPLEXES	57	1.61037667504931	0.440577577850854	1
iPSC-CVPC	Heart	c2.cp.reactome	REACTOME_MITOCHONDRIAL_TRNA_AMINOACYLATION	http://www.gsea-msigdb.org/gsea/msigdb/cards/REACTOME_MITOCHONDRIAL_TRNA_AMINOACYLATION	13	0	1	1
iPSC-CVPC	Arteria	c2.cp.reactome	REACTOME_MITOCHONDRIAL_TRNA_AMINOACYLATION	http://www.gsea-msigdb.org/gsea/msigdb/cards/REACTOME_MITOCHONDRIAL_TRNA_AMINOACYLATION	13	0	1	1
Heart	Arteria	c2.cp.reactome	REACTOME_MITOCHONDRIAL_TRNA_AMINOACYLATION	http://www.gsea-msigdb.org/gsea/msigdb/cards/REACTOME_MITOCHONDRIAL_TRNA_AMINOACYLATION	13	0	1	1
iPSC-CVPC	Heart	c2.cp.reactome	REACTOME_CYTOSOLIC_TRNA_AMINOACYLATION	http://www.gsea-msigdb.org/gsea/msigdb/cards/REACTOME_CYTOSOLIC_TRNA_AMINOACYLATION	15	0	1	1
iPSC-CVPC	Arteria	c2.cp.reactome	REACTOME_CYTOSOLIC_TRNA_AMINOACYLATION	http://www.gsea-msigdb.org/gsea/msigdb/cards/REACTOME_CYTOSOLIC_TRNA_AMINOACYLATION	15	1.22766633681219	0.572202813746029	1
Heart	Arteria	c2.cp.reactome	REACTOME_CYTOSOLIC_TRNA_AMINOACYLATION	http://www.gsea-msigdb.org/gsea/msigdb/cards/REACTOME_CYTOSOLIC_TRNA_AMINOACYLATION	15	0	1	1
Heart	Arteria	c2.cp.reactome	REACTOME_DARPP_32_EVENTS	http://www.gsea-msigdb.org/gsea/msigdb/cards/REACTOME_DARPP_32_EVENTS	15	0	1	1
iPSC-CVPC	Heart	c2.cp.reactome	REACTOME_CHEMOKINE_RECEPTORS_BIND_CHEMOKINES	http://www.gsea-msigdb.org/gsea/msigdb/cards/REACTOME_CHEMOKINE_RECEPTORS_BIND_CHEMOKINES	15	0	1	1
iPSC-CVPC	Arteria	c2.cp.reactome	REACTOME_CHEMOKINE_RECEPTORS_BIND_CHEMOKINES	http://www.gsea-msigdb.org/gsea/msigdb/cards/REACTOME_CHEMOKINE_RECEPTORS_BIND_CHEMOKINES	15	0	1	1
iPSC-CVPC	Heart	c2.cp.reactome	REACTOME_CELL_CYCLE_CHECKPOINTS	http://www.gsea-msigdb.org/gsea/msigdb/cards/REACTOME_CELL_CYCLE_CHECKPOINTS	175	1.20807027684961	0.527418995973791	1
iPSC-CVPC	Arteria	c2.cp.reactome	REACTOME_CELL_CYCLE_CHECKPOINTS	http://www.gsea-msigdb.org/gsea/msigdb/cards/REACTOME_CELL_CYCLE_CHECKPOINTS	175	1.50609762012801	0.176950066896626	1
Heart	Arteria	c2.cp.reactome	REACTOME_CELL_CYCLE_CHECKPOINTS	http://www.gsea-msigdb.org/gsea/msigdb/cards/REACTOME_CELL_CYCLE_CHECKPOINTS	175	1.16671239630246	0.691096598102749	1
iPSC-CVPC	Arteria	c2.cp.reactome	REACTOME_ABC_FAMILY_PROTEINS_MEDIATED_TRANSPORT	http://www.gsea-msigdb.org/gsea/msigdb/cards/REACTOME_ABC_FAMILY_PROTEINS_MEDIATED_TRANSPORT	67	2.34800030253071	0.0298723536881094	1
Heart	Arteria	c2.cp.reactome	REACTOME_ABC_FAMILY_PROTEINS_MEDIATED_TRANSPORT	http://www.gsea-msigdb.org/gsea/msigdb/cards/REACTOME_ABC_FAMILY_PROTEINS_MEDIATED_TRANSPORT	67	1.52990293403545	0.485454078519188	1
iPSC-CVPC	Heart	c2.cp.reactome	REACTOME_TRNA_AMINOACYLATION	http://www.gsea-msigdb.org/gsea/msigdb/cards/REACTOME_TRNA_AMINOACYLATION	26	0	1	1
iPSC-CVPC	Arteria	c2.cp.reactome	REACTOME_TRNA_AMINOACYLATION	http://www.gsea-msigdb.org/gsea/msigdb/cards/REACTOME_TRNA_AMINOACYLATION	26	0.686769395472494	1	1
Heart	Arteria	c2.cp.reactome	REACTOME_TRNA_AMINOACYLATION	http://www.gsea-msigdb.org/gsea/msigdb/cards/REACTOME_TRNA_AMINOACYLATION	26	0	1	1
iPSC-CVPC	Heart	c2.cp.reactome	REACTOME_RECRUITMENT_OF_NUMA_TO_MITOTIC_CENTROSOMES	http://www.gsea-msigdb.org/gsea/msigdb/cards/REACTOME_RECRUITMENT_OF_NUMA_TO_MITOTIC_CENTROSOMES	62	1.47319386611721	0.464224886215564	1
iPSC-CVPC	Heart	c2.cp.reactome	REACTOME_NUCLEAR_RECEPTOR_TRANSCRIPTION_PATHWAY	http://www.gsea-msigdb.org/gsea/msigdb/cards/REACTOME_NUCLEAR_RECEPTOR_TRANSCRIPTION_PATHWAY	33	1.86906580513137	0.303026918666918	1
iPSC-CVPC	Arteria	c2.cp.reactome	REACTOME_FORMATION_OF_TUBULIN_FOLDING_INTERMEDIATES_BY_CCT_TRIC	http://www.gsea-msigdb.org/gsea/msigdb/cards/REACTOME_FORMATION_OF_TUBULIN_FOLDING_INTERMEDIATES_BY_CCT_TRIC	12	0	1	1
Heart	Arteria	c2.cp.reactome	REACTOME_FORMATION_OF_TUBULIN_FOLDING_INTERMEDIATES_BY_CCT_TRIC	http://www.gsea-msigdb.org/gsea/msigdb/cards/REACTOME_FORMATION_OF_TUBULIN_FOLDING_INTERMEDIATES_BY_CCT_TRIC	12	0	1	1
iPSC-CVPC	Heart	c2.cp.reactome	REACTOME_STRIATED_MUSCLE_CONTRACTION	http://www.gsea-msigdb.org/gsea/msigdb/cards/REACTOME_STRIATED_MUSCLE_CONTRACTION	24	1.25705143606399	0.558422901964669	1
Heart	Arteria	c2.cp.reactome	REACTOME_STRIATED_MUSCLE_CONTRACTION	http://www.gsea-msigdb.org/gsea/msigdb/cards/REACTOME_STRIATED_MUSCLE_CONTRACTION	24	20.8472199953663	8.07699721591589e-05	0.0611883020338228
iPSC-CVPC	Heart	c2.cp.reactome	REACTOME_MUSCLE_CONTRACTION	http://www.gsea-msigdb.org/gsea/msigdb/cards/REACTOME_MUSCLE_CONTRACTION	117	2.14624636892803	0.0605952767280921	1
Heart	Arteria	c2.cp.reactome	REACTOME_MUSCLE_CONTRACTION	http://www.gsea-msigdb.org/gsea/msigdb/cards/REACTOME_MUSCLE_CONTRACTION	117	6.78687549169103	0.000149078762875086	0.0968026974004776
iPSC-CVPC	Heart	c2.cp.reactome	REACTOME_CDC6_ASSOCIATION_WITH_THE_ORC_ORIGIN_COMPLEX	http://www.gsea-msigdb.org/gsea/msigdb/cards/REACTOME_CDC6_ASSOCIATION_WITH_THE_ORC_ORIGIN_COMPLEX	5	0	1	1
iPSC-CVPC	Arteria	c2.cp.reactome	REACTOME_CDC6_ASSOCIATION_WITH_THE_ORC_ORIGIN_COMPLEX	http://www.gsea-msigdb.org/gsea/msigdb/cards/REACTOME_CDC6_ASSOCIATION_WITH_THE_ORC_ORIGIN_COMPLEX	5	4.30013123953848	0.246404002422746	1
iPSC-CVPC	Heart	c2.cp.reactome	REACTOME_MRNA_SPLICING	http://www.gsea-msigdb.org/gsea/msigdb/cards/REACTOME_MRNA_SPLICING	132	2.6782665866934	0.00469625135376893	0.736076672315084
iPSC-CVPC	Arteria	c2.cp.reactome	REACTOME_MRNA_SPLICING	http://www.gsea-msigdb.org/gsea/msigdb/cards/REACTOME_MRNA_SPLICING	132	2.58550875275248	0.00143629719727609	0.387579687731125
iPSC-CVPC	Heart	c2.cp.reactome	REACTOME_MRNA_SPLICING_MINOR_PATHWAY	http://www.gsea-msigdb.org/gsea/msigdb/cards/REACTOME_MRNA_SPLICING_MINOR_PATHWAY	25	3.96445300020132	0.0495362440660088	1
iPSC-CVPC	Arteria	c2.cp.reactome	REACTOME_MRNA_SPLICING_MINOR_PATHWAY	http://www.gsea-msigdb.org/gsea/msigdb/cards/REACTOME_MRNA_SPLICING_MINOR_PATHWAY	25	2.34976537369778	0.155922298823391	1
iPSC-CVPC	Heart	c2.cp.reactome	REACTOME_PROCESSING_OF_CAPPED_INTRONLESS_PRE_MRNA	http://www.gsea-msigdb.org/gsea/msigdb/cards/REACTOME_PROCESSING_OF_CAPPED_INTRONLESS_PRE_MRNA	19	0	1	1
iPSC-CVPC	Arteria	c2.cp.reactome	REACTOME_PROCESSING_OF_CAPPED_INTRONLESS_PRE_MRNA	http://www.gsea-msigdb.org/gsea/msigdb/cards/REACTOME_PROCESSING_OF_CAPPED_INTRONLESS_PRE_MRNA	19	2.02475617469779	0.281157362561673	1
iPSC-CVPC	Heart	c2.cp.reactome	REACTOME_CITRIC_ACID_CYCLE_TCA_CYCLE	http://www.gsea-msigdb.org/gsea/msigdb/cards/REACTOME_CITRIC_ACID_CYCLE_TCA_CYCLE	10	3.21625307367113	0.28848373142765	1
iPSC-CVPC	Arteria	c2.cp.reactome	REACTOME_CITRIC_ACID_CYCLE_TCA_CYCLE	http://www.gsea-msigdb.org/gsea/msigdb/cards/REACTOME_CITRIC_ACID_CYCLE_TCA_CYCLE	10	1.91058868467145	0.432170553786081	1
Heart	Arteria	c2.cp.reactome	REACTOME_CITRIC_ACID_CYCLE_TCA_CYCLE	http://www.gsea-msigdb.org/gsea/msigdb/cards/REACTOME_CITRIC_ACID_CYCLE_TCA_CYCLE	10	0	1	1
iPSC-CVPC	Heart	c2.cp.reactome	REACTOME_POLYMERASE_SWITCHING	http://www.gsea-msigdb.org/gsea/msigdb/cards/REACTOME_POLYMERASE_SWITCHING	10	0	1	1
iPSC-CVPC	Arteria	c2.cp.reactome	REACTOME_POLYMERASE_SWITCHING	http://www.gsea-msigdb.org/gsea/msigdb/cards/REACTOME_POLYMERASE_SWITCHING	10	0	1	1
iPSC-CVPC	Heart	c2.cp.reactome	REACTOME_NUCLEOTIDE_EXCISION_REPAIR	http://www.gsea-msigdb.org/gsea/msigdb/cards/REACTOME_NUCLEOTIDE_EXCISION_REPAIR	84	0.703143228901997	1	1
iPSC-CVPC	Arteria	c2.cp.reactome	REACTOME_NUCLEOTIDE_EXCISION_REPAIR	http://www.gsea-msigdb.org/gsea/msigdb/cards/REACTOME_NUCLEOTIDE_EXCISION_REPAIR	84	1.08820652217681	0.808224127946481	1
Heart	Arteria	c2.cp.reactome	REACTOME_G_ALPHA_Q_SIGNALLING_EVENTS	http://www.gsea-msigdb.org/gsea/msigdb/cards/REACTOME_G_ALPHA_Q_SIGNALLING_EVENTS	74	0	1	1
iPSC-CVPC	Arteria	c2.cp.reactome	REACTOME_EICOSANOID_LIGAND_BINDING_RECEPTORS	http://www.gsea-msigdb.org/gsea/msigdb/cards/REACTOME_EICOSANOID_LIGAND_BINDING_RECEPTORS	6	0	1	1
iPSC-CVPC	Heart	c2.cp.reactome	REACTOME_FANCONI_ANEMIA_PATHWAY	http://www.gsea-msigdb.org/gsea/msigdb/cards/REACTOME_FANCONI_ANEMIA_PATHWAY	29	1.03211027703323	1	1
iPSC-CVPC	Heart	c2.cp.reactome	REACTOME_OPSINS	http://www.gsea-msigdb.org/gsea/msigdb/cards/REACTOME_OPSINS	1	0	1	1
iPSC-CVPC	Arteria	c2.cp.reactome	REACTOME_OPSINS	http://www.gsea-msigdb.org/gsea/msigdb/cards/REACTOME_OPSINS	1	0	1	1
iPSC-CVPC	Arteria	c2.cp.reactome	REACTOME_PURINE_SALVAGE	http://www.gsea-msigdb.org/gsea/msigdb/cards/REACTOME_PURINE_SALVAGE	12	0	1	1
iPSC-CVPC	Arteria	c2.cp.reactome	REACTOME_CTLA4_INHIBITORY_SIGNALING	http://www.gsea-msigdb.org/gsea/msigdb/cards/REACTOME_CTLA4_INHIBITORY_SIGNALING	13	0	1	1
Heart	Arteria	c2.cp.reactome	REACTOME_CTLA4_INHIBITORY_SIGNALING	http://www.gsea-msigdb.org/gsea/msigdb/cards/REACTOME_CTLA4_INHIBITORY_SIGNALING	13	0	1	1
iPSC-CVPC	Heart	c2.cp.reactome	REACTOME_FORMATION_OF_FIBRIN_CLOT_CLOTTING_CASCADE	http://www.gsea-msigdb.org/gsea/msigdb/cards/REACTOME_FORMATION_OF_FIBRIN_CLOT_CLOTTING_CASCADE	13	2.41165437315027	0.35758926732267	1
iPSC-CVPC	Heart	c2.cp.reactome	REACTOME_DEADENYLATION_OF_MRNA	http://www.gsea-msigdb.org/gsea/msigdb/cards/REACTOME_DEADENYLATION_OF_MRNA	20	0	1	1
iPSC-CVPC	Arteria	c2.cp.reactome	REACTOME_DEADENYLATION_OF_MRNA	http://www.gsea-msigdb.org/gsea/msigdb/cards/REACTOME_DEADENYLATION_OF_MRNA	20	1.91214338088883	0.30193731787827	1
iPSC-CVPC	Heart	c2.cp.reactome	REACTOME_MRNA_DECAY_BY_3_TO_5_EXORIBONUCLEASE	http://www.gsea-msigdb.org/gsea/msigdb/cards/REACTOME_MRNA_DECAY_BY_3_TO_5_EXORIBONUCLEASE	11	0	1	1
iPSC-CVPC	Arteria	c2.cp.reactome	REACTOME_MRNA_DECAY_BY_3_TO_5_EXORIBONUCLEASE	http://www.gsea-msigdb.org/gsea/msigdb/cards/REACTOME_MRNA_DECAY_BY_3_TO_5_EXORIBONUCLEASE	11	6.46863901294495	0.0196011811945846	1
iPSC-CVPC	Arteria	c2.cp.reactome	REACTOME_THROMBOXANE_SIGNALLING_THROUGH_TP_RECEPTOR	http://www.gsea-msigdb.org/gsea/msigdb/cards/REACTOME_THROMBOXANE_SIGNALLING_THROUGH_TP_RECEPTOR	7	0	1	1
Heart	Arteria	c2.cp.reactome	REACTOME_CELL_JUNCTION_ORGANIZATION	http://www.gsea-msigdb.org/gsea/msigdb/cards/REACTOME_CELL_JUNCTION_ORGANIZATION	55	1.87203189858851	0.420245937463217	1
iPSC-CVPC	Heart	c2.cp.reactome	REACTOME_PURINE_CATABOLISM	http://www.gsea-msigdb.org/gsea/msigdb/cards/REACTOME_PURINE_CATABOLISM	12	0	1	1
iPSC-CVPC	Arteria	c2.cp.reactome	REACTOME_PURINE_CATABOLISM	http://www.gsea-msigdb.org/gsea/msigdb/cards/REACTOME_PURINE_CATABOLISM	12	0	1	1
iPSC-CVPC	Heart	c2.cp.reactome	REACTOME_METABOLISM_OF_RNA	http://www.gsea-msigdb.org/gsea/msigdb/cards/REACTOME_METABOLISM_OF_RNA	438	1.48358133450504	0.101091764457261	1
iPSC-CVPC	Arteria	c2.cp.reactome	REACTOME_METABOLISM_OF_RNA	http://www.gsea-msigdb.org/gsea/msigdb/cards/REACTOME_METABOLISM_OF_RNA	438	2.21370976091663	4.6458190711729e-06	0.00851820604769759
iPSC-CVPC	Arteria	c2.cp.reactome	REACTOME_MAPK_TARGETS_NUCLEAR_EVENTS_MEDIATED_BY_MAP_KINASES	http://www.gsea-msigdb.org/gsea/msigdb/cards/REACTOME_MAPK_TARGETS_NUCLEAR_EVENTS_MEDIATED_BY_MAP_KINASES	20	0	0.62419150327376	1
Heart	Arteria	c2.cp.reactome	REACTOME_MAPK_TARGETS_NUCLEAR_EVENTS_MEDIATED_BY_MAP_KINASES	http://www.gsea-msigdb.org/gsea/msigdb/cards/REACTOME_MAPK_TARGETS_NUCLEAR_EVENTS_MEDIATED_BY_MAP_KINASES	20	0	1	1
iPSC-CVPC	Heart	c2.cp.reactome	REACTOME_ENERGY_DEPENDENT_REGULATION_OF_MTOR_BY_LKB1_AMPK	http://www.gsea-msigdb.org/gsea/msigdb/cards/REACTOME_ENERGY_DEPENDENT_REGULATION_OF_MTOR_BY_LKB1_AMPK	21	3.05264390354102	0.154709771700777	1
iPSC-CVPC	Arteria	c2.cp.reactome	REACTOME_ENERGY_DEPENDENT_REGULATION_OF_MTOR_BY_LKB1_AMPK	http://www.gsea-msigdb.org/gsea/msigdb/cards/REACTOME_ENERGY_DEPENDENT_REGULATION_OF_MTOR_BY_LKB1_AMPK	21	0.858882501292722	1	1
iPSC-CVPC	Heart	c2.cp.reactome	REACTOME_ACTIVATED_TAK1_MEDIATES_P38_MAPK_ACTIVATION	http://www.gsea-msigdb.org/gsea/msigdb/cards/REACTOME_ACTIVATED_TAK1_MEDIATES_P38_MAPK_ACTIVATION	16	0	1	1
iPSC-CVPC	Arteria	c2.cp.reactome	REACTOME_ACTIVATED_TAK1_MEDIATES_P38_MAPK_ACTIVATION	http://www.gsea-msigdb.org/gsea/msigdb/cards/REACTOME_ACTIVATED_TAK1_MEDIATES_P38_MAPK_ACTIVATION	16	1.14571734678302	0.595764171255043	1
iPSC-CVPC	Heart	c2.cp.reactome	REACTOME_EFFECTS_OF_PIP2_HYDROLYSIS	http://www.gsea-msigdb.org/gsea/msigdb/cards/REACTOME_EFFECTS_OF_PIP2_HYDROLYSIS	14	2.22602531482241	0.379103397863552	1
iPSC-CVPC	Arteria	c2.cp.reactome	REACTOME_EFFECTS_OF_PIP2_HYDROLYSIS	http://www.gsea-msigdb.org/gsea/msigdb/cards/REACTOME_EFFECTS_OF_PIP2_HYDROLYSIS	14	1.32222215691555	0.547270630631346	1
Heart	Arteria	c2.cp.reactome	REACTOME_EFFECTS_OF_PIP2_HYDROLYSIS	http://www.gsea-msigdb.org/gsea/msigdb/cards/REACTOME_EFFECTS_OF_PIP2_HYDROLYSIS	14	0	1	1
iPSC-CVPC	Heart	c2.cp.reactome	REACTOME_POST_TRANSLATIONAL_PROTEIN_MODIFICATION	http://www.gsea-msigdb.org/gsea/msigdb/cards/REACTOME_POST_TRANSLATIONAL_PROTEIN_MODIFICATION	862	1.16556482004977	0.428392814862949	1
iPSC-CVPC	Arteria	c2.cp.reactome	REACTOME_POST_TRANSLATIONAL_PROTEIN_MODIFICATION	http://www.gsea-msigdb.org/gsea/msigdb/cards/REACTOME_POST_TRANSLATIONAL_PROTEIN_MODIFICATION	862	0.755185049229352	0.118594575011813	1
iPSC-CVPC	Arteria	c2.cp.reactome	REACTOME_CHROMOSOME_MAINTENANCE	http://www.gsea-msigdb.org/gsea/msigdb/cards/REACTOME_CHROMOSOME_MAINTENANCE	55	0.647196787980893	0.769040369057349	1
iPSC-CVPC	Heart	c2.cp.reactome	REACTOME_RESPIRATORY_ELECTRON_TRANSPORT	http://www.gsea-msigdb.org/gsea/msigdb/cards/REACTOME_RESPIRATORY_ELECTRON_TRANSPORT	36	0.825133033539165	1	1
iPSC-CVPC	Arteria	c2.cp.reactome	REACTOME_RESPIRATORY_ELECTRON_TRANSPORT	http://www.gsea-msigdb.org/gsea/msigdb/cards/REACTOME_RESPIRATORY_ELECTRON_TRANSPORT	36	1.56481209999703	0.447671311129449	1
Heart	Arteria	c2.cp.reactome	REACTOME_RESPIRATORY_ELECTRON_TRANSPORT	http://www.gsea-msigdb.org/gsea/msigdb/cards/REACTOME_RESPIRATORY_ELECTRON_TRANSPORT	36	16.9740467036005	2.47710470900317e-05	0.0281484245417132
iPSC-CVPC	Heart	c2.cp.reactome	REACTOME_ASPARAGINE_N_LINKED_GLYCOSYLATION	http://www.gsea-msigdb.org/gsea/msigdb/cards/REACTOME_ASPARAGINE_N_LINKED_GLYCOSYLATION	206	1.01678522936566	0.845685481605433	1
iPSC-CVPC	Arteria	c2.cp.reactome	REACTOME_ASPARAGINE_N_LINKED_GLYCOSYLATION	http://www.gsea-msigdb.org/gsea/msigdb/cards/REACTOME_ASPARAGINE_N_LINKED_GLYCOSYLATION	206	0.690013773437327	0.35667806337221	1
iPSC-CVPC	Heart	c2.cp.reactome	REACTOME_ASSEMBLY_OF_THE_PRE_REPLICATIVE_COMPLEX	http://www.gsea-msigdb.org/gsea/msigdb/cards/REACTOME_ASSEMBLY_OF_THE_PRE_REPLICATIVE_COMPLEX	42	1.44723994581979	0.651371694042805	1
iPSC-CVPC	Arteria	c2.cp.reactome	REACTOME_ASSEMBLY_OF_THE_PRE_REPLICATIVE_COMPLEX	http://www.gsea-msigdb.org/gsea/msigdb/cards/REACTOME_ASSEMBLY_OF_THE_PRE_REPLICATIVE_COMPLEX	42	2.3330911506392	0.0788422172987687	1
Heart	Arteria	c2.cp.reactome	REACTOME_ASSEMBLY_OF_THE_PRE_REPLICATIVE_COMPLEX	http://www.gsea-msigdb.org/gsea/msigdb/cards/REACTOME_ASSEMBLY_OF_THE_PRE_REPLICATIVE_COMPLEX	42	2.46847361077471	0.340347225599363	1
iPSC-CVPC	Heart	c2.cp.reactome	REACTOME_REGULATION_OF_MRNA_STABILITY_BY_PROTEINS_THAT_BIND_AU_RICH_ELEMENTS	http://www.gsea-msigdb.org/gsea/msigdb/cards/REACTOME_REGULATION_OF_MRNA_STABILITY_BY_PROTEINS_THAT_BIND_AU_RICH_ELEMENTS	53	1.13392575796903	0.697589990277755	1
iPSC-CVPC	Arteria	c2.cp.reactome	REACTOME_REGULATION_OF_MRNA_STABILITY_BY_PROTEINS_THAT_BIND_AU_RICH_ELEMENTS	http://www.gsea-msigdb.org/gsea/msigdb/cards/REACTOME_REGULATION_OF_MRNA_STABILITY_BY_PROTEINS_THAT_BIND_AU_RICH_ELEMENTS	53	3.55295719721361	0.00218392774527184	0.492415558740283
Heart	Arteria	c2.cp.reactome	REACTOME_REGULATION_OF_MRNA_STABILITY_BY_PROTEINS_THAT_BIND_AU_RICH_ELEMENTS	http://www.gsea-msigdb.org/gsea/msigdb/cards/REACTOME_REGULATION_OF_MRNA_STABILITY_BY_PROTEINS_THAT_BIND_AU_RICH_ELEMENTS	53	1.94435951279165	0.408609030744784	1
iPSC-CVPC	Heart	c2.cp.reactome	REACTOME_TRANSPORT_TO_THE_GOLGI_AND_SUBSEQUENT_MODIFICATION	http://www.gsea-msigdb.org/gsea/msigdb/cards/REACTOME_TRANSPORT_TO_THE_GOLGI_AND_SUBSEQUENT_MODIFICATION	115	1.04179074574644	0.794766004008643	1
iPSC-CVPC	Arteria	c2.cp.reactome	REACTOME_TRANSPORT_TO_THE_GOLGI_AND_SUBSEQUENT_MODIFICATION	http://www.gsea-msigdb.org/gsea/msigdb/cards/REACTOME_TRANSPORT_TO_THE_GOLGI_AND_SUBSEQUENT_MODIFICATION	115	0.77914048536284	0.835666890951425	1
iPSC-CVPC	Heart	c2.cp.reactome	REACTOME_INTERFERON_GAMMA_SIGNALING	http://www.gsea-msigdb.org/gsea/msigdb/cards/REACTOME_INTERFERON_GAMMA_SIGNALING	56	2.23645609601047	0.11696295982209	1
iPSC-CVPC	Arteria	c2.cp.reactome	REACTOME_INTERFERON_GAMMA_SIGNALING	http://www.gsea-msigdb.org/gsea/msigdb/cards/REACTOME_INTERFERON_GAMMA_SIGNALING	56	2.07264419656783	0.127582650927175	1
Heart	Arteria	c2.cp.reactome	REACTOME_INTERFERON_GAMMA_SIGNALING	http://www.gsea-msigdb.org/gsea/msigdb/cards/REACTOME_INTERFERON_GAMMA_SIGNALING	56	1.83786130973383	0.425979048836957	1
iPSC-CVPC	Heart	c2.cp.reactome	REACTOME_INTERFERON_ALPHA_BETA_SIGNALING	http://www.gsea-msigdb.org/gsea/msigdb/cards/REACTOME_INTERFERON_ALPHA_BETA_SIGNALING	34	1.81037959861125	0.315477871823696	1
iPSC-CVPC	Arteria	c2.cp.reactome	REACTOME_INTERFERON_ALPHA_BETA_SIGNALING	http://www.gsea-msigdb.org/gsea/msigdb/cards/REACTOME_INTERFERON_ALPHA_BETA_SIGNALING	34	3.70865729848044	0.00970813523509184	0.969826707564958
Heart	Arteria	c2.cp.reactome	REACTOME_INTERFERON_ALPHA_BETA_SIGNALING	http://www.gsea-msigdb.org/gsea/msigdb/cards/REACTOME_INTERFERON_ALPHA_BETA_SIGNALING	34	0	1	1
iPSC-CVPC	Arteria	c2.cp.reactome	REACTOME_KINESINS	http://www.gsea-msigdb.org/gsea/msigdb/cards/REACTOME_KINESINS	27	0.660290068265155	1	1
iPSC-CVPC	Arteria	c2.cp.reactome	REACTOME_INTERFERON_SIGNALING	http://www.gsea-msigdb.org/gsea/msigdb/cards/REACTOME_INTERFERON_SIGNALING	120	1.74788841192487	0.10135404369153	1
Heart	Arteria	c2.cp.reactome	REACTOME_INTERFERON_SIGNALING	http://www.gsea-msigdb.org/gsea/msigdb/cards/REACTOME_INTERFERON_SIGNALING	120	0.844307648228786	1	1
iPSC-CVPC	Heart	c2.cp.reactome	REACTOME_FORMATION_OF_INCISION_COMPLEX_IN_GG_NER	http://www.gsea-msigdb.org/gsea/msigdb/cards/REACTOME_FORMATION_OF_INCISION_COMPLEX_IN_GG_NER	32	0.931955759651939	1	1
iPSC-CVPC	Heart	c2.cp.reactome	REACTOME_MEIOTIC_RECOMBINATION	http://www.gsea-msigdb.org/gsea/msigdb/cards/REACTOME_MEIOTIC_RECOMBINATION	25	0	1	1
iPSC-CVPC	Arteria	c2.cp.reactome	REACTOME_MEIOTIC_RECOMBINATION	http://www.gsea-msigdb.org/gsea/msigdb/cards/REACTOME_MEIOTIC_RECOMBINATION	25	0.715455254776908	1	1
Heart	Arteria	c2.cp.reactome	REACTOME_PLATELET_AGGREGATION_PLUG_FORMATION	http://www.gsea-msigdb.org/gsea/msigdb/cards/REACTOME_PLATELET_AGGREGATION_PLUG_FORMATION	20	5.33720283975796	0.179555904029851	1
iPSC-CVPC	Heart	c2.cp.reactome	REACTOME_SIGNALING_BY_NOTCH	http://www.gsea-msigdb.org/gsea/msigdb/cards/REACTOME_SIGNALING_BY_NOTCH	135	1.11296837497656	0.806839237767255	1
iPSC-CVPC	Arteria	c2.cp.reactome	REACTOME_SIGNALING_BY_NOTCH	http://www.gsea-msigdb.org/gsea/msigdb/cards/REACTOME_SIGNALING_BY_NOTCH	135	1.38101474601246	0.337563529058994	1
iPSC-CVPC	Heart	c2.cp.reactome	REACTOME_LAGGING_STRAND_SYNTHESIS	http://www.gsea-msigdb.org/gsea/msigdb/cards/REACTOME_LAGGING_STRAND_SYNTHESIS	12	0	1	1
iPSC-CVPC	Arteria	c2.cp.reactome	REACTOME_LAGGING_STRAND_SYNTHESIS	http://www.gsea-msigdb.org/gsea/msigdb/cards/REACTOME_LAGGING_STRAND_SYNTHESIS	12	0	1	1
iPSC-CVPC	Arteria	c2.cp.reactome	REACTOME_INHIBITION_OF_REPLICATION_INITIATION_OF_DAMAGED_DNA_BY_RB1_E2F1	http://www.gsea-msigdb.org/gsea/msigdb/cards/REACTOME_INHIBITION_OF_REPLICATION_INITIATION_OF_DAMAGED_DNA_BY_RB1_E2F1	7	2.86643075245736	0.32705832013432	1
iPSC-CVPC	Arteria	c2.cp.reactome	REACTOME_ETHANOL_OXIDATION	http://www.gsea-msigdb.org/gsea/msigdb/cards/REACTOME_ETHANOL_OXIDATION	4	17.222576295752	0.0168225603731435	1
iPSC-CVPC	Heart	c2.cp.reactome	REACTOME_DNA_REPLICATION	http://www.gsea-msigdb.org/gsea/msigdb/cards/REACTOME_DNA_REPLICATION	80	1.12688432015148	0.750580174798591	1
iPSC-CVPC	Arteria	c2.cp.reactome	REACTOME_DNA_REPLICATION	http://www.gsea-msigdb.org/gsea/msigdb/cards/REACTOME_DNA_REPLICATION	80	2.47949461437543	0.0119762383580927	1
Heart	Arteria	c2.cp.reactome	REACTOME_DNA_REPLICATION	http://www.gsea-msigdb.org/gsea/msigdb/cards/REACTOME_DNA_REPLICATION	80	1.27661989624482	0.547915473629798	1
iPSC-CVPC	Heart	c2.cp.reactome	REACTOME_E2F_MEDIATED_REGULATION_OF_DNA_REPLICATION	http://www.gsea-msigdb.org/gsea/msigdb/cards/REACTOME_E2F_MEDIATED_REGULATION_OF_DNA_REPLICATION	12	0	1	1
iPSC-CVPC	Arteria	c2.cp.reactome	REACTOME_E2F_MEDIATED_REGULATION_OF_DNA_REPLICATION	http://www.gsea-msigdb.org/gsea/msigdb/cards/REACTOME_E2F_MEDIATED_REGULATION_OF_DNA_REPLICATION	12	3.44407057775882	0.138477997216538	1
Heart	Arteria	c2.cp.reactome	REACTOME_E2F_MEDIATED_REGULATION_OF_DNA_REPLICATION	http://www.gsea-msigdb.org/gsea/msigdb/cards/REACTOME_E2F_MEDIATED_REGULATION_OF_DNA_REPLICATION	12	0	1	1
iPSC-CVPC	Heart	c2.cp.reactome	REACTOME_HEMOSTASIS	http://www.gsea-msigdb.org/gsea/msigdb/cards/REACTOME_HEMOSTASIS	325	1.11158456083186	0.639828382714643	1
iPSC-CVPC	Arteria	c2.cp.reactome	REACTOME_HEMOSTASIS	http://www.gsea-msigdb.org/gsea/msigdb/cards/REACTOME_HEMOSTASIS	325	1.06913434475782	0.711867102615974	1
Heart	Arteria	c2.cp.reactome	REACTOME_HEMOSTASIS	http://www.gsea-msigdb.org/gsea/msigdb/cards/REACTOME_HEMOSTASIS	325	1.94702537963219	0.139155940938686	1
iPSC-CVPC	Heart	c2.cp.reactome	REACTOME_HIV_INFECTION	http://www.gsea-msigdb.org/gsea/msigdb/cards/REACTOME_HIV_INFECTION	136	2.07466368856038	0.0482440298866066	1
iPSC-CVPC	Arteria	c2.cp.reactome	REACTOME_HIV_INFECTION	http://www.gsea-msigdb.org/gsea/msigdb/cards/REACTOME_HIV_INFECTION	136	1.36991882703166	0.339909729952218	1
iPSC-CVPC	Heart	c2.cp.reactome	REACTOME_HIV_LIFE_CYCLE	http://www.gsea-msigdb.org/gsea/msigdb/cards/REACTOME_HIV_LIFE_CYCLE	91	1.68956659829649	0.233249351034531	1
iPSC-CVPC	Arteria	c2.cp.reactome	REACTOME_HIV_LIFE_CYCLE	http://www.gsea-msigdb.org/gsea/msigdb/cards/REACTOME_HIV_LIFE_CYCLE	91	1.43699565044308	0.349805523260354	1
iPSC-CVPC	Heart	c2.cp.reactome	REACTOME_HOST_INTERACTIONS_OF_HIV_FACTORS	http://www.gsea-msigdb.org/gsea/msigdb/cards/REACTOME_HOST_INTERACTIONS_OF_HIV_FACTORS	79	2.39823147633497	0.0485095060074074	1
iPSC-CVPC	Arteria	c2.cp.reactome	REACTOME_HOST_INTERACTIONS_OF_HIV_FACTORS	http://www.gsea-msigdb.org/gsea/msigdb/cards/REACTOME_HOST_INTERACTIONS_OF_HIV_FACTORS	79	1.16232936200353	0.622983630862924	1
iPSC-CVPC	Heart	c2.cp.reactome	REACTOME_RESPIRATORY_ELECTRON_TRANSPORT_ATP_SYNTHESIS_BY_CHEMIOSMOTIC_COUPLING_AND_HEAT_PRODUCTION_BY_UNCOUPLING_PROTEINS	http://www.gsea-msigdb.org/gsea/msigdb/cards/REACTOME_RESPIRATORY_ELECTRON_TRANSPORT_ATP_SYNTHESIS_BY_CHEMIOSMOTIC_COUPLING_AND_HEAT_PRODUCTION_BY_UNCOUPLING_PROTEINS	45	1.34590988905623	0.662755590345398	1
iPSC-CVPC	Arteria	c2.cp.reactome	REACTOME_RESPIRATORY_ELECTRON_TRANSPORT_ATP_SYNTHESIS_BY_CHEMIOSMOTIC_COUPLING_AND_HEAT_PRODUCTION_BY_UNCOUPLING_PROTEINS	http://www.gsea-msigdb.org/gsea/msigdb/cards/REACTOME_RESPIRATORY_ELECTRON_TRANSPORT_ATP_SYNTHESIS_BY_CHEMIOSMOTIC_COUPLING_AND_HEAT_PRODUCTION_BY_UNCOUPLING_PROTEINS	45	1.22844605200743	0.73661172277801	1
Heart	Arteria	c2.cp.reactome	REACTOME_RESPIRATORY_ELECTRON_TRANSPORT_ATP_SYNTHESIS_BY_CHEMIOSMOTIC_COUPLING_AND_HEAT_PRODUCTION_BY_UNCOUPLING_PROTEINS	http://www.gsea-msigdb.org/gsea/msigdb/cards/REACTOME_RESPIRATORY_ELECTRON_TRANSPORT_ATP_SYNTHESIS_BY_CHEMIOSMOTIC_COUPLING_AND_HEAT_PRODUCTION_BY_UNCOUPLING_PROTEINS	45	16.3429375019684	4.6850953154017e-06	0.00851820604769759
iPSC-CVPC	Heart	c2.cp.reactome	REACTOME_VIRAL_MESSENGER_RNA_SYNTHESIS	http://www.gsea-msigdb.org/gsea/msigdb/cards/REACTOME_VIRAL_MESSENGER_RNA_SYNTHESIS	27	1.11169901971168	0.601365256044616	1
iPSC-CVPC	Arteria	c2.cp.reactome	REACTOME_VIRAL_MESSENGER_RNA_SYNTHESIS	http://www.gsea-msigdb.org/gsea/msigdb/cards/REACTOME_VIRAL_MESSENGER_RNA_SYNTHESIS	27	0.660290068265155	1	1
iPSC-CVPC	Heart	c2.cp.reactome	REACTOME_INTERACTIONS_OF_VPR_WITH_HOST_CELLULAR_PROTEINS	http://www.gsea-msigdb.org/gsea/msigdb/cards/REACTOME_INTERACTIONS_OF_VPR_WITH_HOST_CELLULAR_PROTEINS	26	1.15627400163101	0.587535071050246	1
iPSC-CVPC	Arteria	c2.cp.reactome	REACTOME_INTERACTIONS_OF_VPR_WITH_HOST_CELLULAR_PROTEINS	http://www.gsea-msigdb.org/gsea/msigdb/cards/REACTOME_INTERACTIONS_OF_VPR_WITH_HOST_CELLULAR_PROTEINS	26	0.686769395472494	1	1
iPSC-CVPC	Arteria	c2.cp.reactome	REACTOME_FORMATION_OF_ATP_BY_CHEMIOSMOTIC_COUPLING	http://www.gsea-msigdb.org/gsea/msigdb/cards/REACTOME_FORMATION_OF_ATP_BY_CHEMIOSMOTIC_COUPLING	7	0	1	1
Heart	Arteria	c2.cp.reactome	REACTOME_FORMATION_OF_ATP_BY_CHEMIOSMOTIC_COUPLING	http://www.gsea-msigdb.org/gsea/msigdb/cards/REACTOME_FORMATION_OF_ATP_BY_CHEMIOSMOTIC_COUPLING	7	16.9048670887581	0.0668841366367879	1
iPSC-CVPC	Heart	c2.cp.reactome	REACTOME_APC_C_CDH1_MEDIATED_DEGRADATION_OF_CDC20_AND_OTHER_APC_C_CDH1_TARGETED_PROTEINS_IN_LATE_MITOSIS_EARLY_G1	http://www.gsea-msigdb.org/gsea/msigdb/cards/REACTOME_APC_C_CDH1_MEDIATED_DEGRADATION_OF_CDC20_AND_OTHER_APC_C_CDH1_TARGETED_PROTEINS_IN_LATE_MITOSIS_EARLY_G1	51	1.81266200771826	0.242759133139038	1
iPSC-CVPC	Arteria	c2.cp.reactome	REACTOME_APC_C_CDH1_MEDIATED_DEGRADATION_OF_CDC20_AND_OTHER_APC_C_CDH1_TARGETED_PROTEINS_IN_LATE_MITOSIS_EARLY_G1	http://www.gsea-msigdb.org/gsea/msigdb/cards/REACTOME_APC_C_CDH1_MEDIATED_DEGRADATION_OF_CDC20_AND_OTHER_APC_C_CDH1_TARGETED_PROTEINS_IN_LATE_MITOSIS_EARLY_G1	51	3.72266946240055	0.00165316116093508	0.426238128605368
Heart	Arteria	c2.cp.reactome	REACTOME_APC_C_CDH1_MEDIATED_DEGRADATION_OF_CDC20_AND_OTHER_APC_C_CDH1_TARGETED_PROTEINS_IN_LATE_MITOSIS_EARLY_G1	http://www.gsea-msigdb.org/gsea/msigdb/cards/REACTOME_APC_C_CDH1_MEDIATED_DEGRADATION_OF_CDC20_AND_OTHER_APC_C_CDH1_TARGETED_PROTEINS_IN_LATE_MITOSIS_EARLY_G1	51	2.02249827275683	0.396740815076136	1
iPSC-CVPC	Heart	c2.cp.reactome	REACTOME_ACTIVATION_OF_ATR_IN_RESPONSE_TO_REPLICATION_STRESS	http://www.gsea-msigdb.org/gsea/msigdb/cards/REACTOME_ACTIVATION_OF_ATR_IN_RESPONSE_TO_REPLICATION_STRESS	23	0	1	1
iPSC-CVPC	Arteria	c2.cp.reactome	REACTOME_ACTIVATION_OF_ATR_IN_RESPONSE_TO_REPLICATION_STRESS	http://www.gsea-msigdb.org/gsea/msigdb/cards/REACTOME_ACTIVATION_OF_ATR_IN_RESPONSE_TO_REPLICATION_STRESS	23	0.780649970119104	1	1
iPSC-CVPC	Heart	c2.cp.reactome	REACTOME_UNWINDING_OF_DNA	http://www.gsea-msigdb.org/gsea/msigdb/cards/REACTOME_UNWINDING_OF_DNA	7	0	1	1
iPSC-CVPC	Arteria	c2.cp.reactome	REACTOME_UNWINDING_OF_DNA	http://www.gsea-msigdb.org/gsea/msigdb/cards/REACTOME_UNWINDING_OF_DNA	7	0	1	1
iPSC-CVPC	Heart	c2.cp.reactome	REACTOME_INNATE_IMMUNE_SYSTEM	http://www.gsea-msigdb.org/gsea/msigdb/cards/REACTOME_INNATE_IMMUNE_SYSTEM	562	1.24907299518011	0.333095713157999	1
iPSC-CVPC	Arteria	c2.cp.reactome	REACTOME_INNATE_IMMUNE_SYSTEM	http://www.gsea-msigdb.org/gsea/msigdb/cards/REACTOME_INNATE_IMMUNE_SYSTEM	562	1.30125751755279	0.127860629888931	1
Heart	Arteria	c2.cp.reactome	REACTOME_INNATE_IMMUNE_SYSTEM	http://www.gsea-msigdb.org/gsea/msigdb/cards/REACTOME_INNATE_IMMUNE_SYSTEM	562	1.0913160802525	0.824351054084873	1
iPSC-CVPC	Heart	c2.cp.reactome	REACTOME_MITOTIC_PROMETAPHASE	http://www.gsea-msigdb.org/gsea/msigdb/cards/REACTOME_MITOTIC_PROMETAPHASE	130	1.40494691216457	0.453570127261097	1
iPSC-CVPC	Arteria	c2.cp.reactome	REACTOME_MITOTIC_PROMETAPHASE	http://www.gsea-msigdb.org/gsea/msigdb/cards/REACTOME_MITOTIC_PROMETAPHASE	130	2.27346467705564	0.00571359608755079	0.803216748972927
iPSC-CVPC	Heart	c2.cp.reactome	REACTOME_G1_S_SPECIFIC_TRANSCRIPTION	http://www.gsea-msigdb.org/gsea/msigdb/cards/REACTOME_G1_S_SPECIFIC_TRANSCRIPTION	20	0	1	1
iPSC-CVPC	Arteria	c2.cp.reactome	REACTOME_G1_S_SPECIFIC_TRANSCRIPTION	http://www.gsea-msigdb.org/gsea/msigdb/cards/REACTOME_G1_S_SPECIFIC_TRANSCRIPTION	20	3.04207005490199	0.0941377647123002	1
iPSC-CVPC	Heart	c2.cp.reactome	REACTOME_SIGNALING_BY_TGF_BETA_RECEPTOR_COMPLEX	http://www.gsea-msigdb.org/gsea/msigdb/cards/REACTOME_SIGNALING_BY_TGF_BETA_RECEPTOR_COMPLEX	58	0.505589194361402	1	1
iPSC-CVPC	Arteria	c2.cp.reactome	REACTOME_SIGNALING_BY_TGF_BETA_RECEPTOR_COMPLEX	http://www.gsea-msigdb.org/gsea/msigdb/cards/REACTOME_SIGNALING_BY_TGF_BETA_RECEPTOR_COMPLEX	58	2.37462484134587	0.0388368573538164	1
iPSC-CVPC	Heart	c2.cp.reactome	REACTOME_INTEGRATION_OF_PROVIRUS	http://www.gsea-msigdb.org/gsea/msigdb/cards/REACTOME_INTEGRATION_OF_PROVIRUS	6	0	1	1
iPSC-CVPC	Arteria	c2.cp.reactome	REACTOME_INTEGRATION_OF_PROVIRUS	http://www.gsea-msigdb.org/gsea/msigdb/cards/REACTOME_INTEGRATION_OF_PROVIRUS	6	0	1	1
iPSC-CVPC	Heart	c2.cp.reactome	REACTOME_COMPLEMENT_CASCADE	http://www.gsea-msigdb.org/gsea/msigdb/cards/REACTOME_COMPLEMENT_CASCADE	29	1.03211027703323	1	1
iPSC-CVPC	Arteria	c2.cp.reactome	REACTOME_COMPLEMENT_CASCADE	http://www.gsea-msigdb.org/gsea/msigdb/cards/REACTOME_COMPLEMENT_CASCADE	29	1.98745392537868	0.212089918523982	1
Heart	Arteria	c2.cp.reactome	REACTOME_COMPLEMENT_CASCADE	http://www.gsea-msigdb.org/gsea/msigdb/cards/REACTOME_COMPLEMENT_CASCADE	29	0	1	1
iPSC-CVPC	Heart	c2.cp.reactome	REACTOME_GLUCOSE_METABOLISM	http://www.gsea-msigdb.org/gsea/msigdb/cards/REACTOME_GLUCOSE_METABOLISM	58	1.03220061463546	0.720941836799748	1
iPSC-CVPC	Arteria	c2.cp.reactome	REACTOME_GLUCOSE_METABOLISM	http://www.gsea-msigdb.org/gsea/msigdb/cards/REACTOME_GLUCOSE_METABOLISM	58	1.27459916224597	0.560191380119274	1
Heart	Arteria	c2.cp.reactome	REACTOME_GLUCOSE_METABOLISM	http://www.gsea-msigdb.org/gsea/msigdb/cards/REACTOME_GLUCOSE_METABOLISM	58	1.77297845029109	0.437277338477816	1
iPSC-CVPC	Heart	c2.cp.reactome	REACTOME_CYTOKINE_SIGNALING_IN_IMMUNE_SYSTEM	http://www.gsea-msigdb.org/gsea/msigdb/cards/REACTOME_CYTOKINE_SIGNALING_IN_IMMUNE_SYSTEM	469	1.23241139543758	0.358088271806576	1
iPSC-CVPC	Arteria	c2.cp.reactome	REACTOME_CYTOKINE_SIGNALING_IN_IMMUNE_SYSTEM	http://www.gsea-msigdb.org/gsea/msigdb/cards/REACTOME_CYTOKINE_SIGNALING_IN_IMMUNE_SYSTEM	469	1.09545784578584	0.605123531547368	1
Heart	Arteria	c2.cp.reactome	REACTOME_CYTOKINE_SIGNALING_IN_IMMUNE_SYSTEM	http://www.gsea-msigdb.org/gsea/msigdb/cards/REACTOME_CYTOKINE_SIGNALING_IN_IMMUNE_SYSTEM	469	1.32268949325381	0.468406348746088	1
iPSC-CVPC	Heart	c2.cp.reactome	REACTOME_CLASS_I_MHC_MEDIATED_ANTIGEN_PROCESSING_PRESENTATION	http://www.gsea-msigdb.org/gsea/msigdb/cards/REACTOME_CLASS_I_MHC_MEDIATED_ANTIGEN_PROCESSING_PRESENTATION	255	1.70621195255988	0.0737936197900658	1
iPSC-CVPC	Arteria	c2.cp.reactome	REACTOME_CLASS_I_MHC_MEDIATED_ANTIGEN_PROCESSING_PRESENTATION	http://www.gsea-msigdb.org/gsea/msigdb/cards/REACTOME_CLASS_I_MHC_MEDIATED_ANTIGEN_PROCESSING_PRESENTATION	255	1.73198485553847	0.0175576125481638	1
iPSC-CVPC	Heart	c2.cp.reactome	REACTOME_ANTIGEN_PROCESSING_UBIQUITINATION_PROTEASOME_DEGRADATION	http://www.gsea-msigdb.org/gsea/msigdb/cards/REACTOME_ANTIGEN_PROCESSING_UBIQUITINATION_PROTEASOME_DEGRADATION	215	1.89203717197368	0.0338895117624523	1
iPSC-CVPC	Arteria	c2.cp.reactome	REACTOME_ANTIGEN_PROCESSING_UBIQUITINATION_PROTEASOME_DEGRADATION	http://www.gsea-msigdb.org/gsea/msigdb/cards/REACTOME_ANTIGEN_PROCESSING_UBIQUITINATION_PROTEASOME_DEGRADATION	215	1.78904665402486	0.0217657543456927	1
Heart	Arteria	c2.cp.reactome	REACTOME_ANTIGEN_PROCESSING_UBIQUITINATION_PROTEASOME_DEGRADATION	http://www.gsea-msigdb.org/gsea/msigdb/cards/REACTOME_ANTIGEN_PROCESSING_UBIQUITINATION_PROTEASOME_DEGRADATION	215	0.465246548703562	0.72633944993612	1
iPSC-CVPC	Heart	c2.cp.reactome	REACTOME_TELOMERE_MAINTENANCE	http://www.gsea-msigdb.org/gsea/msigdb/cards/REACTOME_TELOMERE_MAINTENANCE	39	0.759773223109195	1	1
iPSC-CVPC	Arteria	c2.cp.reactome	REACTOME_TELOMERE_MAINTENANCE	http://www.gsea-msigdb.org/gsea/msigdb/cards/REACTOME_TELOMERE_MAINTENANCE	39	0.451254425563194	0.72314141895197	1
iPSC-CVPC	Heart	c2.cp.reactome	REACTOME_PLATELET_ACTIVATION_SIGNALING_AND_AGGREGATION	http://www.gsea-msigdb.org/gsea/msigdb/cards/REACTOME_PLATELET_ACTIVATION_SIGNALING_AND_AGGREGATION	137	2.05821821304444	0.0494813408045467	1
iPSC-CVPC	Arteria	c2.cp.reactome	REACTOME_PLATELET_ACTIVATION_SIGNALING_AND_AGGREGATION	http://www.gsea-msigdb.org/gsea/msigdb/cards/REACTOME_PLATELET_ACTIVATION_SIGNALING_AND_AGGREGATION	137	1.2113449827866	0.568627811241028	1
Heart	Arteria	c2.cp.reactome	REACTOME_PLATELET_ACTIVATION_SIGNALING_AND_AGGREGATION	http://www.gsea-msigdb.org/gsea/msigdb/cards/REACTOME_PLATELET_ACTIVATION_SIGNALING_AND_AGGREGATION	137	2.28988620880903	0.152248846719564	1
iPSC-CVPC	Heart	c2.cp.reactome	REACTOME_CREATION_OF_C4_AND_C2_ACTIVATORS	http://www.gsea-msigdb.org/gsea/msigdb/cards/REACTOME_CREATION_OF_C4_AND_C2_ACTIVATORS	8	0	1	1
iPSC-CVPC	Arteria	c2.cp.reactome	REACTOME_CREATION_OF_C4_AND_C2_ACTIVATORS	http://www.gsea-msigdb.org/gsea/msigdb/cards/REACTOME_CREATION_OF_C4_AND_C2_ACTIVATORS	8	5.74157083776417	0.0678123645213366	1
Heart	Arteria	c2.cp.reactome	REACTOME_CREATION_OF_C4_AND_C2_ACTIVATORS	http://www.gsea-msigdb.org/gsea/msigdb/cards/REACTOME_CREATION_OF_C4_AND_C2_ACTIVATORS	8	0	1	1
iPSC-CVPC	Heart	c2.cp.reactome	REACTOME_INITIAL_TRIGGERING_OF_COMPLEMENT	http://www.gsea-msigdb.org/gsea/msigdb/cards/REACTOME_INITIAL_TRIGGERING_OF_COMPLEMENT	15	0	1	1
iPSC-CVPC	Arteria	c2.cp.reactome	REACTOME_INITIAL_TRIGGERING_OF_COMPLEMENT	http://www.gsea-msigdb.org/gsea/msigdb/cards/REACTOME_INITIAL_TRIGGERING_OF_COMPLEMENT	15	2.64851901897544	0.198220067025792	1
Heart	Arteria	c2.cp.reactome	REACTOME_INITIAL_TRIGGERING_OF_COMPLEMENT	http://www.gsea-msigdb.org/gsea/msigdb/cards/REACTOME_INITIAL_TRIGGERING_OF_COMPLEMENT	15	0	1	1
iPSC-CVPC	Heart	c2.cp.reactome	REACTOME_EXTENSION_OF_TELOMERES	http://www.gsea-msigdb.org/gsea/msigdb/cards/REACTOME_EXTENSION_OF_TELOMERES	30	0.996416451856083	1	1
iPSC-CVPC	Arteria	c2.cp.reactome	REACTOME_EXTENSION_OF_TELOMERES	http://www.gsea-msigdb.org/gsea/msigdb/cards/REACTOME_EXTENSION_OF_TELOMERES	30	0.591808830738426	1	1
iPSC-CVPC	Heart	c2.cp.reactome	REACTOME_G2_M_CHECKPOINTS	http://www.gsea-msigdb.org/gsea/msigdb/cards/REACTOME_G2_M_CHECKPOINTS	96	0.612664998382708	0.773100778043528	1
iPSC-CVPC	Arteria	c2.cp.reactome	REACTOME_G2_M_CHECKPOINTS	http://www.gsea-msigdb.org/gsea/msigdb/cards/REACTOME_G2_M_CHECKPOINTS	96	1.35560226969869	0.371510126801411	1
Heart	Arteria	c2.cp.reactome	REACTOME_G2_M_CHECKPOINTS	http://www.gsea-msigdb.org/gsea/msigdb/cards/REACTOME_G2_M_CHECKPOINTS	96	2.1634236813327	0.24359609698057	1
iPSC-CVPC	Heart	c2.cp.reactome	REACTOME_G2_M_DNA_DAMAGE_CHECKPOINT	http://www.gsea-msigdb.org/gsea/msigdb/cards/REACTOME_G2_M_DNA_DAMAGE_CHECKPOINT	52	0	0.421537626910012	1
iPSC-CVPC	Arteria	c2.cp.reactome	REACTOME_G2_M_DNA_DAMAGE_CHECKPOINT	http://www.gsea-msigdb.org/gsea/msigdb/cards/REACTOME_G2_M_DNA_DAMAGE_CHECKPOINT	52	0.686233165556981	1	1
iPSC-CVPC	Heart	c2.cp.reactome	REACTOME_S_PHASE	http://www.gsea-msigdb.org/gsea/msigdb/cards/REACTOME_S_PHASE	105	1.45105323419827	0.403645763830449	1
iPSC-CVPC	Arteria	c2.cp.reactome	REACTOME_S_PHASE	http://www.gsea-msigdb.org/gsea/msigdb/cards/REACTOME_S_PHASE	105	2.6834167773852	0.00176929802169689	0.431791838677612
Heart	Arteria	c2.cp.reactome	REACTOME_S_PHASE	http://www.gsea-msigdb.org/gsea/msigdb/cards/REACTOME_S_PHASE	105	0.967458567650123	1	1
iPSC-CVPC	Heart	c2.cp.reactome	REACTOME_DNA_STRAND_ELONGATION	http://www.gsea-msigdb.org/gsea/msigdb/cards/REACTOME_DNA_STRAND_ELONGATION	19	0	1	1
iPSC-CVPC	Arteria	c2.cp.reactome	REACTOME_DNA_STRAND_ELONGATION	http://www.gsea-msigdb.org/gsea/msigdb/cards/REACTOME_DNA_STRAND_ELONGATION	19	0	0.622201972793475	1
iPSC-CVPC	Arteria	c2.cp.reactome	REACTOME_CHOLESTEROL_BIOSYNTHESIS	http://www.gsea-msigdb.org/gsea/msigdb/cards/REACTOME_CHOLESTEROL_BIOSYNTHESIS	16	1.14571734678302	0.595764171255043	1
Heart	Arteria	c2.cp.reactome	REACTOME_CHOLESTEROL_BIOSYNTHESIS	http://www.gsea-msigdb.org/gsea/msigdb/cards/REACTOME_CHOLESTEROL_BIOSYNTHESIS	16	0	1	1
iPSC-CVPC	Heart	c2.cp.reactome	REACTOME_SIGNALING_BY_FGFR	http://www.gsea-msigdb.org/gsea/msigdb/cards/REACTOME_SIGNALING_BY_FGFR	47	0.627156755652917	1	1
iPSC-CVPC	Arteria	c2.cp.reactome	REACTOME_RECOGNITION_OF_DNA_DAMAGE_BY_PCNA_CONTAINING_REPLICATION_COMPLEX	http://www.gsea-msigdb.org/gsea/msigdb/cards/REACTOME_RECOGNITION_OF_DNA_DAMAGE_BY_PCNA_CONTAINING_REPLICATION_COMPLEX	22	0.817903741612932	1	1
iPSC-CVPC	Heart	c2.cp.reactome	REACTOME_TRANSLESION_SYNTHESIS_BY_POLH	http://www.gsea-msigdb.org/gsea/msigdb/cards/REACTOME_TRANSLESION_SYNTHESIS_BY_POLH	14	2.22602531482241	0.379103397863552	1
iPSC-CVPC	Arteria	c2.cp.reactome	REACTOME_TRANSLESION_SYNTHESIS_BY_POLH	http://www.gsea-msigdb.org/gsea/msigdb/cards/REACTOME_TRANSLESION_SYNTHESIS_BY_POLH	14	2.86962114925967	0.177913938735029	1
iPSC-CVPC	Heart	c2.cp.reactome	REACTOME_POLB_DEPENDENT_LONG_PATCH_BASE_EXCISION_REPAIR	http://www.gsea-msigdb.org/gsea/msigdb/cards/REACTOME_POLB_DEPENDENT_LONG_PATCH_BASE_EXCISION_REPAIR	5	0	1	1
iPSC-CVPC	Arteria	c2.cp.reactome	REACTOME_POLB_DEPENDENT_LONG_PATCH_BASE_EXCISION_REPAIR	http://www.gsea-msigdb.org/gsea/msigdb/cards/REACTOME_POLB_DEPENDENT_LONG_PATCH_BASE_EXCISION_REPAIR	5	0	1	1
iPSC-CVPC	Arteria	c2.cp.reactome	REACTOME_ACTIVATION_OF_NOXA_AND_TRANSLOCATION_TO_MITOCHONDRIA	http://www.gsea-msigdb.org/gsea/msigdb/cards/REACTOME_ACTIVATION_OF_NOXA_AND_TRANSLOCATION_TO_MITOCHONDRIA	3	8.60080469666007	0.156101417358333	1
iPSC-CVPC	Arteria	c2.cp.reactome	REACTOME_NEUROTRANSMITTER_RECEPTORS_AND_POSTSYNAPTIC_SIGNAL_TRANSMISSION	http://www.gsea-msigdb.org/gsea/msigdb/cards/REACTOME_NEUROTRANSMITTER_RECEPTORS_AND_POSTSYNAPTIC_SIGNAL_TRANSMISSION	93	0.770684259222684	0.819102862101008	1
iPSC-CVPC	Heart	c2.cp.reactome	REACTOME_FORMATION_OF_THE_EARLY_ELONGATION_COMPLEX	http://www.gsea-msigdb.org/gsea/msigdb/cards/REACTOME_FORMATION_OF_THE_EARLY_ELONGATION_COMPLEX	20	0	1	1
iPSC-CVPC	Arteria	c2.cp.reactome	REACTOME_FORMATION_OF_THE_EARLY_ELONGATION_COMPLEX	http://www.gsea-msigdb.org/gsea/msigdb/cards/REACTOME_FORMATION_OF_THE_EARLY_ELONGATION_COMPLEX	20	3.04207005490199	0.0941377647123002	1
iPSC-CVPC	Arteria	c2.cp.reactome	REACTOME_FERTILIZATION	http://www.gsea-msigdb.org/gsea/msigdb/cards/REACTOME_FERTILIZATION	5	0	1	1
iPSC-CVPC	Arteria	c2.cp.reactome	REACTOME_CELLULAR_RESPONSE_TO_HYPOXIA	http://www.gsea-msigdb.org/gsea/msigdb/cards/REACTOME_CELLULAR_RESPONSE_TO_HYPOXIA	51	1.46541341719718	0.363178488312094	1
Heart	Arteria	c2.cp.reactome	REACTOME_CELLULAR_RESPONSE_TO_HYPOXIA	http://www.gsea-msigdb.org/gsea/msigdb/cards/REACTOME_CELLULAR_RESPONSE_TO_HYPOXIA	51	2.02249827275683	0.396740815076136	1
iPSC-CVPC	Heart	c2.cp.reactome	REACTOME_ERYTHROCYTES_TAKE_UP_OXYGEN_AND_RELEASE_CARBON_DIOXIDE	http://www.gsea-msigdb.org/gsea/msigdb/cards/REACTOME_ERYTHROCYTES_TAKE_UP_OXYGEN_AND_RELEASE_CARBON_DIOXIDE	4	9.65033129400561	0.127248014972536	1
iPSC-CVPC	Arteria	c2.cp.reactome	REACTOME_GRB7_EVENTS_IN_ERBB2_SIGNALING	http://www.gsea-msigdb.org/gsea/msigdb/cards/REACTOME_GRB7_EVENTS_IN_ERBB2_SIGNALING	2	0	1	1
iPSC-CVPC	Heart	c2.cp.reactome	REACTOME_TRANSCRIPTION_OF_E2F_TARGETS_UNDER_NEGATIVE_CONTROL_BY_P107_RBL1_AND_P130_RBL2_IN_COMPLEX_WITH_HDAC1	http://www.gsea-msigdb.org/gsea/msigdb/cards/REACTOME_TRANSCRIPTION_OF_E2F_TARGETS_UNDER_NEGATIVE_CONTROL_BY_P107_RBL1_AND_P130_RBL2_IN_COMPLEX_WITH_HDAC1	11	0	1	1
Heart	Arteria	c2.cp.reactome	REACTOME_MITOCHONDRIAL_IRON_SULFUR_CLUSTER_BIOGENESIS	http://www.gsea-msigdb.org/gsea/msigdb/cards/REACTOME_MITOCHONDRIAL_IRON_SULFUR_CLUSTER_BIOGENESIS	8	0	1	1
iPSC-CVPC	Arteria	c2.cp.reactome	REACTOME_ACTIVATION_OF_PUMA_AND_TRANSLOCATION_TO_MITOCHONDRIA	http://www.gsea-msigdb.org/gsea/msigdb/cards/REACTOME_ACTIVATION_OF_PUMA_AND_TRANSLOCATION_TO_MITOCHONDRIA	5	4.30013123953848	0.246404002422746	1
iPSC-CVPC	Arteria	c2.cp.reactome	REACTOME_CASPASE_ACTIVATION_VIA_DEATH_RECEPTORS_IN_THE_PRESENCE_OF_LIGAND	http://www.gsea-msigdb.org/gsea/msigdb/cards/REACTOME_CASPASE_ACTIVATION_VIA_DEATH_RECEPTORS_IN_THE_PRESENCE_OF_LIGAND	11	0	1	1
iPSC-CVPC	Heart	c2.cp.reactome	REACTOME_THE_CITRIC_ACID_TCA_CYCLE_AND_RESPIRATORY_ELECTRON_TRANSPORT	http://www.gsea-msigdb.org/gsea/msigdb/cards/REACTOME_THE_CITRIC_ACID_TCA_CYCLE_AND_RESPIRATORY_ELECTRON_TRANSPORT	73	1.68268860407239	0.310306831317934	1
iPSC-CVPC	Arteria	c2.cp.reactome	REACTOME_THE_CITRIC_ACID_TCA_CYCLE_AND_RESPIRATORY_ELECTRON_TRANSPORT	http://www.gsea-msigdb.org/gsea/msigdb/cards/REACTOME_THE_CITRIC_ACID_TCA_CYCLE_AND_RESPIRATORY_ELECTRON_TRANSPORT	73	1.54417684178993	0.295887052774557	1
Heart	Arteria	c2.cp.reactome	REACTOME_THE_CITRIC_ACID_TCA_CYCLE_AND_RESPIRATORY_ELECTRON_TRANSPORT	http://www.gsea-msigdb.org/gsea/msigdb/cards/REACTOME_THE_CITRIC_ACID_TCA_CYCLE_AND_RESPIRATORY_ELECTRON_TRANSPORT	73	9.49276490653183	7.8382160074429e-05	0.0611883020338228
iPSC-CVPC	Arteria	c2.cp.reactome	REACTOME_REGULATION_OF_SIGNALING_BY_NODAL	http://www.gsea-msigdb.org/gsea/msigdb/cards/REACTOME_REGULATION_OF_SIGNALING_BY_NODAL	4	0	1	1
iPSC-CVPC	Heart	c2.cp.reactome	REACTOME_HYDROLYSIS_OF_LPC	http://www.gsea-msigdb.org/gsea/msigdb/cards/REACTOME_HYDROLYSIS_OF_LPC	3	0	1	1
Heart	Arteria	c2.cp.reactome	REACTOME_SYNTHESIS_OF_PIPS_AT_THE_ER_MEMBRANE	http://www.gsea-msigdb.org/gsea/msigdb/cards/REACTOME_SYNTHESIS_OF_PIPS_AT_THE_ER_MEMBRANE	4	0	1	1
iPSC-CVPC	Heart	c2.cp.reactome	REACTOME_GAP_JUNCTION_TRAFFICKING_AND_REGULATION	http://www.gsea-msigdb.org/gsea/msigdb/cards/REACTOME_GAP_JUNCTION_TRAFFICKING_AND_REGULATION	22	0	1	1
iPSC-CVPC	Arteria	c2.cp.reactome	REACTOME_GAP_JUNCTION_TRAFFICKING_AND_REGULATION	http://www.gsea-msigdb.org/gsea/msigdb/cards/REACTOME_GAP_JUNCTION_TRAFFICKING_AND_REGULATION	22	2.72148304219422	0.117469716381325	1
iPSC-CVPC	Arteria	c2.cp.reactome	REACTOME_TRANSPORT_OF_THE_SLBP_DEPENDANT_MATURE_MRNA	http://www.gsea-msigdb.org/gsea/msigdb/cards/REACTOME_TRANSPORT_OF_THE_SLBP_DEPENDANT_MATURE_MRNA	26	0.686769395472494	1	1
Heart	Arteria	c2.cp.reactome	REACTOME_TRANSPORT_OF_THE_SLBP_DEPENDANT_MATURE_MRNA	http://www.gsea-msigdb.org/gsea/msigdb/cards/REACTOME_TRANSPORT_OF_THE_SLBP_DEPENDANT_MATURE_MRNA	26	0	1	1
iPSC-CVPC	Heart	c2.cp.reactome	REACTOME_TRANSPORT_OF_MATURE_MRNAS_DERIVED_FROM_INTRONLESS_TRANSCRIPTS	http://www.gsea-msigdb.org/gsea/msigdb/cards/REACTOME_TRANSPORT_OF_MATURE_MRNAS_DERIVED_FROM_INTRONLESS_TRANSCRIPTS	32	0.931955759651939	1	1
iPSC-CVPC	Arteria	c2.cp.reactome	REACTOME_TRANSPORT_OF_MATURE_MRNAS_DERIVED_FROM_INTRONLESS_TRANSCRIPTS	http://www.gsea-msigdb.org/gsea/msigdb/cards/REACTOME_TRANSPORT_OF_MATURE_MRNAS_DERIVED_FROM_INTRONLESS_TRANSCRIPTS	32	1.14596644566813	0.695163098811092	1
iPSC-CVPC	Heart	c2.cp.reactome	REACTOME_ACTIVATION_OF_MATRIX_METALLOPROTEINASES	http://www.gsea-msigdb.org/gsea/msigdb/cards/REACTOME_ACTIVATION_OF_MATRIX_METALLOPROTEINASES	8	0	1	1
iPSC-CVPC	Arteria	c2.cp.reactome	REACTOME_ACTIVATION_OF_MATRIX_METALLOPROTEINASES	http://www.gsea-msigdb.org/gsea/msigdb/cards/REACTOME_ACTIVATION_OF_MATRIX_METALLOPROTEINASES	8	2.45677597834622	0.36409345665046	1
iPSC-CVPC	Heart	c2.cp.reactome	REACTOME_PKA_ACTIVATION_IN_GLUCAGON_SIGNALLING	http://www.gsea-msigdb.org/gsea/msigdb/cards/REACTOME_PKA_ACTIVATION_IN_GLUCAGON_SIGNALLING	12	0	1	1
iPSC-CVPC	Arteria	c2.cp.reactome	REACTOME_PKA_ACTIVATION_IN_GLUCAGON_SIGNALLING	http://www.gsea-msigdb.org/gsea/msigdb/cards/REACTOME_PKA_ACTIVATION_IN_GLUCAGON_SIGNALLING	12	1.56288361152648	0.492970723871524	1
Heart	Arteria	c2.cp.reactome	REACTOME_PKA_ACTIVATION_IN_GLUCAGON_SIGNALLING	http://www.gsea-msigdb.org/gsea/msigdb/cards/REACTOME_PKA_ACTIVATION_IN_GLUCAGON_SIGNALLING	12	0	1	1
iPSC-CVPC	Heart	c2.cp.reactome	REACTOME_NEF_AND_SIGNAL_TRANSDUCTION	http://www.gsea-msigdb.org/gsea/msigdb/cards/REACTOME_NEF_AND_SIGNAL_TRANSDUCTION	5	0	1	1
iPSC-CVPC	Arteria	c2.cp.reactome	REACTOME_NEF_AND_SIGNAL_TRANSDUCTION	http://www.gsea-msigdb.org/gsea/msigdb/cards/REACTOME_NEF_AND_SIGNAL_TRANSDUCTION	5	0	1	1
iPSC-CVPC	Heart	c2.cp.reactome	REACTOME_TOLL_LIKE_RECEPTOR_4_TLR4_CASCADE	http://www.gsea-msigdb.org/gsea/msigdb/cards/REACTOME_TOLL_LIKE_RECEPTOR_4_TLR4_CASCADE	88	0	0.123576576624038	1
iPSC-CVPC	Arteria	c2.cp.reactome	REACTOME_TOLL_LIKE_RECEPTOR_4_TLR4_CASCADE	http://www.gsea-msigdb.org/gsea/msigdb/cards/REACTOME_TOLL_LIKE_RECEPTOR_4_TLR4_CASCADE	88	0.816965724932568	1	1
Heart	Arteria	c2.cp.reactome	REACTOME_TOLL_LIKE_RECEPTOR_4_TLR4_CASCADE	http://www.gsea-msigdb.org/gsea/msigdb/cards/REACTOME_TOLL_LIKE_RECEPTOR_4_TLR4_CASCADE	88	2.36629405618028	0.214540118419082	1
iPSC-CVPC	Heart	c2.cp.reactome	REACTOME_ABORTIVE_ELONGATION_OF_HIV_1_TRANSCRIPT_IN_THE_ABSENCE_OF_TAT	http://www.gsea-msigdb.org/gsea/msigdb/cards/REACTOME_ABORTIVE_ELONGATION_OF_HIV_1_TRANSCRIPT_IN_THE_ABSENCE_OF_TAT	11	0	1	1
iPSC-CVPC	Arteria	c2.cp.reactome	REACTOME_ABORTIVE_ELONGATION_OF_HIV_1_TRANSCRIPT_IN_THE_ABSENCE_OF_TAT	http://www.gsea-msigdb.org/gsea/msigdb/cards/REACTOME_ABORTIVE_ELONGATION_OF_HIV_1_TRANSCRIPT_IN_THE_ABSENCE_OF_TAT	11	1.71933654701835	0.463429663316942	1
iPSC-CVPC	Heart	c2.cp.reactome	REACTOME_HIV_ELONGATION_ARREST_AND_RECOVERY	http://www.gsea-msigdb.org/gsea/msigdb/cards/REACTOME_HIV_ELONGATION_ARREST_AND_RECOVERY	19	1.60694629932077	0.476362698078548	1
iPSC-CVPC	Arteria	c2.cp.reactome	REACTOME_HIV_ELONGATION_ARREST_AND_RECOVERY	http://www.gsea-msigdb.org/gsea/msigdb/cards/REACTOME_HIV_ELONGATION_ARREST_AND_RECOVERY	19	0.954497488400478	1	1
iPSC-CVPC	Heart	c2.cp.reactome	REACTOME_NEF_MEDIATED_CD4_DOWN_REGULATION	http://www.gsea-msigdb.org/gsea/msigdb/cards/REACTOME_NEF_MEDIATED_CD4_DOWN_REGULATION	4	0	1	1
iPSC-CVPC	Arteria	c2.cp.reactome	REACTOME_NEF_MEDIATED_CD4_DOWN_REGULATION	http://www.gsea-msigdb.org/gsea/msigdb/cards/REACTOME_NEF_MEDIATED_CD4_DOWN_REGULATION	4	0	1	1
iPSC-CVPC	Heart	c2.cp.reactome	REACTOME_EXPORT_OF_VIRAL_RIBONUCLEOPROTEINS_FROM_NUCLEUS	http://www.gsea-msigdb.org/gsea/msigdb/cards/REACTOME_EXPORT_OF_VIRAL_RIBONUCLEOPROTEINS_FROM_NUCLEUS	24	1.25705143606399	0.558422901964669	1
iPSC-CVPC	Arteria	c2.cp.reactome	REACTOME_EXPORT_OF_VIRAL_RIBONUCLEOPROTEINS_FROM_NUCLEUS	http://www.gsea-msigdb.org/gsea/msigdb/cards/REACTOME_EXPORT_OF_VIRAL_RIBONUCLEOPROTEINS_FROM_NUCLEUS	24	0.746635419487616	1	1
Heart	Arteria	c2.cp.reactome	REACTOME_EXPORT_OF_VIRAL_RIBONUCLEOPROTEINS_FROM_NUCLEUS	http://www.gsea-msigdb.org/gsea/msigdb/cards/REACTOME_EXPORT_OF_VIRAL_RIBONUCLEOPROTEINS_FROM_NUCLEUS	24	0	1	1
iPSC-CVPC	Heart	c2.cp.reactome	REACTOME_NEUROTOXICITY_OF_CLOSTRIDIUM_TOXINS	http://www.gsea-msigdb.org/gsea/msigdb/cards/REACTOME_NEUROTOXICITY_OF_CLOSTRIDIUM_TOXINS	4	0	1	1
iPSC-CVPC	Arteria	c2.cp.reactome	REACTOME_NEUROTOXICITY_OF_CLOSTRIDIUM_TOXINS	http://www.gsea-msigdb.org/gsea/msigdb/cards/REACTOME_NEUROTOXICITY_OF_CLOSTRIDIUM_TOXINS	4	0	1	1
Heart	Arteria	c2.cp.reactome	REACTOME_TELOMERE_EXTENSION_BY_TELOMERASE	http://www.gsea-msigdb.org/gsea/msigdb/cards/REACTOME_TELOMERE_EXTENSION_BY_TELOMERASE	11	0	1	1
Heart	Arteria	c2.cp.reactome	REACTOME_GLUTATHIONE_SYNTHESIS_AND_RECYCLING	http://www.gsea-msigdb.org/gsea/msigdb/cards/REACTOME_GLUTATHIONE_SYNTHESIS_AND_RECYCLING	10	0	1	1
Heart	Arteria	c2.cp.reactome	REACTOME_PROCESSIVE_SYNTHESIS_ON_THE_C_STRAND_OF_THE_TELOMERE	http://www.gsea-msigdb.org/gsea/msigdb/cards/REACTOME_PROCESSIVE_SYNTHESIS_ON_THE_C_STRAND_OF_THE_TELOMERE	8	0	1	1
iPSC-CVPC	Heart	c2.cp.reactome	REACTOME_ACTIVATION_OF_C3_AND_C5	http://www.gsea-msigdb.org/gsea/msigdb/cards/REACTOME_ACTIVATION_OF_C3_AND_C5	7	0	1	1
iPSC-CVPC	Arteria	c2.cp.reactome	REACTOME_ACTIVATION_OF_C3_AND_C5	http://www.gsea-msigdb.org/gsea/msigdb/cards/REACTOME_ACTIVATION_OF_C3_AND_C5	7	0	1	1
iPSC-CVPC	Arteria	c2.cp.reactome	REACTOME_PLASMA_LIPOPROTEIN_ASSEMBLY_REMODELING_AND_CLEARANCE	http://www.gsea-msigdb.org/gsea/msigdb/cards/REACTOME_PLASMA_LIPOPROTEIN_ASSEMBLY_REMODELING_AND_CLEARANCE	41	0.880744141402176	1	1
iPSC-CVPC	Heart	c2.cp.reactome	REACTOME_INTERACTIONS_OF_REV_WITH_HOST_CELLULAR_PROTEINS	http://www.gsea-msigdb.org/gsea/msigdb/cards/REACTOME_INTERACTIONS_OF_REV_WITH_HOST_CELLULAR_PROTEINS	26	2.41562913732889	0.215511023774799	1
iPSC-CVPC	Heart	c2.cp.reactome	REACTOME_SIGNALING_BY_EGFR	http://www.gsea-msigdb.org/gsea/msigdb/cards/REACTOME_SIGNALING_BY_EGFR	35	0.849482549548683	1	1
iPSC-CVPC	Arteria	c2.cp.reactome	REACTOME_SIGNALING_BY_EGFR	http://www.gsea-msigdb.org/gsea/msigdb/cards/REACTOME_SIGNALING_BY_EGFR	35	2.87925812687103	0.0409846736271756	1
iPSC-CVPC	Heart	c2.cp.reactome	REACTOME_RIP_MEDIATED_NFKB_ACTIVATION_VIA_ZBP1	http://www.gsea-msigdb.org/gsea/msigdb/cards/REACTOME_RIP_MEDIATED_NFKB_ACTIVATION_VIA_ZBP1	13	0	1	1
iPSC-CVPC	Arteria	c2.cp.reactome	REACTOME_RIP_MEDIATED_NFKB_ACTIVATION_VIA_ZBP1	http://www.gsea-msigdb.org/gsea/msigdb/cards/REACTOME_RIP_MEDIATED_NFKB_ACTIVATION_VIA_ZBP1	13	0	1	1
iPSC-CVPC	Heart	c2.cp.reactome	REACTOME_SYNTHESIS_OF_PYROPHOSPHATES_IN_THE_CYTOSOL	http://www.gsea-msigdb.org/gsea/msigdb/cards/REACTOME_SYNTHESIS_OF_PYROPHOSPHATES_IN_THE_CYTOSOL	6	5.78985836715158	0.184680528439674	1
iPSC-CVPC	Arteria	c2.cp.reactome	REACTOME_SYNTHESIS_OF_PYROPHOSPHATES_IN_THE_CYTOSOL	http://www.gsea-msigdb.org/gsea/msigdb/cards/REACTOME_SYNTHESIS_OF_PYROPHOSPHATES_IN_THE_CYTOSOL	6	3.43989946228232	0.28787014889611	1
Heart	Arteria	c2.cp.reactome	REACTOME_SYNTHESIS_OF_PYROPHOSPHATES_IN_THE_CYTOSOL	http://www.gsea-msigdb.org/gsea/msigdb/cards/REACTOME_SYNTHESIS_OF_PYROPHOSPHATES_IN_THE_CYTOSOL	6	0	1	1
iPSC-CVPC	Heart	c2.cp.reactome	REACTOME_CELLULAR_HEXOSE_TRANSPORT	http://www.gsea-msigdb.org/gsea/msigdb/cards/REACTOME_CELLULAR_HEXOSE_TRANSPORT	10	0	1	1
iPSC-CVPC	Arteria	c2.cp.reactome	REACTOME_CELLULAR_HEXOSE_TRANSPORT	http://www.gsea-msigdb.org/gsea/msigdb/cards/REACTOME_CELLULAR_HEXOSE_TRANSPORT	10	0	1	1
Heart	Arteria	c2.cp.reactome	REACTOME_CELLULAR_HEXOSE_TRANSPORT	http://www.gsea-msigdb.org/gsea/msigdb/cards/REACTOME_CELLULAR_HEXOSE_TRANSPORT	10	0	1	1
Heart	Arteria	c2.cp.reactome	REACTOME_RHO_GTPASE_EFFECTORS	http://www.gsea-msigdb.org/gsea/msigdb/cards/REACTOME_RHO_GTPASE_EFFECTORS	169	1.20932262885442	0.683330822700687	1
iPSC-CVPC	Heart	c2.cp.reactome	REACTOME_METABOLISM_OF_STEROID_HORMONES	http://www.gsea-msigdb.org/gsea/msigdb/cards/REACTOME_METABOLISM_OF_STEROID_HORMONES	15	2.06680724487839	0.399898977839414	1
iPSC-CVPC	Arteria	c2.cp.reactome	REACTOME_METABOLISM_OF_STEROID_HORMONES	http://www.gsea-msigdb.org/gsea/msigdb/cards/REACTOME_METABOLISM_OF_STEROID_HORMONES	15	2.64851901897544	0.198220067025792	1
Heart	Arteria	c2.cp.reactome	REACTOME_METABOLISM_OF_STEROID_HORMONES	http://www.gsea-msigdb.org/gsea/msigdb/cards/REACTOME_METABOLISM_OF_STEROID_HORMONES	15	0	1	1
iPSC-CVPC	Heart	c2.cp.reactome	REACTOME_PREGNENOLONE_BIOSYNTHESIS	http://www.gsea-msigdb.org/gsea/msigdb/cards/REACTOME_PREGNENOLONE_BIOSYNTHESIS	8	0	1	1
iPSC-CVPC	Arteria	c2.cp.reactome	REACTOME_PREGNENOLONE_BIOSYNTHESIS	http://www.gsea-msigdb.org/gsea/msigdb/cards/REACTOME_PREGNENOLONE_BIOSYNTHESIS	8	5.74157083776417	0.0678123645213366	1
iPSC-CVPC	Arteria	c2.cp.reactome	REACTOME_METABOLISM_OF_FOLATE_AND_PTERINES	http://www.gsea-msigdb.org/gsea/msigdb/cards/REACTOME_METABOLISM_OF_FOLATE_AND_PTERINES	15	1.22766633681219	0.572202813746029	1
iPSC-CVPC	Heart	c2.cp.reactome	REACTOME_VITAMIN_C_ASCORBATE_METABOLISM	http://www.gsea-msigdb.org/gsea/msigdb/cards/REACTOME_VITAMIN_C_ASCORBATE_METABOLISM	2	28.960448935877	0.0657819806483903	1
iPSC-CVPC	Arteria	c2.cp.reactome	REACTOME_CARNITINE_METABOLISM	http://www.gsea-msigdb.org/gsea/msigdb/cards/REACTOME_CARNITINE_METABOLISM	10	1.91058868467145	0.432170553786081	1
iPSC-CVPC	Heart	c2.cp.reactome	REACTOME_TCF_DEPENDENT_SIGNALING_IN_RESPONSE_TO_WNT	http://www.gsea-msigdb.org/gsea/msigdb/cards/REACTOME_TCF_DEPENDENT_SIGNALING_IN_RESPONSE_TO_WNT	115	0.50870684119108	0.595424566647905	1
iPSC-CVPC	Arteria	c2.cp.reactome	REACTOME_TCF_DEPENDENT_SIGNALING_IN_RESPONSE_TO_WNT	http://www.gsea-msigdb.org/gsea/msigdb/cards/REACTOME_TCF_DEPENDENT_SIGNALING_IN_RESPONSE_TO_WNT	115	1.46593883552725	0.297655292498188	1
iPSC-CVPC	Heart	c2.cp.reactome	REACTOME_FORMATION_OF_THE_BETA_CATENIN_TCF_TRANSACTIVATING_COMPLEX	http://www.gsea-msigdb.org/gsea/msigdb/cards/REACTOME_FORMATION_OF_THE_BETA_CATENIN_TCF_TRANSACTIVATING_COMPLEX	35	0	0.631287551450278	1
iPSC-CVPC	Arteria	c2.cp.reactome	REACTOME_FORMATION_OF_THE_BETA_CATENIN_TCF_TRANSACTIVATING_COMPLEX	http://www.gsea-msigdb.org/gsea/msigdb/cards/REACTOME_FORMATION_OF_THE_BETA_CATENIN_TCF_TRANSACTIVATING_COMPLEX	35	1.61387224861475	0.439936494432254	1
iPSC-CVPC	Heart	c2.cp.reactome	REACTOME_ASSEMBLY_OF_COLLAGEN_FIBRILS_AND_OTHER_MULTIMERIC_STRUCTURES	http://www.gsea-msigdb.org/gsea/msigdb/cards/REACTOME_ASSEMBLY_OF_COLLAGEN_FIBRILS_AND_OTHER_MULTIMERIC_STRUCTURES	40	1.52369200407092	0.388775464725858	1
iPSC-CVPC	Arteria	c2.cp.reactome	REACTOME_ASSEMBLY_OF_COLLAGEN_FIBRILS_AND_OTHER_MULTIMERIC_STRUCTURES	http://www.gsea-msigdb.org/gsea/msigdb/cards/REACTOME_ASSEMBLY_OF_COLLAGEN_FIBRILS_AND_OTHER_MULTIMERIC_STRUCTURES	40	1.91526892419983	0.279364275378532	1
Heart	Arteria	c2.cp.reactome	REACTOME_DERMATAN_SULFATE_BIOSYNTHESIS	http://www.gsea-msigdb.org/gsea/msigdb/cards/REACTOME_DERMATAN_SULFATE_BIOSYNTHESIS	5	0	1	1
iPSC-CVPC	Heart	c2.cp.reactome	REACTOME_CALCINEURIN_ACTIVATES_NFAT	http://www.gsea-msigdb.org/gsea/msigdb/cards/REACTOME_CALCINEURIN_ACTIVATES_NFAT	6	0	1	1
iPSC-CVPC	Arteria	c2.cp.reactome	REACTOME_CALCINEURIN_ACTIVATES_NFAT	http://www.gsea-msigdb.org/gsea/msigdb/cards/REACTOME_CALCINEURIN_ACTIVATES_NFAT	6	0	1	1
iPSC-CVPC	Arteria	c2.cp.reactome	REACTOME_ROLE_OF_PHOSPHOLIPIDS_IN_PHAGOCYTOSIS	http://www.gsea-msigdb.org/gsea/msigdb/cards/REACTOME_ROLE_OF_PHOSPHOLIPIDS_IN_PHAGOCYTOSIS	17	0	1	1
Heart	Arteria	c2.cp.reactome	REACTOME_ROLE_OF_PHOSPHOLIPIDS_IN_PHAGOCYTOSIS	http://www.gsea-msigdb.org/gsea/msigdb/cards/REACTOME_ROLE_OF_PHOSPHOLIPIDS_IN_PHAGOCYTOSIS	17	0	1	1
iPSC-CVPC	Heart	c2.cp.reactome	REACTOME_ENOS_ACTIVATION	http://www.gsea-msigdb.org/gsea/msigdb/cards/REACTOME_ENOS_ACTIVATION	7	0	1	1
iPSC-CVPC	Arteria	c2.cp.reactome	REACTOME_ENOS_ACTIVATION	http://www.gsea-msigdb.org/gsea/msigdb/cards/REACTOME_ENOS_ACTIVATION	7	0	1	1
Heart	Arteria	c2.cp.reactome	REACTOME_ENOS_ACTIVATION	http://www.gsea-msigdb.org/gsea/msigdb/cards/REACTOME_ENOS_ACTIVATION	7	0	1	1
iPSC-CVPC	Heart	c2.cp.reactome	REACTOME_NOSTRIN_MEDIATED_ENOS_TRAFFICKING	http://www.gsea-msigdb.org/gsea/msigdb/cards/REACTOME_NOSTRIN_MEDIATED_ENOS_TRAFFICKING	4	0	1	1
iPSC-CVPC	Arteria	c2.cp.reactome	REACTOME_NOSTRIN_MEDIATED_ENOS_TRAFFICKING	http://www.gsea-msigdb.org/gsea/msigdb/cards/REACTOME_NOSTRIN_MEDIATED_ENOS_TRAFFICKING	4	5.73347995452449	0.202527703020063	1
Heart	Arteria	c2.cp.reactome	REACTOME_NOSTRIN_MEDIATED_ENOS_TRAFFICKING	http://www.gsea-msigdb.org/gsea/msigdb/cards/REACTOME_NOSTRIN_MEDIATED_ENOS_TRAFFICKING	4	33.7883467254945	0.0387800976138172	1
iPSC-CVPC	Arteria	c2.cp.reactome	REACTOME_LINOLEIC_ACID_LA_METABOLISM	http://www.gsea-msigdb.org/gsea/msigdb/cards/REACTOME_LINOLEIC_ACID_LA_METABOLISM	5	0	1	1
iPSC-CVPC	Heart	c2.cp.reactome	REACTOME_PHASE_I_FUNCTIONALIZATION_OF_COMPOUNDS	http://www.gsea-msigdb.org/gsea/msigdb/cards/REACTOME_PHASE_I_FUNCTIONALIZATION_OF_COMPOUNDS	35	2.72295539296338	0.11087450322766	1
iPSC-CVPC	Arteria	c2.cp.reactome	REACTOME_PHASE_I_FUNCTIONALIZATION_OF_COMPOUNDS	http://www.gsea-msigdb.org/gsea/msigdb/cards/REACTOME_PHASE_I_FUNCTIONALIZATION_OF_COMPOUNDS	35	2.22508347957981	0.123885459377282	1
iPSC-CVPC	Heart	c2.cp.reactome	REACTOME_EPIGENETIC_REGULATION_OF_GENE_EXPRESSION	http://www.gsea-msigdb.org/gsea/msigdb/cards/REACTOME_EPIGENETIC_REGULATION_OF_GENE_EXPRESSION	70	0.849058399860083	1	1
iPSC-CVPC	Arteria	c2.cp.reactome	REACTOME_EPIGENETIC_REGULATION_OF_GENE_EXPRESSION	http://www.gsea-msigdb.org/gsea/msigdb/cards/REACTOME_EPIGENETIC_REGULATION_OF_GENE_EXPRESSION	70	1.91999802138445	0.107872591035563	1
iPSC-CVPC	Arteria	c2.cp.reactome	REACTOME_EGFR_INTERACTS_WITH_PHOSPHOLIPASE_C_GAMMA	http://www.gsea-msigdb.org/gsea/msigdb/cards/REACTOME_EGFR_INTERACTS_WITH_PHOSPHOLIPASE_C_GAMMA	3	0	1	1
iPSC-CVPC	Heart	c2.cp.reactome	REACTOME_SYNTHESIS_OF_EPOXY_EET_AND_DIHYDROXYEICOSATRIENOIC_ACIDS_DHET	http://www.gsea-msigdb.org/gsea/msigdb/cards/REACTOME_SYNTHESIS_OF_EPOXY_EET_AND_DIHYDROXYEICOSATRIENOIC_ACIDS_DHET	3	0	1	1
iPSC-CVPC	Arteria	c2.cp.reactome	REACTOME_SYNTHESIS_OF_EPOXY_EET_AND_DIHYDROXYEICOSATRIENOIC_ACIDS_DHET	http://www.gsea-msigdb.org/gsea/msigdb/cards/REACTOME_SYNTHESIS_OF_EPOXY_EET_AND_DIHYDROXYEICOSATRIENOIC_ACIDS_DHET	3	0	1	1
iPSC-CVPC	Heart	c2.cp.reactome	REACTOME_SYNTHESIS_OF_5_EICOSATETRAENOIC_ACIDS	http://www.gsea-msigdb.org/gsea/msigdb/cards/REACTOME_SYNTHESIS_OF_5_EICOSATETRAENOIC_ACIDS	4	0	1	1
iPSC-CVPC	Arteria	c2.cp.reactome	REACTOME_SYNTHESIS_OF_5_EICOSATETRAENOIC_ACIDS	http://www.gsea-msigdb.org/gsea/msigdb/cards/REACTOME_SYNTHESIS_OF_5_EICOSATETRAENOIC_ACIDS	4	0	1	1
iPSC-CVPC	Heart	c2.cp.reactome	REACTOME_HYALURONAN_BIOSYNTHESIS_AND_EXPORT	http://www.gsea-msigdb.org/gsea/msigdb/cards/REACTOME_HYALURONAN_BIOSYNTHESIS_AND_EXPORT	2	28.960448935877	0.0657819806483903	1
iPSC-CVPC	Arteria	c2.cp.reactome	REACTOME_ACTIVATION_OF_PPARGC1A_PGC_1ALPHA_BY_PHOSPHORYLATION	http://www.gsea-msigdb.org/gsea/msigdb/cards/REACTOME_ACTIVATION_OF_PPARGC1A_PGC_1ALPHA_BY_PHOSPHORYLATION	7	0	1	1
Heart	Arteria	c2.cp.reactome	REACTOME_ACTIVATION_OF_PPARGC1A_PGC_1ALPHA_BY_PHOSPHORYLATION	http://www.gsea-msigdb.org/gsea/msigdb/cards/REACTOME_ACTIVATION_OF_PPARGC1A_PGC_1ALPHA_BY_PHOSPHORYLATION	7	16.9048670887581	0.0668841366367879	1
iPSC-CVPC	Arteria	c2.cp.reactome	REACTOME_SCAVENGING_OF_HEME_FROM_PLASMA	http://www.gsea-msigdb.org/gsea/msigdb/cards/REACTOME_SCAVENGING_OF_HEME_FROM_PLASMA	8	5.74157083776417	0.0678123645213366	1
Heart	Arteria	c2.cp.reactome	REACTOME_SCAVENGING_OF_HEME_FROM_PLASMA	http://www.gsea-msigdb.org/gsea/msigdb/cards/REACTOME_SCAVENGING_OF_HEME_FROM_PLASMA	8	0	1	1
iPSC-CVPC	Heart	c2.cp.reactome	REACTOME_NOTCH2_INTRACELLULAR_DOMAIN_REGULATES_TRANSCRIPTION	http://www.gsea-msigdb.org/gsea/msigdb/cards/REACTOME_NOTCH2_INTRACELLULAR_DOMAIN_REGULATES_TRANSCRIPTION	5	0	1	1
iPSC-CVPC	Arteria	c2.cp.reactome	REACTOME_NOTCH2_INTRACELLULAR_DOMAIN_REGULATES_TRANSCRIPTION	http://www.gsea-msigdb.org/gsea/msigdb/cards/REACTOME_NOTCH2_INTRACELLULAR_DOMAIN_REGULATES_TRANSCRIPTION	5	0	1	1
Heart	Arteria	c2.cp.reactome	REACTOME_NOTCH2_INTRACELLULAR_DOMAIN_REGULATES_TRANSCRIPTION	http://www.gsea-msigdb.org/gsea/msigdb/cards/REACTOME_NOTCH2_INTRACELLULAR_DOMAIN_REGULATES_TRANSCRIPTION	5	0	1	1
iPSC-CVPC	Arteria	c2.cp.reactome	REACTOME_MUCOPOLYSACCHARIDOSES	http://www.gsea-msigdb.org/gsea/msigdb/cards/REACTOME_MUCOPOLYSACCHARIDOSES	10	0	1	1
iPSC-CVPC	Heart	c2.cp.reactome	REACTOME_ANCHORING_FIBRIL_FORMATION	http://www.gsea-msigdb.org/gsea/msigdb/cards/REACTOME_ANCHORING_FIBRIL_FORMATION	9	0	1	1
iPSC-CVPC	Arteria	c2.cp.reactome	REACTOME_ANCHORING_FIBRIL_FORMATION	http://www.gsea-msigdb.org/gsea/msigdb/cards/REACTOME_ANCHORING_FIBRIL_FORMATION	9	2.14962403857217	0.399093657395531	1
Heart	Arteria	c2.cp.reactome	REACTOME_ANCHORING_FIBRIL_FORMATION	http://www.gsea-msigdb.org/gsea/msigdb/cards/REACTOME_ANCHORING_FIBRIL_FORMATION	9	0	1	1
iPSC-CVPC	Heart	c2.cp.reactome	REACTOME_DAP12_SIGNALING	http://www.gsea-msigdb.org/gsea/msigdb/cards/REACTOME_DAP12_SIGNALING	17	0	1	1
iPSC-CVPC	Arteria	c2.cp.reactome	REACTOME_DAP12_SIGNALING	http://www.gsea-msigdb.org/gsea/msigdb/cards/REACTOME_DAP12_SIGNALING	17	2.29512503823533	0.239511670216042	1
iPSC-CVPC	Heart	c2.cp.reactome	REACTOME_FC_EPSILON_RECEPTOR_FCERI_SIGNALING	http://www.gsea-msigdb.org/gsea/msigdb/cards/REACTOME_FC_EPSILON_RECEPTOR_FCERI_SIGNALING	86	0.686268425977464	1	1
iPSC-CVPC	Arteria	c2.cp.reactome	REACTOME_FC_EPSILON_RECEPTOR_FCERI_SIGNALING	http://www.gsea-msigdb.org/gsea/msigdb/cards/REACTOME_FC_EPSILON_RECEPTOR_FCERI_SIGNALING	86	1.5286896501535	0.239421321653361	1
Heart	Arteria	c2.cp.reactome	REACTOME_FC_EPSILON_RECEPTOR_FCERI_SIGNALING	http://www.gsea-msigdb.org/gsea/msigdb/cards/REACTOME_FC_EPSILON_RECEPTOR_FCERI_SIGNALING	86	1.18583716517329	0.574150911463621	1
iPSC-CVPC	Heart	c2.cp.reactome	REACTOME_ESTABLISHMENT_OF_SISTER_CHROMATID_COHESION	http://www.gsea-msigdb.org/gsea/msigdb/cards/REACTOME_ESTABLISHMENT_OF_SISTER_CHROMATID_COHESION	5	7.23719780199253	0.156451544699296	1
iPSC-CVPC	Arteria	c2.cp.reactome	REACTOME_ESTABLISHMENT_OF_SISTER_CHROMATID_COHESION	http://www.gsea-msigdb.org/gsea/msigdb/cards/REACTOME_ESTABLISHMENT_OF_SISTER_CHROMATID_COHESION	5	0	1	1
Heart	Arteria	c2.cp.reactome	REACTOME_ESTABLISHMENT_OF_SISTER_CHROMATID_COHESION	http://www.gsea-msigdb.org/gsea/msigdb/cards/REACTOME_ESTABLISHMENT_OF_SISTER_CHROMATID_COHESION	5	0	1	1
iPSC-CVPC	Heart	c2.cp.reactome	REACTOME_THE_PHOTOTRANSDUCTION_CASCADE	http://www.gsea-msigdb.org/gsea/msigdb/cards/REACTOME_THE_PHOTOTRANSDUCTION_CASCADE	11	0	1	1
iPSC-CVPC	Arteria	c2.cp.reactome	REACTOME_THE_PHOTOTRANSDUCTION_CASCADE	http://www.gsea-msigdb.org/gsea/msigdb/cards/REACTOME_THE_PHOTOTRANSDUCTION_CASCADE	11	0	1	1
iPSC-CVPC	Heart	c2.cp.reactome	REACTOME_MITOTIC_METAPHASE_AND_ANAPHASE	http://www.gsea-msigdb.org/gsea/msigdb/cards/REACTOME_MITOTIC_METAPHASE_AND_ANAPHASE	150	2.32738867138723	0.0177601421552602	1
iPSC-CVPC	Heart	c2.cp.reactome	REACTOME_SENESCENCE_ASSOCIATED_SECRETORY_PHENOTYPE_SASP	http://www.gsea-msigdb.org/gsea/msigdb/cards/REACTOME_SENESCENCE_ASSOCIATED_SECRETORY_PHENOTYPE_SASP	46	0.641155298706426	1	1
iPSC-CVPC	Arteria	c2.cp.reactome	REACTOME_SENESCENCE_ASSOCIATED_SECRETORY_PHENOTYPE_SASP	http://www.gsea-msigdb.org/gsea/msigdb/cards/REACTOME_SENESCENCE_ASSOCIATED_SECRETORY_PHENOTYPE_SASP	46	2.59320520293577	0.0389371640992187	1
iPSC-CVPC	Heart	c2.cp.reactome	REACTOME_CELLULAR_SENESCENCE	http://www.gsea-msigdb.org/gsea/msigdb/cards/REACTOME_CELLULAR_SENESCENCE	102	0.575568539842664	0.777717299677881	1
iPSC-CVPC	Arteria	c2.cp.reactome	REACTOME_CELLULAR_SENESCENCE	http://www.gsea-msigdb.org/gsea/msigdb/cards/REACTOME_CELLULAR_SENESCENCE	102	1.8825995150389	0.0747415419708424	1
iPSC-CVPC	Heart	c2.cp.reactome	REACTOME_DNA_DAMAGE_TELOMERE_STRESS_INDUCED_SENESCENCE	http://www.gsea-msigdb.org/gsea/msigdb/cards/REACTOME_DNA_DAMAGE_TELOMERE_STRESS_INDUCED_SENESCENCE	30	0	0.62534481433129	1
iPSC-CVPC	Arteria	c2.cp.reactome	REACTOME_DNA_DAMAGE_TELOMERE_STRESS_INDUCED_SENESCENCE	http://www.gsea-msigdb.org/gsea/msigdb/cards/REACTOME_DNA_DAMAGE_TELOMERE_STRESS_INDUCED_SENESCENCE	30	1.22805552807341	0.67993925153734	1
Heart	Arteria	c2.cp.reactome	REACTOME_DNA_DAMAGE_TELOMERE_STRESS_INDUCED_SENESCENCE	http://www.gsea-msigdb.org/gsea/msigdb/cards/REACTOME_DNA_DAMAGE_TELOMERE_STRESS_INDUCED_SENESCENCE	30	0	1	1
iPSC-CVPC	Heart	c2.cp.reactome	REACTOME_TRIF_MEDIATED_PROGRAMMED_CELL_DEATH	http://www.gsea-msigdb.org/gsea/msigdb/cards/REACTOME_TRIF_MEDIATED_PROGRAMMED_CELL_DEATH	6	0	1	1
iPSC-CVPC	Heart	c2.cp.reactome	REACTOME_REGULATION_OF_PLK1_ACTIVITY_AT_G2_M_TRANSITION	http://www.gsea-msigdb.org/gsea/msigdb/cards/REACTOME_REGULATION_OF_PLK1_ACTIVITY_AT_G2_M_TRANSITION	61	1.49873564832318	0.459193996178364	1
iPSC-CVPC	Heart	c2.cp.reactome	REACTOME_INSULIN_PROCESSING	http://www.gsea-msigdb.org/gsea/msigdb/cards/REACTOME_INSULIN_PROCESSING	15	2.06680724487839	0.399898977839414	1
iPSC-CVPC	Arteria	c2.cp.reactome	REACTOME_INSULIN_PROCESSING	http://www.gsea-msigdb.org/gsea/msigdb/cards/REACTOME_INSULIN_PROCESSING	15	0	1	1
iPSC-CVPC	Arteria	c2.cp.reactome	REACTOME_SIGNALING_BY_NOTCH1_T_7_9_NOTCH1_M1580_K2555_TRANSLOCATION_MUTANT	http://www.gsea-msigdb.org/gsea/msigdb/cards/REACTOME_SIGNALING_BY_NOTCH1_T_7_9_NOTCH1_M1580_K2555_TRANSLOCATION_MUTANT	4	0	1	1
Heart	Arteria	c2.cp.reactome	REACTOME_SIGNALING_BY_NOTCH1_T_7_9_NOTCH1_M1580_K2555_TRANSLOCATION_MUTANT	http://www.gsea-msigdb.org/gsea/msigdb/cards/REACTOME_SIGNALING_BY_NOTCH1_T_7_9_NOTCH1_M1580_K2555_TRANSLOCATION_MUTANT	4	0	1	1
iPSC-CVPC	Heart	c2.cp.reactome	REACTOME_EPH_EPHRIN_SIGNALING	http://www.gsea-msigdb.org/gsea/msigdb/cards/REACTOME_EPH_EPHRIN_SIGNALING	59	1.01398652827641	1	1
iPSC-CVPC	Arteria	c2.cp.reactome	REACTOME_EPH_EPHRIN_SIGNALING	http://www.gsea-msigdb.org/gsea/msigdb/cards/REACTOME_EPH_EPHRIN_SIGNALING	59	1.25130254777545	0.565821756414865	1
iPSC-CVPC	Heart	c2.cp.reactome	REACTOME_FCERI_MEDIATED_NF_KB_ACTIVATION	http://www.gsea-msigdb.org/gsea/msigdb/cards/REACTOME_FCERI_MEDIATED_NF_KB_ACTIVATION	54	1.11201367705123	0.70221269525528	1
Heart	Arteria	c2.cp.reactome	REACTOME_FCERI_MEDIATED_NF_KB_ACTIVATION	http://www.gsea-msigdb.org/gsea/msigdb/cards/REACTOME_FCERI_MEDIATED_NF_KB_ACTIVATION	54	1.90750764172885	0.414456116599002	1
iPSC-CVPC	Heart	c2.cp.reactome	REACTOME_POU5F1_OCT4_SOX2_NANOG_ACTIVATE_GENES_RELATED_TO_PROLIFERATION	http://www.gsea-msigdb.org/gsea/msigdb/cards/REACTOME_POU5F1_OCT4_SOX2_NANOG_ACTIVATE_GENES_RELATED_TO_PROLIFERATION	3	0	1	1
iPSC-CVPC	Arteria	c2.cp.reactome	REACTOME_POU5F1_OCT4_SOX2_NANOG_ACTIVATE_GENES_RELATED_TO_PROLIFERATION	http://www.gsea-msigdb.org/gsea/msigdb/cards/REACTOME_POU5F1_OCT4_SOX2_NANOG_ACTIVATE_GENES_RELATED_TO_PROLIFERATION	3	0	1	1
Heart	Arteria	c2.cp.reactome	REACTOME_POU5F1_OCT4_SOX2_NANOG_ACTIVATE_GENES_RELATED_TO_PROLIFERATION	http://www.gsea-msigdb.org/gsea/msigdb/cards/REACTOME_POU5F1_OCT4_SOX2_NANOG_ACTIVATE_GENES_RELATED_TO_PROLIFERATION	3	0	1	1
iPSC-CVPC	Arteria	c2.cp.reactome	REACTOME_PEPTIDE_HORMONE_METABOLISM	http://www.gsea-msigdb.org/gsea/msigdb/cards/REACTOME_PEPTIDE_HORMONE_METABOLISM	37	0	0.266642283290259	1
Heart	Arteria	c2.cp.reactome	REACTOME_PEPTIDE_HORMONE_METABOLISM	http://www.gsea-msigdb.org/gsea/msigdb/cards/REACTOME_PEPTIDE_HORMONE_METABOLISM	37	0	1	1
iPSC-CVPC	Heart	c2.cp.reactome	REACTOME_NUCLEAR_ENVELOPE_BREAKDOWN	http://www.gsea-msigdb.org/gsea/msigdb/cards/REACTOME_NUCLEAR_ENVELOPE_BREAKDOWN	40	0.740220986443109	1	1
iPSC-CVPC	Arteria	c2.cp.reactome	REACTOME_NUCLEAR_ENVELOPE_BREAKDOWN	http://www.gsea-msigdb.org/gsea/msigdb/cards/REACTOME_NUCLEAR_ENVELOPE_BREAKDOWN	40	0.904010334555831	1	1
Heart	Arteria	c2.cp.reactome	REACTOME_NUCLEAR_ENVELOPE_BREAKDOWN	http://www.gsea-msigdb.org/gsea/msigdb/cards/REACTOME_NUCLEAR_ENVELOPE_BREAKDOWN	40	2.59549990629093	0.327123011964139	1
iPSC-CVPC	Heart	c2.cp.reactome	REACTOME_NON_INTEGRIN_MEMBRANE_ECM_INTERACTIONS	http://www.gsea-msigdb.org/gsea/msigdb/cards/REACTOME_NON_INTEGRIN_MEMBRANE_ECM_INTERACTIONS	44	0.671105563981413	1	1
iPSC-CVPC	Arteria	c2.cp.reactome	REACTOME_NON_INTEGRIN_MEMBRANE_ECM_INTERACTIONS	http://www.gsea-msigdb.org/gsea/msigdb/cards/REACTOME_NON_INTEGRIN_MEMBRANE_ECM_INTERACTIONS	44	1.72303857251004	0.304174149275118	1
iPSC-CVPC	Heart	c2.cp.reactome	REACTOME_SCAVENGING_BY_CLASS_B_RECEPTORS	http://www.gsea-msigdb.org/gsea/msigdb/cards/REACTOME_SCAVENGING_BY_CLASS_B_RECEPTORS	4	0	1	1
iPSC-CVPC	Arteria	c2.cp.reactome	REACTOME_SCAVENGING_BY_CLASS_B_RECEPTORS	http://www.gsea-msigdb.org/gsea/msigdb/cards/REACTOME_SCAVENGING_BY_CLASS_B_RECEPTORS	4	0	1	1
iPSC-CVPC	Heart	c2.cp.reactome	REACTOME_SCAVENGING_BY_CLASS_A_RECEPTORS	http://www.gsea-msigdb.org/gsea/msigdb/cards/REACTOME_SCAVENGING_BY_CLASS_A_RECEPTORS	12	2.6311276912316	0.335331830253007	1
iPSC-CVPC	Arteria	c2.cp.reactome	REACTOME_SCAVENGING_BY_CLASS_A_RECEPTORS	http://www.gsea-msigdb.org/gsea/msigdb/cards/REACTOME_SCAVENGING_BY_CLASS_A_RECEPTORS	12	3.44407057775882	0.138477997216538	1
Heart	Arteria	c2.cp.reactome	REACTOME_SUMO_IS_CONJUGATED_TO_E1_UBA2_SAE1	http://www.gsea-msigdb.org/gsea/msigdb/cards/REACTOME_SUMO_IS_CONJUGATED_TO_E1_UBA2_SAE1	1	0	1	1
iPSC-CVPC	Arteria	c2.cp.reactome	REACTOME_PKMTS_METHYLATE_HISTONE_LYSINES	http://www.gsea-msigdb.org/gsea/msigdb/cards/REACTOME_PKMTS_METHYLATE_HISTONE_LYSINES	39	0	0.274502832352151	1
iPSC-CVPC	Heart	c2.cp.reactome	REACTOME_HDMS_DEMETHYLATE_HISTONES	http://www.gsea-msigdb.org/gsea/msigdb/cards/REACTOME_HDMS_DEMETHYLATE_HISTONES	22	0	1	1
iPSC-CVPC	Arteria	c2.cp.reactome	REACTOME_HDMS_DEMETHYLATE_HISTONES	http://www.gsea-msigdb.org/gsea/msigdb/cards/REACTOME_HDMS_DEMETHYLATE_HISTONES	22	0.817903741612932	1	1
Heart	Arteria	c2.cp.reactome	REACTOME_PROCESSING_AND_ACTIVATION_OF_SUMO	http://www.gsea-msigdb.org/gsea/msigdb/cards/REACTOME_PROCESSING_AND_ACTIVATION_OF_SUMO	6	20.2802131643878	0.0576077528408082	1
iPSC-CVPC	Heart	c2.cp.reactome	REACTOME_GLYCOGEN_STORAGE_DISEASES	http://www.gsea-msigdb.org/gsea/msigdb/cards/REACTOME_GLYCOGEN_STORAGE_DISEASES	11	0	1	1
iPSC-CVPC	Arteria	c2.cp.reactome	REACTOME_GLYCOGEN_STORAGE_DISEASES	http://www.gsea-msigdb.org/gsea/msigdb/cards/REACTOME_GLYCOGEN_STORAGE_DISEASES	11	1.71933654701835	0.463429663316942	1
iPSC-CVPC	Heart	c2.cp.reactome	REACTOME_SUMOYLATION_OF_TRANSCRIPTION_FACTORS	http://www.gsea-msigdb.org/gsea/msigdb/cards/REACTOME_SUMOYLATION_OF_TRANSCRIPTION_FACTORS	12	0	1	1
iPSC-CVPC	Heart	c2.cp.reactome	REACTOME_SUMOYLATION_OF_UBIQUITINYLATION_PROTEINS	http://www.gsea-msigdb.org/gsea/msigdb/cards/REACTOME_SUMOYLATION_OF_UBIQUITINYLATION_PROTEINS	29	2.14661371779799	0.252954728065548	1
iPSC-CVPC	Arteria	c2.cp.reactome	REACTOME_SUMOYLATION_OF_UBIQUITINYLATION_PROTEINS	http://www.gsea-msigdb.org/gsea/msigdb/cards/REACTOME_SUMOYLATION_OF_UBIQUITINYLATION_PROTEINS	29	0.61300542962361	1	1
iPSC-CVPC	Heart	c2.cp.reactome	REACTOME_WNT_LIGAND_BIOGENESIS_AND_TRAFFICKING	http://www.gsea-msigdb.org/gsea/msigdb/cards/REACTOME_WNT_LIGAND_BIOGENESIS_AND_TRAFFICKING	7	0	1	1
iPSC-CVPC	Arteria	c2.cp.reactome	REACTOME_WNT_LIGAND_BIOGENESIS_AND_TRAFFICKING	http://www.gsea-msigdb.org/gsea/msigdb/cards/REACTOME_WNT_LIGAND_BIOGENESIS_AND_TRAFFICKING	7	2.86643075245736	0.32705832013432	1
iPSC-CVPC	Heart	c2.cp.reactome	REACTOME_IRF3_MEDIATED_INDUCTION_OF_TYPE_I_IFN	http://www.gsea-msigdb.org/gsea/msigdb/cards/REACTOME_IRF3_MEDIATED_INDUCTION_OF_TYPE_I_IFN	9	3.61846596404125	0.263839188119187	1
iPSC-CVPC	Arteria	c2.cp.reactome	REACTOME_IRF3_MEDIATED_INDUCTION_OF_TYPE_I_IFN	http://www.gsea-msigdb.org/gsea/msigdb/cards/REACTOME_IRF3_MEDIATED_INDUCTION_OF_TYPE_I_IFN	9	2.14962403857217	0.399093657395531	1
iPSC-CVPC	Heart	c2.cp.reactome	REACTOME_TRP_CHANNELS	http://www.gsea-msigdb.org/gsea/msigdb/cards/REACTOME_TRP_CHANNELS	12	0	1	1
iPSC-CVPC	Arteria	c2.cp.reactome	REACTOME_TRP_CHANNELS	http://www.gsea-msigdb.org/gsea/msigdb/cards/REACTOME_TRP_CHANNELS	12	0	1	1
iPSC-CVPC	Heart	c2.cp.reactome	REACTOME_DETOXIFICATION_OF_REACTIVE_OXYGEN_SPECIES	http://www.gsea-msigdb.org/gsea/msigdb/cards/REACTOME_DETOXIFICATION_OF_REACTIVE_OXYGEN_SPECIES	16	1.92888173685684	0.419999940957385	1
iPSC-CVPC	Arteria	c2.cp.reactome	REACTOME_DETOXIFICATION_OF_REACTIVE_OXYGEN_SPECIES	http://www.gsea-msigdb.org/gsea/msigdb/cards/REACTOME_DETOXIFICATION_OF_REACTIVE_OXYGEN_SPECIES	16	1.14571734678302	0.595764171255043	1
iPSC-CVPC	Heart	c2.cp.reactome	REACTOME_HSP90_CHAPERONE_CYCLE_FOR_STEROID_HORMONE_RECEPTORS_SHR	http://www.gsea-msigdb.org/gsea/msigdb/cards/REACTOME_HSP90_CHAPERONE_CYCLE_FOR_STEROID_HORMONE_RECEPTORS_SHR	22	1.37700733198433	0.527262127022268	1
iPSC-CVPC	Arteria	c2.cp.reactome	REACTOME_HSP90_CHAPERONE_CYCLE_FOR_STEROID_HORMONE_RECEPTORS_SHR	http://www.gsea-msigdb.org/gsea/msigdb/cards/REACTOME_HSP90_CHAPERONE_CYCLE_FOR_STEROID_HORMONE_RECEPTORS_SHR	22	0.817903741612932	1	1
iPSC-CVPC	Arteria	c2.cp.reactome	REACTOME_GRB2_SOS_PROVIDES_LINKAGE_TO_MAPK_SIGNALING_FOR_INTEGRINS	http://www.gsea-msigdb.org/gsea/msigdb/cards/REACTOME_GRB2_SOS_PROVIDES_LINKAGE_TO_MAPK_SIGNALING_FOR_INTEGRINS	10	1.91058868467145	0.432170553786081	1
Heart	Arteria	c2.cp.reactome	REACTOME_GRB2_SOS_PROVIDES_LINKAGE_TO_MAPK_SIGNALING_FOR_INTEGRINS	http://www.gsea-msigdb.org/gsea/msigdb/cards/REACTOME_GRB2_SOS_PROVIDES_LINKAGE_TO_MAPK_SIGNALING_FOR_INTEGRINS	10	11.2727384927875	0.0941740714908517	1
Heart	Arteria	c2.cp.reactome	REACTOME_DISEASES_ASSOCIATED_WITH_GLYCOSAMINOGLYCAN_METABOLISM	http://www.gsea-msigdb.org/gsea/msigdb/cards/REACTOME_DISEASES_ASSOCIATED_WITH_GLYCOSAMINOGLYCAN_METABOLISM	23	0	1	1
Heart	Arteria	c2.cp.reactome	REACTOME_DEFECTIVE_B4GALT7_CAUSES_EDS_PROGEROID_TYPE	http://www.gsea-msigdb.org/gsea/msigdb/cards/REACTOME_DEFECTIVE_B4GALT7_CAUSES_EDS_PROGEROID_TYPE	12	0	1	1
iPSC-CVPC	Arteria	c2.cp.reactome	REACTOME_DEFECTIVE_CHST3_CAUSES_SEDCJD	http://www.gsea-msigdb.org/gsea/msigdb/cards/REACTOME_DEFECTIVE_CHST3_CAUSES_SEDCJD	3	0	1	1
Heart	Arteria	c2.cp.reactome	REACTOME_DEFECTIVE_CHST3_CAUSES_SEDCJD	http://www.gsea-msigdb.org/gsea/msigdb/cards/REACTOME_DEFECTIVE_CHST3_CAUSES_SEDCJD	3	0	1	1
Heart	Arteria	c2.cp.reactome	REACTOME_DEFECTIVE_CHST14_CAUSES_EDS_MUSCULOCONTRACTURAL_TYPE	http://www.gsea-msigdb.org/gsea/msigdb/cards/REACTOME_DEFECTIVE_CHST14_CAUSES_EDS_MUSCULOCONTRACTURAL_TYPE	4	0	1	1
Heart	Arteria	c2.cp.reactome	REACTOME_DEFECTIVE_CHSY1_CAUSES_TPBS	http://www.gsea-msigdb.org/gsea/msigdb/cards/REACTOME_DEFECTIVE_CHSY1_CAUSES_TPBS	4	0	1	1
Heart	Arteria	c2.cp.reactome	REACTOME_DEFECTIVE_EXT2_CAUSES_EXOSTOSES_2	http://www.gsea-msigdb.org/gsea/msigdb/cards/REACTOME_DEFECTIVE_EXT2_CAUSES_EXOSTOSES_2	9	0	1	1
iPSC-CVPC	Heart	c2.cp.reactome	REACTOME_DEACTIVATION_OF_THE_BETA_CATENIN_TRANSACTIVATING_COMPLEX	http://www.gsea-msigdb.org/gsea/msigdb/cards/REACTOME_DEACTIVATION_OF_THE_BETA_CATENIN_TRANSACTIVATING_COMPLEX	32	0	0.626656654528323	1
iPSC-CVPC	Arteria	c2.cp.reactome	REACTOME_DEACTIVATION_OF_THE_BETA_CATENIN_TRANSACTIVATING_COMPLEX	http://www.gsea-msigdb.org/gsea/msigdb/cards/REACTOME_DEACTIVATION_OF_THE_BETA_CATENIN_TRANSACTIVATING_COMPLEX	32	1.14596644566813	0.695163098811092	1
iPSC-CVPC	Heart	c2.cp.reactome	REACTOME_NEGATIVE_REGULATION_OF_TCF_DEPENDENT_SIGNALING_BY_WNT_LIGAND_ANTAGONISTS	http://www.gsea-msigdb.org/gsea/msigdb/cards/REACTOME_NEGATIVE_REGULATION_OF_TCF_DEPENDENT_SIGNALING_BY_WNT_LIGAND_ANTAGONISTS	5	0	1	1
iPSC-CVPC	Arteria	c2.cp.reactome	REACTOME_NEGATIVE_REGULATION_OF_TCF_DEPENDENT_SIGNALING_BY_WNT_LIGAND_ANTAGONISTS	http://www.gsea-msigdb.org/gsea/msigdb/cards/REACTOME_NEGATIVE_REGULATION_OF_TCF_DEPENDENT_SIGNALING_BY_WNT_LIGAND_ANTAGONISTS	5	0	1	1
iPSC-CVPC	Arteria	c2.cp.reactome	REACTOME_DISEASES_ASSOCIATED_WITH_N_GLYCOSYLATION_OF_PROTEINS	http://www.gsea-msigdb.org/gsea/msigdb/cards/REACTOME_DISEASES_ASSOCIATED_WITH_N_GLYCOSYLATION_OF_PROTEINS	15	0	1	1
Heart	Arteria	c2.cp.reactome	REACTOME_DISEASES_ASSOCIATED_WITH_N_GLYCOSYLATION_OF_PROTEINS	http://www.gsea-msigdb.org/gsea/msigdb/cards/REACTOME_DISEASES_ASSOCIATED_WITH_N_GLYCOSYLATION_OF_PROTEINS	15	0	1	1
iPSC-CVPC	Heart	c2.cp.reactome	REACTOME_TACHYKININ_RECEPTORS_BIND_TACHYKININS	http://www.gsea-msigdb.org/gsea/msigdb/cards/REACTOME_TACHYKININ_RECEPTORS_BIND_TACHYKININS	1	0	1	1
iPSC-CVPC	Arteria	c2.cp.reactome	REACTOME_TACHYKININ_RECEPTORS_BIND_TACHYKININS	http://www.gsea-msigdb.org/gsea/msigdb/cards/REACTOME_TACHYKININ_RECEPTORS_BIND_TACHYKININS	1	0	1	1
Heart	Arteria	c2.cp.reactome	REACTOME_TACHYKININ_RECEPTORS_BIND_TACHYKININS	http://www.gsea-msigdb.org/gsea/msigdb/cards/REACTOME_TACHYKININ_RECEPTORS_BIND_TACHYKININS	1	0	1	1
Heart	Arteria	c2.cp.reactome	REACTOME_BETA_OXIDATION_OF_PRISTANOYL_COA	http://www.gsea-msigdb.org/gsea/msigdb/cards/REACTOME_BETA_OXIDATION_OF_PRISTANOYL_COA	7	0	1	1
iPSC-CVPC	Heart	c2.cp.reactome	REACTOME_SUMOYLATION_OF_TRANSCRIPTION_COFACTORS	http://www.gsea-msigdb.org/gsea/msigdb/cards/REACTOME_SUMOYLATION_OF_TRANSCRIPTION_COFACTORS	34	0.875307657216244	1	1
iPSC-CVPC	Arteria	c2.cp.reactome	REACTOME_SUMOYLATION_OF_TRANSCRIPTION_COFACTORS	http://www.gsea-msigdb.org/gsea/msigdb/cards/REACTOME_SUMOYLATION_OF_TRANSCRIPTION_COFACTORS	34	1.07410632471942	0.710803280946435	1
iPSC-CVPC	Arteria	c2.cp.reactome	REACTOME_MUSCARINIC_ACETYLCHOLINE_RECEPTORS	http://www.gsea-msigdb.org/gsea/msigdb/cards/REACTOME_MUSCARINIC_ACETYLCHOLINE_RECEPTORS	1	0	1	1
Heart	Arteria	c2.cp.reactome	REACTOME_MUSCARINIC_ACETYLCHOLINE_RECEPTORS	http://www.gsea-msigdb.org/gsea/msigdb/cards/REACTOME_MUSCARINIC_ACETYLCHOLINE_RECEPTORS	1	0	1	1
iPSC-CVPC	Heart	c2.cp.reactome	REACTOME_SIGNAL_REGULATORY_PROTEIN_FAMILY_INTERACTIONS	http://www.gsea-msigdb.org/gsea/msigdb/cards/REACTOME_SIGNAL_REGULATORY_PROTEIN_FAMILY_INTERACTIONS	9	0	1	1
iPSC-CVPC	Arteria	c2.cp.reactome	REACTOME_SIGNAL_REGULATORY_PROTEIN_FAMILY_INTERACTIONS	http://www.gsea-msigdb.org/gsea/msigdb/cards/REACTOME_SIGNAL_REGULATORY_PROTEIN_FAMILY_INTERACTIONS	9	2.14962403857217	0.399093657395531	1
iPSC-CVPC	Arteria	c2.cp.reactome	REACTOME_LEUKOTRIENE_RECEPTORS	http://www.gsea-msigdb.org/gsea/msigdb/cards/REACTOME_LEUKOTRIENE_RECEPTORS	2	0	1	1
Heart	Arteria	c2.cp.reactome	REACTOME_LEUKOTRIENE_RECEPTORS	http://www.gsea-msigdb.org/gsea/msigdb/cards/REACTOME_LEUKOTRIENE_RECEPTORS	2	0	1	1
iPSC-CVPC	Heart	c2.cp.reactome	REACTOME_EPHB_MEDIATED_FORWARD_SIGNALING	http://www.gsea-msigdb.org/gsea/msigdb/cards/REACTOME_EPHB_MEDIATED_FORWARD_SIGNALING	28	0	1	1
iPSC-CVPC	Arteria	c2.cp.reactome	REACTOME_EPHB_MEDIATED_FORWARD_SIGNALING	http://www.gsea-msigdb.org/gsea/msigdb/cards/REACTOME_EPHB_MEDIATED_FORWARD_SIGNALING	28	0.635772124197762	1	1
iPSC-CVPC	Heart	c2.cp.reactome	REACTOME_SYNTHESIS_SECRETION_AND_INACTIVATION_OF_GLUCOSE_DEPENDENT_INSULINOTROPIC_POLYPEPTIDE_GIP	http://www.gsea-msigdb.org/gsea/msigdb/cards/REACTOME_SYNTHESIS_SECRETION_AND_INACTIVATION_OF_GLUCOSE_DEPENDENT_INSULINOTROPIC_POLYPEPTIDE_GIP	5	0	1	1
Heart	Arteria	c2.cp.reactome	REACTOME_SYNTHESIS_SECRETION_AND_INACTIVATION_OF_GLUCOSE_DEPENDENT_INSULINOTROPIC_POLYPEPTIDE_GIP	http://www.gsea-msigdb.org/gsea/msigdb/cards/REACTOME_SYNTHESIS_SECRETION_AND_INACTIVATION_OF_GLUCOSE_DEPENDENT_INSULINOTROPIC_POLYPEPTIDE_GIP	5	0	1	1
iPSC-CVPC	Heart	c2.cp.reactome	REACTOME_CA2_PATHWAY	http://www.gsea-msigdb.org/gsea/msigdb/cards/REACTOME_CA2_PATHWAY	37	0	0.635870978760966	1
iPSC-CVPC	Arteria	c2.cp.reactome	REACTOME_CA2_PATHWAY	http://www.gsea-msigdb.org/gsea/msigdb/cards/REACTOME_CA2_PATHWAY	37	0	0.266642283290259	1
iPSC-CVPC	Heart	c2.cp.reactome	REACTOME_NETRIN_MEDIATED_REPULSION_SIGNALS	http://www.gsea-msigdb.org/gsea/msigdb/cards/REACTOME_NETRIN_MEDIATED_REPULSION_SIGNALS	3	0	1	1
iPSC-CVPC	Arteria	c2.cp.reactome	REACTOME_NETRIN_MEDIATED_REPULSION_SIGNALS	http://www.gsea-msigdb.org/gsea/msigdb/cards/REACTOME_NETRIN_MEDIATED_REPULSION_SIGNALS	3	0	1	1
iPSC-CVPC	Heart	c2.cp.reactome	REACTOME_ROLE_OF_SECOND_MESSENGERS_IN_NETRIN_1_SIGNALING	http://www.gsea-msigdb.org/gsea/msigdb/cards/REACTOME_ROLE_OF_SECOND_MESSENGERS_IN_NETRIN_1_SIGNALING	4	0	1	1
iPSC-CVPC	Arteria	c2.cp.reactome	REACTOME_ROLE_OF_SECOND_MESSENGERS_IN_NETRIN_1_SIGNALING	http://www.gsea-msigdb.org/gsea/msigdb/cards/REACTOME_ROLE_OF_SECOND_MESSENGERS_IN_NETRIN_1_SIGNALING	4	0	1	1
iPSC-CVPC	Arteria	c2.cp.reactome	REACTOME_CALCITONIN_LIKE_LIGAND_RECEPTORS	http://www.gsea-msigdb.org/gsea/msigdb/cards/REACTOME_CALCITONIN_LIKE_LIGAND_RECEPTORS	3	0	1	1
Heart	Arteria	c2.cp.reactome	REACTOME_CALCITONIN_LIKE_LIGAND_RECEPTORS	http://www.gsea-msigdb.org/gsea/msigdb/cards/REACTOME_CALCITONIN_LIKE_LIGAND_RECEPTORS	3	0	1	1
iPSC-CVPC	Heart	c2.cp.reactome	REACTOME_ORGANIC_ANION_TRANSPORTERS	http://www.gsea-msigdb.org/gsea/msigdb/cards/REACTOME_ORGANIC_ANION_TRANSPORTERS	2	0	1	1
iPSC-CVPC	Arteria	c2.cp.reactome	REACTOME_ORGANIC_ANION_TRANSPORTERS	http://www.gsea-msigdb.org/gsea/msigdb/cards/REACTOME_ORGANIC_ANION_TRANSPORTERS	2	0	1	1
iPSC-CVPC	Heart	c2.cp.reactome	REACTOME_ROLE_OF_ABL_IN_ROBO_SLIT_SIGNALING	http://www.gsea-msigdb.org/gsea/msigdb/cards/REACTOME_ROLE_OF_ABL_IN_ROBO_SLIT_SIGNALING	5	0	1	1
iPSC-CVPC	Heart	c2.cp.reactome	REACTOME_GP1B_IX_V_ACTIVATION_SIGNALLING	http://www.gsea-msigdb.org/gsea/msigdb/cards/REACTOME_GP1B_IX_V_ACTIVATION_SIGNALLING	6	0	1	1
iPSC-CVPC	Arteria	c2.cp.reactome	REACTOME_GP1B_IX_V_ACTIVATION_SIGNALLING	http://www.gsea-msigdb.org/gsea/msigdb/cards/REACTOME_GP1B_IX_V_ACTIVATION_SIGNALLING	6	0	1	1
iPSC-CVPC	Heart	c2.cp.reactome	REACTOME_FATTY_ACIDS_BOUND_TO_GPR40_FFAR1_REGULATE_INSULIN_SECRETION	http://www.gsea-msigdb.org/gsea/msigdb/cards/REACTOME_FATTY_ACIDS_BOUND_TO_GPR40_FFAR1_REGULATE_INSULIN_SECRETION	3	0	1	1
iPSC-CVPC	Arteria	c2.cp.reactome	REACTOME_FATTY_ACIDS_BOUND_TO_GPR40_FFAR1_REGULATE_INSULIN_SECRETION	http://www.gsea-msigdb.org/gsea/msigdb/cards/REACTOME_FATTY_ACIDS_BOUND_TO_GPR40_FFAR1_REGULATE_INSULIN_SECRETION	3	0	1	1
iPSC-CVPC	Heart	c2.cp.reactome	REACTOME_UNBLOCKING_OF_NMDA_RECEPTORS_GLUTAMATE_BINDING_AND_ACTIVATION	http://www.gsea-msigdb.org/gsea/msigdb/cards/REACTOME_UNBLOCKING_OF_NMDA_RECEPTORS_GLUTAMATE_BINDING_AND_ACTIVATION	14	4.83652153478667	0.077905570291198	1
iPSC-CVPC	Arteria	c2.cp.reactome	REACTOME_UNBLOCKING_OF_NMDA_RECEPTORS_GLUTAMATE_BINDING_AND_ACTIVATION	http://www.gsea-msigdb.org/gsea/msigdb/cards/REACTOME_UNBLOCKING_OF_NMDA_RECEPTORS_GLUTAMATE_BINDING_AND_ACTIVATION	14	1.32222215691555	0.547270630631346	1
iPSC-CVPC	Heart	c2.cp.reactome	REACTOME_DEPOLYMERISATION_OF_THE_NUCLEAR_LAMINA	http://www.gsea-msigdb.org/gsea/msigdb/cards/REACTOME_DEPOLYMERISATION_OF_THE_NUCLEAR_LAMINA	12	0	1	1
iPSC-CVPC	Arteria	c2.cp.reactome	REACTOME_ACTIVATION_OF_NMDA_RECEPTORS_AND_POSTSYNAPTIC_EVENTS	http://www.gsea-msigdb.org/gsea/msigdb/cards/REACTOME_ACTIVATION_OF_NMDA_RECEPTORS_AND_POSTSYNAPTIC_EVENTS	56	0.311252719308097	0.371820951872764	1
iPSC-CVPC	Arteria	c2.cp.reactome	REACTOME_INTERLEUKIN_1_FAMILY_SIGNALING	http://www.gsea-msigdb.org/gsea/msigdb/cards/REACTOME_INTERLEUKIN_1_FAMILY_SIGNALING	86	0.837058474943959	1	1
Heart	Arteria	c2.cp.reactome	REACTOME_NEUROFASCIN_INTERACTIONS	http://www.gsea-msigdb.org/gsea/msigdb/cards/REACTOME_NEUROFASCIN_INTERACTIONS	5	0	1	1
iPSC-CVPC	Heart	c2.cp.reactome	REACTOME_INTERLEUKIN_12_FAMILY_SIGNALING	http://www.gsea-msigdb.org/gsea/msigdb/cards/REACTOME_INTERLEUKIN_12_FAMILY_SIGNALING	28	1.07039768170171	0.614732962562752	1
iPSC-CVPC	Heart	c2.cp.reactome	REACTOME_INTERLEUKIN_2_FAMILY_SIGNALING	http://www.gsea-msigdb.org/gsea/msigdb/cards/REACTOME_INTERLEUKIN_2_FAMILY_SIGNALING	25	1.20456327569562	0.573226453847344	1
iPSC-CVPC	Arteria	c2.cp.reactome	REACTOME_INTERLEUKIN_2_FAMILY_SIGNALING	http://www.gsea-msigdb.org/gsea/msigdb/cards/REACTOME_INTERLEUKIN_2_FAMILY_SIGNALING	25	1.49571305274151	0.646007893234488	1
iPSC-CVPC	Heart	c2.cp.reactome	REACTOME_TRANSCRIPTIONAL_REGULATION_OF_PLURIPOTENT_STEM_CELLS	http://www.gsea-msigdb.org/gsea/msigdb/cards/REACTOME_TRANSCRIPTIONAL_REGULATION_OF_PLURIPOTENT_STEM_CELLS	11	0	1	1
iPSC-CVPC	Arteria	c2.cp.reactome	REACTOME_TRANSCRIPTIONAL_REGULATION_OF_PLURIPOTENT_STEM_CELLS	http://www.gsea-msigdb.org/gsea/msigdb/cards/REACTOME_TRANSCRIPTIONAL_REGULATION_OF_PLURIPOTENT_STEM_CELLS	11	0	1	1
iPSC-CVPC	Heart	c2.cp.reactome	REACTOME_ASYMMETRIC_LOCALIZATION_OF_PCP_PROTEINS	http://www.gsea-msigdb.org/gsea/msigdb/cards/REACTOME_ASYMMETRIC_LOCALIZATION_OF_PCP_PROTEINS	38	1.60865666571375	0.364672774608185	1
iPSC-CVPC	Arteria	c2.cp.reactome	REACTOME_ASYMMETRIC_LOCALIZATION_OF_PCP_PROTEINS	http://www.gsea-msigdb.org/gsea/msigdb/cards/REACTOME_ASYMMETRIC_LOCALIZATION_OF_PCP_PROTEINS	38	2.02827114511206	0.154167804451963	1
iPSC-CVPC	Arteria	c2.cp.reactome	REACTOME_SUMOYLATION_OF_DNA_REPLICATION_PROTEINS	http://www.gsea-msigdb.org/gsea/msigdb/cards/REACTOME_SUMOYLATION_OF_DNA_REPLICATION_PROTEINS	33	1.10888850915598	0.702948922892592	1
Heart	Arteria	c2.cp.reactome	REACTOME_SUMOYLATION_OF_DNA_REPLICATION_PROTEINS	http://www.gsea-msigdb.org/gsea/msigdb/cards/REACTOME_SUMOYLATION_OF_DNA_REPLICATION_PROTEINS	33	3.16519039056343	0.278736693159645	1
iPSC-CVPC	Arteria	c2.cp.reactome	REACTOME_DEGRADATION_OF_AXIN	http://www.gsea-msigdb.org/gsea/msigdb/cards/REACTOME_DEGRADATION_OF_AXIN	35	2.22508347957981	0.123885459377282	1
iPSC-CVPC	Heart	c2.cp.reactome	REACTOME_DISASSEMBLY_OF_THE_DESTRUCTION_COMPLEX_AND_RECRUITMENT_OF_AXIN_TO_THE_MEMBRANE	http://www.gsea-msigdb.org/gsea/msigdb/cards/REACTOME_DISASSEMBLY_OF_THE_DESTRUCTION_COMPLEX_AND_RECRUITMENT_OF_AXIN_TO_THE_MEMBRANE	17	0	1	1
iPSC-CVPC	Arteria	c2.cp.reactome	REACTOME_DISASSEMBLY_OF_THE_DESTRUCTION_COMPLEX_AND_RECRUITMENT_OF_AXIN_TO_THE_MEMBRANE	http://www.gsea-msigdb.org/gsea/msigdb/cards/REACTOME_DISASSEMBLY_OF_THE_DESTRUCTION_COMPLEX_AND_RECRUITMENT_OF_AXIN_TO_THE_MEMBRANE	17	0	1	1
iPSC-CVPC	Heart	c2.cp.reactome	REACTOME_REGULATION_OF_FZD_BY_UBIQUITINATION	http://www.gsea-msigdb.org/gsea/msigdb/cards/REACTOME_REGULATION_OF_FZD_BY_UBIQUITINATION	10	0	1	1
iPSC-CVPC	Arteria	c2.cp.reactome	REACTOME_REGULATION_OF_FZD_BY_UBIQUITINATION	http://www.gsea-msigdb.org/gsea/msigdb/cards/REACTOME_REGULATION_OF_FZD_BY_UBIQUITINATION	10	1.91058868467145	0.432170553786081	1
iPSC-CVPC	Heart	c2.cp.reactome	REACTOME_SUMOYLATION_OF_DNA_METHYLATION_PROTEINS	http://www.gsea-msigdb.org/gsea/msigdb/cards/REACTOME_SUMOYLATION_OF_DNA_METHYLATION_PROTEINS	10	0	1	1
iPSC-CVPC	Arteria	c2.cp.reactome	REACTOME_SUMOYLATION_OF_DNA_METHYLATION_PROTEINS	http://www.gsea-msigdb.org/gsea/msigdb/cards/REACTOME_SUMOYLATION_OF_DNA_METHYLATION_PROTEINS	10	1.91058868467145	0.432170553786081	1
iPSC-CVPC	Heart	c2.cp.reactome	REACTOME_SUMOYLATION_OF_IMMUNE_RESPONSE_PROTEINS	http://www.gsea-msigdb.org/gsea/msigdb/cards/REACTOME_SUMOYLATION_OF_IMMUNE_RESPONSE_PROTEINS	8	0	1	1
iPSC-CVPC	Arteria	c2.cp.reactome	REACTOME_SUMOYLATION_OF_IMMUNE_RESPONSE_PROTEINS	http://www.gsea-msigdb.org/gsea/msigdb/cards/REACTOME_SUMOYLATION_OF_IMMUNE_RESPONSE_PROTEINS	8	2.45677597834622	0.36409345665046	1
iPSC-CVPC	Heart	c2.cp.reactome	REACTOME_SIGNALING_BY_WNT_IN_CANCER	http://www.gsea-msigdb.org/gsea/msigdb/cards/REACTOME_SIGNALING_BY_WNT_IN_CANCER	19	0	1	1
iPSC-CVPC	Arteria	c2.cp.reactome	REACTOME_SIGNALING_BY_WNT_IN_CANCER	http://www.gsea-msigdb.org/gsea/msigdb/cards/REACTOME_SIGNALING_BY_WNT_IN_CANCER	19	0	0.622201972793475	1
Heart	Arteria	c2.cp.reactome	REACTOME_SIGNALING_BY_WNT_IN_CANCER	http://www.gsea-msigdb.org/gsea/msigdb/cards/REACTOME_SIGNALING_BY_WNT_IN_CANCER	19	0	1	1
iPSC-CVPC	Heart	c2.cp.reactome	REACTOME_PHOSPHORYLATION_SITE_MUTANTS_OF_CTNNB1_ARE_NOT_TARGETED_TO_THE_PROTEASOME_BY_THE_DESTRUCTION_COMPLEX	http://www.gsea-msigdb.org/gsea/msigdb/cards/REACTOME_PHOSPHORYLATION_SITE_MUTANTS_OF_CTNNB1_ARE_NOT_TARGETED_TO_THE_PROTEASOME_BY_THE_DESTRUCTION_COMPLEX	11	0	1	1
iPSC-CVPC	Arteria	c2.cp.reactome	REACTOME_PHOSPHORYLATION_SITE_MUTANTS_OF_CTNNB1_ARE_NOT_TARGETED_TO_THE_PROTEASOME_BY_THE_DESTRUCTION_COMPLEX	http://www.gsea-msigdb.org/gsea/msigdb/cards/REACTOME_PHOSPHORYLATION_SITE_MUTANTS_OF_CTNNB1_ARE_NOT_TARGETED_TO_THE_PROTEASOME_BY_THE_DESTRUCTION_COMPLEX	11	0	1	1
iPSC-CVPC	Arteria	c2.cp.reactome	REACTOME_INTERCONVERSION_OF_NUCLEOTIDE_DI_AND_TRIPHOSPHATES	http://www.gsea-msigdb.org/gsea/msigdb/cards/REACTOME_INTERCONVERSION_OF_NUCLEOTIDE_DI_AND_TRIPHOSPHATES	17	0	1	1
Heart	Arteria	c2.cp.reactome	REACTOME_INTERCONVERSION_OF_NUCLEOTIDE_DI_AND_TRIPHOSPHATES	http://www.gsea-msigdb.org/gsea/msigdb/cards/REACTOME_INTERCONVERSION_OF_NUCLEOTIDE_DI_AND_TRIPHOSPHATES	17	0	1	1
iPSC-CVPC	Arteria	c2.cp.reactome	REACTOME_PRESYNAPTIC_FUNCTION_OF_KAINATE_RECEPTORS	http://www.gsea-msigdb.org/gsea/msigdb/cards/REACTOME_PRESYNAPTIC_FUNCTION_OF_KAINATE_RECEPTORS	9	0	1	1
Heart	Arteria	c2.cp.reactome	REACTOME_PRESYNAPTIC_FUNCTION_OF_KAINATE_RECEPTORS	http://www.gsea-msigdb.org/gsea/msigdb/cards/REACTOME_PRESYNAPTIC_FUNCTION_OF_KAINATE_RECEPTORS	9	0	1	1
iPSC-CVPC	Heart	c2.cp.reactome	REACTOME_CASPASE_ACTIVATION_VIA_EXTRINSIC_APOPTOTIC_SIGNALLING_PATHWAY	http://www.gsea-msigdb.org/gsea/msigdb/cards/REACTOME_CASPASE_ACTIVATION_VIA_EXTRINSIC_APOPTOTIC_SIGNALLING_PATHWAY	18	1.70163520480477	0.458209802682747	1
iPSC-CVPC	Arteria	c2.cp.reactome	REACTOME_CASPASE_ACTIVATION_VIA_EXTRINSIC_APOPTOTIC_SIGNALLING_PATHWAY	http://www.gsea-msigdb.org/gsea/msigdb/cards/REACTOME_CASPASE_ACTIVATION_VIA_EXTRINSIC_APOPTOTIC_SIGNALLING_PATHWAY	18	0	0.621256050943545	1
iPSC-CVPC	Heart	c2.cp.reactome	REACTOME_TNFR1_INDUCED_PROAPOPTOTIC_SIGNALING	http://www.gsea-msigdb.org/gsea/msigdb/cards/REACTOME_TNFR1_INDUCED_PROAPOPTOTIC_SIGNALING	11	0	1	1
iPSC-CVPC	Arteria	c2.cp.reactome	REACTOME_TNFR1_INDUCED_PROAPOPTOTIC_SIGNALING	http://www.gsea-msigdb.org/gsea/msigdb/cards/REACTOME_TNFR1_INDUCED_PROAPOPTOTIC_SIGNALING	11	1.71933654701835	0.463429663316942	1
Heart	Arteria	c2.cp.reactome	REACTOME_PROGRAMMED_CELL_DEATH	http://www.gsea-msigdb.org/gsea/msigdb/cards/REACTOME_PROGRAMMED_CELL_DEATH	113	1.82920262191036	0.305642930348063	1
iPSC-CVPC	Heart	c2.cp.reactome	REACTOME_REGULATION_OF_TNFR1_SIGNALING	http://www.gsea-msigdb.org/gsea/msigdb/cards/REACTOME_REGULATION_OF_TNFR1_SIGNALING	29	2.14661371779799	0.252954728065548	1
iPSC-CVPC	Arteria	c2.cp.reactome	REACTOME_REGULATION_OF_TNFR1_SIGNALING	http://www.gsea-msigdb.org/gsea/msigdb/cards/REACTOME_REGULATION_OF_TNFR1_SIGNALING	29	1.27366032105861	0.67258211840505	1
Heart	Arteria	c2.cp.reactome	REACTOME_REGULATION_OF_TNFR1_SIGNALING	http://www.gsea-msigdb.org/gsea/msigdb/cards/REACTOME_REGULATION_OF_TNFR1_SIGNALING	29	0	1	1
iPSC-CVPC	Heart	c2.cp.reactome	REACTOME_TNFR1_INDUCED_NFKAPPAB_SIGNALING_PATHWAY	http://www.gsea-msigdb.org/gsea/msigdb/cards/REACTOME_TNFR1_INDUCED_NFKAPPAB_SIGNALING_PATHWAY	26	0	1	1
iPSC-CVPC	Arteria	c2.cp.reactome	REACTOME_TNFR1_INDUCED_NFKAPPAB_SIGNALING_PATHWAY	http://www.gsea-msigdb.org/gsea/msigdb/cards/REACTOME_TNFR1_INDUCED_NFKAPPAB_SIGNALING_PATHWAY	26	1.43325964912756	0.652109004375886	1
iPSC-CVPC	Arteria	c2.cp.reactome	REACTOME_RA_BIOSYNTHESIS_PATHWAY	http://www.gsea-msigdb.org/gsea/msigdb/cards/REACTOME_RA_BIOSYNTHESIS_PATHWAY	9	0	1	1
iPSC-CVPC	Arteria	c2.cp.reactome	REACTOME_DISEASES_OF_MISMATCH_REPAIR_MMR	http://www.gsea-msigdb.org/gsea/msigdb/cards/REACTOME_DISEASES_OF_MISMATCH_REPAIR_MMR	5	4.30013123953848	0.246404002422746	1
Heart	Arteria	c2.cp.reactome	REACTOME_DISEASES_OF_MISMATCH_REPAIR_MMR	http://www.gsea-msigdb.org/gsea/msigdb/cards/REACTOME_DISEASES_OF_MISMATCH_REPAIR_MMR	5	0	1	1
iPSC-CVPC	Heart	c2.cp.reactome	REACTOME_AFLATOXIN_ACTIVATION_AND_DETOXIFICATION	http://www.gsea-msigdb.org/gsea/msigdb/cards/REACTOME_AFLATOXIN_ACTIVATION_AND_DETOXIFICATION	6	5.78985836715158	0.184680528439674	1
iPSC-CVPC	Arteria	c2.cp.reactome	REACTOME_AFLATOXIN_ACTIVATION_AND_DETOXIFICATION	http://www.gsea-msigdb.org/gsea/msigdb/cards/REACTOME_AFLATOXIN_ACTIVATION_AND_DETOXIFICATION	6	0	1	1
iPSC-CVPC	Arteria	c2.cp.reactome	REACTOME_METABOLISM_OF_LIPIDS	http://www.gsea-msigdb.org/gsea/msigdb/cards/REACTOME_METABOLISM_OF_LIPIDS	448	0.971415370246169	1	1
iPSC-CVPC	Arteria	c2.cp.reactome	REACTOME_PHASE_0_RAPID_DEPOLARISATION	http://www.gsea-msigdb.org/gsea/msigdb/cards/REACTOME_PHASE_0_RAPID_DEPOLARISATION	20	0.904174230095951	1	1
Heart	Arteria	c2.cp.reactome	REACTOME_PHASE_0_RAPID_DEPOLARISATION	http://www.gsea-msigdb.org/gsea/msigdb/cards/REACTOME_PHASE_0_RAPID_DEPOLARISATION	20	11.3719083190974	0.016229275767711	1
iPSC-CVPC	Arteria	c2.cp.reactome	REACTOME_PHASE_1_INACTIVATION_OF_FAST_NA_CHANNELS	http://www.gsea-msigdb.org/gsea/msigdb/cards/REACTOME_PHASE_1_INACTIVATION_OF_FAST_NA_CHANNELS	3	0	1	1
Heart	Arteria	c2.cp.reactome	REACTOME_ION_HOMEOSTASIS	http://www.gsea-msigdb.org/gsea/msigdb/cards/REACTOME_ION_HOMEOSTASIS	32	3.26759187486025	0.271548704623366	1
iPSC-CVPC	Heart	c2.cp.reactome	REACTOME_METABOLIC_DISORDERS_OF_BIOLOGICAL_OXIDATION_ENZYMES	http://www.gsea-msigdb.org/gsea/msigdb/cards/REACTOME_METABOLIC_DISORDERS_OF_BIOLOGICAL_OXIDATION_ENZYMES	15	0	1	1
iPSC-CVPC	Heart	c2.cp.reactome	REACTOME_IKBA_VARIANT_LEADS_TO_EDA_ID	http://www.gsea-msigdb.org/gsea/msigdb/cards/REACTOME_IKBA_VARIANT_LEADS_TO_EDA_ID	7	0	1	1
Heart	Arteria	c2.cp.reactome	REACTOME_IKBA_VARIANT_LEADS_TO_EDA_ID	http://www.gsea-msigdb.org/gsea/msigdb/cards/REACTOME_IKBA_VARIANT_LEADS_TO_EDA_ID	7	0	1	1
iPSC-CVPC	Heart	c2.cp.reactome	REACTOME_CLEC7A_DECTIN_1_SIGNALING	http://www.gsea-msigdb.org/gsea/msigdb/cards/REACTOME_CLEC7A_DECTIN_1_SIGNALING	70	0.849058399860083	1	1
iPSC-CVPC	Arteria	c2.cp.reactome	REACTOME_CLEC7A_DECTIN_1_SIGNALING	http://www.gsea-msigdb.org/gsea/msigdb/cards/REACTOME_CLEC7A_DECTIN_1_SIGNALING	70	1.32443682557083	0.436837631927941	1
Heart	Arteria	c2.cp.reactome	REACTOME_ABC_TRANSPORTER_DISORDERS	http://www.gsea-msigdb.org/gsea/msigdb/cards/REACTOME_ABC_TRANSPORTER_DISORDERS	47	2.199313535807	0.372292157397756	1
iPSC-CVPC	Arteria	c2.cp.reactome	REACTOME_DISORDERS_OF_TRANSMEMBRANE_TRANSPORTERS	http://www.gsea-msigdb.org/gsea/msigdb/cards/REACTOME_DISORDERS_OF_TRANSMEMBRANE_TRANSPORTERS	101	1.28287030643733	0.50646182299956	1
Heart	Arteria	c2.cp.reactome	REACTOME_DISORDERS_OF_TRANSMEMBRANE_TRANSPORTERS	http://www.gsea-msigdb.org/gsea/msigdb/cards/REACTOME_DISORDERS_OF_TRANSMEMBRANE_TRANSPORTERS	101	1.00653842073595	1	1
iPSC-CVPC	Arteria	c2.cp.reactome	REACTOME_VXPX_CARGO_TARGETING_TO_CILIUM	http://www.gsea-msigdb.org/gsea/msigdb/cards/REACTOME_VXPX_CARGO_TARGETING_TO_CILIUM	12	0	1	1
iPSC-CVPC	Heart	c2.cp.reactome	REACTOME_BBSOME_MEDIATED_CARGO_TARGETING_TO_CILIUM	http://www.gsea-msigdb.org/gsea/msigdb/cards/REACTOME_BBSOME_MEDIATED_CARGO_TARGETING_TO_CILIUM	16	0	1	1
iPSC-CVPC	Arteria	c2.cp.reactome	REACTOME_BBSOME_MEDIATED_CARGO_TARGETING_TO_CILIUM	http://www.gsea-msigdb.org/gsea/msigdb/cards/REACTOME_BBSOME_MEDIATED_CARGO_TARGETING_TO_CILIUM	16	2.4592658079527	0.218782451110804	1
Heart	Arteria	c2.cp.reactome	REACTOME_BBSOME_MEDIATED_CARGO_TARGETING_TO_CILIUM	http://www.gsea-msigdb.org/gsea/msigdb/cards/REACTOME_BBSOME_MEDIATED_CARGO_TARGETING_TO_CILIUM	16	0	1	1
iPSC-CVPC	Heart	c2.cp.reactome	REACTOME_INTRAFLAGELLAR_TRANSPORT	http://www.gsea-msigdb.org/gsea/msigdb/cards/REACTOME_INTRAFLAGELLAR_TRANSPORT	35	0	0.631287551450278	1
iPSC-CVPC	Arteria	c2.cp.reactome	REACTOME_INTRAFLAGELLAR_TRANSPORT	http://www.gsea-msigdb.org/gsea/msigdb/cards/REACTOME_INTRAFLAGELLAR_TRANSPORT	35	1.04150225927059	0.718695057633147	1
Heart	Arteria	c2.cp.reactome	REACTOME_INTRAFLAGELLAR_TRANSPORT	http://www.gsea-msigdb.org/gsea/msigdb/cards/REACTOME_INTRAFLAGELLAR_TRANSPORT	35	0	1	1
iPSC-CVPC	Heart	c2.cp.reactome	REACTOME_DECTIN_2_FAMILY	http://www.gsea-msigdb.org/gsea/msigdb/cards/REACTOME_DECTIN_2_FAMILY	8	0	1	1
iPSC-CVPC	Arteria	c2.cp.reactome	REACTOME_DECTIN_2_FAMILY	http://www.gsea-msigdb.org/gsea/msigdb/cards/REACTOME_DECTIN_2_FAMILY	8	0	1	1
iPSC-CVPC	Arteria	c2.cp.reactome	REACTOME_C_TYPE_LECTIN_RECEPTORS_CLRS	http://www.gsea-msigdb.org/gsea/msigdb/cards/REACTOME_C_TYPE_LECTIN_RECEPTORS_CLRS	88	1.25986490242707	0.485355774470183	1
Heart	Arteria	c2.cp.reactome	REACTOME_C_TYPE_LECTIN_RECEPTORS_CLRS	http://www.gsea-msigdb.org/gsea/msigdb/cards/REACTOME_C_TYPE_LECTIN_RECEPTORS_CLRS	88	1.1583587943527	0.582556410990842	1
iPSC-CVPC	Heart	c2.cp.reactome	REACTOME_TRAFFICKING_OF_MYRISTOYLATED_PROTEINS_TO_THE_CILIUM	http://www.gsea-msigdb.org/gsea/msigdb/cards/REACTOME_TRAFFICKING_OF_MYRISTOYLATED_PROTEINS_TO_THE_CILIUM	1	0	1	1
iPSC-CVPC	Arteria	c2.cp.reactome	REACTOME_TRAFFICKING_OF_MYRISTOYLATED_PROTEINS_TO_THE_CILIUM	http://www.gsea-msigdb.org/gsea/msigdb/cards/REACTOME_TRAFFICKING_OF_MYRISTOYLATED_PROTEINS_TO_THE_CILIUM	1	0	1	1
iPSC-CVPC	Heart	c2.cp.reactome	REACTOME_RHO_GTPASES_ACTIVATE_PKNS	http://www.gsea-msigdb.org/gsea/msigdb/cards/REACTOME_RHO_GTPASES_ACTIVATE_PKNS	31	0	0.625805960900139	1
iPSC-CVPC	Arteria	c2.cp.reactome	REACTOME_RHO_GTPASES_ACTIVATE_PKNS	http://www.gsea-msigdb.org/gsea/msigdb/cards/REACTOME_RHO_GTPASES_ACTIVATE_PKNS	31	1.18559574515441	0.687480411644717	1
iPSC-CVPC	Heart	c2.cp.reactome	REACTOME_RHO_GTPASES_ACTIVATE_CIT	http://www.gsea-msigdb.org/gsea/msigdb/cards/REACTOME_RHO_GTPASES_ACTIVATE_CIT	13	0	1	1
iPSC-CVPC	Arteria	c2.cp.reactome	REACTOME_RHO_GTPASES_ACTIVATE_CIT	http://www.gsea-msigdb.org/gsea/msigdb/cards/REACTOME_RHO_GTPASES_ACTIVATE_CIT	13	0	1	1
iPSC-CVPC	Heart	c2.cp.reactome	REACTOME_RHO_GTPASES_ACTIVATE_KTN1	http://www.gsea-msigdb.org/gsea/msigdb/cards/REACTOME_RHO_GTPASES_ACTIVATE_KTN1	7	0	1	1
iPSC-CVPC	Arteria	c2.cp.reactome	REACTOME_RHO_GTPASES_ACTIVATE_KTN1	http://www.gsea-msigdb.org/gsea/msigdb/cards/REACTOME_RHO_GTPASES_ACTIVATE_KTN1	7	6.88959566708754	0.0527411214668516	1
iPSC-CVPC	Arteria	c2.cp.reactome	REACTOME_RHO_GTPASES_ACTIVATE_IQGAPS	http://www.gsea-msigdb.org/gsea/msigdb/cards/REACTOME_RHO_GTPASES_ACTIVATE_IQGAPS	18	2.15155712884977	0.260327334016662	1
iPSC-CVPC	Heart	c2.cp.reactome	REACTOME_LIGAND_RECEPTOR_INTERACTIONS	http://www.gsea-msigdb.org/gsea/msigdb/cards/REACTOME_LIGAND_RECEPTOR_INTERACTIONS	3	0	1	1
iPSC-CVPC	Heart	c2.cp.reactome	REACTOME_HEDGEHOG_ON_STATE	http://www.gsea-msigdb.org/gsea/msigdb/cards/REACTOME_HEDGEHOG_ON_STATE	54	1.11201367705123	0.70221269525528	1
iPSC-CVPC	Arteria	c2.cp.reactome	REACTOME_HEDGEHOG_ON_STATE	http://www.gsea-msigdb.org/gsea/msigdb/cards/REACTOME_HEDGEHOG_ON_STATE	54	1.37709270040982	0.540253360550226	1
Heart	Arteria	c2.cp.reactome	REACTOME_REGULATION_OF_TP53_ACTIVITY	http://www.gsea-msigdb.org/gsea/msigdb/cards/REACTOME_REGULATION_OF_TP53_ACTIVITY	114	0.889644965428064	1	1
Heart	Arteria	c2.cp.reactome	REACTOME_APEX1_INDEPENDENT_RESOLUTION_OF_AP_SITES_VIA_THE_SINGLE_NUCLEOTIDE_REPLACEMENT_PATHWAY	http://www.gsea-msigdb.org/gsea/msigdb/cards/REACTOME_APEX1_INDEPENDENT_RESOLUTION_OF_AP_SITES_VIA_THE_SINGLE_NUCLEOTIDE_REPLACEMENT_PATHWAY	7	0	1	1
iPSC-CVPC	Arteria	c2.cp.reactome	REACTOME_FRUCTOSE_METABOLISM	http://www.gsea-msigdb.org/gsea/msigdb/cards/REACTOME_FRUCTOSE_METABOLISM	5	4.30013123953848	0.246404002422746	1
Heart	Arteria	c2.cp.reactome	REACTOME_FRUCTOSE_METABOLISM	http://www.gsea-msigdb.org/gsea/msigdb/cards/REACTOME_FRUCTOSE_METABOLISM	5	0	1	1
iPSC-CVPC	Heart	c2.cp.reactome	REACTOME_PHOSPHOLIPASE_C_MEDIATED_CASCADE_FGFR2	http://www.gsea-msigdb.org/gsea/msigdb/cards/REACTOME_PHOSPHOLIPASE_C_MEDIATED_CASCADE_FGFR2	7	0	1	1
iPSC-CVPC	Arteria	c2.cp.reactome	REACTOME_PHOSPHOLIPASE_C_MEDIATED_CASCADE_FGFR2	http://www.gsea-msigdb.org/gsea/msigdb/cards/REACTOME_PHOSPHOLIPASE_C_MEDIATED_CASCADE_FGFR2	7	0	1	1
iPSC-CVPC	Heart	c2.cp.reactome	REACTOME_PHOSPHOLIPASE_C_MEDIATED_CASCADE_FGFR4	http://www.gsea-msigdb.org/gsea/msigdb/cards/REACTOME_PHOSPHOLIPASE_C_MEDIATED_CASCADE_FGFR4	4	0	1	1
iPSC-CVPC	Arteria	c2.cp.reactome	REACTOME_PHOSPHOLIPASE_C_MEDIATED_CASCADE_FGFR4	http://www.gsea-msigdb.org/gsea/msigdb/cards/REACTOME_PHOSPHOLIPASE_C_MEDIATED_CASCADE_FGFR4	4	0	1	1
iPSC-CVPC	Heart	c2.cp.reactome	REACTOME_PI_3K_CASCADE_FGFR2	http://www.gsea-msigdb.org/gsea/msigdb/cards/REACTOME_PI_3K_CASCADE_FGFR2	11	0	1	1
iPSC-CVPC	Arteria	c2.cp.reactome	REACTOME_PI_3K_CASCADE_FGFR2	http://www.gsea-msigdb.org/gsea/msigdb/cards/REACTOME_PI_3K_CASCADE_FGFR2	11	1.71933654701835	0.463429663316942	1
iPSC-CVPC	Heart	c2.cp.reactome	REACTOME_FRS_MEDIATED_FGFR2_SIGNALING	http://www.gsea-msigdb.org/gsea/msigdb/cards/REACTOME_FRS_MEDIATED_FGFR2_SIGNALING	11	0	1	1
iPSC-CVPC	Heart	c2.cp.reactome	REACTOME_FGFRL1_MODULATION_OF_FGFR1_SIGNALING	http://www.gsea-msigdb.org/gsea/msigdb/cards/REACTOME_FGFRL1_MODULATION_OF_FGFR1_SIGNALING	3	0	1	1
iPSC-CVPC	Heart	c2.cp.reactome	REACTOME_METALLOTHIONEINS_BIND_METALS	http://www.gsea-msigdb.org/gsea/msigdb/cards/REACTOME_METALLOTHIONEINS_BIND_METALS	2	0	1	1
iPSC-CVPC	Arteria	c2.cp.reactome	REACTOME_METALLOTHIONEINS_BIND_METALS	http://www.gsea-msigdb.org/gsea/msigdb/cards/REACTOME_METALLOTHIONEINS_BIND_METALS	2	17.194955231514	0.106977213866598	1
iPSC-CVPC	Heart	c2.cp.reactome	REACTOME_INFECTIOUS_DISEASE	http://www.gsea-msigdb.org/gsea/msigdb/cards/REACTOME_INFECTIOUS_DISEASE	347	1.415352074165	0.172344051661272	1
iPSC-CVPC	Arteria	c2.cp.reactome	REACTOME_INFECTIOUS_DISEASE	http://www.gsea-msigdb.org/gsea/msigdb/cards/REACTOME_INFECTIOUS_DISEASE	347	1.4098022425389	0.117754269137802	1
iPSC-CVPC	Heart	c2.cp.reactome	REACTOME_RHO_GTPASES_ACTIVATE_FORMINS	http://www.gsea-msigdb.org/gsea/msigdb/cards/REACTOME_RHO_GTPASES_ACTIVATE_FORMINS	84	1.44977494538701	0.366019549229571	1
iPSC-CVPC	Arteria	c2.cp.reactome	REACTOME_RHO_GTPASES_ACTIVATE_FORMINS	http://www.gsea-msigdb.org/gsea/msigdb/cards/REACTOME_RHO_GTPASES_ACTIVATE_FORMINS	84	0.858155727420424	1	1
iPSC-CVPC	Heart	c2.cp.reactome	REACTOME_TNFR2_NON_CANONICAL_NF_KB_PATHWAY	http://www.gsea-msigdb.org/gsea/msigdb/cards/REACTOME_TNFR2_NON_CANONICAL_NF_KB_PATHWAY	59	1.55255968552477	0.449563246193746	1
iPSC-CVPC	Arteria	c2.cp.reactome	REACTOME_TNFR2_NON_CANONICAL_NF_KB_PATHWAY	http://www.gsea-msigdb.org/gsea/msigdb/cards/REACTOME_TNFR2_NON_CANONICAL_NF_KB_PATHWAY	59	1.59592642166506	0.258257679907589	1
iPSC-CVPC	Arteria	c2.cp.reactome	REACTOME_RAF_ACTIVATION	http://www.gsea-msigdb.org/gsea/msigdb/cards/REACTOME_RAF_ACTIVATION	25	0.715455254776908	1	1
iPSC-CVPC	Heart	c2.cp.reactome	REACTOME_MAP2K_AND_MAPK_ACTIVATION	http://www.gsea-msigdb.org/gsea/msigdb/cards/REACTOME_MAP2K_AND_MAPK_ACTIVATION	28	1.07039768170171	0.614732962562752	1
iPSC-CVPC	Arteria	c2.cp.reactome	REACTOME_MAP2K_AND_MAPK_ACTIVATION	http://www.gsea-msigdb.org/gsea/msigdb/cards/REACTOME_MAP2K_AND_MAPK_ACTIVATION	28	0.635772124197762	1	1
Heart	Arteria	c2.cp.reactome	REACTOME_MAP2K_AND_MAPK_ACTIVATION	http://www.gsea-msigdb.org/gsea/msigdb/cards/REACTOME_MAP2K_AND_MAPK_ACTIVATION	28	7.86848835470865	0.0306882573202617	1
iPSC-CVPC	Heart	c2.cp.reactome	REACTOME_CONSTITUTIVE_SIGNALING_BY_AKT1_E17K_IN_CANCER	http://www.gsea-msigdb.org/gsea/msigdb/cards/REACTOME_CONSTITUTIVE_SIGNALING_BY_AKT1_E17K_IN_CANCER	21	4.84726596062379	0.0315742185098206	1
Heart	Arteria	c2.cp.reactome	REACTOME_CONSTITUTIVE_SIGNALING_BY_AKT1_E17K_IN_CANCER	http://www.gsea-msigdb.org/gsea/msigdb/cards/REACTOME_CONSTITUTIVE_SIGNALING_BY_AKT1_E17K_IN_CANCER	21	0	1	1
iPSC-CVPC	Heart	c2.cp.reactome	REACTOME_NEGATIVE_FEEDBACK_REGULATION_OF_MAPK_PATHWAY	http://www.gsea-msigdb.org/gsea/msigdb/cards/REACTOME_NEGATIVE_FEEDBACK_REGULATION_OF_MAPK_PATHWAY	6	0	1	1
iPSC-CVPC	Arteria	c2.cp.reactome	REACTOME_NEGATIVE_FEEDBACK_REGULATION_OF_MAPK_PATHWAY	http://www.gsea-msigdb.org/gsea/msigdb/cards/REACTOME_NEGATIVE_FEEDBACK_REGULATION_OF_MAPK_PATHWAY	6	0	1	1
iPSC-CVPC	Arteria	c2.cp.reactome	REACTOME_MAPK6_MAPK4_SIGNALING	http://www.gsea-msigdb.org/gsea/msigdb/cards/REACTOME_MAPK6_MAPK4_SIGNALING	60	1.9184161817074	0.143915966779449	1
Heart	Arteria	c2.cp.reactome	REACTOME_MAPK6_MAPK4_SIGNALING	http://www.gsea-msigdb.org/gsea/msigdb/cards/REACTOME_MAPK6_MAPK4_SIGNALING	60	1.71256076980322	0.448355323692107	1
iPSC-CVPC	Heart	c2.cp.reactome	REACTOME_JOSEPHIN_DOMAIN_DUBS	http://www.gsea-msigdb.org/gsea/msigdb/cards/REACTOME_JOSEPHIN_DOMAIN_DUBS	10	3.21625307367113	0.28848373142765	1
iPSC-CVPC	Arteria	c2.cp.reactome	REACTOME_JOSEPHIN_DOMAIN_DUBS	http://www.gsea-msigdb.org/gsea/msigdb/cards/REACTOME_JOSEPHIN_DOMAIN_DUBS	10	4.30576894340505	0.101401589880583	1
iPSC-CVPC	Heart	c2.cp.reactome	REACTOME_UB_SPECIFIC_PROCESSING_PROTEASES	http://www.gsea-msigdb.org/gsea/msigdb/cards/REACTOME_UB_SPECIFIC_PROCESSING_PROTEASES	121	0.732420240175869	0.800261966192752	1
iPSC-CVPC	Arteria	c2.cp.reactome	REACTOME_UB_SPECIFIC_PROCESSING_PROTEASES	http://www.gsea-msigdb.org/gsea/msigdb/cards/REACTOME_UB_SPECIFIC_PROCESSING_PROTEASES	121	1.55735185407717	0.222908734315148	1
iPSC-CVPC	Heart	c2.cp.reactome	REACTOME_OVARIAN_TUMOR_DOMAIN_PROTEASES	http://www.gsea-msigdb.org/gsea/msigdb/cards/REACTOME_OVARIAN_TUMOR_DOMAIN_PROTEASES	27	2.31879212823026	0.227950261196614	1
iPSC-CVPC	Arteria	c2.cp.reactome	REACTOME_OVARIAN_TUMOR_DOMAIN_PROTEASES	http://www.gsea-msigdb.org/gsea/msigdb/cards/REACTOME_OVARIAN_TUMOR_DOMAIN_PROTEASES	27	2.15349421196528	0.183428097561974	1
iPSC-CVPC	Heart	c2.cp.reactome	REACTOME_CD22_MEDIATED_BCR_REGULATION	http://www.gsea-msigdb.org/gsea/msigdb/cards/REACTOME_CD22_MEDIATED_BCR_REGULATION	4	0	1	1
iPSC-CVPC	Arteria	c2.cp.reactome	REACTOME_CD22_MEDIATED_BCR_REGULATION	http://www.gsea-msigdb.org/gsea/msigdb/cards/REACTOME_CD22_MEDIATED_BCR_REGULATION	4	0	1	1
iPSC-CVPC	Heart	c2.cp.reactome	REACTOME_RESOLUTION_OF_D_LOOP_STRUCTURES	http://www.gsea-msigdb.org/gsea/msigdb/cards/REACTOME_RESOLUTION_OF_D_LOOP_STRUCTURES	26	1.15627400163101	0.587535071050246	1
iPSC-CVPC	Arteria	c2.cp.reactome	REACTOME_RESOLUTION_OF_D_LOOP_STRUCTURES	http://www.gsea-msigdb.org/gsea/msigdb/cards/REACTOME_RESOLUTION_OF_D_LOOP_STRUCTURES	26	1.43325964912756	0.652109004375886	1
Heart	Arteria	c2.cp.reactome	REACTOME_RESOLUTION_OF_D_LOOP_STRUCTURES	http://www.gsea-msigdb.org/gsea/msigdb/cards/REACTOME_RESOLUTION_OF_D_LOOP_STRUCTURES	26	0	1	1
iPSC-CVPC	Heart	c2.cp.reactome	REACTOME_SENSING_OF_DNA_DOUBLE_STRAND_BREAKS	http://www.gsea-msigdb.org/gsea/msigdb/cards/REACTOME_SENSING_OF_DNA_DOUBLE_STRAND_BREAKS	5	0	1	1
iPSC-CVPC	Arteria	c2.cp.reactome	REACTOME_SENSING_OF_DNA_DOUBLE_STRAND_BREAKS	http://www.gsea-msigdb.org/gsea/msigdb/cards/REACTOME_SENSING_OF_DNA_DOUBLE_STRAND_BREAKS	5	4.30013123953848	0.246404002422746	1
Heart	Arteria	c2.cp.reactome	REACTOME_SENSING_OF_DNA_DOUBLE_STRAND_BREAKS	http://www.gsea-msigdb.org/gsea/msigdb/cards/REACTOME_SENSING_OF_DNA_DOUBLE_STRAND_BREAKS	5	0	1	1
iPSC-CVPC	Heart	c2.cp.reactome	REACTOME_NONHOMOLOGOUS_END_JOINING_NHEJ	http://www.gsea-msigdb.org/gsea/msigdb/cards/REACTOME_NONHOMOLOGOUS_END_JOINING_NHEJ	38	0.780382261006442	1	1
iPSC-CVPC	Arteria	c2.cp.reactome	REACTOME_NONHOMOLOGOUS_END_JOINING_NHEJ	http://www.gsea-msigdb.org/gsea/msigdb/cards/REACTOME_NONHOMOLOGOUS_END_JOINING_NHEJ	38	0.954419685033707	1	1
Heart	Arteria	c2.cp.reactome	REACTOME_NONHOMOLOGOUS_END_JOINING_NHEJ	http://www.gsea-msigdb.org/gsea/msigdb/cards/REACTOME_NONHOMOLOGOUS_END_JOINING_NHEJ	38	2.7362023852412	0.313636264329464	1
iPSC-CVPC	Heart	c2.cp.reactome	REACTOME_PROCESSING_OF_DNA_DOUBLE_STRAND_BREAK_ENDS	http://www.gsea-msigdb.org/gsea/msigdb/cards/REACTOME_PROCESSING_OF_DNA_DOUBLE_STRAND_BREAK_ENDS	57	0	0.265749468204868	1
iPSC-CVPC	Arteria	c2.cp.reactome	REACTOME_PROCESSING_OF_DNA_DOUBLE_STRAND_BREAK_ENDS	http://www.gsea-msigdb.org/gsea/msigdb/cards/REACTOME_PROCESSING_OF_DNA_DOUBLE_STRAND_BREAK_ENDS	57	0.623538322064007	0.769967234449578	1
Heart	Arteria	c2.cp.reactome	REACTOME_PROCESSING_OF_DNA_DOUBLE_STRAND_BREAK_ENDS	http://www.gsea-msigdb.org/gsea/msigdb/cards/REACTOME_PROCESSING_OF_DNA_DOUBLE_STRAND_BREAK_ENDS	57	3.71081295046607	0.108069734262341	1
iPSC-CVPC	Heart	c2.cp.reactome	REACTOME_CARGO_CONCENTRATION_IN_THE_ER	http://www.gsea-msigdb.org/gsea/msigdb/cards/REACTOME_CARGO_CONCENTRATION_IN_THE_ER	24	0	1	1
iPSC-CVPC	Arteria	c2.cp.reactome	REACTOME_CARGO_CONCENTRATION_IN_THE_ER	http://www.gsea-msigdb.org/gsea/msigdb/cards/REACTOME_CARGO_CONCENTRATION_IN_THE_ER	24	0	0.640378071435149	1
iPSC-CVPC	Heart	c2.cp.reactome	REACTOME_DNA_DAMAGE_RECOGNITION_IN_GG_NER	http://www.gsea-msigdb.org/gsea/msigdb/cards/REACTOME_DNA_DAMAGE_RECOGNITION_IN_GG_NER	31	0.963111892015353	1	1
iPSC-CVPC	Heart	c2.cp.reactome	REACTOME_GAP_FILLING_DNA_REPAIR_SYNTHESIS_AND_LIGATION_IN_GG_NER	http://www.gsea-msigdb.org/gsea/msigdb/cards/REACTOME_GAP_FILLING_DNA_REPAIR_SYNTHESIS_AND_LIGATION_IN_GG_NER	21	0	1	1
iPSC-CVPC	Arteria	c2.cp.reactome	REACTOME_GAP_FILLING_DNA_REPAIR_SYNTHESIS_AND_LIGATION_IN_GG_NER	http://www.gsea-msigdb.org/gsea/msigdb/cards/REACTOME_GAP_FILLING_DNA_REPAIR_SYNTHESIS_AND_LIGATION_IN_GG_NER	21	0.858882501292722	1	1
iPSC-CVPC	Heart	c2.cp.reactome	REACTOME_DUAL_INCISION_IN_GG_NER	http://www.gsea-msigdb.org/gsea/msigdb/cards/REACTOME_DUAL_INCISION_IN_GG_NER	34	0	0.629421988680078	1
iPSC-CVPC	Arteria	c2.cp.reactome	REACTOME_DUAL_INCISION_IN_GG_NER	http://www.gsea-msigdb.org/gsea/msigdb/cards/REACTOME_DUAL_INCISION_IN_GG_NER	34	1.07410632471942	0.710803280946435	1
iPSC-CVPC	Heart	c2.cp.reactome	REACTOME_HIGHLY_SODIUM_PERMEABLE_POSTSYNAPTIC_ACETYLCHOLINE_NICOTINIC_RECEPTORS	http://www.gsea-msigdb.org/gsea/msigdb/cards/REACTOME_HIGHLY_SODIUM_PERMEABLE_POSTSYNAPTIC_ACETYLCHOLINE_NICOTINIC_RECEPTORS	1	0	1	1
iPSC-CVPC	Arteria	c2.cp.reactome	REACTOME_HIGHLY_SODIUM_PERMEABLE_POSTSYNAPTIC_ACETYLCHOLINE_NICOTINIC_RECEPTORS	http://www.gsea-msigdb.org/gsea/msigdb/cards/REACTOME_HIGHLY_SODIUM_PERMEABLE_POSTSYNAPTIC_ACETYLCHOLINE_NICOTINIC_RECEPTORS	1	0	1	1
iPSC-CVPC	Heart	c2.cp.reactome	REACTOME_FORMATION_OF_TC_NER_PRE_INCISION_COMPLEX	http://www.gsea-msigdb.org/gsea/msigdb/cards/REACTOME_FORMATION_OF_TC_NER_PRE_INCISION_COMPLEX	38	0.780382261006442	1	1
iPSC-CVPC	Arteria	c2.cp.reactome	REACTOME_FORMATION_OF_TC_NER_PRE_INCISION_COMPLEX	http://www.gsea-msigdb.org/gsea/msigdb/cards/REACTOME_FORMATION_OF_TC_NER_PRE_INCISION_COMPLEX	38	1.47511270934795	0.46438044677869	1
iPSC-CVPC	Heart	c2.cp.reactome	REACTOME_TRANSCRIPTION_COUPLED_NUCLEOTIDE_EXCISION_REPAIR_TC_NER	http://www.gsea-msigdb.org/gsea/msigdb/cards/REACTOME_TRANSCRIPTION_COUPLED_NUCLEOTIDE_EXCISION_REPAIR_TC_NER	58	0.505589194361402	1	1
iPSC-CVPC	Arteria	c2.cp.reactome	REACTOME_TRANSCRIPTION_COUPLED_NUCLEOTIDE_EXCISION_REPAIR_TC_NER	http://www.gsea-msigdb.org/gsea/msigdb/cards/REACTOME_TRANSCRIPTION_COUPLED_NUCLEOTIDE_EXCISION_REPAIR_TC_NER	58	0.93689775855181	1	1
iPSC-CVPC	Heart	c2.cp.reactome	REACTOME_DUAL_INCISION_IN_TC_NER	http://www.gsea-msigdb.org/gsea/msigdb/cards/REACTOME_DUAL_INCISION_IN_TC_NER	49	0	0.412965550676407	1
iPSC-CVPC	Arteria	c2.cp.reactome	REACTOME_DUAL_INCISION_IN_TC_NER	http://www.gsea-msigdb.org/gsea/msigdb/cards/REACTOME_DUAL_INCISION_IN_TC_NER	49	1.1211898064074	0.750539406185429	1
iPSC-CVPC	Heart	c2.cp.reactome	REACTOME_INTERLEUKIN_6_FAMILY_SIGNALING	http://www.gsea-msigdb.org/gsea/msigdb/cards/REACTOME_INTERLEUKIN_6_FAMILY_SIGNALING	16	0	1	1
iPSC-CVPC	Heart	c2.cp.reactome	REACTOME_INTERLEUKIN_10_SIGNALING	http://www.gsea-msigdb.org/gsea/msigdb/cards/REACTOME_INTERLEUKIN_10_SIGNALING	24	0	1	1
iPSC-CVPC	Arteria	c2.cp.reactome	REACTOME_INTERLEUKIN_10_SIGNALING	http://www.gsea-msigdb.org/gsea/msigdb/cards/REACTOME_INTERLEUKIN_10_SIGNALING	24	0	0.640378071435149	1
iPSC-CVPC	Heart	c2.cp.reactome	REACTOME_TRNA_PROCESSING_IN_THE_NUCLEUS	http://www.gsea-msigdb.org/gsea/msigdb/cards/REACTOME_TRNA_PROCESSING_IN_THE_NUCLEUS	40	0.740220986443109	1	1
iPSC-CVPC	Heart	c2.cp.reactome	REACTOME_INTERLEUKIN_4_AND_INTERLEUKIN_13_SIGNALING	http://www.gsea-msigdb.org/gsea/msigdb/cards/REACTOME_INTERLEUKIN_4_AND_INTERLEUKIN_13_SIGNALING	57	0.51466736785341	1	1
iPSC-CVPC	Arteria	c2.cp.reactome	REACTOME_INTERLEUKIN_4_AND_INTERLEUKIN_13_SIGNALING	http://www.gsea-msigdb.org/gsea/msigdb/cards/REACTOME_INTERLEUKIN_4_AND_INTERLEUKIN_13_SIGNALING	57	0.623538322064007	0.769967234449578	1
iPSC-CVPC	Heart	c2.cp.reactome	REACTOME_TRNA_MODIFICATION_IN_THE_MITOCHONDRION	http://www.gsea-msigdb.org/gsea/msigdb/cards/REACTOME_TRNA_MODIFICATION_IN_THE_MITOCHONDRION	7	0	1	1
iPSC-CVPC	Arteria	c2.cp.reactome	REACTOME_TRNA_MODIFICATION_IN_THE_MITOCHONDRION	http://www.gsea-msigdb.org/gsea/msigdb/cards/REACTOME_TRNA_MODIFICATION_IN_THE_MITOCHONDRION	7	2.86643075245736	0.32705832013432	1
iPSC-CVPC	Heart	c2.cp.reactome	REACTOME_GDP_FUCOSE_BIOSYNTHESIS	http://www.gsea-msigdb.org/gsea/msigdb/cards/REACTOME_GDP_FUCOSE_BIOSYNTHESIS	6	0	1	1
iPSC-CVPC	Arteria	c2.cp.reactome	REACTOME_GDP_FUCOSE_BIOSYNTHESIS	http://www.gsea-msigdb.org/gsea/msigdb/cards/REACTOME_GDP_FUCOSE_BIOSYNTHESIS	6	0	1	1
iPSC-CVPC	Heart	c2.cp.reactome	REACTOME_RRNA_MODIFICATION_IN_THE_MITOCHONDRION	http://www.gsea-msigdb.org/gsea/msigdb/cards/REACTOME_RRNA_MODIFICATION_IN_THE_MITOCHONDRION	5	0	1	1
iPSC-CVPC	Arteria	c2.cp.reactome	REACTOME_RRNA_MODIFICATION_IN_THE_MITOCHONDRION	http://www.gsea-msigdb.org/gsea/msigdb/cards/REACTOME_RRNA_MODIFICATION_IN_THE_MITOCHONDRION	5	4.30013123953848	0.246404002422746	1
Heart	Arteria	c2.cp.reactome	REACTOME_RRNA_MODIFICATION_IN_THE_MITOCHONDRION	http://www.gsea-msigdb.org/gsea/msigdb/cards/REACTOME_RRNA_MODIFICATION_IN_THE_MITOCHONDRION	5	0	1	1
iPSC-CVPC	Heart	c2.cp.reactome	REACTOME_NEUREXINS_AND_NEUROLIGINS	http://www.gsea-msigdb.org/gsea/msigdb/cards/REACTOME_NEUREXINS_AND_NEUROLIGINS	33	0	0.627870388797415	1
iPSC-CVPC	Arteria	c2.cp.reactome	REACTOME_NEUREXINS_AND_NEUROLIGINS	http://www.gsea-msigdb.org/gsea/msigdb/cards/REACTOME_NEUREXINS_AND_NEUROLIGINS	33	0	0.259448293457314	1
iPSC-CVPC	Arteria	c2.cp.reactome	REACTOME_PROTEIN_PROTEIN_INTERACTIONS_AT_SYNAPSES	http://www.gsea-msigdb.org/gsea/msigdb/cards/REACTOME_PROTEIN_PROTEIN_INTERACTIONS_AT_SYNAPSES	53	0	0.118975131538089	1
iPSC-CVPC	Heart	c2.cp.reactome	REACTOME_CHOLINE_CATABOLISM	http://www.gsea-msigdb.org/gsea/msigdb/cards/REACTOME_CHOLINE_CATABOLISM	2	0	1	1
iPSC-CVPC	Arteria	c2.cp.reactome	REACTOME_CHOLINE_CATABOLISM	http://www.gsea-msigdb.org/gsea/msigdb/cards/REACTOME_CHOLINE_CATABOLISM	2	0	1	1
Heart	Arteria	c2.cp.reactome	REACTOME_CHOLINE_CATABOLISM	http://www.gsea-msigdb.org/gsea/msigdb/cards/REACTOME_CHOLINE_CATABOLISM	2	0	1	1
iPSC-CVPC	Heart	c2.cp.reactome	REACTOME_SIGNALING_BY_MODERATE_KINASE_ACTIVITY_BRAF_MUTANTS	http://www.gsea-msigdb.org/gsea/msigdb/cards/REACTOME_SIGNALING_BY_MODERATE_KINASE_ACTIVITY_BRAF_MUTANTS	34	2.81117936720139	0.103811668158466	1
iPSC-CVPC	Arteria	c2.cp.reactome	REACTOME_SIGNALING_BY_MODERATE_KINASE_ACTIVITY_BRAF_MUTANTS	http://www.gsea-msigdb.org/gsea/msigdb/cards/REACTOME_SIGNALING_BY_MODERATE_KINASE_ACTIVITY_BRAF_MUTANTS	34	0.519868770721711	1	1
iPSC-CVPC	Heart	c2.cp.reactome	REACTOME_ONCOGENIC_MAPK_SIGNALING	http://www.gsea-msigdb.org/gsea/msigdb/cards/REACTOME_ONCOGENIC_MAPK_SIGNALING	56	2.85852700771058	0.0386632502365709	1
iPSC-CVPC	Arteria	c2.cp.reactome	REACTOME_ONCOGENIC_MAPK_SIGNALING	http://www.gsea-msigdb.org/gsea/msigdb/cards/REACTOME_ONCOGENIC_MAPK_SIGNALING	56	1.69030574297735	0.235035703077519	1
iPSC-CVPC	Heart	c2.cp.reactome	REACTOME_TP53_REGULATES_TRANSCRIPTION_OF_CASPASE_ACTIVATORS_AND_CASPASES	http://www.gsea-msigdb.org/gsea/msigdb/cards/REACTOME_TP53_REGULATES_TRANSCRIPTION_OF_CASPASE_ACTIVATORS_AND_CASPASES	8	0	1	1
iPSC-CVPC	Arteria	c2.cp.reactome	REACTOME_TP53_REGULATES_TRANSCRIPTION_OF_CASPASE_ACTIVATORS_AND_CASPASES	http://www.gsea-msigdb.org/gsea/msigdb/cards/REACTOME_TP53_REGULATES_TRANSCRIPTION_OF_CASPASE_ACTIVATORS_AND_CASPASES	8	0	1	1
iPSC-CVPC	Heart	c2.cp.reactome	REACTOME_FGFR2_ALTERNATIVE_SPLICING	http://www.gsea-msigdb.org/gsea/msigdb/cards/REACTOME_FGFR2_ALTERNATIVE_SPLICING	15	2.06680724487839	0.399898977839414	1
iPSC-CVPC	Arteria	c2.cp.reactome	REACTOME_FGFR2_ALTERNATIVE_SPLICING	http://www.gsea-msigdb.org/gsea/msigdb/cards/REACTOME_FGFR2_ALTERNATIVE_SPLICING	15	1.22766633681219	0.572202813746029	1
iPSC-CVPC	Heart	c2.cp.reactome	REACTOME_TP53_REGULATES_TRANSCRIPTION_OF_GENES_INVOLVED_IN_G2_CELL_CYCLE_ARREST	http://www.gsea-msigdb.org/gsea/msigdb/cards/REACTOME_TP53_REGULATES_TRANSCRIPTION_OF_GENES_INVOLVED_IN_G2_CELL_CYCLE_ARREST	13	0	1	1
iPSC-CVPC	Arteria	c2.cp.reactome	REACTOME_TP53_REGULATES_TRANSCRIPTION_OF_GENES_INVOLVED_IN_G2_CELL_CYCLE_ARREST	http://www.gsea-msigdb.org/gsea/msigdb/cards/REACTOME_TP53_REGULATES_TRANSCRIPTION_OF_GENES_INVOLVED_IN_G2_CELL_CYCLE_ARREST	13	3.13073728899637	0.157963292950505	1
Heart	Arteria	c2.cp.reactome	REACTOME_TP53_REGULATES_TRANSCRIPTION_OF_GENES_INVOLVED_IN_G2_CELL_CYCLE_ARREST	http://www.gsea-msigdb.org/gsea/msigdb/cards/REACTOME_TP53_REGULATES_TRANSCRIPTION_OF_GENES_INVOLVED_IN_G2_CELL_CYCLE_ARREST	13	0	1	1
iPSC-CVPC	Heart	c2.cp.reactome	REACTOME_REGULATION_OF_TP53_ACTIVITY_THROUGH_ACETYLATION	http://www.gsea-msigdb.org/gsea/msigdb/cards/REACTOME_REGULATION_OF_TP53_ACTIVITY_THROUGH_ACETYLATION	22	0	1	1
iPSC-CVPC	Arteria	c2.cp.reactome	REACTOME_REGULATION_OF_TP53_ACTIVITY_THROUGH_ACETYLATION	http://www.gsea-msigdb.org/gsea/msigdb/cards/REACTOME_REGULATION_OF_TP53_ACTIVITY_THROUGH_ACETYLATION	22	0	0.630841230277534	1
iPSC-CVPC	Heart	c2.cp.reactome	REACTOME_METABOLISM_OF_FAT_SOLUBLE_VITAMINS	http://www.gsea-msigdb.org/gsea/msigdb/cards/REACTOME_METABOLISM_OF_FAT_SOLUBLE_VITAMINS	25	0	1	1
iPSC-CVPC	Arteria	c2.cp.reactome	REACTOME_METABOLISM_OF_FAT_SOLUBLE_VITAMINS	http://www.gsea-msigdb.org/gsea/msigdb/cards/REACTOME_METABOLISM_OF_FAT_SOLUBLE_VITAMINS	25	1.49571305274151	0.646007893234488	1
iPSC-CVPC	Heart	c2.cp.reactome	REACTOME_NEGATIVE_REGULATION_OF_MET_ACTIVITY	http://www.gsea-msigdb.org/gsea/msigdb/cards/REACTOME_NEGATIVE_REGULATION_OF_MET_ACTIVITY	18	1.70163520480477	0.458209802682747	1
iPSC-CVPC	Arteria	c2.cp.reactome	REACTOME_NEGATIVE_REGULATION_OF_MET_ACTIVITY	http://www.gsea-msigdb.org/gsea/msigdb/cards/REACTOME_NEGATIVE_REGULATION_OF_MET_ACTIVITY	18	4.93399501905673	0.0149480478736955	1
iPSC-CVPC	Heart	c2.cp.reactome	REACTOME_PTEN_REGULATION	http://www.gsea-msigdb.org/gsea/msigdb/cards/REACTOME_PTEN_REGULATION	96	1.25923613525276	0.564566998056024	1
iPSC-CVPC	Arteria	c2.cp.reactome	REACTOME_PTEN_REGULATION	http://www.gsea-msigdb.org/gsea/msigdb/cards/REACTOME_PTEN_REGULATION	96	1.35560226969869	0.371510126801411	1
iPSC-CVPC	Heart	c2.cp.reactome	REACTOME_RNA_POLYMERASE_II_TRANSCRIBES_SNRNA_GENES	http://www.gsea-msigdb.org/gsea/msigdb/cards/REACTOME_RNA_POLYMERASE_II_TRANSCRIBES_SNRNA_GENES	49	0	0.412965550676407	1
Heart	Arteria	c2.cp.reactome	REACTOME_RNA_POLYMERASE_II_TRANSCRIBES_SNRNA_GENES	http://www.gsea-msigdb.org/gsea/msigdb/cards/REACTOME_RNA_POLYMERASE_II_TRANSCRIBES_SNRNA_GENES	49	0	1	1
Heart	Arteria	c2.cp.reactome	REACTOME_RETROGRADE_TRANSPORT_AT_THE_TRANS_GOLGI_NETWORK	http://www.gsea-msigdb.org/gsea/msigdb/cards/REACTOME_RETROGRADE_TRANSPORT_AT_THE_TRANS_GOLGI_NETWORK	43	0	1	1
iPSC-CVPC	Heart	c2.cp.reactome	REACTOME_COOPERATION_OF_PDCL_PHLP1_AND_TRIC_CCT_IN_G_PROTEIN_BETA_FOLDING	http://www.gsea-msigdb.org/gsea/msigdb/cards/REACTOME_COOPERATION_OF_PDCL_PHLP1_AND_TRIC_CCT_IN_G_PROTEIN_BETA_FOLDING	19	0	1	1
iPSC-CVPC	Arteria	c2.cp.reactome	REACTOME_COOPERATION_OF_PDCL_PHLP1_AND_TRIC_CCT_IN_G_PROTEIN_BETA_FOLDING	http://www.gsea-msigdb.org/gsea/msigdb/cards/REACTOME_COOPERATION_OF_PDCL_PHLP1_AND_TRIC_CCT_IN_G_PROTEIN_BETA_FOLDING	19	0.954497488400478	1	1
iPSC-CVPC	Heart	c2.cp.reactome	REACTOME_GLYCEROPHOSPHOLIPID_CATABOLISM	http://www.gsea-msigdb.org/gsea/msigdb/cards/REACTOME_GLYCEROPHOSPHOLIPID_CATABOLISM	5	0	1	1
iPSC-CVPC	Arteria	c2.cp.reactome	REACTOME_GLYCEROPHOSPHOLIPID_CATABOLISM	http://www.gsea-msigdb.org/gsea/msigdb/cards/REACTOME_GLYCEROPHOSPHOLIPID_CATABOLISM	5	0	1	1
iPSC-CVPC	Arteria	c2.cp.reactome	REACTOME_ASSEMBLY_OF_THE_ORC_COMPLEX_AT_THE_ORIGIN_OF_REPLICATION	http://www.gsea-msigdb.org/gsea/msigdb/cards/REACTOME_ASSEMBLY_OF_THE_ORC_COMPLEX_AT_THE_ORIGIN_OF_REPLICATION	3	8.60080469666007	0.156101417358333	1
iPSC-CVPC	Heart	c2.cp.reactome	REACTOME_MITOTIC_TELOPHASE_CYTOKINESIS	http://www.gsea-msigdb.org/gsea/msigdb/cards/REACTOME_MITOTIC_TELOPHASE_CYTOKINESIS	8	9.6746905902826	0.0273345970032182	1
iPSC-CVPC	Arteria	c2.cp.reactome	REACTOME_MITOTIC_TELOPHASE_CYTOKINESIS	http://www.gsea-msigdb.org/gsea/msigdb/cards/REACTOME_MITOTIC_TELOPHASE_CYTOKINESIS	8	5.74157083776417	0.0678123645213366	1
iPSC-CVPC	Arteria	c2.cp.reactome	REACTOME_M_PHASE	http://www.gsea-msigdb.org/gsea/msigdb/cards/REACTOME_M_PHASE	248	2.2461699006364	0.0003140607304936	0.167943975631453
iPSC-CVPC	Heart	c2.cp.reactome	REACTOME_DNA_REPLICATION_PRE_INITIATION	http://www.gsea-msigdb.org/gsea/msigdb/cards/REACTOME_DNA_REPLICATION_PRE_INITIATION	50	1.20513954485096	0.683986665406094	1
iPSC-CVPC	Arteria	c2.cp.reactome	REACTOME_DNA_REPLICATION_PRE_INITIATION	http://www.gsea-msigdb.org/gsea/msigdb/cards/REACTOME_DNA_REPLICATION_PRE_INITIATION	50	1.91683982510707	0.197365165557769	1
iPSC-CVPC	Heart	c2.cp.reactome	REACTOME_G1_S_DNA_DAMAGE_CHECKPOINTS	http://www.gsea-msigdb.org/gsea/msigdb/cards/REACTOME_G1_S_DNA_DAMAGE_CHECKPOINTS	45	1.34590988905623	0.662755590345398	1
iPSC-CVPC	Arteria	c2.cp.reactome	REACTOME_G1_S_DNA_DAMAGE_CHECKPOINTS	http://www.gsea-msigdb.org/gsea/msigdb/cards/REACTOME_G1_S_DNA_DAMAGE_CHECKPOINTS	45	1.68084892441784	0.311545975326964	1
iPSC-CVPC	Heart	c2.cp.reactome	REACTOME_MITOTIC_SPINDLE_CHECKPOINT	http://www.gsea-msigdb.org/gsea/msigdb/cards/REACTOME_MITOTIC_SPINDLE_CHECKPOINT	71	2.20579210861674	0.0886388914320784	1
iPSC-CVPC	Arteria	c2.cp.reactome	REACTOME_MITOTIC_SPINDLE_CHECKPOINT	http://www.gsea-msigdb.org/gsea/msigdb/cards/REACTOME_MITOTIC_SPINDLE_CHECKPOINT	71	1.8898402756555	0.112158727851391	1
iPSC-CVPC	Heart	c2.cp.reactome	REACTOME_CYCLIN_A_CDK2_ASSOCIATED_EVENTS_AT_S_PHASE_ENTRY	http://www.gsea-msigdb.org/gsea/msigdb/cards/REACTOME_CYCLIN_A_CDK2_ASSOCIATED_EVENTS_AT_S_PHASE_ENTRY	58	1.58094276909136	0.444984319857277	1
iPSC-CVPC	Arteria	c2.cp.reactome	REACTOME_CYCLIN_A_CDK2_ASSOCIATED_EVENTS_AT_S_PHASE_ENTRY	http://www.gsea-msigdb.org/gsea/msigdb/cards/REACTOME_CYCLIN_A_CDK2_ASSOCIATED_EVENTS_AT_S_PHASE_ENTRY	58	3.1889024383211	0.00411289443379389	0.673680992324537
iPSC-CVPC	Heart	c2.cp.reactome	REACTOME_FRUCTOSE_CATABOLISM	http://www.gsea-msigdb.org/gsea/msigdb/cards/REACTOME_FRUCTOSE_CATABOLISM	3	0	1	1
iPSC-CVPC	Heart	c2.cp.reactome	REACTOME_UREA_CYCLE	http://www.gsea-msigdb.org/gsea/msigdb/cards/REACTOME_UREA_CYCLE	5	0	1	1
iPSC-CVPC	Arteria	c2.cp.reactome	REACTOME_UREA_CYCLE	http://www.gsea-msigdb.org/gsea/msigdb/cards/REACTOME_UREA_CYCLE	5	0	1	1
Heart	Arteria	c2.cp.reactome	REACTOME_UREA_CYCLE	http://www.gsea-msigdb.org/gsea/msigdb/cards/REACTOME_UREA_CYCLE	5	0	1	1
iPSC-CVPC	Heart	c2.cp.reactome	REACTOME_HISTIDINE_CATABOLISM	http://www.gsea-msigdb.org/gsea/msigdb/cards/REACTOME_HISTIDINE_CATABOLISM	2	0	1	1
iPSC-CVPC	Arteria	c2.cp.reactome	REACTOME_HISTIDINE_CATABOLISM	http://www.gsea-msigdb.org/gsea/msigdb/cards/REACTOME_HISTIDINE_CATABOLISM	2	0	1	1
Heart	Arteria	c2.cp.reactome	REACTOME_HISTIDINE_CATABOLISM	http://www.gsea-msigdb.org/gsea/msigdb/cards/REACTOME_HISTIDINE_CATABOLISM	2	0	1	1
iPSC-CVPC	Heart	c2.cp.reactome	REACTOME_PROPIONYL_COA_CATABOLISM	http://www.gsea-msigdb.org/gsea/msigdb/cards/REACTOME_PROPIONYL_COA_CATABOLISM	4	0	1	1
iPSC-CVPC	Arteria	c2.cp.reactome	REACTOME_PROPIONYL_COA_CATABOLISM	http://www.gsea-msigdb.org/gsea/msigdb/cards/REACTOME_PROPIONYL_COA_CATABOLISM	4	5.73347995452449	0.202527703020063	1
iPSC-CVPC	Arteria	c2.cp.reactome	REACTOME_LYSINE_CATABOLISM	http://www.gsea-msigdb.org/gsea/msigdb/cards/REACTOME_LYSINE_CATABOLISM	6	3.43989946228232	0.28787014889611	1
iPSC-CVPC	Arteria	c2.cp.reactome	REACTOME_CREATINE_METABOLISM	http://www.gsea-msigdb.org/gsea/msigdb/cards/REACTOME_CREATINE_METABOLISM	4	0	1	1
Heart	Arteria	c2.cp.reactome	REACTOME_CREATINE_METABOLISM	http://www.gsea-msigdb.org/gsea/msigdb/cards/REACTOME_CREATINE_METABOLISM	4	0	1	1
iPSC-CVPC	Heart	c2.cp.reactome	REACTOME_PENTOSE_PHOSPHATE_PATHWAY	http://www.gsea-msigdb.org/gsea/msigdb/cards/REACTOME_PENTOSE_PHOSPHATE_PATHWAY	6	0	1	1
iPSC-CVPC	Arteria	c2.cp.reactome	REACTOME_PENTOSE_PHOSPHATE_PATHWAY	http://www.gsea-msigdb.org/gsea/msigdb/cards/REACTOME_PENTOSE_PHOSPHATE_PATHWAY	6	0	1	1
iPSC-CVPC	Heart	c2.cp.reactome	REACTOME_MRNA_EDITING_C_TO_U_CONVERSION	http://www.gsea-msigdb.org/gsea/msigdb/cards/REACTOME_MRNA_EDITING_C_TO_U_CONVERSION	1	0	1	1
iPSC-CVPC	Arteria	c2.cp.reactome	REACTOME_MRNA_EDITING_C_TO_U_CONVERSION	http://www.gsea-msigdb.org/gsea/msigdb/cards/REACTOME_MRNA_EDITING_C_TO_U_CONVERSION	1	0	1	1
iPSC-CVPC	Heart	c2.cp.reactome	REACTOME_TRNA_PROCESSING	http://www.gsea-msigdb.org/gsea/msigdb/cards/REACTOME_TRNA_PROCESSING	80	0.73948878531637	1	1
iPSC-CVPC	Arteria	c2.cp.reactome	REACTOME_TRNA_PROCESSING	http://www.gsea-msigdb.org/gsea/msigdb/cards/REACTOME_TRNA_PROCESSING	80	1.3971539325314	0.45279446556102	1
Heart	Arteria	c2.cp.reactome	REACTOME_RNA_POLYMERASE_I_PROMOTER_ESCAPE	http://www.gsea-msigdb.org/gsea/msigdb/cards/REACTOME_RNA_POLYMERASE_I_PROMOTER_ESCAPE	29	0	1	1
iPSC-CVPC	Heart	c2.cp.reactome	REACTOME_RNA_POLYMERASE_I_TRANSCRIPTION_TERMINATION	http://www.gsea-msigdb.org/gsea/msigdb/cards/REACTOME_RNA_POLYMERASE_I_TRANSCRIPTION_TERMINATION	20	1.52222000786147	0.493909020284852	1
iPSC-CVPC	Arteria	c2.cp.reactome	REACTOME_RNA_POLYMERASE_I_TRANSCRIPTION_TERMINATION	http://www.gsea-msigdb.org/gsea/msigdb/cards/REACTOME_RNA_POLYMERASE_I_TRANSCRIPTION_TERMINATION	20	3.04207005490199	0.0941377647123002	1
iPSC-CVPC	Heart	c2.cp.reactome	REACTOME_RNA_POLYMERASE_I_TRANSCRIPTION	http://www.gsea-msigdb.org/gsea/msigdb/cards/REACTOME_RNA_POLYMERASE_I_TRANSCRIPTION	44	1.37806967382688	0.658822768357992	1
iPSC-CVPC	Arteria	c2.cp.reactome	REACTOME_RNA_POLYMERASE_I_TRANSCRIPTION	http://www.gsea-msigdb.org/gsea/msigdb/cards/REACTOME_RNA_POLYMERASE_I_TRANSCRIPTION	44	1.72303857251004	0.304174149275118	1
Heart	Arteria	c2.cp.reactome	REACTOME_RNA_POLYMERASE_I_TRANSCRIPTION	http://www.gsea-msigdb.org/gsea/msigdb/cards/REACTOME_RNA_POLYMERASE_I_TRANSCRIPTION	44	2.35317084278652	0.353313967550082	1
iPSC-CVPC	Heart	c2.cp.reactome	REACTOME_DEATH_RECEPTOR_SIGNALLING	http://www.gsea-msigdb.org/gsea/msigdb/cards/REACTOME_DEATH_RECEPTOR_SIGNALLING	115	2.18685615218433	0.0584111123869008	1
iPSC-CVPC	Arteria	c2.cp.reactome	REACTOME_DEATH_RECEPTOR_SIGNALLING	http://www.gsea-msigdb.org/gsea/msigdb/cards/REACTOME_DEATH_RECEPTOR_SIGNALLING	115	1.28855390741457	0.414567780281101	1
Heart	Arteria	c2.cp.reactome	REACTOME_DEATH_RECEPTOR_SIGNALLING	http://www.gsea-msigdb.org/gsea/msigdb/cards/REACTOME_DEATH_RECEPTOR_SIGNALLING	115	0.881757361333956	1	1
iPSC-CVPC	Heart	c2.cp.reactome	REACTOME_BASE_EXCISION_REPAIR_AP_SITE_FORMATION	http://www.gsea-msigdb.org/gsea/msigdb/cards/REACTOME_BASE_EXCISION_REPAIR_AP_SITE_FORMATION	23	1.3143110612457	0.543107345372945	1
Heart	Arteria	c2.cp.reactome	REACTOME_BASE_EXCISION_REPAIR_AP_SITE_FORMATION	http://www.gsea-msigdb.org/gsea/msigdb/cards/REACTOME_BASE_EXCISION_REPAIR_AP_SITE_FORMATION	23	0	1	1
iPSC-CVPC	Heart	c2.cp.reactome	REACTOME_DNA_DAMAGE_REVERSAL	http://www.gsea-msigdb.org/gsea/msigdb/cards/REACTOME_DNA_DAMAGE_REVERSAL	7	4.82583104349693	0.211967399288745	1
iPSC-CVPC	Heart	c2.cp.reactome	REACTOME_RNA_POLYMERASE_III_TRANSCRIPTION_TERMINATION	http://www.gsea-msigdb.org/gsea/msigdb/cards/REACTOME_RNA_POLYMERASE_III_TRANSCRIPTION_TERMINATION	12	5.80331022040599	0.059015630428056	1
iPSC-CVPC	Arteria	c2.cp.reactome	REACTOME_RNA_POLYMERASE_III_TRANSCRIPTION_TERMINATION	http://www.gsea-msigdb.org/gsea/msigdb/cards/REACTOME_RNA_POLYMERASE_III_TRANSCRIPTION_TERMINATION	12	1.56288361152648	0.492970723871524	1
iPSC-CVPC	Heart	c2.cp.reactome	REACTOME_KETONE_BODY_METABOLISM	http://www.gsea-msigdb.org/gsea/msigdb/cards/REACTOME_KETONE_BODY_METABOLISM	8	0	1	1
iPSC-CVPC	Heart	c2.cp.reactome	REACTOME_CHK1_CHK2_CDS1_MEDIATED_INACTIVATION_OF_CYCLIN_B_CDK1_COMPLEX	http://www.gsea-msigdb.org/gsea/msigdb/cards/REACTOME_CHK1_CHK2_CDS1_MEDIATED_INACTIVATION_OF_CYCLIN_B_CDK1_COMPLEX	6	0	1	1
Heart	Arteria	c2.cp.reactome	REACTOME_MRNA_EDITING	http://www.gsea-msigdb.org/gsea/msigdb/cards/REACTOME_MRNA_EDITING	3	0	1	1
iPSC-CVPC	Heart	c2.cp.reactome	REACTOME_FASL_CD95L_SIGNALING	http://www.gsea-msigdb.org/gsea/msigdb/cards/REACTOME_FASL_CD95L_SIGNALING	3	0	1	1
iPSC-CVPC	Heart	c2.cp.reactome	REACTOME_MITOCHONDRIAL_FATTY_ACID_BETA_OXIDATION_OF_UNSATURATED_FATTY_ACIDS	http://www.gsea-msigdb.org/gsea/msigdb/cards/REACTOME_MITOCHONDRIAL_FATTY_ACID_BETA_OXIDATION_OF_UNSATURATED_FATTY_ACIDS	3	0	1	1
iPSC-CVPC	Arteria	c2.cp.reactome	REACTOME_MITOCHONDRIAL_FATTY_ACID_BETA_OXIDATION_OF_UNSATURATED_FATTY_ACIDS	http://www.gsea-msigdb.org/gsea/msigdb/cards/REACTOME_MITOCHONDRIAL_FATTY_ACID_BETA_OXIDATION_OF_UNSATURATED_FATTY_ACIDS	3	0	1	1
iPSC-CVPC	Arteria	c2.cp.reactome	REACTOME_BETA_OXIDATION_OF_HEXANOYL_COA_TO_BUTANOYL_COA	http://www.gsea-msigdb.org/gsea/msigdb/cards/REACTOME_BETA_OXIDATION_OF_HEXANOYL_COA_TO_BUTANOYL_COA	3	0	1	1
iPSC-CVPC	Arteria	c2.cp.reactome	REACTOME_TRANSPORT_OF_FATTY_ACIDS	http://www.gsea-msigdb.org/gsea/msigdb/cards/REACTOME_TRANSPORT_OF_FATTY_ACIDS	4	0	1	1
iPSC-CVPC	Arteria	c2.cp.reactome	REACTOME_TRANSPORT_OF_NUCLEOSIDES_AND_FREE_PURINE_AND_PYRIMIDINE_BASES_ACROSS_THE_PLASMA_MEMBRANE	http://www.gsea-msigdb.org/gsea/msigdb/cards/REACTOME_TRANSPORT_OF_NUCLEOSIDES_AND_FREE_PURINE_AND_PYRIMIDINE_BASES_ACROSS_THE_PLASMA_MEMBRANE	5	4.30013123953848	0.246404002422746	1
iPSC-CVPC	Heart	c2.cp.reactome	REACTOME_WAX_AND_PLASMALOGEN_BIOSYNTHESIS	http://www.gsea-msigdb.org/gsea/msigdb/cards/REACTOME_WAX_AND_PLASMALOGEN_BIOSYNTHESIS	5	19.3479747114386	0.0104338960654953	0.977898532464758
Heart	Arteria	c2.cp.reactome	REACTOME_WAX_AND_PLASMALOGEN_BIOSYNTHESIS	http://www.gsea-msigdb.org/gsea/msigdb/cards/REACTOME_WAX_AND_PLASMALOGEN_BIOSYNTHESIS	5	0	1	1
iPSC-CVPC	Heart	c2.cp.reactome	REACTOME_PTK6_REGULATES_CELL_CYCLE	http://www.gsea-msigdb.org/gsea/msigdb/cards/REACTOME_PTK6_REGULATES_CELL_CYCLE	3	0	1	1
Heart	Arteria	c2.cp.reactome	REACTOME_PTK6_REGULATES_CELL_CYCLE	http://www.gsea-msigdb.org/gsea/msigdb/cards/REACTOME_PTK6_REGULATES_CELL_CYCLE	3	0	1	1
iPSC-CVPC	Heart	c2.cp.reactome	REACTOME_PTK6_REGULATES_RHO_GTPASES_RAS_GTPASE_AND_MAP_KINASES	http://www.gsea-msigdb.org/gsea/msigdb/cards/REACTOME_PTK6_REGULATES_RHO_GTPASES_RAS_GTPASE_AND_MAP_KINASES	11	2.89443661038946	0.312305480267594	1
Heart	Arteria	c2.cp.reactome	REACTOME_PTK6_REGULATES_RHO_GTPASES_RAS_GTPASE_AND_MAP_KINASES	http://www.gsea-msigdb.org/gsea/msigdb/cards/REACTOME_PTK6_REGULATES_RHO_GTPASES_RAS_GTPASE_AND_MAP_KINASES	11	0	1	1
iPSC-CVPC	Heart	c2.cp.reactome	REACTOME_PTK6_EXPRESSION	http://www.gsea-msigdb.org/gsea/msigdb/cards/REACTOME_PTK6_EXPRESSION	4	0	1	1
Heart	Arteria	c2.cp.reactome	REACTOME_PTK6_EXPRESSION	http://www.gsea-msigdb.org/gsea/msigdb/cards/REACTOME_PTK6_EXPRESSION	4	0	1	1
iPSC-CVPC	Arteria	c2.cp.reactome	REACTOME_RET_SIGNALING	http://www.gsea-msigdb.org/gsea/msigdb/cards/REACTOME_RET_SIGNALING	25	1.49571305274151	0.646007893234488	1
iPSC-CVPC	Arteria	c2.cp.reactome	REACTOME_AURKA_ACTIVATION_BY_TPX2	http://www.gsea-msigdb.org/gsea/msigdb/cards/REACTOME_AURKA_ACTIVATION_BY_TPX2	49	3.91010125752991	0.00123111852624919	0.352497346220468
iPSC-CVPC	Heart	c2.cp.reactome	REACTOME_CLATHRIN_MEDIATED_ENDOCYTOSIS	http://www.gsea-msigdb.org/gsea/msigdb/cards/REACTOME_CLATHRIN_MEDIATED_ENDOCYTOSIS	91	0.984978261589792	1	1
iPSC-CVPC	Arteria	c2.cp.reactome	REACTOME_CLATHRIN_MEDIATED_ENDOCYTOSIS	http://www.gsea-msigdb.org/gsea/msigdb/cards/REACTOME_CLATHRIN_MEDIATED_ENDOCYTOSIS	91	1.66508026712319	0.163050152969232	1
Heart	Arteria	c2.cp.reactome	REACTOME_CLATHRIN_MEDIATED_ENDOCYTOSIS	http://www.gsea-msigdb.org/gsea/msigdb/cards/REACTOME_CLATHRIN_MEDIATED_ENDOCYTOSIS	91	1.11943094781984	0.594857481848082	1
iPSC-CVPC	Heart	c2.cp.reactome	REACTOME_PTK6_PROMOTES_HIF1A_STABILIZATION	http://www.gsea-msigdb.org/gsea/msigdb/cards/REACTOME_PTK6_PROMOTES_HIF1A_STABILIZATION	5	0	1	1
iPSC-CVPC	Arteria	c2.cp.reactome	REACTOME_PTK6_PROMOTES_HIF1A_STABILIZATION	http://www.gsea-msigdb.org/gsea/msigdb/cards/REACTOME_PTK6_PROMOTES_HIF1A_STABILIZATION	5	4.30013123953848	0.246404002422746	1
Heart	Arteria	c2.cp.reactome	REACTOME_PTK6_PROMOTES_HIF1A_STABILIZATION	http://www.gsea-msigdb.org/gsea/msigdb/cards/REACTOME_PTK6_PROMOTES_HIF1A_STABILIZATION	5	0	1	1
iPSC-CVPC	Heart	c2.cp.reactome	REACTOME_VLDL_ASSEMBLY	http://www.gsea-msigdb.org/gsea/msigdb/cards/REACTOME_VLDL_ASSEMBLY	2	0	1	1
iPSC-CVPC	Arteria	c2.cp.reactome	REACTOME_VLDL_ASSEMBLY	http://www.gsea-msigdb.org/gsea/msigdb/cards/REACTOME_VLDL_ASSEMBLY	2	0	1	1
iPSC-CVPC	Heart	c2.cp.reactome	REACTOME_SYNTHESIS_OF_ACTIVE_UBIQUITIN_ROLES_OF_E1_AND_E2_ENZYMES	http://www.gsea-msigdb.org/gsea/msigdb/cards/REACTOME_SYNTHESIS_OF_ACTIVE_UBIQUITIN_ROLES_OF_E1_AND_E2_ENZYMES	23	1.3143110612457	0.543107345372945	1
iPSC-CVPC	Arteria	c2.cp.reactome	REACTOME_SYNTHESIS_OF_ACTIVE_UBIQUITIN_ROLES_OF_E1_AND_E2_ENZYMES	http://www.gsea-msigdb.org/gsea/msigdb/cards/REACTOME_SYNTHESIS_OF_ACTIVE_UBIQUITIN_ROLES_OF_E1_AND_E2_ENZYMES	23	2.58502777869624	0.12986363557772	1
iPSC-CVPC	Heart	c2.cp.reactome	REACTOME_TFAP2_AP_2_FAMILY_REGULATES_TRANSCRIPTION_OF_CELL_CYCLE_FACTORS	http://www.gsea-msigdb.org/gsea/msigdb/cards/REACTOME_TFAP2_AP_2_FAMILY_REGULATES_TRANSCRIPTION_OF_CELL_CYCLE_FACTORS	2	0	1	1
iPSC-CVPC	Arteria	c2.cp.reactome	REACTOME_TFAP2_AP_2_FAMILY_REGULATES_TRANSCRIPTION_OF_CELL_CYCLE_FACTORS	http://www.gsea-msigdb.org/gsea/msigdb/cards/REACTOME_TFAP2_AP_2_FAMILY_REGULATES_TRANSCRIPTION_OF_CELL_CYCLE_FACTORS	2	0	1	1
iPSC-CVPC	Heart	c2.cp.reactome	REACTOME_CREB3_FACTORS_ACTIVATE_GENES	http://www.gsea-msigdb.org/gsea/msigdb/cards/REACTOME_CREB3_FACTORS_ACTIVATE_GENES	6	0	1	1
iPSC-CVPC	Arteria	c2.cp.reactome	REACTOME_CREB3_FACTORS_ACTIVATE_GENES	http://www.gsea-msigdb.org/gsea/msigdb/cards/REACTOME_CREB3_FACTORS_ACTIVATE_GENES	6	0	1	1
iPSC-CVPC	Heart	c2.cp.reactome	REACTOME_INLB_MEDIATED_ENTRY_OF_LISTERIA_MONOCYTOGENES_INTO_HOST_CELL	http://www.gsea-msigdb.org/gsea/msigdb/cards/REACTOME_INLB_MEDIATED_ENTRY_OF_LISTERIA_MONOCYTOGENES_INTO_HOST_CELL	12	0	1	1
iPSC-CVPC	Arteria	c2.cp.reactome	REACTOME_INLB_MEDIATED_ENTRY_OF_LISTERIA_MONOCYTOGENES_INTO_HOST_CELL	http://www.gsea-msigdb.org/gsea/msigdb/cards/REACTOME_INLB_MEDIATED_ENTRY_OF_LISTERIA_MONOCYTOGENES_INTO_HOST_CELL	12	5.74968943967525	0.0250867647821374	1
Heart	Arteria	c2.cp.reactome	REACTOME_RAB_GEFS_EXCHANGE_GTP_FOR_GDP_ON_RABS	http://www.gsea-msigdb.org/gsea/msigdb/cards/REACTOME_RAB_GEFS_EXCHANGE_GTP_FOR_GDP_ON_RABS	63	0	1	1
iPSC-CVPC	Heart	c2.cp.reactome	REACTOME_DIGESTION	http://www.gsea-msigdb.org/gsea/msigdb/cards/REACTOME_DIGESTION	2	0	1	1
iPSC-CVPC	Heart	c2.cp.reactome	REACTOME_ESR_MEDIATED_SIGNALING	http://www.gsea-msigdb.org/gsea/msigdb/cards/REACTOME_ESR_MEDIATED_SIGNALING	108	0.542671503314546	0.588524391520896	1
iPSC-CVPC	Arteria	c2.cp.reactome	REACTOME_ESR_MEDIATED_SIGNALING	http://www.gsea-msigdb.org/gsea/msigdb/cards/REACTOME_ESR_MEDIATED_SIGNALING	108	0.658539008195026	0.527173455858822	1
iPSC-CVPC	Heart	c2.cp.reactome	REACTOME_RUNX1_REGULATES_TRANSCRIPTION_OF_GENES_INVOLVED_IN_DIFFERENTIATION_OF_HSCS	http://www.gsea-msigdb.org/gsea/msigdb/cards/REACTOME_RUNX1_REGULATES_TRANSCRIPTION_OF_GENES_INVOLVED_IN_DIFFERENTIATION_OF_HSCS	56	1.64092071576147	0.436354389483612	1
iPSC-CVPC	Arteria	c2.cp.reactome	REACTOME_RUNX1_REGULATES_TRANSCRIPTION_OF_GENES_INVOLVED_IN_DIFFERENTIATION_OF_HSCS	http://www.gsea-msigdb.org/gsea/msigdb/cards/REACTOME_RUNX1_REGULATES_TRANSCRIPTION_OF_GENES_INVOLVED_IN_DIFFERENTIATION_OF_HSCS	56	2.07264419656783	0.127582650927175	1
iPSC-CVPC	Heart	c2.cp.reactome	REACTOME_RUNX1_REGULATES_TRANSCRIPTION_OF_GENES_INVOLVED_IN_DIFFERENTIATION_OF_KERATINOCYTES	http://www.gsea-msigdb.org/gsea/msigdb/cards/REACTOME_RUNX1_REGULATES_TRANSCRIPTION_OF_GENES_INVOLVED_IN_DIFFERENTIATION_OF_KERATINOCYTES	4	9.65033129400561	0.127248014972536	1
iPSC-CVPC	Arteria	c2.cp.reactome	REACTOME_RUNX1_REGULATES_TRANSCRIPTION_OF_GENES_INVOLVED_IN_DIFFERENTIATION_OF_KERATINOCYTES	http://www.gsea-msigdb.org/gsea/msigdb/cards/REACTOME_RUNX1_REGULATES_TRANSCRIPTION_OF_GENES_INVOLVED_IN_DIFFERENTIATION_OF_KERATINOCYTES	4	0	1	1
iPSC-CVPC	Arteria	c2.cp.reactome	REACTOME_RUNX1_REGULATES_TRANSCRIPTION_OF_GENES_INVOLVED_IN_INTERLEUKIN_SIGNALING	http://www.gsea-msigdb.org/gsea/msigdb/cards/REACTOME_RUNX1_REGULATES_TRANSCRIPTION_OF_GENES_INVOLVED_IN_INTERLEUKIN_SIGNALING	4	0	1	1
iPSC-CVPC	Heart	c2.cp.reactome	REACTOME_REGULATION_OF_RUNX2_EXPRESSION_AND_ACTIVITY	http://www.gsea-msigdb.org/gsea/msigdb/cards/REACTOME_REGULATION_OF_RUNX2_EXPRESSION_AND_ACTIVITY	43	2.17689627394592	0.173138362072348	1
iPSC-CVPC	Heart	c2.cp.reactome	REACTOME_RUNX2_REGULATES_CHONDROCYTE_MATURATION	http://www.gsea-msigdb.org/gsea/msigdb/cards/REACTOME_RUNX2_REGULATES_CHONDROCYTE_MATURATION	3	0	1	1
iPSC-CVPC	Heart	c2.cp.reactome	REACTOME_RUNX2_REGULATES_BONE_DEVELOPMENT	http://www.gsea-msigdb.org/gsea/msigdb/cards/REACTOME_RUNX2_REGULATES_BONE_DEVELOPMENT	22	0	1	1
iPSC-CVPC	Arteria	c2.cp.reactome	REACTOME_RUNX2_REGULATES_BONE_DEVELOPMENT	http://www.gsea-msigdb.org/gsea/msigdb/cards/REACTOME_RUNX2_REGULATES_BONE_DEVELOPMENT	22	0	0.630841230277534	1
Heart	Arteria	c2.cp.reactome	REACTOME_RUNX2_REGULATES_BONE_DEVELOPMENT	http://www.gsea-msigdb.org/gsea/msigdb/cards/REACTOME_RUNX2_REGULATES_BONE_DEVELOPMENT	22	0	1	1
iPSC-CVPC	Arteria	c2.cp.reactome	REACTOME_COLLAGEN_CHAIN_TRIMERIZATION	http://www.gsea-msigdb.org/gsea/msigdb/cards/REACTOME_COLLAGEN_CHAIN_TRIMERIZATION	33	1.72180034165572	0.425957286994129	1
Heart	Arteria	c2.cp.reactome	REACTOME_COLLAGEN_CHAIN_TRIMERIZATION	http://www.gsea-msigdb.org/gsea/msigdb/cards/REACTOME_COLLAGEN_CHAIN_TRIMERIZATION	33	0	1	1
Heart	Arteria	c2.cp.reactome	REACTOME_CRISTAE_FORMATION	http://www.gsea-msigdb.org/gsea/msigdb/cards/REACTOME_CRISTAE_FORMATION	15	7.24578962473044	0.137911327951284	1
iPSC-CVPC	Heart	c2.cp.reactome	REACTOME_PROCESSING_OF_SMDT1	http://www.gsea-msigdb.org/gsea/msigdb/cards/REACTOME_PROCESSING_OF_SMDT1	11	2.89443661038946	0.312305480267594	1
iPSC-CVPC	Arteria	c2.cp.reactome	REACTOME_PROCESSING_OF_SMDT1	http://www.gsea-msigdb.org/gsea/msigdb/cards/REACTOME_PROCESSING_OF_SMDT1	11	1.71933654701835	0.463429663316942	1
iPSC-CVPC	Heart	c2.cp.reactome	REACTOME_RUNX3_REGULATES_BCL2L11_BIM_TRANSCRIPTION	http://www.gsea-msigdb.org/gsea/msigdb/cards/REACTOME_RUNX3_REGULATES_BCL2L11_BIM_TRANSCRIPTION	4	0	1	1
iPSC-CVPC	Arteria	c2.cp.reactome	REACTOME_RUNX3_REGULATES_BCL2L11_BIM_TRANSCRIPTION	http://www.gsea-msigdb.org/gsea/msigdb/cards/REACTOME_RUNX3_REGULATES_BCL2L11_BIM_TRANSCRIPTION	4	0	1	1
Heart	Arteria	c2.cp.reactome	REACTOME_TRANSCRIPTIONAL_REGULATION_BY_E2F6	http://www.gsea-msigdb.org/gsea/msigdb/cards/REACTOME_TRANSCRIPTIONAL_REGULATION_BY_E2F6	24	0	1	1
iPSC-CVPC	Arteria	c2.cp.reactome	REACTOME_CARBOXYTERMINAL_POST_TRANSLATIONAL_MODIFICATIONS_OF_TUBULIN	http://www.gsea-msigdb.org/gsea/msigdb/cards/REACTOME_CARBOXYTERMINAL_POST_TRANSLATIONAL_MODIFICATIONS_OF_TUBULIN	20	0	0.62419150327376	1
Heart	Arteria	c2.cp.reactome	REACTOME_CARBOXYTERMINAL_POST_TRANSLATIONAL_MODIFICATIONS_OF_TUBULIN	http://www.gsea-msigdb.org/gsea/msigdb/cards/REACTOME_CARBOXYTERMINAL_POST_TRANSLATIONAL_MODIFICATIONS_OF_TUBULIN	20	0	1	1
Heart	Arteria	c2.cp.reactome	REACTOME_NUCLEOBASE_CATABOLISM	http://www.gsea-msigdb.org/gsea/msigdb/cards/REACTOME_NUCLEOBASE_CATABOLISM	22	0	1	1
iPSC-CVPC	Heart	c2.cp.reactome	REACTOME_METABOLISM_OF_STEROIDS	http://www.gsea-msigdb.org/gsea/msigdb/cards/REACTOME_METABOLISM_OF_STEROIDS	84	1.44977494538701	0.366019549229571	1
iPSC-CVPC	Arteria	c2.cp.reactome	REACTOME_METABOLISM_OF_STEROIDS	http://www.gsea-msigdb.org/gsea/msigdb/cards/REACTOME_METABOLISM_OF_STEROIDS	84	1.32499525691859	0.467198816497553	1
Heart	Arteria	c2.cp.reactome	REACTOME_METABOLISM_OF_STEROIDS	http://www.gsea-msigdb.org/gsea/msigdb/cards/REACTOME_METABOLISM_OF_STEROIDS	84	1.21463974655641	0.565577805716785	1
iPSC-CVPC	Heart	c2.cp.reactome	REACTOME_ASPARTATE_AND_ASPARAGINE_METABOLISM	http://www.gsea-msigdb.org/gsea/msigdb/cards/REACTOME_ASPARTATE_AND_ASPARAGINE_METABOLISM	4	9.65033129400561	0.127248014972536	1
iPSC-CVPC	Arteria	c2.cp.reactome	REACTOME_ASPARTATE_AND_ASPARAGINE_METABOLISM	http://www.gsea-msigdb.org/gsea/msigdb/cards/REACTOME_ASPARTATE_AND_ASPARAGINE_METABOLISM	4	0	1	1
iPSC-CVPC	Heart	c2.cp.reactome	REACTOME_DIGESTION_AND_ABSORPTION	http://www.gsea-msigdb.org/gsea/msigdb/cards/REACTOME_DIGESTION_AND_ABSORPTION	3	0	1	1
iPSC-CVPC	Arteria	c2.cp.reactome	REACTOME_DIGESTION_AND_ABSORPTION	http://www.gsea-msigdb.org/gsea/msigdb/cards/REACTOME_DIGESTION_AND_ABSORPTION	3	0	1	1
iPSC-CVPC	Heart	c2.cp.reactome	REACTOME_SIGNALING_BY_ERYTHROPOIETIN	http://www.gsea-msigdb.org/gsea/msigdb/cards/REACTOME_SIGNALING_BY_ERYTHROPOIETIN	18	0	1	1
Heart	Arteria	c2.cp.reactome	REACTOME_SIGNALING_BY_ERYTHROPOIETIN	http://www.gsea-msigdb.org/gsea/msigdb/cards/REACTOME_SIGNALING_BY_ERYTHROPOIETIN	18	0	1	1
iPSC-CVPC	Arteria	c2.cp.reactome	REACTOME_INTERLEUKIN_18_SIGNALING	http://www.gsea-msigdb.org/gsea/msigdb/cards/REACTOME_INTERLEUKIN_18_SIGNALING	3	0	1	1
iPSC-CVPC	Heart	c2.cp.reactome	REACTOME_NOTCH4_INTRACELLULAR_DOMAIN_REGULATES_TRANSCRIPTION	http://www.gsea-msigdb.org/gsea/msigdb/cards/REACTOME_NOTCH4_INTRACELLULAR_DOMAIN_REGULATES_TRANSCRIPTION	12	2.6311276912316	0.335331830253007	1
iPSC-CVPC	Arteria	c2.cp.reactome	REACTOME_NOTCH4_INTRACELLULAR_DOMAIN_REGULATES_TRANSCRIPTION	http://www.gsea-msigdb.org/gsea/msigdb/cards/REACTOME_NOTCH4_INTRACELLULAR_DOMAIN_REGULATES_TRANSCRIPTION	12	0	1	1
iPSC-CVPC	Heart	c2.cp.reactome	REACTOME_INTERLEUKIN_36_PATHWAY	http://www.gsea-msigdb.org/gsea/msigdb/cards/REACTOME_INTERLEUKIN_36_PATHWAY	1	0	1	1
iPSC-CVPC	Arteria	c2.cp.reactome	REACTOME_INTERLEUKIN_36_PATHWAY	http://www.gsea-msigdb.org/gsea/msigdb/cards/REACTOME_INTERLEUKIN_36_PATHWAY	1	0	1	1
Heart	Arteria	c2.cp.reactome	REACTOME_INTERLEUKIN_36_PATHWAY	http://www.gsea-msigdb.org/gsea/msigdb/cards/REACTOME_INTERLEUKIN_36_PATHWAY	1	0	1	1
iPSC-CVPC	Heart	c2.cp.reactome	REACTOME_ESTROGEN_DEPENDENT_GENE_EXPRESSION	http://www.gsea-msigdb.org/gsea/msigdb/cards/REACTOME_ESTROGEN_DEPENDENT_GENE_EXPRESSION	71	0.41117892728294	0.733473147067544	1
iPSC-CVPC	Heart	c2.cp.reactome	REACTOME_INTERLEUKIN_21_SIGNALING	http://www.gsea-msigdb.org/gsea/msigdb/cards/REACTOME_INTERLEUKIN_21_SIGNALING	7	0	1	1
iPSC-CVPC	Arteria	c2.cp.reactome	REACTOME_INTERLEUKIN_21_SIGNALING	http://www.gsea-msigdb.org/gsea/msigdb/cards/REACTOME_INTERLEUKIN_21_SIGNALING	7	2.86643075245736	0.32705832013432	1
iPSC-CVPC	Heart	c2.cp.reactome	REACTOME_MECP2_REGULATES_TRANSCRIPTION_OF_NEURONAL_LIGANDS	http://www.gsea-msigdb.org/gsea/msigdb/cards/REACTOME_MECP2_REGULATES_TRANSCRIPTION_OF_NEURONAL_LIGANDS	4	0	1	1
iPSC-CVPC	Arteria	c2.cp.reactome	REACTOME_MECP2_REGULATES_TRANSCRIPTION_OF_NEURONAL_LIGANDS	http://www.gsea-msigdb.org/gsea/msigdb/cards/REACTOME_MECP2_REGULATES_TRANSCRIPTION_OF_NEURONAL_LIGANDS	4	0	1	1
Heart	Arteria	c2.cp.reactome	REACTOME_MECP2_REGULATES_TRANSCRIPTION_OF_NEURONAL_LIGANDS	http://www.gsea-msigdb.org/gsea/msigdb/cards/REACTOME_MECP2_REGULATES_TRANSCRIPTION_OF_NEURONAL_LIGANDS	4	0	1	1
Heart	Arteria	c2.cp.reactome	REACTOME_NEGATIVE_REGULATORS_OF_DDX58_IFIH1_SIGNALING	http://www.gsea-msigdb.org/gsea/msigdb/cards/REACTOME_NEGATIVE_REGULATORS_OF_DDX58_IFIH1_SIGNALING	27	0	1	1
Heart	Arteria	c2.cp.reactome	REACTOME_MOLYBDENUM_COFACTOR_BIOSYNTHESIS	http://www.gsea-msigdb.org/gsea/msigdb/cards/REACTOME_MOLYBDENUM_COFACTOR_BIOSYNTHESIS	3	0	1	1
Heart	Arteria	c2.cp.reactome	REACTOME_ACTIVATED_NTRK3_SIGNALS_THROUGH_PI3K	http://www.gsea-msigdb.org/gsea/msigdb/cards/REACTOME_ACTIVATED_NTRK3_SIGNALS_THROUGH_PI3K	6	0	1	1
iPSC-CVPC	Heart	c2.cp.reactome	REACTOME_NEGATIVE_REGULATION_OF_NOTCH4_SIGNALING	http://www.gsea-msigdb.org/gsea/msigdb/cards/REACTOME_NEGATIVE_REGULATION_OF_NOTCH4_SIGNALING	36	2.64034254338033	0.118116115215576	1
iPSC-CVPC	Arteria	c2.cp.reactome	REACTOME_NEGATIVE_REGULATION_OF_NOTCH4_SIGNALING	http://www.gsea-msigdb.org/gsea/msigdb/cards/REACTOME_NEGATIVE_REGULATION_OF_NOTCH4_SIGNALING	36	2.15543870177735	0.133680150587064	1
Heart	Arteria	c2.cp.reactome	REACTOME_NEGATIVE_REGULATION_OF_NOTCH4_SIGNALING	http://www.gsea-msigdb.org/gsea/msigdb/cards/REACTOME_NEGATIVE_REGULATION_OF_NOTCH4_SIGNALING	36	2.89312465439589	0.299881821832123	1
Heart	Arteria	c2.cp.reactome	REACTOME_INSERTION_OF_TAIL_ANCHORED_PROTEINS_INTO_THE_ENDOPLASMIC_RETICULUM_MEMBRANE	http://www.gsea-msigdb.org/gsea/msigdb/cards/REACTOME_INSERTION_OF_TAIL_ANCHORED_PROTEINS_INTO_THE_ENDOPLASMIC_RETICULUM_MEMBRANE	14	0	1	1
iPSC-CVPC	Arteria	c2.cp.reactome	REACTOME_REGULATION_OF_LOCALIZATION_OF_FOXO_TRANSCRIPTION_FACTORS	http://www.gsea-msigdb.org/gsea/msigdb/cards/REACTOME_REGULATION_OF_LOCALIZATION_OF_FOXO_TRANSCRIPTION_FACTORS	7	0	1	1
iPSC-CVPC	Arteria	c2.cp.reactome	REACTOME_FOXO_MEDIATED_TRANSCRIPTION_OF_CELL_DEATH_GENES	http://www.gsea-msigdb.org/gsea/msigdb/cards/REACTOME_FOXO_MEDIATED_TRANSCRIPTION_OF_CELL_DEATH_GENES	14	1.32222215691555	0.547270630631346	1
Heart	Arteria	c2.cp.reactome	REACTOME_FOXO_MEDIATED_TRANSCRIPTION_OF_CELL_DEATH_GENES	http://www.gsea-msigdb.org/gsea/msigdb/cards/REACTOME_FOXO_MEDIATED_TRANSCRIPTION_OF_CELL_DEATH_GENES	14	0	1	1
iPSC-CVPC	Arteria	c2.cp.reactome	REACTOME_FOXO_MEDIATED_TRANSCRIPTION_OF_OXIDATIVE_STRESS_METABOLIC_AND_NEURONAL_GENES	http://www.gsea-msigdb.org/gsea/msigdb/cards/REACTOME_FOXO_MEDIATED_TRANSCRIPTION_OF_OXIDATIVE_STRESS_METABOLIC_AND_NEURONAL_GENES	18	2.15155712884977	0.260327334016662	1
Heart	Arteria	c2.cp.reactome	REACTOME_FOXO_MEDIATED_TRANSCRIPTION_OF_OXIDATIVE_STRESS_METABOLIC_AND_NEURONAL_GENES	http://www.gsea-msigdb.org/gsea/msigdb/cards/REACTOME_FOXO_MEDIATED_TRANSCRIPTION_OF_OXIDATIVE_STRESS_METABOLIC_AND_NEURONAL_GENES	18	0	1	1
iPSC-CVPC	Arteria	c2.cp.reactome	REACTOME_TRANSCRIPTIONAL_REGULATION_OF_GRANULOPOIESIS	http://www.gsea-msigdb.org/gsea/msigdb/cards/REACTOME_TRANSCRIPTIONAL_REGULATION_OF_GRANULOPOIESIS	30	1.91370345179414	0.226766477295605	1
Heart	Arteria	c2.cp.reactome	REACTOME_TRANSCRIPTIONAL_REGULATION_OF_GRANULOPOIESIS	http://www.gsea-msigdb.org/gsea/msigdb/cards/REACTOME_TRANSCRIPTIONAL_REGULATION_OF_GRANULOPOIESIS	30	0	1	1
iPSC-CVPC	Arteria	c2.cp.reactome	REACTOME_NEGATIVE_REGULATION_OF_NMDA_RECEPTOR_MEDIATED_NEURONAL_TRANSMISSION	http://www.gsea-msigdb.org/gsea/msigdb/cards/REACTOME_NEGATIVE_REGULATION_OF_NMDA_RECEPTOR_MEDIATED_NEURONAL_TRANSMISSION	12	1.56288361152648	0.492970723871524	1
Heart	Arteria	c2.cp.reactome	REACTOME_NEGATIVE_REGULATION_OF_NMDA_RECEPTOR_MEDIATED_NEURONAL_TRANSMISSION	http://www.gsea-msigdb.org/gsea/msigdb/cards/REACTOME_NEGATIVE_REGULATION_OF_NMDA_RECEPTOR_MEDIATED_NEURONAL_TRANSMISSION	12	9.22173853809305	0.111926645794903	1
iPSC-CVPC	Heart	c2.cp.reactome	REACTOME_THE_FATTY_ACID_CYCLING_MODEL	http://www.gsea-msigdb.org/gsea/msigdb/cards/REACTOME_THE_FATTY_ACID_CYCLING_MODEL	2	0	1	1
iPSC-CVPC	Arteria	c2.cp.reactome	REACTOME_THE_FATTY_ACID_CYCLING_MODEL	http://www.gsea-msigdb.org/gsea/msigdb/cards/REACTOME_THE_FATTY_ACID_CYCLING_MODEL	2	0	1	1
Heart	Arteria	c2.cp.reactome	REACTOME_THE_FATTY_ACID_CYCLING_MODEL	http://www.gsea-msigdb.org/gsea/msigdb/cards/REACTOME_THE_FATTY_ACID_CYCLING_MODEL	2	0	1	1
iPSC-CVPC	Arteria	c2.cp.reactome	REACTOME_NS1_MEDIATED_EFFECTS_ON_HOST_PATHWAYS	http://www.gsea-msigdb.org/gsea/msigdb/cards/REACTOME_NS1_MEDIATED_EFFECTS_ON_HOST_PATHWAYS	26	0.686769395472494	1	1
iPSC-CVPC	Heart	c2.cp.reactome	REACTOME_POLYMERASE_SWITCHING_ON_THE_C_STRAND_OF_THE_TELOMERE	http://www.gsea-msigdb.org/gsea/msigdb/cards/REACTOME_POLYMERASE_SWITCHING_ON_THE_C_STRAND_OF_THE_TELOMERE	12	0	1	1
iPSC-CVPC	Arteria	c2.cp.reactome	REACTOME_POLYMERASE_SWITCHING_ON_THE_C_STRAND_OF_THE_TELOMERE	http://www.gsea-msigdb.org/gsea/msigdb/cards/REACTOME_POLYMERASE_SWITCHING_ON_THE_C_STRAND_OF_THE_TELOMERE	12	0	1	1
Heart	Arteria	c2.cp.reactome	REACTOME_POLYMERASE_SWITCHING_ON_THE_C_STRAND_OF_THE_TELOMERE	http://www.gsea-msigdb.org/gsea/msigdb/cards/REACTOME_POLYMERASE_SWITCHING_ON_THE_C_STRAND_OF_THE_TELOMERE	12	0	1	1
iPSC-CVPC	Heart	c2.cp.reactome	REACTOME_SNRNP_ASSEMBLY	http://www.gsea-msigdb.org/gsea/msigdb/cards/REACTOME_SNRNP_ASSEMBLY	37	1.65477868477453	0.352484928466676	1
iPSC-CVPC	Arteria	c2.cp.reactome	REACTOME_SNRNP_ASSEMBLY	http://www.gsea-msigdb.org/gsea/msigdb/cards/REACTOME_SNRNP_ASSEMBLY	37	0.981784279566823	1	1
iPSC-CVPC	Heart	c2.cp.reactome	REACTOME_RETINOID_CYCLE_DISEASE_EVENTS	http://www.gsea-msigdb.org/gsea/msigdb/cards/REACTOME_RETINOID_CYCLE_DISEASE_EVENTS	4	0	1	1
iPSC-CVPC	Arteria	c2.cp.reactome	REACTOME_RETINOID_CYCLE_DISEASE_EVENTS	http://www.gsea-msigdb.org/gsea/msigdb/cards/REACTOME_RETINOID_CYCLE_DISEASE_EVENTS	4	0	1	1
iPSC-CVPC	Heart	c2.cp.reactome	REACTOME_INITIATION_OF_NUCLEAR_ENVELOPE_NE_REFORMATION	http://www.gsea-msigdb.org/gsea/msigdb/cards/REACTOME_INITIATION_OF_NUCLEAR_ENVELOPE_NE_REFORMATION	15	2.06680724487839	0.399898977839414	1
iPSC-CVPC	Arteria	c2.cp.reactome	REACTOME_INITIATION_OF_NUCLEAR_ENVELOPE_NE_REFORMATION	http://www.gsea-msigdb.org/gsea/msigdb/cards/REACTOME_INITIATION_OF_NUCLEAR_ENVELOPE_NE_REFORMATION	15	0	1	1
iPSC-CVPC	Heart	c2.cp.reactome	REACTOME_CHROMATIN_MODIFYING_ENZYMES	http://www.gsea-msigdb.org/gsea/msigdb/cards/REACTOME_CHROMATIN_MODIFYING_ENZYMES	174	0.502793002582108	0.290490410537884	1
iPSC-CVPC	Arteria	c2.cp.reactome	REACTOME_CHROMATIN_MODIFYING_ENZYMES	http://www.gsea-msigdb.org/gsea/msigdb/cards/REACTOME_CHROMATIN_MODIFYING_ENZYMES	174	0.825693645429274	0.737515032200293	1
iPSC-CVPC	Heart	c2.cp.reactome	REACTOME_LOSS_OF_FUNCTION_OF_SMAD2_3_IN_CANCER	http://www.gsea-msigdb.org/gsea/msigdb/cards/REACTOME_LOSS_OF_FUNCTION_OF_SMAD2_3_IN_CANCER	5	0	1	1
iPSC-CVPC	Arteria	c2.cp.reactome	REACTOME_LOSS_OF_FUNCTION_OF_SMAD2_3_IN_CANCER	http://www.gsea-msigdb.org/gsea/msigdb/cards/REACTOME_LOSS_OF_FUNCTION_OF_SMAD2_3_IN_CANCER	5	0	1	1
Heart	Arteria	c2.cp.reactome	REACTOME_LOSS_OF_FUNCTION_OF_SMAD2_3_IN_CANCER	http://www.gsea-msigdb.org/gsea/msigdb/cards/REACTOME_LOSS_OF_FUNCTION_OF_SMAD2_3_IN_CANCER	5	0	1	1
iPSC-CVPC	Heart	c2.cp.reactome	REACTOME_RIPK1_MEDIATED_REGULATED_NECROSIS	http://www.gsea-msigdb.org/gsea/msigdb/cards/REACTOME_RIPK1_MEDIATED_REGULATED_NECROSIS	16	0	1	1
iPSC-CVPC	Arteria	c2.cp.reactome	REACTOME_RIPK1_MEDIATED_REGULATED_NECROSIS	http://www.gsea-msigdb.org/gsea/msigdb/cards/REACTOME_RIPK1_MEDIATED_REGULATED_NECROSIS	16	1.14571734678302	0.595764171255043	1
iPSC-CVPC	Heart	c2.cp.reactome	REACTOME_ACTIVATION_OF_ANTERIOR_HOX_GENES_IN_HINDBRAIN_DEVELOPMENT_DURING_EARLY_EMBRYOGENESIS	http://www.gsea-msigdb.org/gsea/msigdb/cards/REACTOME_ACTIVATION_OF_ANTERIOR_HOX_GENES_IN_HINDBRAIN_DEVELOPMENT_DURING_EARLY_EMBRYOGENESIS	43	0	0.404021604519162	1
iPSC-CVPC	Arteria	c2.cp.reactome	REACTOME_ACTIVATION_OF_ANTERIOR_HOX_GENES_IN_HINDBRAIN_DEVELOPMENT_DURING_EARLY_EMBRYOGENESIS	http://www.gsea-msigdb.org/gsea/msigdb/cards/REACTOME_ACTIVATION_OF_ANTERIOR_HOX_GENES_IN_HINDBRAIN_DEVELOPMENT_DURING_EARLY_EMBRYOGENESIS	43	0.408117054045409	0.730959275499352	1
iPSC-CVPC	Heart	c2.cp.reactome	REACTOME_DEPOSITION_OF_NEW_CENPA_CONTAINING_NUCLEOSOMES_AT_THE_CENTROMERE	http://www.gsea-msigdb.org/gsea/msigdb/cards/REACTOME_DEPOSITION_OF_NEW_CENPA_CONTAINING_NUCLEOSOMES_AT_THE_CENTROMERE	26	3.79198416066391	0.0546572528482803	1
iPSC-CVPC	Arteria	c2.cp.reactome	REACTOME_DEPOSITION_OF_NEW_CENPA_CONTAINING_NUCLEOSOMES_AT_THE_CENTROMERE	http://www.gsea-msigdb.org/gsea/msigdb/cards/REACTOME_DEPOSITION_OF_NEW_CENPA_CONTAINING_NUCLEOSOMES_AT_THE_CENTROMERE	26	1.43325964912756	0.652109004375886	1
Heart	Arteria	c2.cp.reactome	REACTOME_DEPOSITION_OF_NEW_CENPA_CONTAINING_NUCLEOSOMES_AT_THE_CENTROMERE	http://www.gsea-msigdb.org/gsea/msigdb/cards/REACTOME_DEPOSITION_OF_NEW_CENPA_CONTAINING_NUCLEOSOMES_AT_THE_CENTROMERE	26	0	1	1
iPSC-CVPC	Heart	c2.cp.reactome	REACTOME_SIGNALING_BY_PTK6	http://www.gsea-msigdb.org/gsea/msigdb/cards/REACTOME_SIGNALING_BY_PTK6	37	1.65477868477453	0.352484928466676	1
iPSC-CVPC	Arteria	c2.cp.reactome	REACTOME_SIGNALING_BY_PTK6	http://www.gsea-msigdb.org/gsea/msigdb/cards/REACTOME_SIGNALING_BY_PTK6	37	2.69898186248349	0.0503594371520387	1
iPSC-CVPC	Heart	c2.cp.reactome	REACTOME_NR1H2_NR1H3_REGULATE_GENE_EXPRESSION_LINKED_TO_LIPOGENESIS	http://www.gsea-msigdb.org/gsea/msigdb/cards/REACTOME_NR1H2_NR1H3_REGULATE_GENE_EXPRESSION_LINKED_TO_LIPOGENESIS	6	0	1	1
iPSC-CVPC	Arteria	c2.cp.reactome	REACTOME_NR1H2_NR1H3_REGULATE_GENE_EXPRESSION_LINKED_TO_LIPOGENESIS	http://www.gsea-msigdb.org/gsea/msigdb/cards/REACTOME_NR1H2_NR1H3_REGULATE_GENE_EXPRESSION_LINKED_TO_LIPOGENESIS	6	3.43989946228232	0.28787014889611	1
iPSC-CVPC	Heart	c2.cp.reactome	REACTOME_NR1H2_NR1H3_REGULATE_GENE_EXPRESSION_TO_LIMIT_CHOLESTEROL_UPTAKE	http://www.gsea-msigdb.org/gsea/msigdb/cards/REACTOME_NR1H2_NR1H3_REGULATE_GENE_EXPRESSION_TO_LIMIT_CHOLESTEROL_UPTAKE	4	0	1	1
iPSC-CVPC	Arteria	c2.cp.reactome	REACTOME_NR1H2_NR1H3_REGULATE_GENE_EXPRESSION_TO_LIMIT_CHOLESTEROL_UPTAKE	http://www.gsea-msigdb.org/gsea/msigdb/cards/REACTOME_NR1H2_NR1H3_REGULATE_GENE_EXPRESSION_TO_LIMIT_CHOLESTEROL_UPTAKE	4	0	1	1
iPSC-CVPC	Heart	c2.cp.reactome	REACTOME_NGF_STIMULATED_TRANSCRIPTION	http://www.gsea-msigdb.org/gsea/msigdb/cards/REACTOME_NGF_STIMULATED_TRANSCRIPTION	24	0	1	1
Heart	Arteria	c2.cp.reactome	REACTOME_HCMV_EARLY_EVENTS	http://www.gsea-msigdb.org/gsea/msigdb/cards/REACTOME_HCMV_EARLY_EVENTS	56	1.83786130973383	0.425979048836957	1
Heart	Arteria	c2.cp.reactome	REACTOME_POSTMITOTIC_NUCLEAR_PORE_COMPLEX_NPC_REFORMATION	http://www.gsea-msigdb.org/gsea/msigdb/cards/REACTOME_POSTMITOTIC_NUCLEAR_PORE_COMPLEX_NPC_REFORMATION	20	5.33720283975796	0.179555904029851	1
iPSC-CVPC	Arteria	c2.cp.reactome	REACTOME_EGR2_AND_SOX10_MEDIATED_INITIATION_OF_SCHWANN_CELL_MYELINATION	http://www.gsea-msigdb.org/gsea/msigdb/cards/REACTOME_EGR2_AND_SOX10_MEDIATED_INITIATION_OF_SCHWANN_CELL_MYELINATION	19	0	0.622201972793475	1
iPSC-CVPC	Heart	c2.cp.reactome	REACTOME_NR1H2_NR1H3_REGULATE_GENE_EXPRESSION_TO_CONTROL_BILE_ACID_HOMEOSTASIS	http://www.gsea-msigdb.org/gsea/msigdb/cards/REACTOME_NR1H2_NR1H3_REGULATE_GENE_EXPRESSION_TO_CONTROL_BILE_ACID_HOMEOSTASIS	6	0	1	1
iPSC-CVPC	Arteria	c2.cp.reactome	REACTOME_NR1H2_NR1H3_REGULATE_GENE_EXPRESSION_TO_CONTROL_BILE_ACID_HOMEOSTASIS	http://www.gsea-msigdb.org/gsea/msigdb/cards/REACTOME_NR1H2_NR1H3_REGULATE_GENE_EXPRESSION_TO_CONTROL_BILE_ACID_HOMEOSTASIS	6	3.43989946228232	0.28787014889611	1
Heart	Arteria	c2.cp.reactome	REACTOME_RESPONSE_OF_EIF2AK4_GCN2_TO_AMINO_ACID_DEFICIENCY	http://www.gsea-msigdb.org/gsea/msigdb/cards/REACTOME_RESPONSE_OF_EIF2AK4_GCN2_TO_AMINO_ACID_DEFICIENCY	35	0	1	1
iPSC-CVPC	Heart	c2.cp.reactome	REACTOME_SUPPRESSION_OF_APOPTOSIS	http://www.gsea-msigdb.org/gsea/msigdb/cards/REACTOME_SUPPRESSION_OF_APOPTOSIS	6	0	1	1
iPSC-CVPC	Arteria	c2.cp.reactome	REACTOME_SUPPRESSION_OF_APOPTOSIS	http://www.gsea-msigdb.org/gsea/msigdb/cards/REACTOME_SUPPRESSION_OF_APOPTOSIS	6	3.43989946228232	0.28787014889611	1
iPSC-CVPC	Heart	c2.cp.reactome	REACTOME_INFECTION_WITH_MYCOBACTERIUM_TUBERCULOSIS	http://www.gsea-msigdb.org/gsea/msigdb/cards/REACTOME_INFECTION_WITH_MYCOBACTERIUM_TUBERCULOSIS	18	0	1	1
iPSC-CVPC	Arteria	c2.cp.reactome	REACTOME_INFECTION_WITH_MYCOBACTERIUM_TUBERCULOSIS	http://www.gsea-msigdb.org/gsea/msigdb/cards/REACTOME_INFECTION_WITH_MYCOBACTERIUM_TUBERCULOSIS	18	3.44825597083733	0.0729863598110813	1
iPSC-CVPC	Heart	c2.cp.reactome	REACTOME_PREVENTION_OF_PHAGOSOMAL_LYSOSOMAL_FUSION	http://www.gsea-msigdb.org/gsea/msigdb/cards/REACTOME_PREVENTION_OF_PHAGOSOMAL_LYSOSOMAL_FUSION	7	0	1	1
iPSC-CVPC	Arteria	c2.cp.reactome	REACTOME_PREVENTION_OF_PHAGOSOMAL_LYSOSOMAL_FUSION	http://www.gsea-msigdb.org/gsea/msigdb/cards/REACTOME_PREVENTION_OF_PHAGOSOMAL_LYSOSOMAL_FUSION	7	2.86643075245736	0.32705832013432	1
iPSC-CVPC	Heart	c2.cp.reactome	REACTOME_MODULATION_BY_MTB_OF_HOST_IMMUNE_SYSTEM	http://www.gsea-msigdb.org/gsea/msigdb/cards/REACTOME_MODULATION_BY_MTB_OF_HOST_IMMUNE_SYSTEM	4	0	1	1
iPSC-CVPC	Arteria	c2.cp.reactome	REACTOME_MODULATION_BY_MTB_OF_HOST_IMMUNE_SYSTEM	http://www.gsea-msigdb.org/gsea/msigdb/cards/REACTOME_MODULATION_BY_MTB_OF_HOST_IMMUNE_SYSTEM	4	17.222576295752	0.0168225603731435	1
iPSC-CVPC	Heart	c2.cp.reactome	REACTOME_ALPHA_PROTEIN_KINASE_1_SIGNALING_PATHWAY	http://www.gsea-msigdb.org/gsea/msigdb/cards/REACTOME_ALPHA_PROTEIN_KINASE_1_SIGNALING_PATHWAY	9	0	1	1
iPSC-CVPC	Arteria	c2.cp.reactome	REACTOME_ALPHA_PROTEIN_KINASE_1_SIGNALING_PATHWAY	http://www.gsea-msigdb.org/gsea/msigdb/cards/REACTOME_ALPHA_PROTEIN_KINASE_1_SIGNALING_PATHWAY	9	2.14962403857217	0.399093657395531	1
Heart	Arteria	c2.cp.reactome	REACTOME_ALPHA_PROTEIN_KINASE_1_SIGNALING_PATHWAY	http://www.gsea-msigdb.org/gsea/msigdb/cards/REACTOME_ALPHA_PROTEIN_KINASE_1_SIGNALING_PATHWAY	9	0	1	1
iPSC-CVPC	Heart	c2.cp.reactome	REACTOME_LTC4_CYSLTR_MEDIATED_IL4_PRODUCTION	http://www.gsea-msigdb.org/gsea/msigdb/cards/REACTOME_LTC4_CYSLTR_MEDIATED_IL4_PRODUCTION	2	0	1	1
iPSC-CVPC	Arteria	c2.cp.reactome	REACTOME_LTC4_CYSLTR_MEDIATED_IL4_PRODUCTION	http://www.gsea-msigdb.org/gsea/msigdb/cards/REACTOME_LTC4_CYSLTR_MEDIATED_IL4_PRODUCTION	2	0	1	1
Heart	Arteria	c2.cp.reactome	REACTOME_LTC4_CYSLTR_MEDIATED_IL4_PRODUCTION	http://www.gsea-msigdb.org/gsea/msigdb/cards/REACTOME_LTC4_CYSLTR_MEDIATED_IL4_PRODUCTION	2	0	1	1
iPSC-CVPC	Heart	c2.cp.reactome	REACTOME_SIGNALING_BY_ERBB2_ECD_MUTANTS	http://www.gsea-msigdb.org/gsea/msigdb/cards/REACTOME_SIGNALING_BY_ERBB2_ECD_MUTANTS	12	0	1	1
iPSC-CVPC	Arteria	c2.cp.reactome	REACTOME_SIGNALING_BY_ERBB2_ECD_MUTANTS	http://www.gsea-msigdb.org/gsea/msigdb/cards/REACTOME_SIGNALING_BY_ERBB2_ECD_MUTANTS	12	3.44407057775882	0.138477997216538	1
iPSC-CVPC	Heart	c2.cp.reactome	REACTOME_SIGNALING_BY_PDGFR_IN_DISEASE	http://www.gsea-msigdb.org/gsea/msigdb/cards/REACTOME_SIGNALING_BY_PDGFR_IN_DISEASE	18	1.70163520480477	0.458209802682747	1
iPSC-CVPC	Arteria	c2.cp.reactome	REACTOME_SIGNALING_BY_PDGFR_IN_DISEASE	http://www.gsea-msigdb.org/gsea/msigdb/cards/REACTOME_SIGNALING_BY_PDGFR_IN_DISEASE	18	2.15155712884977	0.260327334016662	1
Heart	Arteria	c2.cp.reactome	REACTOME_SIGNALING_BY_PDGFR_IN_DISEASE	http://www.gsea-msigdb.org/gsea/msigdb/cards/REACTOME_SIGNALING_BY_PDGFR_IN_DISEASE	18	0	1	1
iPSC-CVPC	Arteria	c2.cp.reactome	REACTOME_SIGNALING_BY_PDGFRA_TRANSMEMBRANE_JUXTAMEMBRANE_AND_KINASE_DOMAIN_MUTANTS	http://www.gsea-msigdb.org/gsea/msigdb/cards/REACTOME_SIGNALING_BY_PDGFRA_TRANSMEMBRANE_JUXTAMEMBRANE_AND_KINASE_DOMAIN_MUTANTS	10	4.30576894340505	0.101401589880583	1
Heart	Arteria	c2.cp.reactome	REACTOME_SIGNALING_BY_PDGFRA_TRANSMEMBRANE_JUXTAMEMBRANE_AND_KINASE_DOMAIN_MUTANTS	http://www.gsea-msigdb.org/gsea/msigdb/cards/REACTOME_SIGNALING_BY_PDGFRA_TRANSMEMBRANE_JUXTAMEMBRANE_AND_KINASE_DOMAIN_MUTANTS	10	0	1	1
iPSC-CVPC	Heart	c2.cp.reactome	REACTOME_SIGNALING_BY_MEMBRANE_TETHERED_FUSIONS_OF_PDGFRA_OR_PDGFRB	http://www.gsea-msigdb.org/gsea/msigdb/cards/REACTOME_SIGNALING_BY_MEMBRANE_TETHERED_FUSIONS_OF_PDGFRA_OR_PDGFRB	5	7.23719780199253	0.156451544699296	1
iPSC-CVPC	Arteria	c2.cp.reactome	REACTOME_SIGNALING_BY_MEMBRANE_TETHERED_FUSIONS_OF_PDGFRA_OR_PDGFRB	http://www.gsea-msigdb.org/gsea/msigdb/cards/REACTOME_SIGNALING_BY_MEMBRANE_TETHERED_FUSIONS_OF_PDGFRA_OR_PDGFRB	5	0	1	1
Heart	Arteria	c2.cp.reactome	REACTOME_SIGNALING_BY_MEMBRANE_TETHERED_FUSIONS_OF_PDGFRA_OR_PDGFRB	http://www.gsea-msigdb.org/gsea/msigdb/cards/REACTOME_SIGNALING_BY_MEMBRANE_TETHERED_FUSIONS_OF_PDGFRA_OR_PDGFRB	5	0	1	1
iPSC-CVPC	Arteria	c2.cp.reactome	REACTOME_NERVOUS_SYSTEM_DEVELOPMENT	http://www.gsea-msigdb.org/gsea/msigdb/cards/REACTOME_NERVOUS_SYSTEM_DEVELOPMENT	329	1.36700143300669	0.141198196084687	1
Heart	Arteria	c2.cp.reactome	REACTOME_NERVOUS_SYSTEM_DEVELOPMENT	http://www.gsea-msigdb.org/gsea/msigdb/cards/REACTOME_NERVOUS_SYSTEM_DEVELOPMENT	329	1.58076003931019	0.259788763898115	1
iPSC-CVPC	Heart	c5.bp	GO_CELLULAR_RESPONSE_TO_LIPOPROTEIN_PARTICLE_STIMULUS	http://www.gsea-msigdb.org/gsea/msigdb/cards/GO_CELLULAR_RESPONSE_TO_LIPOPROTEIN_PARTICLE_STIMULUS	22	0	1	1
iPSC-CVPC	Arteria	c5.bp	GO_CELLULAR_RESPONSE_TO_LIPOPROTEIN_PARTICLE_STIMULUS	http://www.gsea-msigdb.org/gsea/msigdb/cards/GO_CELLULAR_RESPONSE_TO_LIPOPROTEIN_PARTICLE_STIMULUS	22	0	0.630841230277534	1
iPSC-CVPC	Heart	c5.bp	GO_POSITIVE_REGULATION_OF_KINASE_ACTIVITY	http://www.gsea-msigdb.org/gsea/msigdb/cards/GO_POSITIVE_REGULATION_OF_KINASE_ACTIVITY	347	0.853359449282443	0.761305844138828	1
iPSC-CVPC	Arteria	c5.bp	GO_POSITIVE_REGULATION_OF_KINASE_ACTIVITY	http://www.gsea-msigdb.org/gsea/msigdb/cards/GO_POSITIVE_REGULATION_OF_KINASE_ACTIVITY	347	0.661264718507914	0.186031367213254	1
iPSC-CVPC	Heart	c5.bp	GO_POTASSIUM_ION_TRANSPORT	http://www.gsea-msigdb.org/gsea/msigdb/cards/GO_POTASSIUM_ION_TRANSPORT	88	1.38021239860427	0.541203090510121	1
iPSC-CVPC	Arteria	c5.bp	GO_POTASSIUM_ION_TRANSPORT	http://www.gsea-msigdb.org/gsea/msigdb/cards/GO_POTASSIUM_ION_TRANSPORT	88	2.22337267111156	0.0290049175431807	1
Heart	Arteria	c5.bp	GO_POTASSIUM_ION_TRANSPORT	http://www.gsea-msigdb.org/gsea/msigdb/cards/GO_POTASSIUM_ION_TRANSPORT	88	2.36629405618028	0.214540118419082	1
iPSC-CVPC	Heart	c5.bp	GO_REGULATION_OF_T_CELL_RECEPTOR_SIGNALING_PATHWAY	http://www.gsea-msigdb.org/gsea/msigdb/cards/GO_REGULATION_OF_T_CELL_RECEPTOR_SIGNALING_PATHWAY	27	0	1	1
Heart	Arteria	c5.bp	GO_APICAL_PROTEIN_LOCALIZATION	http://www.gsea-msigdb.org/gsea/msigdb/cards/GO_APICAL_PROTEIN_LOCALIZATION	9	0	1	1
iPSC-CVPC	Arteria	c5.bp	GO_REGULATION_OF_ESTABLISHMENT_OF_PLANAR_POLARITY	http://www.gsea-msigdb.org/gsea/msigdb/cards/GO_REGULATION_OF_ESTABLISHMENT_OF_PLANAR_POLARITY	72	1.28464946271992	0.597798144969573	1
Heart	Arteria	c5.bp	GO_NEUROMUSCULAR_JUNCTION_DEVELOPMENT	http://www.gsea-msigdb.org/gsea/msigdb/cards/GO_NEUROMUSCULAR_JUNCTION_DEVELOPMENT	31	0	1	1
iPSC-CVPC	Heart	c5.bp	GO_POSITIVE_REGULATION_OF_CALCIUM_ION_TRANSPORT	http://www.gsea-msigdb.org/gsea/msigdb/cards/GO_POSITIVE_REGULATION_OF_CALCIUM_ION_TRANSPORT	56	1.64092071576147	0.436354389483612	1
iPSC-CVPC	Arteria	c5.bp	GO_POSITIVE_REGULATION_OF_CALCIUM_ION_TRANSPORT	http://www.gsea-msigdb.org/gsea/msigdb/cards/GO_POSITIVE_REGULATION_OF_CALCIUM_ION_TRANSPORT	56	0.972443571677611	1	1
iPSC-CVPC	Arteria	c5.bp	GO_REGULATION_OF_DOUBLE_STRAND_BREAK_REPAIR	http://www.gsea-msigdb.org/gsea/msigdb/cards/GO_REGULATION_OF_DOUBLE_STRAND_BREAK_REPAIR	50	2.35674836333894	0.0550727034088075	1
iPSC-CVPC	Heart	c5.bp	GO_DENDRITE_DEVELOPMENT	http://www.gsea-msigdb.org/gsea/msigdb/cards/GO_DENDRITE_DEVELOPMENT	165	1.28578692715846	0.507571557474159	1
Heart	Arteria	c5.bp	GO_DENDRITE_DEVELOPMENT	http://www.gsea-msigdb.org/gsea/msigdb/cards/GO_DENDRITE_DEVELOPMENT	165	1.88912190403385	0.22138588605437	1
iPSC-CVPC	Heart	c5.bp	GO_MEMORY	http://www.gsea-msigdb.org/gsea/msigdb/cards/GO_MEMORY	58	1.03220061463546	0.720941836799748	1
iPSC-CVPC	Arteria	c5.bp	GO_MEMORY	http://www.gsea-msigdb.org/gsea/msigdb/cards/GO_MEMORY	58	0	0.0760891669791843	1
iPSC-CVPC	Heart	c5.bp	GO_NEURON_DEVELOPMENT	http://www.gsea-msigdb.org/gsea/msigdb/cards/GO_NEURON_DEVELOPMENT	643	0.773959036699504	0.364986204077055	1
iPSC-CVPC	Arteria	c5.bp	GO_NEURON_DEVELOPMENT	http://www.gsea-msigdb.org/gsea/msigdb/cards/GO_NEURON_DEVELOPMENT	643	1.11721067851934	0.531621307438942	1
iPSC-CVPC	Heart	c5.bp	GO_ENDOTHELIAL_CELL_DEVELOPMENT	http://www.gsea-msigdb.org/gsea/msigdb/cards/GO_ENDOTHELIAL_CELL_DEVELOPMENT	34	0.875307657216244	1	1
iPSC-CVPC	Arteria	c5.bp	GO_ENDOTHELIAL_CELL_DEVELOPMENT	http://www.gsea-msigdb.org/gsea/msigdb/cards/GO_ENDOTHELIAL_CELL_DEVELOPMENT	34	1.07410632471942	0.710803280946435	1
iPSC-CVPC	Heart	c5.bp	GO_POSITIVE_REGULATION_OF_MYOTUBE_DIFFERENTIATION	http://www.gsea-msigdb.org/gsea/msigdb/cards/GO_POSITIVE_REGULATION_OF_MYOTUBE_DIFFERENTIATION	20	0	1	1
iPSC-CVPC	Arteria	c5.bp	GO_POSITIVE_REGULATION_OF_MYOTUBE_DIFFERENTIATION	http://www.gsea-msigdb.org/gsea/msigdb/cards/GO_POSITIVE_REGULATION_OF_MYOTUBE_DIFFERENTIATION	20	0.904174230095951	1	1
iPSC-CVPC	Heart	c5.bp	GO_MULTICELLULAR_ORGANISM_AGING	http://www.gsea-msigdb.org/gsea/msigdb/cards/GO_MULTICELLULAR_ORGANISM_AGING	17	0	1	1
iPSC-CVPC	Arteria	c5.bp	GO_MULTICELLULAR_ORGANISM_AGING	http://www.gsea-msigdb.org/gsea/msigdb/cards/GO_MULTICELLULAR_ORGANISM_AGING	17	2.29512503823533	0.239511670216042	1
iPSC-CVPC	Heart	c5.bp	GO_LIPID_MODIFICATION	http://www.gsea-msigdb.org/gsea/msigdb/cards/GO_LIPID_MODIFICATION	148	1.22472290185246	0.640441815874593	1
iPSC-CVPC	Arteria	c5.bp	GO_LIPID_MODIFICATION	http://www.gsea-msigdb.org/gsea/msigdb/cards/GO_LIPID_MODIFICATION	148	0.981595489708521	1	1
iPSC-CVPC	Heart	c5.bp	GO_NEGATIVE_REGULATION_OF_PROTEIN_CONTAINING_COMPLEX_ASSEMBLY	http://www.gsea-msigdb.org/gsea/msigdb/cards/GO_NEGATIVE_REGULATION_OF_PROTEIN_CONTAINING_COMPLEX_ASSEMBLY	88	0.670178451634023	1	1
iPSC-CVPC	Arteria	c5.bp	GO_NEGATIVE_REGULATION_OF_PROTEIN_CONTAINING_COMPLEX_ASSEMBLY	http://www.gsea-msigdb.org/gsea/msigdb/cards/GO_NEGATIVE_REGULATION_OF_PROTEIN_CONTAINING_COMPLEX_ASSEMBLY	88	1.03538580529761	0.81521578129942	1
Heart	Arteria	c5.bp	GO_NEGATIVE_REGULATION_OF_PROTEIN_CONTAINING_COMPLEX_ASSEMBLY	http://www.gsea-msigdb.org/gsea/msigdb/cards/GO_NEGATIVE_REGULATION_OF_PROTEIN_CONTAINING_COMPLEX_ASSEMBLY	88	0	1	1
iPSC-CVPC	Heart	c5.bp	GO_SINGLE_FERTILIZATION	http://www.gsea-msigdb.org/gsea/msigdb/cards/GO_SINGLE_FERTILIZATION	45	0.65579010562985	1	1
iPSC-CVPC	Arteria	c5.bp	GO_SINGLE_FERTILIZATION	http://www.gsea-msigdb.org/gsea/msigdb/cards/GO_SINGLE_FERTILIZATION	45	0.389489440576866	0.516728140091193	1
iPSC-CVPC	Heart	c5.bp	GO_NEGATIVE_REGULATION_OF_MAP_KINASE_ACTIVITY	http://www.gsea-msigdb.org/gsea/msigdb/cards/GO_NEGATIVE_REGULATION_OF_MAP_KINASE_ACTIVITY	44	2.12357724389968	0.181520833347472	1
Heart	Arteria	c5.bp	GO_NEGATIVE_REGULATION_OF_MAP_KINASE_ACTIVITY	http://www.gsea-msigdb.org/gsea/msigdb/cards/GO_NEGATIVE_REGULATION_OF_MAP_KINASE_ACTIVITY	44	0	1	1
iPSC-CVPC	Heart	c5.bp	GO_DENTATE_GYRUS_DEVELOPMENT	http://www.gsea-msigdb.org/gsea/msigdb/cards/GO_DENTATE_GYRUS_DEVELOPMENT	8	0	1	1
iPSC-CVPC	Arteria	c5.bp	GO_DENTATE_GYRUS_DEVELOPMENT	http://www.gsea-msigdb.org/gsea/msigdb/cards/GO_DENTATE_GYRUS_DEVELOPMENT	8	0	1	1
iPSC-CVPC	Heart	c5.bp	GO_EXCRETION	http://www.gsea-msigdb.org/gsea/msigdb/cards/GO_EXCRETION	21	0	1	1
iPSC-CVPC	Heart	c5.bp	GO_DNA_TEMPLATED_TRANSCRIPTION_ELONGATION	http://www.gsea-msigdb.org/gsea/msigdb/cards/GO_DNA_TEMPLATED_TRANSCRIPTION_ELONGATION	75	1.20571906920981	0.740280358840599	1
iPSC-CVPC	Arteria	c5.bp	GO_DNA_TEMPLATED_TRANSCRIPTION_ELONGATION	http://www.gsea-msigdb.org/gsea/msigdb/cards/GO_DNA_TEMPLATED_TRANSCRIPTION_ELONGATION	75	1.49912695561222	0.306443699944952	1
Heart	Arteria	c5.bp	GO_N_GLYCAN_PROCESSING	http://www.gsea-msigdb.org/gsea/msigdb/cards/GO_N_GLYCAN_PROCESSING	10	0	1	1
iPSC-CVPC	Heart	c5.bp	GO_G_PROTEIN_COUPLED_PURINERGIC_RECEPTOR_SIGNALING_PATHWAY	http://www.gsea-msigdb.org/gsea/msigdb/cards/GO_G_PROTEIN_COUPLED_PURINERGIC_RECEPTOR_SIGNALING_PATHWAY	7	0	1	1
iPSC-CVPC	Arteria	c5.bp	GO_G_PROTEIN_COUPLED_PURINERGIC_RECEPTOR_SIGNALING_PATHWAY	http://www.gsea-msigdb.org/gsea/msigdb/cards/GO_G_PROTEIN_COUPLED_PURINERGIC_RECEPTOR_SIGNALING_PATHWAY	7	0	1	1
Heart	Arteria	c5.bp	GO_G_PROTEIN_COUPLED_PURINERGIC_RECEPTOR_SIGNALING_PATHWAY	http://www.gsea-msigdb.org/gsea/msigdb/cards/GO_G_PROTEIN_COUPLED_PURINERGIC_RECEPTOR_SIGNALING_PATHWAY	7	0	1	1
iPSC-CVPC	Heart	c5.bp	GO_RESPONSE_TO_NITROGEN_COMPOUND	http://www.gsea-msigdb.org/gsea/msigdb/cards/GO_RESPONSE_TO_NITROGEN_COMPOUND	602	1.27095228304623	0.243598971176128	1
iPSC-CVPC	Arteria	c5.bp	GO_RESPONSE_TO_NITROGEN_COMPOUND	http://www.gsea-msigdb.org/gsea/msigdb/cards/GO_RESPONSE_TO_NITROGEN_COMPOUND	602	1.34709558863984	0.079500530078654	1
Heart	Arteria	c5.bp	GO_SULFUR_COMPOUND_METABOLIC_PROCESS	http://www.gsea-msigdb.org/gsea/msigdb/cards/GO_SULFUR_COMPOUND_METABOLIC_PROCESS	220	0.921891393347586	1	1
iPSC-CVPC	Heart	c5.bp	GO_NEGATIVE_REGULATION_OF_TRANSCRIPTION_REGULATORY_REGION_DNA_BINDING	http://www.gsea-msigdb.org/gsea/msigdb/cards/GO_NEGATIVE_REGULATION_OF_TRANSCRIPTION_REGULATORY_REGION_DNA_BINDING	10	3.21625307367113	0.28848373142765	1
iPSC-CVPC	Arteria	c5.bp	GO_NEGATIVE_REGULATION_OF_TRANSCRIPTION_REGULATORY_REGION_DNA_BINDING	http://www.gsea-msigdb.org/gsea/msigdb/cards/GO_NEGATIVE_REGULATION_OF_TRANSCRIPTION_REGULATORY_REGION_DNA_BINDING	10	0	1	1
iPSC-CVPC	Heart	c5.bp	GO_POSITIVE_REGULATION_OF_METANEPHROS_DEVELOPMENT	http://www.gsea-msigdb.org/gsea/msigdb/cards/GO_POSITIVE_REGULATION_OF_METANEPHROS_DEVELOPMENT	7	0	1	1
iPSC-CVPC	Arteria	c5.bp	GO_POSITIVE_REGULATION_OF_METANEPHROS_DEVELOPMENT	http://www.gsea-msigdb.org/gsea/msigdb/cards/GO_POSITIVE_REGULATION_OF_METANEPHROS_DEVELOPMENT	7	0	1	1
iPSC-CVPC	Heart	c5.bp	GO_POSITIVE_REGULATION_OF_LYMPHOCYTE_APOPTOTIC_PROCESS	http://www.gsea-msigdb.org/gsea/msigdb/cards/GO_POSITIVE_REGULATION_OF_LYMPHOCYTE_APOPTOTIC_PROCESS	10	0	1	1
iPSC-CVPC	Arteria	c5.bp	GO_POSITIVE_REGULATION_OF_LYMPHOCYTE_APOPTOTIC_PROCESS	http://www.gsea-msigdb.org/gsea/msigdb/cards/GO_POSITIVE_REGULATION_OF_LYMPHOCYTE_APOPTOTIC_PROCESS	10	0	1	1
Heart	Arteria	c5.bp	GO_POSITIVE_REGULATION_OF_LYMPHOCYTE_APOPTOTIC_PROCESS	http://www.gsea-msigdb.org/gsea/msigdb/cards/GO_POSITIVE_REGULATION_OF_LYMPHOCYTE_APOPTOTIC_PROCESS	10	0	1	1
Heart	Arteria	c5.bp	GO_POSITIVE_REGULATION_OF_GENE_EXPRESSION_EPIGENETIC	http://www.gsea-msigdb.org/gsea/msigdb/cards/GO_POSITIVE_REGULATION_OF_GENE_EXPRESSION_EPIGENETIC	35	0	1	1
iPSC-CVPC	Arteria	c5.bp	GO_REGULATION_OF_VESICLE_FUSION	http://www.gsea-msigdb.org/gsea/msigdb/cards/GO_REGULATION_OF_VESICLE_FUSION	24	0.746635419487616	1	1
iPSC-CVPC	Heart	c5.bp	GO_EPITHELIUM_DEVELOPMENT	http://www.gsea-msigdb.org/gsea/msigdb/cards/GO_EPITHELIUM_DEVELOPMENT	602	0.884838627848474	0.726064678081071	1
Heart	Arteria	c5.bp	GO_EPITHELIUM_DEVELOPMENT	http://www.gsea-msigdb.org/gsea/msigdb/cards/GO_EPITHELIUM_DEVELOPMENT	602	0.835100325388661	1	1
iPSC-CVPC	Heart	c5.bp	GO_INTRINSIC_APOPTOTIC_SIGNALING_PATHWAY_IN_RESPONSE_TO_DNA_DAMAGE_BY_P53_CLASS_MEDIATOR	http://www.gsea-msigdb.org/gsea/msigdb/cards/GO_INTRINSIC_APOPTOTIC_SIGNALING_PATHWAY_IN_RESPONSE_TO_DNA_DAMAGE_BY_P53_CLASS_MEDIATOR	32	0.931955759651939	1	1
iPSC-CVPC	Arteria	c5.bp	GO_INTRINSIC_APOPTOTIC_SIGNALING_PATHWAY_IN_RESPONSE_TO_DNA_DAMAGE_BY_P53_CLASS_MEDIATOR	http://www.gsea-msigdb.org/gsea/msigdb/cards/GO_INTRINSIC_APOPTOTIC_SIGNALING_PATHWAY_IN_RESPONSE_TO_DNA_DAMAGE_BY_P53_CLASS_MEDIATOR	32	1.14596644566813	0.695163098811092	1
iPSC-CVPC	Heart	c5.bp	GO_PHOSPHOLIPID_METABOLIC_PROCESS	http://www.gsea-msigdb.org/gsea/msigdb/cards/GO_PHOSPHOLIPID_METABOLIC_PROCESS	279	1.07631682884137	0.736345566186235	1
iPSC-CVPC	Arteria	c5.bp	GO_PHOSPHOLIPID_METABOLIC_PROCESS	http://www.gsea-msigdb.org/gsea/msigdb/cards/GO_PHOSPHOLIPID_METABOLIC_PROCESS	279	0.975645683021158	1	1
iPSC-CVPC	Heart	c5.bp	GO_AMMONIUM_ION_METABOLIC_PROCESS	http://www.gsea-msigdb.org/gsea/msigdb/cards/GO_AMMONIUM_ION_METABOLIC_PROCESS	113	1.06112724761856	0.791644127316826	1
iPSC-CVPC	Arteria	c5.bp	GO_AMMONIUM_ION_METABOLIC_PROCESS	http://www.gsea-msigdb.org/gsea/msigdb/cards/GO_AMMONIUM_ION_METABOLIC_PROCESS	113	0.628016032397194	0.530300802610109	1
iPSC-CVPC	Heart	c5.bp	GO_GLUTAMINE_FAMILY_AMINO_ACID_BIOSYNTHETIC_PROCESS	http://www.gsea-msigdb.org/gsea/msigdb/cards/GO_GLUTAMINE_FAMILY_AMINO_ACID_BIOSYNTHETIC_PROCESS	8	4.13576608214195	0.238343513900963	1
iPSC-CVPC	Arteria	c5.bp	GO_GLUTAMINE_FAMILY_AMINO_ACID_BIOSYNTHETIC_PROCESS	http://www.gsea-msigdb.org/gsea/msigdb/cards/GO_GLUTAMINE_FAMILY_AMINO_ACID_BIOSYNTHETIC_PROCESS	8	0	1	1
iPSC-CVPC	Heart	c5.bp	GO_BODY_MORPHOGENESIS	http://www.gsea-msigdb.org/gsea/msigdb/cards/GO_BODY_MORPHOGENESIS	30	0	0.62534481433129	1
Heart	Arteria	c5.bp	GO_SOMATIC_STEM_CELL_POPULATION_MAINTENANCE	http://www.gsea-msigdb.org/gsea/msigdb/cards/GO_SOMATIC_STEM_CELL_POPULATION_MAINTENANCE	32	0	1	1
Heart	Arteria	c5.bp	GO_POSITIVE_REGULATION_OF_DNA_DAMAGE_RESPONSE_SIGNAL_TRANSDUCTION_BY_P53_CLASS_MEDIATOR	http://www.gsea-msigdb.org/gsea/msigdb/cards/GO_POSITIVE_REGULATION_OF_DNA_DAMAGE_RESPONSE_SIGNAL_TRANSDUCTION_BY_P53_CLASS_MEDIATOR	8	0	1	1
iPSC-CVPC	Arteria	c5.bp	GO_REGULATION_OF_COLLATERAL_SPROUTING	http://www.gsea-msigdb.org/gsea/msigdb/cards/GO_REGULATION_OF_COLLATERAL_SPROUTING	10	1.91058868467145	0.432170553786081	1
Heart	Arteria	c5.bp	GO_REGULATION_OF_COLLATERAL_SPROUTING	http://www.gsea-msigdb.org/gsea/msigdb/cards/GO_REGULATION_OF_COLLATERAL_SPROUTING	10	0	1	1
iPSC-CVPC	Arteria	c5.bp	GO_PINOCYTOSIS	http://www.gsea-msigdb.org/gsea/msigdb/cards/GO_PINOCYTOSIS	14	1.32222215691555	0.547270630631346	1
iPSC-CVPC	Heart	c5.bp	GO_LUNG_EPITHELIUM_DEVELOPMENT	http://www.gsea-msigdb.org/gsea/msigdb/cards/GO_LUNG_EPITHELIUM_DEVELOPMENT	22	1.37700733198433	0.527262127022268	1
iPSC-CVPC	Arteria	c5.bp	GO_LUNG_EPITHELIUM_DEVELOPMENT	http://www.gsea-msigdb.org/gsea/msigdb/cards/GO_LUNG_EPITHELIUM_DEVELOPMENT	22	0.817903741612932	1	1
iPSC-CVPC	Arteria	c5.bp	GO_METENCEPHALON_DEVELOPMENT	http://www.gsea-msigdb.org/gsea/msigdb/cards/GO_METENCEPHALON_DEVELOPMENT	61	0.888174562732361	1	1
iPSC-CVPC	Arteria	c5.bp	GO_G_PROTEIN_COUPLED_PURINERGIC_NUCLEOTIDE_RECEPTOR_SIGNALING_PATHWAY	http://www.gsea-msigdb.org/gsea/msigdb/cards/GO_G_PROTEIN_COUPLED_PURINERGIC_NUCLEOTIDE_RECEPTOR_SIGNALING_PATHWAY	3	0	1	1
Heart	Arteria	c5.bp	GO_G_PROTEIN_COUPLED_PURINERGIC_NUCLEOTIDE_RECEPTOR_SIGNALING_PATHWAY	http://www.gsea-msigdb.org/gsea/msigdb/cards/GO_G_PROTEIN_COUPLED_PURINERGIC_NUCLEOTIDE_RECEPTOR_SIGNALING_PATHWAY	3	0	1	1
iPSC-CVPC	Arteria	c5.bp	GO_NATURAL_KILLER_CELL_DIFFERENTIATION	http://www.gsea-msigdb.org/gsea/msigdb/cards/GO_NATURAL_KILLER_CELL_DIFFERENTIATION	12	0	1	1
Heart	Arteria	c5.bp	GO_REGULATION_OF_INFLAMMATORY_RESPONSE_TO_ANTIGENIC_STIMULUS	http://www.gsea-msigdb.org/gsea/msigdb/cards/GO_REGULATION_OF_INFLAMMATORY_RESPONSE_TO_ANTIGENIC_STIMULUS	9	0	1	1
iPSC-CVPC	Heart	c5.bp	GO_NEGATIVE_REGULATION_OF_PROTEIN_AUTOPHOSPHORYLATION	http://www.gsea-msigdb.org/gsea/msigdb/cards/GO_NEGATIVE_REGULATION_OF_PROTEIN_AUTOPHOSPHORYLATION	8	0	1	1
iPSC-CVPC	Arteria	c5.bp	GO_NEGATIVE_REGULATION_OF_PROTEIN_AUTOPHOSPHORYLATION	http://www.gsea-msigdb.org/gsea/msigdb/cards/GO_NEGATIVE_REGULATION_OF_PROTEIN_AUTOPHOSPHORYLATION	8	0	1	1
Heart	Arteria	c5.bp	GO_NEGATIVE_REGULATION_OF_PROTEIN_AUTOPHOSPHORYLATION	http://www.gsea-msigdb.org/gsea/msigdb/cards/GO_NEGATIVE_REGULATION_OF_PROTEIN_AUTOPHOSPHORYLATION	8	0	1	1
iPSC-CVPC	Arteria	c5.bp	GO_ACID_SECRETION	http://www.gsea-msigdb.org/gsea/msigdb/cards/GO_ACID_SECRETION	50	0.714968179092793	1	1
Heart	Arteria	c5.bp	GO_ACID_SECRETION	http://www.gsea-msigdb.org/gsea/msigdb/cards/GO_ACID_SECRETION	50	0	1	1
Heart	Arteria	c5.bp	GO_POSITIVE_REGULATION_OF_ADAPTIVE_IMMUNE_RESPONSE	http://www.gsea-msigdb.org/gsea/msigdb/cards/GO_POSITIVE_REGULATION_OF_ADAPTIVE_IMMUNE_RESPONSE	51	0	1	1
iPSC-CVPC	Arteria	c5.bp	GO_REGULATION_OF_PROTEIN_BINDING	http://www.gsea-msigdb.org/gsea/msigdb/cards/GO_REGULATION_OF_PROTEIN_BINDING	149	1.51546806128676	0.200275665035127	1
Heart	Arteria	c5.bp	GO_REGULATION_OF_PROTEIN_BINDING	http://www.gsea-msigdb.org/gsea/msigdb/cards/GO_REGULATION_OF_PROTEIN_BINDING	149	1.37645712097226	0.659398841527719	1
iPSC-CVPC	Arteria	c5.bp	GO_REGULATION_OF_HISTONE_METHYLATION	http://www.gsea-msigdb.org/gsea/msigdb/cards/GO_REGULATION_OF_HISTONE_METHYLATION	42	0.858641085114005	1	1
Heart	Arteria	c5.bp	GO_REGULATION_OF_HISTONE_METHYLATION	http://www.gsea-msigdb.org/gsea/msigdb/cards/GO_REGULATION_OF_HISTONE_METHYLATION	42	2.46847361077471	0.340347225599363	1
iPSC-CVPC	Heart	c5.bp	GO_RESPONSE_TO_ZINC_ION	http://www.gsea-msigdb.org/gsea/msigdb/cards/GO_RESPONSE_TO_ZINC_ION	26	0	1	1
iPSC-CVPC	Arteria	c5.bp	GO_RESPONSE_TO_ZINC_ION	http://www.gsea-msigdb.org/gsea/msigdb/cards/GO_RESPONSE_TO_ZINC_ION	26	1.43325964912756	0.652109004375886	1
iPSC-CVPC	Heart	c5.bp	GO_CELL_PART_MORPHOGENESIS	http://www.gsea-msigdb.org/gsea/msigdb/cards/GO_CELL_PART_MORPHOGENESIS	412	1.17537006184947	0.485577866950102	1
Heart	Arteria	c5.bp	GO_PIGMENT_GRANULE_LOCALIZATION	http://www.gsea-msigdb.org/gsea/msigdb/cards/GO_PIGMENT_GRANULE_LOCALIZATION	15	0	1	1
iPSC-CVPC	Heart	c5.bp	GO_VASCULAR_ENDOTHELIAL_GROWTH_FACTOR_SIGNALING_PATHWAY	http://www.gsea-msigdb.org/gsea/msigdb/cards/GO_VASCULAR_ENDOTHELIAL_GROWTH_FACTOR_SIGNALING_PATHWAY	23	1.3143110612457	0.543107345372945	1
iPSC-CVPC	Arteria	c5.bp	GO_VASCULAR_ENDOTHELIAL_GROWTH_FACTOR_SIGNALING_PATHWAY	http://www.gsea-msigdb.org/gsea/msigdb/cards/GO_VASCULAR_ENDOTHELIAL_GROWTH_FACTOR_SIGNALING_PATHWAY	23	0	0.635294981278317	1
iPSC-CVPC	Heart	c5.bp	GO_GLAND_MORPHOGENESIS	http://www.gsea-msigdb.org/gsea/msigdb/cards/GO_GLAND_MORPHOGENESIS	71	1.27713365049167	0.5142836878381	1
iPSC-CVPC	Arteria	c5.bp	GO_GLAND_MORPHOGENESIS	http://www.gsea-msigdb.org/gsea/msigdb/cards/GO_GLAND_MORPHOGENESIS	71	0.496330885724686	0.437938019287832	1
iPSC-CVPC	Heart	c5.bp	GO_REGULATION_OF_SYSTEMIC_ARTERIAL_BLOOD_PRESSURE_BY_CIRCULATORY_RENIN_ANGIOTENSIN	http://www.gsea-msigdb.org/gsea/msigdb/cards/GO_REGULATION_OF_SYSTEMIC_ARTERIAL_BLOOD_PRESSURE_BY_CIRCULATORY_RENIN_ANGIOTENSIN	9	0	1	1
iPSC-CVPC	Arteria	c5.bp	GO_REGULATION_OF_SYSTEMIC_ARTERIAL_BLOOD_PRESSURE_BY_CIRCULATORY_RENIN_ANGIOTENSIN	http://www.gsea-msigdb.org/gsea/msigdb/cards/GO_REGULATION_OF_SYSTEMIC_ARTERIAL_BLOOD_PRESSURE_BY_CIRCULATORY_RENIN_ANGIOTENSIN	9	0	1	1
iPSC-CVPC	Heart	c5.bp	GO_IRE1_MEDIATED_UNFOLDED_PROTEIN_RESPONSE	http://www.gsea-msigdb.org/gsea/msigdb/cards/GO_IRE1_MEDIATED_UNFOLDED_PROTEIN_RESPONSE	43	0.687150288314927	1	1
iPSC-CVPC	Heart	c5.bp	GO_PHENOL_CONTAINING_COMPOUND_BIOSYNTHETIC_PROCESS	http://www.gsea-msigdb.org/gsea/msigdb/cards/GO_PHENOL_CONTAINING_COMPOUND_BIOSYNTHETIC_PROCESS	14	0	1	1
iPSC-CVPC	Arteria	c5.bp	GO_PHENOL_CONTAINING_COMPOUND_BIOSYNTHETIC_PROCESS	http://www.gsea-msigdb.org/gsea/msigdb/cards/GO_PHENOL_CONTAINING_COMPOUND_BIOSYNTHETIC_PROCESS	14	1.32222215691555	0.547270630631346	1
iPSC-CVPC	Heart	c5.bp	GO_DENDRITIC_CELL_MIGRATION	http://www.gsea-msigdb.org/gsea/msigdb/cards/GO_DENDRITIC_CELL_MIGRATION	13	0	1	1
iPSC-CVPC	Arteria	c5.bp	GO_DENDRITIC_CELL_MIGRATION	http://www.gsea-msigdb.org/gsea/msigdb/cards/GO_DENDRITIC_CELL_MIGRATION	13	1.4325200938926	0.520888009781609	1
iPSC-CVPC	Arteria	c5.bp	GO_OUTFLOW_TRACT_SEPTUM_MORPHOGENESIS	http://www.gsea-msigdb.org/gsea/msigdb/cards/GO_OUTFLOW_TRACT_SEPTUM_MORPHOGENESIS	22	0	0.630841230277534	1
Heart	Arteria	c5.bp	GO_OUTFLOW_TRACT_SEPTUM_MORPHOGENESIS	http://www.gsea-msigdb.org/gsea/msigdb/cards/GO_OUTFLOW_TRACT_SEPTUM_MORPHOGENESIS	22	0	1	1
iPSC-CVPC	Heart	c5.bp	GO_RESPONSE_TO_ELECTRICAL_STIMULUS	http://www.gsea-msigdb.org/gsea/msigdb/cards/GO_RESPONSE_TO_ELECTRICAL_STIMULUS	24	1.25705143606399	0.558422901964669	1
iPSC-CVPC	Heart	c5.bp	GO_NEGATIVE_REGULATION_OF_TELOMERE_MAINTENANCE_VIA_TELOMERASE	http://www.gsea-msigdb.org/gsea/msigdb/cards/GO_NEGATIVE_REGULATION_OF_TELOMERE_MAINTENANCE_VIA_TELOMERASE	18	1.70163520480477	0.458209802682747	1
iPSC-CVPC	Arteria	c5.bp	GO_NEGATIVE_REGULATION_OF_TELOMERE_MAINTENANCE_VIA_TELOMERASE	http://www.gsea-msigdb.org/gsea/msigdb/cards/GO_NEGATIVE_REGULATION_OF_TELOMERE_MAINTENANCE_VIA_TELOMERASE	18	0	0.621256050943545	1
Heart	Arteria	c5.bp	GO_NEGATIVE_REGULATION_OF_TELOMERE_MAINTENANCE_VIA_TELOMERASE	http://www.gsea-msigdb.org/gsea/msigdb/cards/GO_NEGATIVE_REGULATION_OF_TELOMERE_MAINTENANCE_VIA_TELOMERASE	18	5.96504117910471	0.16314273897928	1
iPSC-CVPC	Arteria	c5.bp	GO_REGULATION_OF_ERBB_SIGNALING_PATHWAY	http://www.gsea-msigdb.org/gsea/msigdb/cards/GO_REGULATION_OF_ERBB_SIGNALING_PATHWAY	62	1.18623246493225	0.775949380137973	1
Heart	Arteria	c5.bp	GO_REGULATION_OF_ERBB_SIGNALING_PATHWAY	http://www.gsea-msigdb.org/gsea/msigdb/cards/GO_REGULATION_OF_ERBB_SIGNALING_PATHWAY	62	0	1	1
iPSC-CVPC	Heart	c5.bp	GO_POSITIVE_REGULATION_OF_ENDOTHELIAL_CELL_CHEMOTAXIS	http://www.gsea-msigdb.org/gsea/msigdb/cards/GO_POSITIVE_REGULATION_OF_ENDOTHELIAL_CELL_CHEMOTAXIS	9	0	1	1
iPSC-CVPC	Heart	c5.bp	GO_NEGATIVE_REGULATION_OF_SMOOTH_MUSCLE_CELL_PROLIFERATION	http://www.gsea-msigdb.org/gsea/msigdb/cards/GO_NEGATIVE_REGULATION_OF_SMOOTH_MUSCLE_CELL_PROLIFERATION	30	0.996416451856083	1	1
iPSC-CVPC	Arteria	c5.bp	GO_NEGATIVE_REGULATION_OF_SMOOTH_MUSCLE_CELL_PROLIFERATION	http://www.gsea-msigdb.org/gsea/msigdb/cards/GO_NEGATIVE_REGULATION_OF_SMOOTH_MUSCLE_CELL_PROLIFERATION	30	0.591808830738426	1	1
iPSC-CVPC	Heart	c5.bp	GO_REGULATION_OF_MAPK_CASCADE	http://www.gsea-msigdb.org/gsea/msigdb/cards/GO_REGULATION_OF_MAPK_CASCADE	399	0.892400812308837	0.886683922120375	1
iPSC-CVPC	Arteria	c5.bp	GO_REGULATION_OF_MAPK_CASCADE	http://www.gsea-msigdb.org/gsea/msigdb/cards/GO_REGULATION_OF_MAPK_CASCADE	399	0.662611776254715	0.1443345497951	1
iPSC-CVPC	Heart	c5.bp	GO_MYELOID_LEUKOCYTE_MIGRATION	http://www.gsea-msigdb.org/gsea/msigdb/cards/GO_MYELOID_LEUKOCYTE_MIGRATION	102	0.575568539842664	0.777717299677881	1
iPSC-CVPC	Arteria	c5.bp	GO_MYELOID_LEUKOCYTE_MIGRATION	http://www.gsea-msigdb.org/gsea/msigdb/cards/GO_MYELOID_LEUKOCYTE_MIGRATION	102	0.341423698977875	0.128632915017864	1
iPSC-CVPC	Heart	c5.bp	GO_COLLAGEN_FIBRIL_ORGANIZATION	http://www.gsea-msigdb.org/gsea/msigdb/cards/GO_COLLAGEN_FIBRIL_ORGANIZATION	35	0.849482549548683	1	1
iPSC-CVPC	Arteria	c5.bp	GO_COLLAGEN_FIBRIL_ORGANIZATION	http://www.gsea-msigdb.org/gsea/msigdb/cards/GO_COLLAGEN_FIBRIL_ORGANIZATION	35	2.22508347957981	0.123885459377282	1
iPSC-CVPC	Heart	c5.bp	GO_RESPONSE_TO_ESTRADIOL	http://www.gsea-msigdb.org/gsea/msigdb/cards/GO_RESPONSE_TO_ESTRADIOL	73	2.14044292075043	0.097040345473668	1
iPSC-CVPC	Arteria	c5.bp	GO_RESPONSE_TO_ESTRADIOL	http://www.gsea-msigdb.org/gsea/msigdb/cards/GO_RESPONSE_TO_ESTRADIOL	73	1.26563339403524	0.60076735646274	1
iPSC-CVPC	Heart	c5.bp	GO_NEURON_PROJECTION_EXTENSION	http://www.gsea-msigdb.org/gsea/msigdb/cards/GO_NEURON_PROJECTION_EXTENSION	114	0.779140781644473	1	1
iPSC-CVPC	Arteria	c5.bp	GO_NEURON_PROJECTION_EXTENSION	http://www.gsea-msigdb.org/gsea/msigdb/cards/GO_NEURON_PROJECTION_EXTENSION	114	1.4800461368467	0.295463965737741	1
Heart	Arteria	c5.bp	GO_NEURON_PROJECTION_EXTENSION	http://www.gsea-msigdb.org/gsea/msigdb/cards/GO_NEURON_PROJECTION_EXTENSION	114	1.81252506399005	0.309277946775332	1
iPSC-CVPC	Heart	c5.bp	GO_RESPONSE_TO_MUSCLE_STRETCH	http://www.gsea-msigdb.org/gsea/msigdb/cards/GO_RESPONSE_TO_MUSCLE_STRETCH	12	2.6311276912316	0.335331830253007	1
iPSC-CVPC	Arteria	c5.bp	GO_RESPONSE_TO_MUSCLE_STRETCH	http://www.gsea-msigdb.org/gsea/msigdb/cards/GO_RESPONSE_TO_MUSCLE_STRETCH	12	1.56288361152648	0.492970723871524	1
Heart	Arteria	c5.bp	GO_RESPONSE_TO_MUSCLE_STRETCH	http://www.gsea-msigdb.org/gsea/msigdb/cards/GO_RESPONSE_TO_MUSCLE_STRETCH	12	9.22173853809305	0.111926645794903	1
Heart	Arteria	c5.bp	GO_NEGATIVE_REGULATION_OF_OLIGODENDROCYTE_DIFFERENTIATION	http://www.gsea-msigdb.org/gsea/msigdb/cards/GO_NEGATIVE_REGULATION_OF_OLIGODENDROCYTE_DIFFERENTIATION	7	0	1	1
Heart	Arteria	c5.bp	GO_CIRCULATORY_SYSTEM_PROCESS	http://www.gsea-msigdb.org/gsea/msigdb/cards/GO_CIRCULATORY_SYSTEM_PROCESS	294	2.16308218142561	0.0697288564558773	1
iPSC-CVPC	Arteria	c5.bp	GO_RIBONUCLEOTIDE_CATABOLIC_PROCESS	http://www.gsea-msigdb.org/gsea/msigdb/cards/GO_RIBONUCLEOTIDE_CATABOLIC_PROCESS	24	0.746635419487616	1	1
iPSC-CVPC	Heart	c5.bp	GO_NEGATIVE_REGULATION_OF_INTERLEUKIN_1_PRODUCTION	http://www.gsea-msigdb.org/gsea/msigdb/cards/GO_NEGATIVE_REGULATION_OF_INTERLEUKIN_1_PRODUCTION	18	0	1	1
Heart	Arteria	c5.bp	GO_NEGATIVE_REGULATION_OF_INTERLEUKIN_1_PRODUCTION	http://www.gsea-msigdb.org/gsea/msigdb/cards/GO_NEGATIVE_REGULATION_OF_INTERLEUKIN_1_PRODUCTION	18	0	1	1
iPSC-CVPC	Heart	c5.bp	GO_POSITIVE_REGULATION_OF_CATION_CHANNEL_ACTIVITY	http://www.gsea-msigdb.org/gsea/msigdb/cards/GO_POSITIVE_REGULATION_OF_CATION_CHANNEL_ACTIVITY	34	1.81037959861125	0.315477871823696	1
iPSC-CVPC	Arteria	c5.bp	GO_REGULATION_OF_PODOSOME_ASSEMBLY	http://www.gsea-msigdb.org/gsea/msigdb/cards/GO_REGULATION_OF_PODOSOME_ASSEMBLY	7	0	1	1
iPSC-CVPC	Heart	c5.bp	GO_CARDIAC_LEFT_VENTRICLE_MORPHOGENESIS	http://www.gsea-msigdb.org/gsea/msigdb/cards/GO_CARDIAC_LEFT_VENTRICLE_MORPHOGENESIS	8	4.13576608214195	0.238343513900963	1
iPSC-CVPC	Arteria	c5.bp	GO_CARDIAC_LEFT_VENTRICLE_MORPHOGENESIS	http://www.gsea-msigdb.org/gsea/msigdb/cards/GO_CARDIAC_LEFT_VENTRICLE_MORPHOGENESIS	8	0	1	1
Heart	Arteria	c5.bp	GO_CARDIAC_LEFT_VENTRICLE_MORPHOGENESIS	http://www.gsea-msigdb.org/gsea/msigdb/cards/GO_CARDIAC_LEFT_VENTRICLE_MORPHOGENESIS	8	0	1	1
iPSC-CVPC	Heart	c5.bp	GO_REGULATION_OF_DNA_DEPENDENT_DNA_REPLICATION	http://www.gsea-msigdb.org/gsea/msigdb/cards/GO_REGULATION_OF_DNA_DEPENDENT_DNA_REPLICATION	36	0.825133033539165	1	1
iPSC-CVPC	Arteria	c5.bp	GO_REGULATION_OF_DNA_DEPENDENT_DNA_REPLICATION	http://www.gsea-msigdb.org/gsea/msigdb/cards/GO_REGULATION_OF_DNA_DEPENDENT_DNA_REPLICATION	36	0.490065013572197	0.721074964082952	1
iPSC-CVPC	Heart	c5.bp	GO_PROTEIN_HOMOTETRAMERIZATION	http://www.gsea-msigdb.org/gsea/msigdb/cards/GO_PROTEIN_HOMOTETRAMERIZATION	51	1.18043278005896	0.68846850377472	1
iPSC-CVPC	Arteria	c5.bp	GO_PROTEIN_HOMOTETRAMERIZATION	http://www.gsea-msigdb.org/gsea/msigdb/cards/GO_PROTEIN_HOMOTETRAMERIZATION	51	0.700307469931235	1	1
iPSC-CVPC	Heart	c5.bp	GO_PROSTATE_GLAND_MORPHOGENESIS	http://www.gsea-msigdb.org/gsea/msigdb/cards/GO_PROSTATE_GLAND_MORPHOGENESIS	14	4.83652153478667	0.077905570291198	1
iPSC-CVPC	Arteria	c5.bp	GO_PROSTATE_GLAND_MORPHOGENESIS	http://www.gsea-msigdb.org/gsea/msigdb/cards/GO_PROSTATE_GLAND_MORPHOGENESIS	14	0	1	1
Heart	Arteria	c5.bp	GO_REGULATION_OF_STRESS_ACTIVATED_PROTEIN_KINASE_SIGNALING_CASCADE	http://www.gsea-msigdb.org/gsea/msigdb/cards/GO_REGULATION_OF_STRESS_ACTIVATED_PROTEIN_KINASE_SIGNALING_CASCADE	135	1.52336236127429	0.38439094604868	1
iPSC-CVPC	Heart	c5.bp	GO_MYELOID_CELL_DEVELOPMENT	http://www.gsea-msigdb.org/gsea/msigdb/cards/GO_MYELOID_CELL_DEVELOPMENT	44	1.37806967382688	0.658822768357992	1
iPSC-CVPC	Arteria	c5.bp	GO_MYELOID_CELL_DEVELOPMENT	http://www.gsea-msigdb.org/gsea/msigdb/cards/GO_MYELOID_CELL_DEVELOPMENT	44	2.21289032205286	0.0922174909593238	1
iPSC-CVPC	Arteria	c5.bp	GO_NEGATIVE_REGULATION_OF_CELL_DIVISION	http://www.gsea-msigdb.org/gsea/msigdb/cards/GO_NEGATIVE_REGULATION_OF_CELL_DIVISION	11	1.71933654701835	0.463429663316942	1
iPSC-CVPC	Heart	c5.bp	GO_CELLULAR_RESPONSE_TO_UV	http://www.gsea-msigdb.org/gsea/msigdb/cards/GO_CELLULAR_RESPONSE_TO_UV	61	0.979424165370832	1	1
iPSC-CVPC	Arteria	c5.bp	GO_CELLULAR_RESPONSE_TO_UV	http://www.gsea-msigdb.org/gsea/msigdb/cards/GO_CELLULAR_RESPONSE_TO_UV	61	0.888174562732361	1	1
iPSC-CVPC	Heart	c5.bp	GO_POSITIVE_REGULATION_OF_EPITHELIAL_TO_MESENCHYMAL_TRANSITION	http://www.gsea-msigdb.org/gsea/msigdb/cards/GO_POSITIVE_REGULATION_OF_EPITHELIAL_TO_MESENCHYMAL_TRANSITION	34	0	0.629421988680078	1
iPSC-CVPC	Arteria	c5.bp	GO_POSITIVE_REGULATION_OF_EPITHELIAL_TO_MESENCHYMAL_TRANSITION	http://www.gsea-msigdb.org/gsea/msigdb/cards/GO_POSITIVE_REGULATION_OF_EPITHELIAL_TO_MESENCHYMAL_TRANSITION	34	0	0.260081723037525	1
iPSC-CVPC	Heart	c5.bp	GO_RESPONSE_TO_STEROID_HORMONE	http://www.gsea-msigdb.org/gsea/msigdb/cards/GO_RESPONSE_TO_STEROID_HORMONE	207	1.01160032653123	0.846408326528034	1
iPSC-CVPC	Arteria	c5.bp	GO_RESPONSE_TO_STEROID_HORMONE	http://www.gsea-msigdb.org/gsea/msigdb/cards/GO_RESPONSE_TO_STEROID_HORMONE	207	0.963633145260155	1	1
iPSC-CVPC	Heart	c5.bp	GO_POSITIVE_REGULATION_OF_RNA_SPLICING	http://www.gsea-msigdb.org/gsea/msigdb/cards/GO_POSITIVE_REGULATION_OF_RNA_SPLICING	23	4.36150797141296	0.0400420560506033	1
iPSC-CVPC	Arteria	c5.bp	GO_POSITIVE_REGULATION_OF_RNA_SPLICING	http://www.gsea-msigdb.org/gsea/msigdb/cards/GO_POSITIVE_REGULATION_OF_RNA_SPLICING	23	1.63847645086098	0.363434281447563	1
Heart	Arteria	c5.bp	GO_POSITIVE_REGULATION_OF_RNA_SPLICING	http://www.gsea-msigdb.org/gsea/msigdb/cards/GO_POSITIVE_REGULATION_OF_RNA_SPLICING	23	0	1	1
iPSC-CVPC	Heart	c5.bp	GO_POSITIVE_REGULATION_OF_KERATINOCYTE_DIFFERENTIATION	http://www.gsea-msigdb.org/gsea/msigdb/cards/GO_POSITIVE_REGULATION_OF_KERATINOCYTE_DIFFERENTIATION	8	0	1	1
iPSC-CVPC	Arteria	c5.bp	GO_POSITIVE_REGULATION_OF_KERATINOCYTE_DIFFERENTIATION	http://www.gsea-msigdb.org/gsea/msigdb/cards/GO_POSITIVE_REGULATION_OF_KERATINOCYTE_DIFFERENTIATION	8	2.45677597834622	0.36409345665046	1
iPSC-CVPC	Heart	c5.bp	GO_CARDIAC_CHAMBER_MORPHOGENESIS	http://www.gsea-msigdb.org/gsea/msigdb/cards/GO_CARDIAC_CHAMBER_MORPHOGENESIS	78	0.373545040648334	0.523418234120774	1
iPSC-CVPC	Arteria	c5.bp	GO_CARDIAC_CHAMBER_MORPHOGENESIS	http://www.gsea-msigdb.org/gsea/msigdb/cards/GO_CARDIAC_CHAMBER_MORPHOGENESIS	78	0.450316394916156	0.447231966705454	1
iPSC-CVPC	Arteria	c5.bp	GO_EMBRYONIC_AXIS_SPECIFICATION	http://www.gsea-msigdb.org/gsea/msigdb/cards/GO_EMBRYONIC_AXIS_SPECIFICATION	18	0	0.621256050943545	1
iPSC-CVPC	Heart	c5.bp	GO_CELLULAR_RESPONSE_TO_LIPID	http://www.gsea-msigdb.org/gsea/msigdb/cards/GO_CELLULAR_RESPONSE_TO_LIPID	325	0.914968910693123	1	1
iPSC-CVPC	Arteria	c5.bp	GO_CELLULAR_RESPONSE_TO_LIPID	http://www.gsea-msigdb.org/gsea/msigdb/cards/GO_CELLULAR_RESPONSE_TO_LIPID	325	0.886611532934771	0.804214579437712	1
Heart	Arteria	c5.bp	GO_CELLULAR_RESPONSE_TO_LIPID	http://www.gsea-msigdb.org/gsea/msigdb/cards/GO_CELLULAR_RESPONSE_TO_LIPID	325	0.615908115210816	0.773107654029432	1
iPSC-CVPC	Heart	c5.bp	GO_IRON_COORDINATION_ENTITY_TRANSPORT	http://www.gsea-msigdb.org/gsea/msigdb/cards/GO_IRON_COORDINATION_ENTITY_TRANSPORT	7	0	1	1
iPSC-CVPC	Arteria	c5.bp	GO_IRON_COORDINATION_ENTITY_TRANSPORT	http://www.gsea-msigdb.org/gsea/msigdb/cards/GO_IRON_COORDINATION_ENTITY_TRANSPORT	7	2.86643075245736	0.32705832013432	1
iPSC-CVPC	Arteria	c5.bp	GO_REGULATION_OF_EPIDERMIS_DEVELOPMENT	http://www.gsea-msigdb.org/gsea/msigdb/cards/GO_REGULATION_OF_EPIDERMIS_DEVELOPMENT	40	0.904010334555831	1	1
iPSC-CVPC	Arteria	c5.bp	GO_FORMATION_OF_PRIMARY_GERM_LAYER	http://www.gsea-msigdb.org/gsea/msigdb/cards/GO_FORMATION_OF_PRIMARY_GERM_LAYER	65	1.43549355230577	0.406341119693211	1
Heart	Arteria	c5.bp	GO_FORMATION_OF_PRIMARY_GERM_LAYER	http://www.gsea-msigdb.org/gsea/msigdb/cards/GO_FORMATION_OF_PRIMARY_GERM_LAYER	65	3.23709591658635	0.134068318577481	1
iPSC-CVPC	Arteria	c5.bp	GO_NEGATIVE_REGULATION_OF_MUSCLE_CELL_DIFFERENTIATION	http://www.gsea-msigdb.org/gsea/msigdb/cards/GO_NEGATIVE_REGULATION_OF_MUSCLE_CELL_DIFFERENTIATION	35	0	0.261518814484198	1
iPSC-CVPC	Heart	c5.bp	GO_EPITHELIAL_CELL_DEVELOPMENT	http://www.gsea-msigdb.org/gsea/msigdb/cards/GO_EPITHELIAL_CELL_DEVELOPMENT	105	1.45105323419827	0.403645763830449	1
iPSC-CVPC	Arteria	c5.bp	GO_EPITHELIAL_CELL_DEVELOPMENT	http://www.gsea-msigdb.org/gsea/msigdb/cards/GO_EPITHELIAL_CELL_DEVELOPMENT	105	1.04178762894568	0.829611542505379	1
Heart	Arteria	c5.bp	GO_ALPHA_AMINO_ACID_BIOSYNTHETIC_PROCESS	http://www.gsea-msigdb.org/gsea/msigdb/cards/GO_ALPHA_AMINO_ACID_BIOSYNTHETIC_PROCESS	42	2.46847361077471	0.340347225599363	1
iPSC-CVPC	Heart	c5.bp	GO_REGULATION_OF_MONOOXYGENASE_ACTIVITY	http://www.gsea-msigdb.org/gsea/msigdb/cards/GO_REGULATION_OF_MONOOXYGENASE_ACTIVITY	26	0	1	1
iPSC-CVPC	Arteria	c5.bp	GO_REGULATION_OF_MONOOXYGENASE_ACTIVITY	http://www.gsea-msigdb.org/gsea/msigdb/cards/GO_REGULATION_OF_MONOOXYGENASE_ACTIVITY	26	1.43325964912756	0.652109004375886	1
iPSC-CVPC	Heart	c5.bp	GO_NEGATIVE_REGULATION_OF_GLIOGENESIS	http://www.gsea-msigdb.org/gsea/msigdb/cards/GO_NEGATIVE_REGULATION_OF_GLIOGENESIS	19	3.41235575549228	0.13145768555833	1
iPSC-CVPC	Arteria	c5.bp	GO_NEGATIVE_REGULATION_OF_GLIOGENESIS	http://www.gsea-msigdb.org/gsea/msigdb/cards/GO_NEGATIVE_REGULATION_OF_GLIOGENESIS	19	0.954497488400478	1	1
iPSC-CVPC	Heart	c5.bp	GO_REGULATION_OF_ANTIGEN_PROCESSING_AND_PRESENTATION_OF_PEPTIDE_ANTIGEN	http://www.gsea-msigdb.org/gsea/msigdb/cards/GO_REGULATION_OF_ANTIGEN_PROCESSING_AND_PRESENTATION_OF_PEPTIDE_ANTIGEN	4	0	1	1
iPSC-CVPC	Heart	c5.bp	GO_REGULATION_OF_SYNAPTIC_TRANSMISSION_GLUTAMATERGIC	http://www.gsea-msigdb.org/gsea/msigdb/cards/GO_REGULATION_OF_SYNAPTIC_TRANSMISSION_GLUTAMATERGIC	24	2.63572214547714	0.190849543763297	1
iPSC-CVPC	Heart	c5.bp	GO_ACTIVATION_OF_PHOSPHOLIPASE_C_ACTIVITY	http://www.gsea-msigdb.org/gsea/msigdb/cards/GO_ACTIVATION_OF_PHOSPHOLIPASE_C_ACTIVITY	13	0	1	1
iPSC-CVPC	Arteria	c5.bp	GO_ACTIVATION_OF_PHOSPHOLIPASE_C_ACTIVITY	http://www.gsea-msigdb.org/gsea/msigdb/cards/GO_ACTIVATION_OF_PHOSPHOLIPASE_C_ACTIVITY	13	0	1	1
iPSC-CVPC	Arteria	c5.bp	GO_CELLULAR_RESPONSE_TO_EXTERNAL_STIMULUS	http://www.gsea-msigdb.org/gsea/msigdb/cards/GO_CELLULAR_RESPONSE_TO_EXTERNAL_STIMULUS	204	1.17329315636176	0.535019002493731	1
iPSC-CVPC	Heart	c5.bp	GO_POSITIVE_REGULATION_OF_MRNA_PROCESSING	http://www.gsea-msigdb.org/gsea/msigdb/cards/GO_POSITIVE_REGULATION_OF_MRNA_PROCESSING	17	3.86819843419597	0.109128181808335	1
iPSC-CVPC	Arteria	c5.bp	GO_POSITIVE_REGULATION_OF_MRNA_PROCESSING	http://www.gsea-msigdb.org/gsea/msigdb/cards/GO_POSITIVE_REGULATION_OF_MRNA_PROCESSING	17	2.29512503823533	0.239511670216042	1
iPSC-CVPC	Arteria	c5.bp	GO_DETECTION_OF_MECHANICAL_STIMULUS_INVOLVED_IN_SENSORY_PERCEPTION	http://www.gsea-msigdb.org/gsea/msigdb/cards/GO_DETECTION_OF_MECHANICAL_STIMULUS_INVOLVED_IN_SENSORY_PERCEPTION	10	0	1	1
Heart	Arteria	c5.bp	GO_DETECTION_OF_MECHANICAL_STIMULUS_INVOLVED_IN_SENSORY_PERCEPTION	http://www.gsea-msigdb.org/gsea/msigdb/cards/GO_DETECTION_OF_MECHANICAL_STIMULUS_INVOLVED_IN_SENSORY_PERCEPTION	10	0	1	1
iPSC-CVPC	Arteria	c5.bp	GO_FATTY_ACID_BETA_OXIDATION	http://www.gsea-msigdb.org/gsea/msigdb/cards/GO_FATTY_ACID_BETA_OXIDATION	51	1.46541341719718	0.363178488312094	1
iPSC-CVPC	Arteria	c5.bp	GO_NEGATIVE_REGULATION_OF_MUSCLE_CONTRACTION	http://www.gsea-msigdb.org/gsea/msigdb/cards/GO_NEGATIVE_REGULATION_OF_MUSCLE_CONTRACTION	16	1.14571734678302	0.595764171255043	1
Heart	Arteria	c5.bp	GO_RESPONSE_TO_CORTICOSTEROID	http://www.gsea-msigdb.org/gsea/msigdb/cards/GO_RESPONSE_TO_CORTICOSTEROID	66	0	1	1
iPSC-CVPC	Heart	c5.bp	GO_PROTEIN_MATURATION	http://www.gsea-msigdb.org/gsea/msigdb/cards/GO_PROTEIN_MATURATION	164	0.719278880350573	0.663641670847377	1
iPSC-CVPC	Arteria	c5.bp	GO_PROTEIN_MATURATION	http://www.gsea-msigdb.org/gsea/msigdb/cards/GO_PROTEIN_MATURATION	164	1.61832669349216	0.116107358089266	1
Heart	Arteria	c5.bp	GO_LOOP_OF_HENLE_DEVELOPMENT	http://www.gsea-msigdb.org/gsea/msigdb/cards/GO_LOOP_OF_HENLE_DEVELOPMENT	4	0	1	1
iPSC-CVPC	Heart	c5.bp	GO_KERATINOCYTE_PROLIFERATION	http://www.gsea-msigdb.org/gsea/msigdb/cards/GO_KERATINOCYTE_PROLIFERATION	21	3.05264390354102	0.154709771700777	1
iPSC-CVPC	Heart	c5.bp	GO_MALE_GENITALIA_DEVELOPMENT	http://www.gsea-msigdb.org/gsea/msigdb/cards/GO_MALE_GENITALIA_DEVELOPMENT	9	0	1	1
iPSC-CVPC	Arteria	c5.bp	GO_MALE_GENITALIA_DEVELOPMENT	http://www.gsea-msigdb.org/gsea/msigdb/cards/GO_MALE_GENITALIA_DEVELOPMENT	9	0	1	1
iPSC-CVPC	Heart	c5.bp	GO_REGULATION_OF_HYDROLASE_ACTIVITY	http://www.gsea-msigdb.org/gsea/msigdb/cards/GO_REGULATION_OF_HYDROLASE_ACTIVITY	749	1.04223255432043	0.832829482996738	1
iPSC-CVPC	Arteria	c5.bp	GO_REGULATION_OF_HYDROLASE_ACTIVITY	http://www.gsea-msigdb.org/gsea/msigdb/cards/GO_REGULATION_OF_HYDROLASE_ACTIVITY	749	0.858885751895023	0.453948674667082	1
Heart	Arteria	c5.bp	GO_REGULATION_OF_HYDROLASE_ACTIVITY	http://www.gsea-msigdb.org/gsea/msigdb/cards/GO_REGULATION_OF_HYDROLASE_ACTIVITY	749	1.72107340244117	0.0824649644700594	1
iPSC-CVPC	Arteria	c5.bp	GO_GLUTAMINE_FAMILY_AMINO_ACID_CATABOLIC_PROCESS	http://www.gsea-msigdb.org/gsea/msigdb/cards/GO_GLUTAMINE_FAMILY_AMINO_ACID_CATABOLIC_PROCESS	12	1.56288361152648	0.492970723871524	1
iPSC-CVPC	Heart	c5.bp	GO_REGULATION_OF_HETEROTYPIC_CELL_CELL_ADHESION	http://www.gsea-msigdb.org/gsea/msigdb/cards/GO_REGULATION_OF_HETEROTYPIC_CELL_CELL_ADHESION	15	0	1	1
Heart	Arteria	c5.bp	GO_REGULATION_OF_HETEROTYPIC_CELL_CELL_ADHESION	http://www.gsea-msigdb.org/gsea/msigdb/cards/GO_REGULATION_OF_HETEROTYPIC_CELL_CELL_ADHESION	15	0	1	1
iPSC-CVPC	Heart	c5.bp	GO_MITOCHONDRIAL_DNA_METABOLIC_PROCESS	http://www.gsea-msigdb.org/gsea/msigdb/cards/GO_MITOCHONDRIAL_DNA_METABOLIC_PROCESS	10	3.21625307367113	0.28848373142765	1
iPSC-CVPC	Arteria	c5.bp	GO_MITOCHONDRIAL_DNA_METABOLIC_PROCESS	http://www.gsea-msigdb.org/gsea/msigdb/cards/GO_MITOCHONDRIAL_DNA_METABOLIC_PROCESS	10	0	1	1
Heart	Arteria	c5.bp	GO_MITOCHONDRIAL_DNA_METABOLIC_PROCESS	http://www.gsea-msigdb.org/gsea/msigdb/cards/GO_MITOCHONDRIAL_DNA_METABOLIC_PROCESS	10	0	1	1
iPSC-CVPC	Arteria	c5.bp	GO_SPINDLE_LOCALIZATION	http://www.gsea-msigdb.org/gsea/msigdb/cards/GO_SPINDLE_LOCALIZATION	31	4.15510064115875	0.00610956588570039	0.804935305441026
iPSC-CVPC	Heart	c5.bp	GO_REGULATION_OF_PROTEIN_SUMOYLATION	http://www.gsea-msigdb.org/gsea/msigdb/cards/GO_REGULATION_OF_PROTEIN_SUMOYLATION	15	0	1	1
iPSC-CVPC	Arteria	c5.bp	GO_REGULATION_OF_PROTEIN_SUMOYLATION	http://www.gsea-msigdb.org/gsea/msigdb/cards/GO_REGULATION_OF_PROTEIN_SUMOYLATION	15	1.22766633681219	0.572202813746029	1
Heart	Arteria	c5.bp	GO_RESPONSE_TO_ENDOPLASMIC_RETICULUM_STRESS	http://www.gsea-msigdb.org/gsea/msigdb/cards/GO_RESPONSE_TO_ENDOPLASMIC_RETICULUM_STRESS	189	3.43855932524573	0.0107855893937407	0.989855946416975
iPSC-CVPC	Heart	c5.bp	GO_NEGATIVE_REGULATION_OF_PRODUCTION_OF_MOLECULAR_MEDIATOR_OF_IMMUNE_RESPONSE	http://www.gsea-msigdb.org/gsea/msigdb/cards/GO_NEGATIVE_REGULATION_OF_PRODUCTION_OF_MOLECULAR_MEDIATOR_OF_IMMUNE_RESPONSE	16	1.92888173685684	0.419999940957385	1
iPSC-CVPC	Arteria	c5.bp	GO_NEGATIVE_REGULATION_OF_PRODUCTION_OF_MOLECULAR_MEDIATOR_OF_IMMUNE_RESPONSE	http://www.gsea-msigdb.org/gsea/msigdb/cards/GO_NEGATIVE_REGULATION_OF_PRODUCTION_OF_MOLECULAR_MEDIATOR_OF_IMMUNE_RESPONSE	16	1.14571734678302	0.595764171255043	1
Heart	Arteria	c5.bp	GO_SPHINGOLIPID_MEDIATED_SIGNALING_PATHWAY	http://www.gsea-msigdb.org/gsea/msigdb/cards/GO_SPHINGOLIPID_MEDIATED_SIGNALING_PATHWAY	5	0	1	1
iPSC-CVPC	Heart	c5.bp	GO_NUCLEOTIDE_BINDING_DOMAIN_LEUCINE_RICH_REPEAT_CONTAINING_RECEPTOR_SIGNALING_PATHWAY	http://www.gsea-msigdb.org/gsea/msigdb/cards/GO_NUCLEOTIDE_BINDING_DOMAIN_LEUCINE_RICH_REPEAT_CONTAINING_RECEPTOR_SIGNALING_PATHWAY	27	0	1	1
iPSC-CVPC	Arteria	c5.bp	GO_NUCLEOTIDE_BINDING_DOMAIN_LEUCINE_RICH_REPEAT_CONTAINING_RECEPTOR_SIGNALING_PATHWAY	http://www.gsea-msigdb.org/gsea/msigdb/cards/GO_NUCLEOTIDE_BINDING_DOMAIN_LEUCINE_RICH_REPEAT_CONTAINING_RECEPTOR_SIGNALING_PATHWAY	27	0.660290068265155	1	1
iPSC-CVPC	Heart	c5.bp	GO_TRANSCRIPTION_COUPLED_NUCLEOTIDE_EXCISION_REPAIR	http://www.gsea-msigdb.org/gsea/msigdb/cards/GO_TRANSCRIPTION_COUPLED_NUCLEOTIDE_EXCISION_REPAIR	54	0.543957240952901	1	1
iPSC-CVPC	Arteria	c5.bp	GO_TRANSCRIPTION_COUPLED_NUCLEOTIDE_EXCISION_REPAIR	http://www.gsea-msigdb.org/gsea/msigdb/cards/GO_TRANSCRIPTION_COUPLED_NUCLEOTIDE_EXCISION_REPAIR	54	1.0107777102774	1	1
iPSC-CVPC	Heart	c5.bp	GO_NEGATIVE_REGULATION_OF_LEUKOCYTE_MEDIATED_IMMUNITY	http://www.gsea-msigdb.org/gsea/msigdb/cards/GO_NEGATIVE_REGULATION_OF_LEUKOCYTE_MEDIATED_IMMUNITY	21	0	1	1
iPSC-CVPC	Arteria	c5.bp	GO_NEGATIVE_REGULATION_OF_LEUKOCYTE_MEDIATED_IMMUNITY	http://www.gsea-msigdb.org/gsea/msigdb/cards/GO_NEGATIVE_REGULATION_OF_LEUKOCYTE_MEDIATED_IMMUNITY	21	0.858882501292722	1	1
Heart	Arteria	c5.bp	GO_NEGATIVE_REGULATION_OF_LEUKOCYTE_MEDIATED_IMMUNITY	http://www.gsea-msigdb.org/gsea/msigdb/cards/GO_NEGATIVE_REGULATION_OF_LEUKOCYTE_MEDIATED_IMMUNITY	21	0	1	1
iPSC-CVPC	Heart	c5.bp	GO_POSITIVE_REGULATION_OF_CREB_TRANSCRIPTION_FACTOR_ACTIVITY	http://www.gsea-msigdb.org/gsea/msigdb/cards/GO_POSITIVE_REGULATION_OF_CREB_TRANSCRIPTION_FACTOR_ACTIVITY	13	2.41165437315027	0.35758926732267	1
iPSC-CVPC	Heart	c5.bp	GO_MODIFIED_AMINO_ACID_TRANSPORT	http://www.gsea-msigdb.org/gsea/msigdb/cards/GO_MODIFIED_AMINO_ACID_TRANSPORT	14	0	1	1
iPSC-CVPC	Arteria	c5.bp	GO_MODIFIED_AMINO_ACID_TRANSPORT	http://www.gsea-msigdb.org/gsea/msigdb/cards/GO_MODIFIED_AMINO_ACID_TRANSPORT	14	4.70365915905791	0.0382594182433603	1
Heart	Arteria	c5.bp	GO_CGMP_BIOSYNTHETIC_PROCESS	http://www.gsea-msigdb.org/gsea/msigdb/cards/GO_CGMP_BIOSYNTHETIC_PROCESS	5	0	1	1
iPSC-CVPC	Heart	c5.bp	GO_ALTERNATIVE_MRNA_SPLICING_VIA_SPLICEOSOME	http://www.gsea-msigdb.org/gsea/msigdb/cards/GO_ALTERNATIVE_MRNA_SPLICING_VIA_SPLICEOSOME	57	6.29389315234799	1.64220348707897e-05	0.022967479000251
iPSC-CVPC	Arteria	c5.bp	GO_ALTERNATIVE_MRNA_SPLICING_VIA_SPLICEOSOME	http://www.gsea-msigdb.org/gsea/msigdb/cards/GO_ALTERNATIVE_MRNA_SPLICING_VIA_SPLICEOSOME	57	1.29877484725436	0.554798124519336	1
iPSC-CVPC	Heart	c5.bp	GO_ASSOCIATIVE_LEARNING	http://www.gsea-msigdb.org/gsea/msigdb/cards/GO_ASSOCIATIVE_LEARNING	40	0.740220986443109	1	1
iPSC-CVPC	Arteria	c5.bp	GO_ASSOCIATIVE_LEARNING	http://www.gsea-msigdb.org/gsea/msigdb/cards/GO_ASSOCIATIVE_LEARNING	40	0.904010334555831	1	1
Heart	Arteria	c5.bp	GO_ASSOCIATIVE_LEARNING	http://www.gsea-msigdb.org/gsea/msigdb/cards/GO_ASSOCIATIVE_LEARNING	40	5.37927521056961	0.0587135381536518	1
iPSC-CVPC	Heart	c5.bp	GO_SNORNA_METABOLIC_PROCESS	http://www.gsea-msigdb.org/gsea/msigdb/cards/GO_SNORNA_METABOLIC_PROCESS	8	0	1	1
iPSC-CVPC	Arteria	c5.bp	GO_SNORNA_METABOLIC_PROCESS	http://www.gsea-msigdb.org/gsea/msigdb/cards/GO_SNORNA_METABOLIC_PROCESS	8	0	1	1
iPSC-CVPC	Heart	c5.bp	GO_REGULATION_OF_RESPONSE_TO_EXTRACELLULAR_STIMULUS	http://www.gsea-msigdb.org/gsea/msigdb/cards/GO_REGULATION_OF_RESPONSE_TO_EXTRACELLULAR_STIMULUS	13	0	1	1
iPSC-CVPC	Arteria	c5.bp	GO_REGULATION_OF_RESPONSE_TO_EXTRACELLULAR_STIMULUS	http://www.gsea-msigdb.org/gsea/msigdb/cards/GO_REGULATION_OF_RESPONSE_TO_EXTRACELLULAR_STIMULUS	13	1.4325200938926	0.520888009781609	1
Heart	Arteria	c5.bp	GO_REGULATION_OF_RESPONSE_TO_EXTRACELLULAR_STIMULUS	http://www.gsea-msigdb.org/gsea/msigdb/cards/GO_REGULATION_OF_RESPONSE_TO_EXTRACELLULAR_STIMULUS	13	0	1	1
Heart	Arteria	c5.bp	GO_NEGATIVE_REGULATION_OF_DNA_REPAIR	http://www.gsea-msigdb.org/gsea/msigdb/cards/GO_NEGATIVE_REGULATION_OF_DNA_REPAIR	19	0	1	1
iPSC-CVPC	Heart	c5.bp	GO_CHROMOSOME_LOCALIZATION	http://www.gsea-msigdb.org/gsea/msigdb/cards/GO_CHROMOSOME_LOCALIZATION	42	1.44723994581979	0.651371694042805	1
Heart	Arteria	c5.bp	GO_CHROMOSOME_LOCALIZATION	http://www.gsea-msigdb.org/gsea/msigdb/cards/GO_CHROMOSOME_LOCALIZATION	42	0	1	1
iPSC-CVPC	Heart	c5.bp	GO_HISTONE_METHYLATION	http://www.gsea-msigdb.org/gsea/msigdb/cards/GO_HISTONE_METHYLATION	87	0.334160448850378	0.372688702316307	1
iPSC-CVPC	Heart	c5.bp	GO_CELLULAR_RESPONSE_TO_FLUID_SHEAR_STRESS	http://www.gsea-msigdb.org/gsea/msigdb/cards/GO_CELLULAR_RESPONSE_TO_FLUID_SHEAR_STRESS	15	0	1	1
iPSC-CVPC	Arteria	c5.bp	GO_CELLULAR_RESPONSE_TO_FLUID_SHEAR_STRESS	http://www.gsea-msigdb.org/gsea/msigdb/cards/GO_CELLULAR_RESPONSE_TO_FLUID_SHEAR_STRESS	15	0	1	1
iPSC-CVPC	Arteria	c5.bp	GO_ESTABLISHMENT_OF_PROTEIN_LOCALIZATION_TO_CHROMOSOME	http://www.gsea-msigdb.org/gsea/msigdb/cards/GO_ESTABLISHMENT_OF_PROTEIN_LOCALIZATION_TO_CHROMOSOME	19	0.954497488400478	1	1
iPSC-CVPC	Heart	c5.bp	GO_PEPTIDE_CROSS_LINKING	http://www.gsea-msigdb.org/gsea/msigdb/cards/GO_PEPTIDE_CROSS_LINKING	10	0	1	1
Heart	Arteria	c5.bp	GO_PEPTIDE_CROSS_LINKING	http://www.gsea-msigdb.org/gsea/msigdb/cards/GO_PEPTIDE_CROSS_LINKING	10	0	1	1
iPSC-CVPC	Heart	c5.bp	GO_NEGATIVE_REGULATION_OF_RESPONSE_TO_DNA_DAMAGE_STIMULUS	http://www.gsea-msigdb.org/gsea/msigdb/cards/GO_NEGATIVE_REGULATION_OF_RESPONSE_TO_DNA_DAMAGE_STIMULUS	52	1.15671423339393	0.693005855968682	1
iPSC-CVPC	Arteria	c5.bp	GO_NEGATIVE_REGULATION_OF_RESPONSE_TO_DNA_DAMAGE_STIMULUS	http://www.gsea-msigdb.org/gsea/msigdb/cards/GO_NEGATIVE_REGULATION_OF_RESPONSE_TO_DNA_DAMAGE_STIMULUS	52	2.692787351614	0.0228576341786518	1
iPSC-CVPC	Heart	c5.bp	GO_TRNA_METABOLIC_PROCESS	http://www.gsea-msigdb.org/gsea/msigdb/cards/GO_TRNA_METABOLIC_PROCESS	132	0.218410100389339	0.136393531846804	1
iPSC-CVPC	Arteria	c5.bp	GO_TRNA_METABOLIC_PROCESS	http://www.gsea-msigdb.org/gsea/msigdb/cards/GO_TRNA_METABOLIC_PROCESS	132	1.73309934036032	0.0804774045542135	1
Heart	Arteria	c5.bp	GO_TRNA_METABOLIC_PROCESS	http://www.gsea-msigdb.org/gsea/msigdb/cards/GO_TRNA_METABOLIC_PROCESS	132	0.766091189375491	1	1
iPSC-CVPC	Heart	c5.bp	GO_NEGATIVE_REGULATION_OF_ATPASE_ACTIVITY	http://www.gsea-msigdb.org/gsea/msigdb/cards/GO_NEGATIVE_REGULATION_OF_ATPASE_ACTIVITY	12	0	1	1
iPSC-CVPC	Heart	c5.bp	GO_CELLULAR_RESPONSE_TO_PROSTAGLANDIN_STIMULUS	http://www.gsea-msigdb.org/gsea/msigdb/cards/GO_CELLULAR_RESPONSE_TO_PROSTAGLANDIN_STIMULUS	14	0	1	1
iPSC-CVPC	Heart	c5.bp	GO_RESPONSE_TO_HEAT	http://www.gsea-msigdb.org/gsea/msigdb/cards/GO_RESPONSE_TO_HEAT	108	1.1126483394893	0.784563105242964	1
iPSC-CVPC	Arteria	c5.bp	GO_RESPONSE_TO_HEAT	http://www.gsea-msigdb.org/gsea/msigdb/cards/GO_RESPONSE_TO_HEAT	108	1.19313204159726	0.66797858199006	1
Heart	Arteria	c5.bp	GO_RESPONSE_TO_HEAT	http://www.gsea-msigdb.org/gsea/msigdb/cards/GO_RESPONSE_TO_HEAT	108	0.940066374238432	1	1
iPSC-CVPC	Arteria	c5.bp	GO_CELLULAR_RESPONSE_TO_CADMIUM_ION	http://www.gsea-msigdb.org/gsea/msigdb/cards/GO_CELLULAR_RESPONSE_TO_CADMIUM_ION	13	3.13073728899637	0.157963292950505	1
Heart	Arteria	c5.bp	GO_CELLULAR_RESPONSE_TO_CADMIUM_ION	http://www.gsea-msigdb.org/gsea/msigdb/cards/GO_CELLULAR_RESPONSE_TO_CADMIUM_ION	13	0	1	1
Heart	Arteria	c5.bp	GO_REGULATION_OF_KINASE_ACTIVITY	http://www.gsea-msigdb.org/gsea/msigdb/cards/GO_REGULATION_OF_KINASE_ACTIVITY	536	0.945107961598045	1	1
Heart	Arteria	c5.bp	GO_POSITIVE_REGULATION_OF_LYMPHOCYTE_MIGRATION	http://www.gsea-msigdb.org/gsea/msigdb/cards/GO_POSITIVE_REGULATION_OF_LYMPHOCYTE_MIGRATION	22	0	1	1
iPSC-CVPC	Heart	c5.bp	GO_POSITIVE_REGULATION_OF_CELLULAR_EXTRAVASATION	http://www.gsea-msigdb.org/gsea/msigdb/cards/GO_POSITIVE_REGULATION_OF_CELLULAR_EXTRAVASATION	10	0	1	1
iPSC-CVPC	Arteria	c5.bp	GO_POSITIVE_REGULATION_OF_CELLULAR_EXTRAVASATION	http://www.gsea-msigdb.org/gsea/msigdb/cards/GO_POSITIVE_REGULATION_OF_CELLULAR_EXTRAVASATION	10	0	1	1
iPSC-CVPC	Arteria	c5.bp	GO_DNA_STRAND_ELONGATION_INVOLVED_IN_DNA_REPLICATION	http://www.gsea-msigdb.org/gsea/msigdb/cards/GO_DNA_STRAND_ELONGATION_INVOLVED_IN_DNA_REPLICATION	14	0	1	1
Heart	Arteria	c5.bp	GO_DNA_STRAND_ELONGATION_INVOLVED_IN_DNA_REPLICATION	http://www.gsea-msigdb.org/gsea/msigdb/cards/GO_DNA_STRAND_ELONGATION_INVOLVED_IN_DNA_REPLICATION	14	0	1	1
Heart	Arteria	c5.bp	GO_CELLULAR_MODIFIED_AMINO_ACID_CATABOLIC_PROCESS	http://www.gsea-msigdb.org/gsea/msigdb/cards/GO_CELLULAR_MODIFIED_AMINO_ACID_CATABOLIC_PROCESS	15	0	1	1
Heart	Arteria	c5.bp	GO_SERTOLI_CELL_DEVELOPMENT	http://www.gsea-msigdb.org/gsea/msigdb/cards/GO_SERTOLI_CELL_DEVELOPMENT	7	0	1	1
Heart	Arteria	c5.bp	GO_NEGATIVE_REGULATION_OF_RNA_SPLICING	http://www.gsea-msigdb.org/gsea/msigdb/cards/GO_NEGATIVE_REGULATION_OF_RNA_SPLICING	20	0	1	1
Heart	Arteria	c5.bp	GO_CELL_CYCLE_PHASE_TRANSITION	http://www.gsea-msigdb.org/gsea/msigdb/cards/GO_CELL_CYCLE_PHASE_TRANSITION	396	2.4659629624281	0.0158988893457748	1
iPSC-CVPC	Heart	c5.bp	GO_TISSUE_MORPHOGENESIS	http://www.gsea-msigdb.org/gsea/msigdb/cards/GO_TISSUE_MORPHOGENESIS	387	0.679948374730676	0.312944143469988	1
iPSC-CVPC	Arteria	c5.bp	GO_TISSUE_MORPHOGENESIS	http://www.gsea-msigdb.org/gsea/msigdb/cards/GO_TISSUE_MORPHOGENESIS	387	1.08915109105964	0.650072300097482	1
Heart	Arteria	c5.bp	GO_SERINE_FAMILY_AMINO_ACID_BIOSYNTHETIC_PROCESS	http://www.gsea-msigdb.org/gsea/msigdb/cards/GO_SERINE_FAMILY_AMINO_ACID_BIOSYNTHETIC_PROCESS	11	0	1	1
iPSC-CVPC	Heart	c5.bp	GO_CELLULAR_RESPONSE_TO_CARBOHYDRATE_STIMULUS	http://www.gsea-msigdb.org/gsea/msigdb/cards/GO_CELLULAR_RESPONSE_TO_CARBOHYDRATE_STIMULUS	81	2.33384955303368	0.0536404013669969	1
iPSC-CVPC	Heart	c5.bp	GO_INOSITOL_PHOSPHATE_CATABOLIC_PROCESS	http://www.gsea-msigdb.org/gsea/msigdb/cards/GO_INOSITOL_PHOSPHATE_CATABOLIC_PROCESS	12	0	1	1
iPSC-CVPC	Arteria	c5.bp	GO_INOSITOL_PHOSPHATE_CATABOLIC_PROCESS	http://www.gsea-msigdb.org/gsea/msigdb/cards/GO_INOSITOL_PHOSPHATE_CATABOLIC_PROCESS	12	0	1	1
iPSC-CVPC	Heart	c5.bp	GO_C21_STEROID_HORMONE_METABOLIC_PROCESS	http://www.gsea-msigdb.org/gsea/msigdb/cards/GO_C21_STEROID_HORMONE_METABOLIC_PROCESS	19	0	1	1
iPSC-CVPC	Arteria	c5.bp	GO_C21_STEROID_HORMONE_METABOLIC_PROCESS	http://www.gsea-msigdb.org/gsea/msigdb/cards/GO_C21_STEROID_HORMONE_METABOLIC_PROCESS	19	2.02475617469779	0.281157362561673	1
iPSC-CVPC	Heart	c5.bp	GO_TRANSMISSION_OF_NERVE_IMPULSE	http://www.gsea-msigdb.org/gsea/msigdb/cards/GO_TRANSMISSION_OF_NERVE_IMPULSE	24	0	1	1
iPSC-CVPC	Arteria	c5.bp	GO_TRANSMISSION_OF_NERVE_IMPULSE	http://www.gsea-msigdb.org/gsea/msigdb/cards/GO_TRANSMISSION_OF_NERVE_IMPULSE	24	0	0.640378071435149	1
iPSC-CVPC	Heart	c5.bp	GO_POSITIVE_REGULATION_OF_EPIDERMAL_CELL_DIFFERENTIATION	http://www.gsea-msigdb.org/gsea/msigdb/cards/GO_POSITIVE_REGULATION_OF_EPIDERMAL_CELL_DIFFERENTIATION	11	0	1	1
iPSC-CVPC	Arteria	c5.bp	GO_POSITIVE_REGULATION_OF_EPIDERMAL_CELL_DIFFERENTIATION	http://www.gsea-msigdb.org/gsea/msigdb/cards/GO_POSITIVE_REGULATION_OF_EPIDERMAL_CELL_DIFFERENTIATION	11	1.71933654701835	0.463429663316942	1
iPSC-CVPC	Heart	c5.bp	GO_REGULATION_OF_SUPEROXIDE_ANION_GENERATION	http://www.gsea-msigdb.org/gsea/msigdb/cards/GO_REGULATION_OF_SUPEROXIDE_ANION_GENERATION	9	0	1	1
iPSC-CVPC	Heart	c5.bp	GO_POSITIVE_REGULATION_OF_MITOTIC_CELL_CYCLE	http://www.gsea-msigdb.org/gsea/msigdb/cards/GO_POSITIVE_REGULATION_OF_MITOTIC_CELL_CYCLE	88	0	0.123576576624038	1
iPSC-CVPC	Arteria	c5.bp	GO_POSITIVE_REGULATION_OF_MITOTIC_CELL_CYCLE	http://www.gsea-msigdb.org/gsea/msigdb/cards/GO_POSITIVE_REGULATION_OF_MITOTIC_CELL_CYCLE	88	1.49065552681056	0.339746650417502	1
iPSC-CVPC	Heart	c5.bp	GO_NEGATIVE_REGULATION_OF_INTRACELLULAR_ESTROGEN_RECEPTOR_SIGNALING_PATHWAY	http://www.gsea-msigdb.org/gsea/msigdb/cards/GO_NEGATIVE_REGULATION_OF_INTRACELLULAR_ESTROGEN_RECEPTOR_SIGNALING_PATHWAY	6	0	1	1
iPSC-CVPC	Arteria	c5.bp	GO_NEGATIVE_REGULATION_OF_INTRACELLULAR_ESTROGEN_RECEPTOR_SIGNALING_PATHWAY	http://www.gsea-msigdb.org/gsea/msigdb/cards/GO_NEGATIVE_REGULATION_OF_INTRACELLULAR_ESTROGEN_RECEPTOR_SIGNALING_PATHWAY	6	0	1	1
iPSC-CVPC	Arteria	c5.bp	GO_REGULATION_OF_TYPE_2_IMMUNE_RESPONSE	http://www.gsea-msigdb.org/gsea/msigdb/cards/GO_REGULATION_OF_TYPE_2_IMMUNE_RESPONSE	15	0	1	1
iPSC-CVPC	Heart	c5.bp	GO_3_UTR_MEDIATED_MRNA_STABILIZATION	http://www.gsea-msigdb.org/gsea/msigdb/cards/GO_3_UTR_MEDIATED_MRNA_STABILIZATION	14	4.83652153478667	0.077905570291198	1
iPSC-CVPC	Arteria	c5.bp	GO_3_UTR_MEDIATED_MRNA_STABILIZATION	http://www.gsea-msigdb.org/gsea/msigdb/cards/GO_3_UTR_MEDIATED_MRNA_STABILIZATION	14	0	1	1
iPSC-CVPC	Heart	c5.bp	GO_RESPONSE_TO_PHENYLPROPANOID	http://www.gsea-msigdb.org/gsea/msigdb/cards/GO_RESPONSE_TO_PHENYLPROPANOID	2	0	1	1
Heart	Arteria	c5.bp	GO_RESPONSE_TO_PHENYLPROPANOID	http://www.gsea-msigdb.org/gsea/msigdb/cards/GO_RESPONSE_TO_PHENYLPROPANOID	2	0	1	1
iPSC-CVPC	Arteria	c5.bp	GO_POSITIVE_REGULATION_OF_NOTCH_SIGNALING_PATHWAY	http://www.gsea-msigdb.org/gsea/msigdb/cards/GO_POSITIVE_REGULATION_OF_NOTCH_SIGNALING_PATHWAY	31	0.572025324734751	1	1
iPSC-CVPC	Heart	c5.bp	GO_CONTRACTILE_ACTIN_FILAMENT_BUNDLE_ASSEMBLY	http://www.gsea-msigdb.org/gsea/msigdb/cards/GO_CONTRACTILE_ACTIN_FILAMENT_BUNDLE_ASSEMBLY	71	1.27713365049167	0.5142836878381	1
iPSC-CVPC	Heart	c5.bp	GO_ACTIVATION_OF_ADENYLATE_CYCLASE_ACTIVITY	http://www.gsea-msigdb.org/gsea/msigdb/cards/GO_ACTIVATION_OF_ADENYLATE_CYCLASE_ACTIVITY	15	0	1	1
iPSC-CVPC	Arteria	c5.bp	GO_ACTIVATION_OF_ADENYLATE_CYCLASE_ACTIVITY	http://www.gsea-msigdb.org/gsea/msigdb/cards/GO_ACTIVATION_OF_ADENYLATE_CYCLASE_ACTIVITY	15	1.22766633681219	0.572202813746029	1
Heart	Arteria	c5.bp	GO_ACTIVATION_OF_ADENYLATE_CYCLASE_ACTIVITY	http://www.gsea-msigdb.org/gsea/msigdb/cards/GO_ACTIVATION_OF_ADENYLATE_CYCLASE_ACTIVITY	15	0	1	1
iPSC-CVPC	Heart	c5.bp	GO_MITOCHONDRIAL_TRANSPORT	http://www.gsea-msigdb.org/gsea/msigdb/cards/GO_MITOCHONDRIAL_TRANSPORT	156	2.00724139574092	0.0413328482618458	1
iPSC-CVPC	Arteria	c5.bp	GO_MITOCHONDRIAL_TRANSPORT	http://www.gsea-msigdb.org/gsea/msigdb/cards/GO_MITOCHONDRIAL_TRANSPORT	156	1.05280155316307	0.858772244150003	1
Heart	Arteria	c5.bp	GO_MITOCHONDRIAL_TRANSPORT	http://www.gsea-msigdb.org/gsea/msigdb/cards/GO_MITOCHONDRIAL_TRANSPORT	156	4.2079692730334	0.00434183714398406	0.701698773629744
iPSC-CVPC	Heart	c5.bp	GO_SULFUR_COMPOUND_BIOSYNTHETIC_PROCESS	http://www.gsea-msigdb.org/gsea/msigdb/cards/GO_SULFUR_COMPOUND_BIOSYNTHETIC_PROCESS	117	1.85556594081958	0.115421945917463	1
iPSC-CVPC	Arteria	c5.bp	GO_SULFUR_COMPOUND_BIOSYNTHETIC_PROCESS	http://www.gsea-msigdb.org/gsea/msigdb/cards/GO_SULFUR_COMPOUND_BIOSYNTHETIC_PROCESS	117	1.09451722786396	0.836887406786268	1
Heart	Arteria	c5.bp	GO_SULFUR_COMPOUND_BIOSYNTHETIC_PROCESS	http://www.gsea-msigdb.org/gsea/msigdb/cards/GO_SULFUR_COMPOUND_BIOSYNTHETIC_PROCESS	117	1.76483745290604	0.320160261694824	1
iPSC-CVPC	Heart	c5.bp	GO_REGULATION_OF_RESPIRATORY_GASEOUS_EXCHANGE_BY_NERVOUS_SYSTEM_PROCESS	http://www.gsea-msigdb.org/gsea/msigdb/cards/GO_REGULATION_OF_RESPIRATORY_GASEOUS_EXCHANGE_BY_NERVOUS_SYSTEM_PROCESS	7	0	1	1
iPSC-CVPC	Arteria	c5.bp	GO_REGULATION_OF_RESPIRATORY_GASEOUS_EXCHANGE_BY_NERVOUS_SYSTEM_PROCESS	http://www.gsea-msigdb.org/gsea/msigdb/cards/GO_REGULATION_OF_RESPIRATORY_GASEOUS_EXCHANGE_BY_NERVOUS_SYSTEM_PROCESS	7	0	1	1
iPSC-CVPC	Heart	c5.bp	GO_PROTEIN_TARGETING	http://www.gsea-msigdb.org/gsea/msigdb/cards/GO_PROTEIN_TARGETING	251	1.20473006640619	0.591036822443926	1
iPSC-CVPC	Arteria	c5.bp	GO_PROTEIN_TARGETING	http://www.gsea-msigdb.org/gsea/msigdb/cards/GO_PROTEIN_TARGETING	251	1.58982341230614	0.0494261913323849	1
Heart	Arteria	c5.bp	GO_PROTEIN_TARGETING	http://www.gsea-msigdb.org/gsea/msigdb/cards/GO_PROTEIN_TARGETING	251	2.09773976271828	0.101356144117044	1
Heart	Arteria	c5.bp	GO_POSITIVE_REGULATION_OF_CHOLESTEROL_EFFLUX	http://www.gsea-msigdb.org/gsea/msigdb/cards/GO_POSITIVE_REGULATION_OF_CHOLESTEROL_EFFLUX	12	0	1	1
iPSC-CVPC	Heart	c5.bp	GO_POSITIVE_REGULATION_OF_VIRAL_GENOME_REPLICATION	http://www.gsea-msigdb.org/gsea/msigdb/cards/GO_POSITIVE_REGULATION_OF_VIRAL_GENOME_REPLICATION	21	1.44598311363395	0.510868982714056	1
iPSC-CVPC	Arteria	c5.bp	GO_POSITIVE_REGULATION_OF_VIRAL_GENOME_REPLICATION	http://www.gsea-msigdb.org/gsea/msigdb/cards/GO_POSITIVE_REGULATION_OF_VIRAL_GENOME_REPLICATION	21	0.858882501292722	1	1
iPSC-CVPC	Arteria	c5.bp	GO_GLIAL_CELL_DEVELOPMENT	http://www.gsea-msigdb.org/gsea/msigdb/cards/GO_GLIAL_CELL_DEVELOPMENT	66	2.38846729727231	0.0275800034935735	1
Heart	Arteria	c5.bp	GO_GLIAL_CELL_DEVELOPMENT	http://www.gsea-msigdb.org/gsea/msigdb/cards/GO_GLIAL_CELL_DEVELOPMENT	66	0	1	1
iPSC-CVPC	Heart	c5.bp	GO_REGULATION_OF_RETINOIC_ACID_RECEPTOR_SIGNALING_PATHWAY	http://www.gsea-msigdb.org/gsea/msigdb/cards/GO_REGULATION_OF_RETINOIC_ACID_RECEPTOR_SIGNALING_PATHWAY	9	0	1	1
iPSC-CVPC	Arteria	c5.bp	GO_REGULATION_OF_RETINOIC_ACID_RECEPTOR_SIGNALING_PATHWAY	http://www.gsea-msigdb.org/gsea/msigdb/cards/GO_REGULATION_OF_RETINOIC_ACID_RECEPTOR_SIGNALING_PATHWAY	9	0	1	1
Heart	Arteria	c5.bp	GO_REGULATION_OF_RETINOIC_ACID_RECEPTOR_SIGNALING_PATHWAY	http://www.gsea-msigdb.org/gsea/msigdb/cards/GO_REGULATION_OF_RETINOIC_ACID_RECEPTOR_SIGNALING_PATHWAY	9	0	1	1
iPSC-CVPC	Heart	c5.bp	GO_REGULATION_OF_SYSTEMIC_ARTERIAL_BLOOD_PRESSURE	http://www.gsea-msigdb.org/gsea/msigdb/cards/GO_REGULATION_OF_SYSTEMIC_ARTERIAL_BLOOD_PRESSURE	44	0.671105563981413	1	1
iPSC-CVPC	Arteria	c5.bp	GO_REGULATION_OF_SYSTEMIC_ARTERIAL_BLOOD_PRESSURE	http://www.gsea-msigdb.org/gsea/msigdb/cards/GO_REGULATION_OF_SYSTEMIC_ARTERIAL_BLOOD_PRESSURE	44	0.398586655630671	0.516502856032231	1
iPSC-CVPC	Arteria	c5.bp	GO_SECOND_MESSENGER_MEDIATED_SIGNALING	http://www.gsea-msigdb.org/gsea/msigdb/cards/GO_SECOND_MESSENGER_MEDIATED_SIGNALING	203	0.888378264197698	0.876248597890407	1
Heart	Arteria	c5.bp	GO_SECOND_MESSENGER_MEDIATED_SIGNALING	http://www.gsea-msigdb.org/gsea/msigdb/cards/GO_SECOND_MESSENGER_MEDIATED_SIGNALING	203	2.06340057631014	0.139690324990233	1
iPSC-CVPC	Arteria	c5.bp	GO_POSITIVE_REGULATION_OF_COAGULATION	http://www.gsea-msigdb.org/gsea/msigdb/cards/GO_POSITIVE_REGULATION_OF_COAGULATION	14	1.32222215691555	0.547270630631346	1
Heart	Arteria	c5.bp	GO_POSITIVE_REGULATION_OF_COAGULATION	http://www.gsea-msigdb.org/gsea/msigdb/cards/GO_POSITIVE_REGULATION_OF_COAGULATION	14	7.80250870859287	0.12933455037263	1
iPSC-CVPC	Arteria	c5.bp	GO_LUNG_MORPHOGENESIS	http://www.gsea-msigdb.org/gsea/msigdb/cards/GO_LUNG_MORPHOGENESIS	30	0.591808830738426	1	1
Heart	Arteria	c5.bp	GO_LUNG_MORPHOGENESIS	http://www.gsea-msigdb.org/gsea/msigdb/cards/GO_LUNG_MORPHOGENESIS	30	0	1	1
iPSC-CVPC	Heart	c5.bp	GO_VASCULAR_ENDOTHELIAL_GROWTH_FACTOR_RECEPTOR_SIGNALING_PATHWAY	http://www.gsea-msigdb.org/gsea/msigdb/cards/GO_VASCULAR_ENDOTHELIAL_GROWTH_FACTOR_RECEPTOR_SIGNALING_PATHWAY	61	2.03927031468902	0.146662669841537	1
iPSC-CVPC	Arteria	c5.bp	GO_VASCULAR_ENDOTHELIAL_GROWTH_FACTOR_RECEPTOR_SIGNALING_PATHWAY	http://www.gsea-msigdb.org/gsea/msigdb/cards/GO_VASCULAR_ENDOTHELIAL_GROWTH_FACTOR_RECEPTOR_SIGNALING_PATHWAY	61	1.88338550379463	0.148801058081963	1
iPSC-CVPC	Arteria	c5.bp	GO_POSITIVE_REGULATION_OF_MAPK_CASCADE	http://www.gsea-msigdb.org/gsea/msigdb/cards/GO_POSITIVE_REGULATION_OF_MAPK_CASCADE	284	0.620625782251357	0.184677399991644	1
iPSC-CVPC	Heart	c5.bp	GO_NEGATIVE_REGULATION_OF_TOLL_LIKE_RECEPTOR_SIGNALING_PATHWAY	http://www.gsea-msigdb.org/gsea/msigdb/cards/GO_NEGATIVE_REGULATION_OF_TOLL_LIKE_RECEPTOR_SIGNALING_PATHWAY	22	1.37700733198433	0.527262127022268	1
iPSC-CVPC	Arteria	c5.bp	GO_NEGATIVE_REGULATION_OF_TOLL_LIKE_RECEPTOR_SIGNALING_PATHWAY	http://www.gsea-msigdb.org/gsea/msigdb/cards/GO_NEGATIVE_REGULATION_OF_TOLL_LIKE_RECEPTOR_SIGNALING_PATHWAY	22	0	0.630841230277534	1
iPSC-CVPC	Arteria	c5.bp	GO_POSITIVE_REGULATION_OF_PROTEIN_LOCALIZATION_TO_CELL_SURFACE	http://www.gsea-msigdb.org/gsea/msigdb/cards/GO_POSITIVE_REGULATION_OF_PROTEIN_LOCALIZATION_TO_CELL_SURFACE	14	0	1	1
Heart	Arteria	c5.bp	GO_REGULATION_OF_HORMONE_LEVELS	http://www.gsea-msigdb.org/gsea/msigdb/cards/GO_REGULATION_OF_HORMONE_LEVELS	234	0.865092666058589	1	1
iPSC-CVPC	Heart	c5.bp	GO_NEGATIVE_REGULATION_OF_PEPTIDE_SECRETION	http://www.gsea-msigdb.org/gsea/msigdb/cards/GO_NEGATIVE_REGULATION_OF_PEPTIDE_SECRETION	63	0.464594300546749	0.724961006924943	1
iPSC-CVPC	Arteria	c5.bp	GO_NEGATIVE_REGULATION_OF_PEPTIDE_SECRETION	http://www.gsea-msigdb.org/gsea/msigdb/cards/GO_NEGATIVE_REGULATION_OF_PEPTIDE_SECRETION	63	0.275919609097271	0.262868207799241	1
iPSC-CVPC	Heart	c5.bp	GO_REGULATION_OF_PROTEIN_EXPORT_FROM_NUCLEUS	http://www.gsea-msigdb.org/gsea/msigdb/cards/GO_REGULATION_OF_PROTEIN_EXPORT_FROM_NUCLEUS	27	0	1	1
iPSC-CVPC	Arteria	c5.bp	GO_REGULATION_OF_PROTEIN_EXPORT_FROM_NUCLEUS	http://www.gsea-msigdb.org/gsea/msigdb/cards/GO_REGULATION_OF_PROTEIN_EXPORT_FROM_NUCLEUS	27	2.15349421196528	0.183428097561974	1
iPSC-CVPC	Heart	c5.bp	GO_LAYER_FORMATION_IN_CEREBRAL_CORTEX	http://www.gsea-msigdb.org/gsea/msigdb/cards/GO_LAYER_FORMATION_IN_CEREBRAL_CORTEX	8	0	1	1
iPSC-CVPC	Heart	c5.bp	GO_SEX_DETERMINATION	http://www.gsea-msigdb.org/gsea/msigdb/cards/GO_SEX_DETERMINATION	9	0	1	1
iPSC-CVPC	Arteria	c5.bp	GO_SEX_DETERMINATION	http://www.gsea-msigdb.org/gsea/msigdb/cards/GO_SEX_DETERMINATION	9	0	1	1
Heart	Arteria	c5.bp	GO_SEX_DETERMINATION	http://www.gsea-msigdb.org/gsea/msigdb/cards/GO_SEX_DETERMINATION	9	0	1	1
iPSC-CVPC	Heart	c5.bp	GO_PROTEASOME_ASSEMBLY	http://www.gsea-msigdb.org/gsea/msigdb/cards/GO_PROTEASOME_ASSEMBLY	10	0	1	1
iPSC-CVPC	Arteria	c5.bp	GO_PROTEASOME_ASSEMBLY	http://www.gsea-msigdb.org/gsea/msigdb/cards/GO_PROTEASOME_ASSEMBLY	10	0	1	1
iPSC-CVPC	Heart	c5.bp	GO_ESTABLISHMENT_OF_PROTEIN_LOCALIZATION_TO_ENDOPLASMIC_RETICULUM	http://www.gsea-msigdb.org/gsea/msigdb/cards/GO_ESTABLISHMENT_OF_PROTEIN_LOCALIZATION_TO_ENDOPLASMIC_RETICULUM	41	3.14737605202833	0.0471869828300433	1
iPSC-CVPC	Arteria	c5.bp	GO_ESTABLISHMENT_OF_PROTEIN_LOCALIZATION_TO_ENDOPLASMIC_RETICULUM	http://www.gsea-msigdb.org/gsea/msigdb/cards/GO_ESTABLISHMENT_OF_PROTEIN_LOCALIZATION_TO_ENDOPLASMIC_RETICULUM	41	1.86338162809906	0.284797392924415	1
iPSC-CVPC	Arteria	c5.bp	GO_THYMUS_DEVELOPMENT	http://www.gsea-msigdb.org/gsea/msigdb/cards/GO_THYMUS_DEVELOPMENT	27	0.660290068265155	1	1
Heart	Arteria	c5.bp	GO_THYMUS_DEVELOPMENT	http://www.gsea-msigdb.org/gsea/msigdb/cards/GO_THYMUS_DEVELOPMENT	27	0	1	1
iPSC-CVPC	Heart	c5.bp	GO_HOMEOSTATIC_PROCESS	http://www.gsea-msigdb.org/gsea/msigdb/cards/GO_HOMEOSTATIC_PROCESS	1015	1.28026801368678	0.141872562978403	1
iPSC-CVPC	Arteria	c5.bp	GO_HOMEOSTATIC_PROCESS	http://www.gsea-msigdb.org/gsea/msigdb/cards/GO_HOMEOSTATIC_PROCESS	1015	0.900353780132499	0.515526528214453	1
iPSC-CVPC	Heart	c5.bp	GO_POSITIVE_REGULATION_OF_CYTOPLASMIC_TRANSPORT	http://www.gsea-msigdb.org/gsea/msigdb/cards/GO_POSITIVE_REGULATION_OF_CYTOPLASMIC_TRANSPORT	11	0	1	1
iPSC-CVPC	Arteria	c5.bp	GO_POSITIVE_REGULATION_OF_CYTOPLASMIC_TRANSPORT	http://www.gsea-msigdb.org/gsea/msigdb/cards/GO_POSITIVE_REGULATION_OF_CYTOPLASMIC_TRANSPORT	11	0	1	1
Heart	Arteria	c5.bp	GO_POSITIVE_REGULATION_OF_CYTOPLASMIC_TRANSPORT	http://www.gsea-msigdb.org/gsea/msigdb/cards/GO_POSITIVE_REGULATION_OF_CYTOPLASMIC_TRANSPORT	11	0	1	1
iPSC-CVPC	Heart	c5.bp	GO_SENSORY_PERCEPTION_OF_CHEMICAL_STIMULUS	http://www.gsea-msigdb.org/gsea/msigdb/cards/GO_SENSORY_PERCEPTION_OF_CHEMICAL_STIMULUS	16	0	1	1
iPSC-CVPC	Arteria	c5.bp	GO_SENSORY_PERCEPTION_OF_CHEMICAL_STIMULUS	http://www.gsea-msigdb.org/gsea/msigdb/cards/GO_SENSORY_PERCEPTION_OF_CHEMICAL_STIMULUS	16	2.4592658079527	0.218782451110804	1
Heart	Arteria	c5.bp	GO_SENSORY_PERCEPTION_OF_CHEMICAL_STIMULUS	http://www.gsea-msigdb.org/gsea/msigdb/cards/GO_SENSORY_PERCEPTION_OF_CHEMICAL_STIMULUS	16	6.76122169387861	0.146404413949137	1
iPSC-CVPC	Heart	c5.bp	GO_CELLULAR_PIGMENTATION	http://www.gsea-msigdb.org/gsea/msigdb/cards/GO_CELLULAR_PIGMENTATION	33	0	0.627870388797415	1
iPSC-CVPC	Heart	c5.bp	GO_NEGATIVE_REGULATION_OF_CELL_CELL_ADHESION	http://www.gsea-msigdb.org/gsea/msigdb/cards/GO_NEGATIVE_REGULATION_OF_CELL_CELL_ADHESION	96	0.302237980949342	0.381909129676452	1
iPSC-CVPC	Arteria	c5.bp	GO_NEGATIVE_REGULATION_OF_CELL_CELL_ADHESION	http://www.gsea-msigdb.org/gsea/msigdb/cards/GO_NEGATIVE_REGULATION_OF_CELL_CELL_ADHESION	96	0.943605434597404	1	1
iPSC-CVPC	Arteria	c5.bp	GO_POSITIVE_REGULATION_OF_LYASE_ACTIVITY	http://www.gsea-msigdb.org/gsea/msigdb/cards/GO_POSITIVE_REGULATION_OF_LYASE_ACTIVITY	7	6.88959566708754	0.0527411214668516	1
Heart	Arteria	c5.bp	GO_POSITIVE_REGULATION_OF_LYASE_ACTIVITY	http://www.gsea-msigdb.org/gsea/msigdb/cards/GO_POSITIVE_REGULATION_OF_LYASE_ACTIVITY	7	0	1	1
iPSC-CVPC	Heart	c5.bp	GO_REGULATION_OF_LIGASE_ACTIVITY	http://www.gsea-msigdb.org/gsea/msigdb/cards/GO_REGULATION_OF_LIGASE_ACTIVITY	7	0	1	1
iPSC-CVPC	Arteria	c5.bp	GO_REGULATION_OF_LIGASE_ACTIVITY	http://www.gsea-msigdb.org/gsea/msigdb/cards/GO_REGULATION_OF_LIGASE_ACTIVITY	7	2.86643075245736	0.32705832013432	1
Heart	Arteria	c5.bp	GO_REGULATION_OF_LIGASE_ACTIVITY	http://www.gsea-msigdb.org/gsea/msigdb/cards/GO_REGULATION_OF_LIGASE_ACTIVITY	7	0	1	1
iPSC-CVPC	Heart	c5.bp	GO_SULFATE_TRANSPORT	http://www.gsea-msigdb.org/gsea/msigdb/cards/GO_SULFATE_TRANSPORT	5	0	1	1
iPSC-CVPC	Arteria	c5.bp	GO_SULFATE_TRANSPORT	http://www.gsea-msigdb.org/gsea/msigdb/cards/GO_SULFATE_TRANSPORT	5	0	1	1
iPSC-CVPC	Heart	c5.bp	GO_IMMUNE_SYSTEM_DEVELOPMENT	http://www.gsea-msigdb.org/gsea/msigdb/cards/GO_IMMUNE_SYSTEM_DEVELOPMENT	554	1.20774137281174	0.394525868970518	1
iPSC-CVPC	Arteria	c5.bp	GO_IMMUNE_SYSTEM_DEVELOPMENT	http://www.gsea-msigdb.org/gsea/msigdb/cards/GO_IMMUNE_SYSTEM_DEVELOPMENT	554	0.946474696412909	0.848460272392857	1
iPSC-CVPC	Heart	c5.bp	GO_ALPHA_AMINO_ACID_CATABOLIC_PROCESS	http://www.gsea-msigdb.org/gsea/msigdb/cards/GO_ALPHA_AMINO_ACID_CATABOLIC_PROCESS	52	0	0.421537626910012	1
iPSC-CVPC	Arteria	c5.bp	GO_ALPHA_AMINO_ACID_CATABOLIC_PROCESS	http://www.gsea-msigdb.org/gsea/msigdb/cards/GO_ALPHA_AMINO_ACID_CATABOLIC_PROCESS	52	1.05225987603499	0.762677899653385	1
iPSC-CVPC	Heart	c5.bp	GO_REGULATION_OF_VOLTAGE_GATED_CALCIUM_CHANNEL_ACTIVITY	http://www.gsea-msigdb.org/gsea/msigdb/cards/GO_REGULATION_OF_VOLTAGE_GATED_CALCIUM_CHANNEL_ACTIVITY	19	1.60694629932077	0.476362698078548	1
iPSC-CVPC	Arteria	c5.bp	GO_REGULATION_OF_VOLTAGE_GATED_CALCIUM_CHANNEL_ACTIVITY	http://www.gsea-msigdb.org/gsea/msigdb/cards/GO_REGULATION_OF_VOLTAGE_GATED_CALCIUM_CHANNEL_ACTIVITY	19	0	0.622201972793475	1
Heart	Arteria	c5.bp	GO_PH_REDUCTION	http://www.gsea-msigdb.org/gsea/msigdb/cards/GO_PH_REDUCTION	26	0	1	1
iPSC-CVPC	Heart	c5.bp	GO_NEGATIVE_REGULATION_BY_HOST_OF_VIRAL_TRANSCRIPTION	http://www.gsea-msigdb.org/gsea/msigdb/cards/GO_NEGATIVE_REGULATION_BY_HOST_OF_VIRAL_TRANSCRIPTION	11	6.44915592882432	0.0502662430282039	1
iPSC-CVPC	Arteria	c5.bp	GO_NEGATIVE_REGULATION_BY_HOST_OF_VIRAL_TRANSCRIPTION	http://www.gsea-msigdb.org/gsea/msigdb/cards/GO_NEGATIVE_REGULATION_BY_HOST_OF_VIRAL_TRANSCRIPTION	11	0	1	1
iPSC-CVPC	Heart	c5.bp	GO_MAMMARY_GLAND_EPITHELIAL_CELL_DIFFERENTIATION	http://www.gsea-msigdb.org/gsea/msigdb/cards/GO_MAMMARY_GLAND_EPITHELIAL_CELL_DIFFERENTIATION	9	0	1	1
iPSC-CVPC	Heart	c5.bp	GO_CELLULAR_RESPONSE_TO_GAMMA_RADIATION	http://www.gsea-msigdb.org/gsea/msigdb/cards/GO_CELLULAR_RESPONSE_TO_GAMMA_RADIATION	20	0	1	1
iPSC-CVPC	Arteria	c5.bp	GO_CELLULAR_RESPONSE_TO_GAMMA_RADIATION	http://www.gsea-msigdb.org/gsea/msigdb/cards/GO_CELLULAR_RESPONSE_TO_GAMMA_RADIATION	20	0.904174230095951	1	1
iPSC-CVPC	Heart	c5.bp	GO_EXTRINSIC_APOPTOTIC_SIGNALING_PATHWAY	http://www.gsea-msigdb.org/gsea/msigdb/cards/GO_EXTRINSIC_APOPTOTIC_SIGNALING_PATHWAY	139	0.854569309328514	1	1
iPSC-CVPC	Arteria	c5.bp	GO_EXTRINSIC_APOPTOTIC_SIGNALING_PATHWAY	http://www.gsea-msigdb.org/gsea/msigdb/cards/GO_EXTRINSIC_APOPTOTIC_SIGNALING_PATHWAY	139	0.375853916563066	0.0904720383317227	1
iPSC-CVPC	Arteria	c5.bp	GO_REGULATION_OF_TRANSLATIONAL_ELONGATION	http://www.gsea-msigdb.org/gsea/msigdb/cards/GO_REGULATION_OF_TRANSLATIONAL_ELONGATION	15	1.22766633681219	0.572202813746029	1
Heart	Arteria	c5.bp	GO_REGULATION_OF_TRANSLATIONAL_ELONGATION	http://www.gsea-msigdb.org/gsea/msigdb/cards/GO_REGULATION_OF_TRANSLATIONAL_ELONGATION	15	0	1	1
iPSC-CVPC	Arteria	c5.bp	GO_GAMMA_AMINOBUTYRIC_ACID_SIGNALING_PATHWAY	http://www.gsea-msigdb.org/gsea/msigdb/cards/GO_GAMMA_AMINOBUTYRIC_ACID_SIGNALING_PATHWAY	6	3.43989946228232	0.28787014889611	1
Heart	Arteria	c5.bp	GO_GAMMA_AMINOBUTYRIC_ACID_SIGNALING_PATHWAY	http://www.gsea-msigdb.org/gsea/msigdb/cards/GO_GAMMA_AMINOBUTYRIC_ACID_SIGNALING_PATHWAY	6	0	1	1
iPSC-CVPC	Heart	c5.bp	GO_POSITIVE_REGULATION_OF_STEROL_TRANSPORT	http://www.gsea-msigdb.org/gsea/msigdb/cards/GO_POSITIVE_REGULATION_OF_STEROL_TRANSPORT	16	1.92888173685684	0.419999940957385	1
iPSC-CVPC	Heart	c5.bp	GO_MODIFICATION_OF_MORPHOLOGY_OR_PHYSIOLOGY_OF_OTHER_ORGANISM	http://www.gsea-msigdb.org/gsea/msigdb/cards/GO_MODIFICATION_OF_MORPHOLOGY_OR_PHYSIOLOGY_OF_OTHER_ORGANISM	76	2.50162413507144	0.0414029207321493	1
iPSC-CVPC	Arteria	c5.bp	GO_MODIFICATION_OF_MORPHOLOGY_OR_PHYSIOLOGY_OF_OTHER_ORGANISM	http://www.gsea-msigdb.org/gsea/msigdb/cards/GO_MODIFICATION_OF_MORPHOLOGY_OR_PHYSIOLOGY_OF_OTHER_ORGANISM	76	0.954263273462525	1	1
iPSC-CVPC	Heart	c5.bp	GO_HYPEROSMOTIC_RESPONSE	http://www.gsea-msigdb.org/gsea/msigdb/cards/GO_HYPEROSMOTIC_RESPONSE	16	1.92888173685684	0.419999940957385	1
iPSC-CVPC	Arteria	c5.bp	GO_HYPEROSMOTIC_RESPONSE	http://www.gsea-msigdb.org/gsea/msigdb/cards/GO_HYPEROSMOTIC_RESPONSE	16	1.14571734678302	0.595764171255043	1
Heart	Arteria	c5.bp	GO_HYPEROSMOTIC_RESPONSE	http://www.gsea-msigdb.org/gsea/msigdb/cards/GO_HYPEROSMOTIC_RESPONSE	16	0	1	1
iPSC-CVPC	Heart	c5.bp	GO_NEGATIVE_REGULATION_OF_NATURAL_KILLER_CELL_MEDIATED_IMMUNITY	http://www.gsea-msigdb.org/gsea/msigdb/cards/GO_NEGATIVE_REGULATION_OF_NATURAL_KILLER_CELL_MEDIATED_IMMUNITY	6	0	1	1
iPSC-CVPC	Arteria	c5.bp	GO_NEGATIVE_REGULATION_OF_NATURAL_KILLER_CELL_MEDIATED_IMMUNITY	http://www.gsea-msigdb.org/gsea/msigdb/cards/GO_NEGATIVE_REGULATION_OF_NATURAL_KILLER_CELL_MEDIATED_IMMUNITY	6	3.43989946228232	0.28787014889611	1
iPSC-CVPC	Arteria	c5.bp	GO_NEGATIVE_REGULATION_OF_DENDRITE_MORPHOGENESIS	http://www.gsea-msigdb.org/gsea/msigdb/cards/GO_NEGATIVE_REGULATION_OF_DENDRITE_MORPHOGENESIS	9	0	1	1
iPSC-CVPC	Heart	c5.bp	GO_EXTRACELLULAR_MATRIX_ASSEMBLY	http://www.gsea-msigdb.org/gsea/msigdb/cards/GO_EXTRACELLULAR_MATRIX_ASSEMBLY	25	1.20456327569562	0.573226453847344	1
iPSC-CVPC	Arteria	c5.bp	GO_EXTRACELLULAR_MATRIX_ASSEMBLY	http://www.gsea-msigdb.org/gsea/msigdb/cards/GO_EXTRACELLULAR_MATRIX_ASSEMBLY	25	0	0.398639067359989	1
Heart	Arteria	c5.bp	GO_REGULATION_OF_BROWN_FAT_CELL_DIFFERENTIATION	http://www.gsea-msigdb.org/gsea/msigdb/cards/GO_REGULATION_OF_BROWN_FAT_CELL_DIFFERENTIATION	10	0	1	1
iPSC-CVPC	Heart	c5.bp	GO_LONG_CHAIN_FATTY_ACID_METABOLIC_PROCESS	http://www.gsea-msigdb.org/gsea/msigdb/cards/GO_LONG_CHAIN_FATTY_ACID_METABOLIC_PROCESS	54	1.11201367705123	0.70221269525528	1
iPSC-CVPC	Arteria	c5.bp	GO_LONG_CHAIN_FATTY_ACID_METABOLIC_PROCESS	http://www.gsea-msigdb.org/gsea/msigdb/cards/GO_LONG_CHAIN_FATTY_ACID_METABOLIC_PROCESS	54	1.37709270040982	0.540253360550226	1
iPSC-CVPC	Heart	c5.bp	GO_MONOVALENT_INORGANIC_CATION_TRANSPORT	http://www.gsea-msigdb.org/gsea/msigdb/cards/GO_MONOVALENT_INORGANIC_CATION_TRANSPORT	207	1.16534926067374	0.693382763697996	1
iPSC-CVPC	Arteria	c5.bp	GO_MONOVALENT_INORGANIC_CATION_TRANSPORT	http://www.gsea-msigdb.org/gsea/msigdb/cards/GO_MONOVALENT_INORGANIC_CATION_TRANSPORT	207	1.35129166267177	0.278136183017359	1
Heart	Arteria	c5.bp	GO_RELAXATION_OF_CARDIAC_MUSCLE	http://www.gsea-msigdb.org/gsea/msigdb/cards/GO_RELAXATION_OF_CARDIAC_MUSCLE	10	11.2727384927875	0.0941740714908517	1
Heart	Arteria	c5.bp	GO_POSITIVE_REGULATION_OF_BEHAVIOR	http://www.gsea-msigdb.org/gsea/msigdb/cards/GO_POSITIVE_REGULATION_OF_BEHAVIOR	9	0	1	1
Heart	Arteria	c5.bp	GO_CALCIUM_MEDIATED_SIGNALING_USING_INTRACELLULAR_CALCIUM_SOURCE	http://www.gsea-msigdb.org/gsea/msigdb/cards/GO_CALCIUM_MEDIATED_SIGNALING_USING_INTRACELLULAR_CALCIUM_SOURCE	15	0	1	1
Heart	Arteria	c5.bp	GO_MULTICELLULAR_ORGANISMAL_MOVEMENT	http://www.gsea-msigdb.org/gsea/msigdb/cards/GO_MULTICELLULAR_ORGANISMAL_MOVEMENT	34	3.06899186854922	0.285854423161359	1
iPSC-CVPC	Heart	c5.bp	GO_DNA_INTEGRATION	http://www.gsea-msigdb.org/gsea/msigdb/cards/GO_DNA_INTEGRATION	5	0	1	1
iPSC-CVPC	Arteria	c5.bp	GO_DNA_INTEGRATION	http://www.gsea-msigdb.org/gsea/msigdb/cards/GO_DNA_INTEGRATION	5	4.30013123953848	0.246404002422746	1
Heart	Arteria	c5.bp	GO_REGULATION_OF_MYELINATION	http://www.gsea-msigdb.org/gsea/msigdb/cards/GO_REGULATION_OF_MYELINATION	29	0	1	1
iPSC-CVPC	Heart	c5.bp	GO_REGULATION_OF_AXON_GUIDANCE	http://www.gsea-msigdb.org/gsea/msigdb/cards/GO_REGULATION_OF_AXON_GUIDANCE	30	0	0.62534481433129	1
iPSC-CVPC	Arteria	c5.bp	GO_REGULATION_OF_AXON_GUIDANCE	http://www.gsea-msigdb.org/gsea/msigdb/cards/GO_REGULATION_OF_AXON_GUIDANCE	30	0	0.409551880321668	1
Heart	Arteria	c5.bp	GO_REGULATION_OF_AXON_GUIDANCE	http://www.gsea-msigdb.org/gsea/msigdb/cards/GO_REGULATION_OF_AXON_GUIDANCE	30	0	1	1
Heart	Arteria	c5.bp	GO_RESPONSE_TO_COPPER_ION	http://www.gsea-msigdb.org/gsea/msigdb/cards/GO_RESPONSE_TO_COPPER_ION	16	0	1	1
iPSC-CVPC	Arteria	c5.bp	GO_NEGATIVE_REGULATION_OF_CELLULAR_PROTEIN_CATABOLIC_PROCESS	http://www.gsea-msigdb.org/gsea/msigdb/cards/GO_NEGATIVE_REGULATION_OF_CELLULAR_PROTEIN_CATABOLIC_PROCESS	48	1.56578129663847	0.335952987199387	1
iPSC-CVPC	Heart	c5.bp	GO_RESPONSE_TO_AXON_INJURY	http://www.gsea-msigdb.org/gsea/msigdb/cards/GO_RESPONSE_TO_AXON_INJURY	41	1.48448631423338	0.400675489357123	1
iPSC-CVPC	Arteria	c5.bp	GO_RESPONSE_TO_AXON_INJURY	http://www.gsea-msigdb.org/gsea/msigdb/cards/GO_RESPONSE_TO_AXON_INJURY	41	1.35827161151673	0.491870274887391	1
iPSC-CVPC	Heart	c5.bp	GO_REGULATION_OF_VACUOLE_ORGANIZATION	http://www.gsea-msigdb.org/gsea/msigdb/cards/GO_REGULATION_OF_VACUOLE_ORGANIZATION	29	1.03211027703323	1	1
iPSC-CVPC	Arteria	c5.bp	GO_REGULATION_OF_VACUOLE_ORGANIZATION	http://www.gsea-msigdb.org/gsea/msigdb/cards/GO_REGULATION_OF_VACUOLE_ORGANIZATION	29	1.98745392537868	0.212089918523982	1
Heart	Arteria	c5.bp	GO_REGULATION_OF_VACUOLE_ORGANIZATION	http://www.gsea-msigdb.org/gsea/msigdb/cards/GO_REGULATION_OF_VACUOLE_ORGANIZATION	29	0	1	1
iPSC-CVPC	Arteria	c5.bp	GO_INTRACELLULAR_STEROID_HORMONE_RECEPTOR_SIGNALING_PATHWAY	http://www.gsea-msigdb.org/gsea/msigdb/cards/GO_INTRACELLULAR_STEROID_HORMONE_RECEPTOR_SIGNALING_PATHWAY	88	1.25986490242707	0.485355774470183	1
iPSC-CVPC	Heart	c5.bp	GO_REGULATION_OF_WNT_SIGNALING_PATHWAY	http://www.gsea-msigdb.org/gsea/msigdb/cards/GO_REGULATION_OF_WNT_SIGNALING_PATHWAY	230	0.905208971362771	1	1
iPSC-CVPC	Arteria	c5.bp	GO_REGULATION_OF_WNT_SIGNALING_PATHWAY	http://www.gsea-msigdb.org/gsea/msigdb/cards/GO_REGULATION_OF_WNT_SIGNALING_PATHWAY	230	1.11642507944655	0.660203284045451	1
iPSC-CVPC	Heart	c5.bp	GO_REGULATION_OF_CARDIAC_MUSCLE_CELL_DIFFERENTIATION	http://www.gsea-msigdb.org/gsea/msigdb/cards/GO_REGULATION_OF_CARDIAC_MUSCLE_CELL_DIFFERENTIATION	23	0	1	1
iPSC-CVPC	Arteria	c5.bp	GO_REGULATION_OF_CARDIAC_MUSCLE_CELL_DIFFERENTIATION	http://www.gsea-msigdb.org/gsea/msigdb/cards/GO_REGULATION_OF_CARDIAC_MUSCLE_CELL_DIFFERENTIATION	23	1.63847645086098	0.363434281447563	1
iPSC-CVPC	Arteria	c5.bp	GO_POSITIVE_REGULATION_OF_DIGESTIVE_SYSTEM_PROCESS	http://www.gsea-msigdb.org/gsea/msigdb/cards/GO_POSITIVE_REGULATION_OF_DIGESTIVE_SYSTEM_PROCESS	5	0	1	1
Heart	Arteria	c5.bp	GO_POSITIVE_REGULATION_OF_DIGESTIVE_SYSTEM_PROCESS	http://www.gsea-msigdb.org/gsea/msigdb/cards/GO_POSITIVE_REGULATION_OF_DIGESTIVE_SYSTEM_PROCESS	5	0	1	1
iPSC-CVPC	Heart	c5.bp	GO_TETRAPYRROLE_BIOSYNTHETIC_PROCESS	http://www.gsea-msigdb.org/gsea/msigdb/cards/GO_TETRAPYRROLE_BIOSYNTHETIC_PROCESS	20	1.52222000786147	0.493909020284852	1
iPSC-CVPC	Heart	c5.bp	GO_DETECTION_OF_OTHER_ORGANISM	http://www.gsea-msigdb.org/gsea/msigdb/cards/GO_DETECTION_OF_OTHER_ORGANISM	5	0	1	1
iPSC-CVPC	Arteria	c5.bp	GO_DETECTION_OF_OTHER_ORGANISM	http://www.gsea-msigdb.org/gsea/msigdb/cards/GO_DETECTION_OF_OTHER_ORGANISM	5	11.4834796538569	0.027022505409332	1
iPSC-CVPC	Heart	c5.bp	GO_G_PROTEIN_COUPLED_GLUTAMATE_RECEPTOR_SIGNALING_PATHWAY	http://www.gsea-msigdb.org/gsea/msigdb/cards/GO_G_PROTEIN_COUPLED_GLUTAMATE_RECEPTOR_SIGNALING_PATHWAY	5	0	1	1
iPSC-CVPC	Arteria	c5.bp	GO_G_PROTEIN_COUPLED_GLUTAMATE_RECEPTOR_SIGNALING_PATHWAY	http://www.gsea-msigdb.org/gsea/msigdb/cards/GO_G_PROTEIN_COUPLED_GLUTAMATE_RECEPTOR_SIGNALING_PATHWAY	5	0	1	1
Heart	Arteria	c5.bp	GO_FORELIMB_MORPHOGENESIS	http://www.gsea-msigdb.org/gsea/msigdb/cards/GO_FORELIMB_MORPHOGENESIS	19	0	1	1
iPSC-CVPC	Arteria	c5.bp	GO_ASPARTATE_FAMILY_AMINO_ACID_BIOSYNTHETIC_PROCESS	http://www.gsea-msigdb.org/gsea/msigdb/cards/GO_ASPARTATE_FAMILY_AMINO_ACID_BIOSYNTHETIC_PROCESS	18	2.15155712884977	0.260327334016662	1
Heart	Arteria	c5.bp	GO_ASPARTATE_FAMILY_AMINO_ACID_BIOSYNTHETIC_PROCESS	http://www.gsea-msigdb.org/gsea/msigdb/cards/GO_ASPARTATE_FAMILY_AMINO_ACID_BIOSYNTHETIC_PROCESS	18	0	1	1
Heart	Arteria	c5.bp	GO_POSITIVE_REGULATION_OF_HISTONE_H3_K4_METHYLATION	http://www.gsea-msigdb.org/gsea/msigdb/cards/GO_POSITIVE_REGULATION_OF_HISTONE_H3_K4_METHYLATION	11	0	1	1
iPSC-CVPC	Heart	c5.bp	GO_MICROTUBULE_NUCLEATION	http://www.gsea-msigdb.org/gsea/msigdb/cards/GO_MICROTUBULE_NUCLEATION	22	1.37700733198433	0.527262127022268	1
iPSC-CVPC	Heart	c5.bp	GO_ESTABLISHMENT_OF_PROTEIN_LOCALIZATION_TO_ORGANELLE	http://www.gsea-msigdb.org/gsea/msigdb/cards/GO_ESTABLISHMENT_OF_PROTEIN_LOCALIZATION_TO_ORGANELLE	330	1.19199382461577	0.531803967274537	1
iPSC-CVPC	Arteria	c5.bp	GO_ESTABLISHMENT_OF_PROTEIN_LOCALIZATION_TO_ORGANELLE	http://www.gsea-msigdb.org/gsea/msigdb/cards/GO_ESTABLISHMENT_OF_PROTEIN_LOCALIZATION_TO_ORGANELLE	330	1.23612862745102	0.326490708032367	1
Heart	Arteria	c5.bp	GO_MYD88_DEPENDENT_TOLL_LIKE_RECEPTOR_SIGNALING_PATHWAY	http://www.gsea-msigdb.org/gsea/msigdb/cards/GO_MYD88_DEPENDENT_TOLL_LIKE_RECEPTOR_SIGNALING_PATHWAY	24	4.4071698002074	0.211431663001473	1
iPSC-CVPC	Arteria	c5.bp	GO_REGULATION_OF_PROTEIN_POLYMERIZATION	http://www.gsea-msigdb.org/gsea/msigdb/cards/GO_REGULATION_OF_PROTEIN_POLYMERIZATION	129	1.77806807456636	0.0755606905186672	1
iPSC-CVPC	Heart	c5.bp	GO_REGULATION_OF_PROTEIN_TARGETING_TO_MEMBRANE	http://www.gsea-msigdb.org/gsea/msigdb/cards/GO_REGULATION_OF_PROTEIN_TARGETING_TO_MEMBRANE	27	1.11169901971168	0.601365256044616	1
iPSC-CVPC	Arteria	c5.bp	GO_REGULATION_OF_PROTEIN_TARGETING_TO_MEMBRANE	http://www.gsea-msigdb.org/gsea/msigdb/cards/GO_REGULATION_OF_PROTEIN_TARGETING_TO_MEMBRANE	27	1.37580322124879	0.65861259116579	1
iPSC-CVPC	Heart	c5.bp	GO_HISTONE_H2A_UBIQUITINATION	http://www.gsea-msigdb.org/gsea/msigdb/cards/GO_HISTONE_H2A_UBIQUITINATION	18	0	1	1
iPSC-CVPC	Arteria	c5.bp	GO_HISTONE_H2A_UBIQUITINATION	http://www.gsea-msigdb.org/gsea/msigdb/cards/GO_HISTONE_H2A_UBIQUITINATION	18	1.01074094004007	1	1
iPSC-CVPC	Arteria	c5.bp	GO_DNA_DEALKYLATION	http://www.gsea-msigdb.org/gsea/msigdb/cards/GO_DNA_DEALKYLATION	19	0	0.622201972793475	1
iPSC-CVPC	Heart	c5.bp	GO_ACTIN_FILAMENT_BASED_MOVEMENT	http://www.gsea-msigdb.org/gsea/msigdb/cards/GO_ACTIN_FILAMENT_BASED_MOVEMENT	91	1.68956659829649	0.233249351034531	1
iPSC-CVPC	Arteria	c5.bp	GO_POSITIVE_REGULATION_OF_EPITHELIAL_CELL_PROLIFERATION	http://www.gsea-msigdb.org/gsea/msigdb/cards/GO_POSITIVE_REGULATION_OF_EPITHELIAL_CELL_PROLIFERATION	106	0.849332819516609	1	1
iPSC-CVPC	Heart	c5.bp	GO_ACETYL_COA_METABOLIC_PROCESS	http://www.gsea-msigdb.org/gsea/msigdb/cards/GO_ACETYL_COA_METABOLIC_PROCESS	26	3.79198416066391	0.0546572528482803	1
iPSC-CVPC	Arteria	c5.bp	GO_ACETYL_COA_METABOLIC_PROCESS	http://www.gsea-msigdb.org/gsea/msigdb/cards/GO_ACETYL_COA_METABOLIC_PROCESS	26	1.43325964912756	0.652109004375886	1
Heart	Arteria	c5.bp	GO_CREATINE_METABOLIC_PROCESS	http://www.gsea-msigdb.org/gsea/msigdb/cards/GO_CREATINE_METABOLIC_PROCESS	4	0	1	1
iPSC-CVPC	Arteria	c5.bp	GO_POSITIVE_REGULATION_OF_MACROPHAGE_DERIVED_FOAM_CELL_DIFFERENTIATION	http://www.gsea-msigdb.org/gsea/msigdb/cards/GO_POSITIVE_REGULATION_OF_MACROPHAGE_DERIVED_FOAM_CELL_DIFFERENTIATION	9	2.14962403857217	0.399093657395531	1
Heart	Arteria	c5.bp	GO_POSITIVE_REGULATION_OF_MACROPHAGE_DERIVED_FOAM_CELL_DIFFERENTIATION	http://www.gsea-msigdb.org/gsea/msigdb/cards/GO_POSITIVE_REGULATION_OF_MACROPHAGE_DERIVED_FOAM_CELL_DIFFERENTIATION	9	12.6798125169426	0.0851664265913859	1
Heart	Arteria	c5.bp	GO_REGULATION_OF_LAMELLIPODIUM_ASSEMBLY	http://www.gsea-msigdb.org/gsea/msigdb/cards/GO_REGULATION_OF_LAMELLIPODIUM_ASSEMBLY	15	7.24578962473044	0.137911327951284	1
Heart	Arteria	c5.bp	GO_CELLULAR_KETONE_METABOLIC_PROCESS	http://www.gsea-msigdb.org/gsea/msigdb/cards/GO_CELLULAR_KETONE_METABOLIC_PROCESS	135	2.32500452961795	0.147608344214655	1
iPSC-CVPC	Heart	c5.bp	GO_WNT_SIGNALING_PATHWAY_CALCIUM_MODULATING_PATHWAY	http://www.gsea-msigdb.org/gsea/msigdb/cards/GO_WNT_SIGNALING_PATHWAY_CALCIUM_MODULATING_PATHWAY	29	0	0.625301114270754	1
Heart	Arteria	c5.bp	GO_RESPONSE_TO_MURAMYL_DIPEPTIDE	http://www.gsea-msigdb.org/gsea/msigdb/cards/GO_RESPONSE_TO_MURAMYL_DIPEPTIDE	14	0	1	1
iPSC-CVPC	Heart	c5.bp	GO_REGULATION_OF_POSITIVE_CHEMOTAXIS	http://www.gsea-msigdb.org/gsea/msigdb/cards/GO_REGULATION_OF_POSITIVE_CHEMOTAXIS	17	1.80811024454217	0.4394294259042	1
iPSC-CVPC	Arteria	c5.bp	GO_REGULATION_OF_POSITIVE_CHEMOTAXIS	http://www.gsea-msigdb.org/gsea/msigdb/cards/GO_REGULATION_OF_POSITIVE_CHEMOTAXIS	17	0	1	1
iPSC-CVPC	Heart	c5.bp	GO_REGULATION_OF_IMMUNE_RESPONSE	http://www.gsea-msigdb.org/gsea/msigdb/cards/GO_REGULATION_OF_IMMUNE_RESPONSE	534	1.0698184051806	0.711934280514424	1
iPSC-CVPC	Arteria	c5.bp	GO_REGULATION_OF_IMMUNE_RESPONSE	http://www.gsea-msigdb.org/gsea/msigdb/cards/GO_REGULATION_OF_IMMUNE_RESPONSE	534	1.06225167818245	0.697667529987502	1
Heart	Arteria	c5.bp	GO_MEMBRANE_LIPID_CATABOLIC_PROCESS	http://www.gsea-msigdb.org/gsea/msigdb/cards/GO_MEMBRANE_LIPID_CATABOLIC_PROCESS	16	0	1	1
Heart	Arteria	c5.bp	GO_NEGATIVE_REGULATION_OF_INTRINSIC_APOPTOTIC_SIGNALING_PATHWAY_IN_RESPONSE_TO_DNA_DAMAGE	http://www.gsea-msigdb.org/gsea/msigdb/cards/GO_NEGATIVE_REGULATION_OF_INTRINSIC_APOPTOTIC_SIGNALING_PATHWAY_IN_RESPONSE_TO_DNA_DAMAGE	20	0	1	1
iPSC-CVPC	Heart	c5.bp	GO_NEGATIVE_REGULATION_OF_CELLULAR_AMIDE_METABOLIC_PROCESS	http://www.gsea-msigdb.org/gsea/msigdb/cards/GO_NEGATIVE_REGULATION_OF_CELLULAR_AMIDE_METABOLIC_PROCESS	96	0.612664998382708	0.773100778043528	1
iPSC-CVPC	Arteria	c5.bp	GO_NEGATIVE_REGULATION_OF_CELLULAR_AMIDE_METABOLIC_PROCESS	http://www.gsea-msigdb.org/gsea/msigdb/cards/GO_NEGATIVE_REGULATION_OF_CELLULAR_AMIDE_METABOLIC_PROCESS	96	1.14697141523348	0.653179159148042	1
Heart	Arteria	c5.bp	GO_NEGATIVE_REGULATION_OF_CELLULAR_AMIDE_METABOLIC_PROCESS	http://www.gsea-msigdb.org/gsea/msigdb/cards/GO_NEGATIVE_REGULATION_OF_CELLULAR_AMIDE_METABOLIC_PROCESS	96	2.1634236813327	0.24359609698057	1
iPSC-CVPC	Heart	c5.bp	GO_POSITIVE_REGULATION_OF_HORMONE_METABOLIC_PROCESS	http://www.gsea-msigdb.org/gsea/msigdb/cards/GO_POSITIVE_REGULATION_OF_HORMONE_METABOLIC_PROCESS	6	0	1	1
iPSC-CVPC	Arteria	c5.bp	GO_POSITIVE_REGULATION_OF_HORMONE_METABOLIC_PROCESS	http://www.gsea-msigdb.org/gsea/msigdb/cards/GO_POSITIVE_REGULATION_OF_HORMONE_METABOLIC_PROCESS	6	0	1	1
Heart	Arteria	c5.bp	GO_TONGUE_DEVELOPMENT	http://www.gsea-msigdb.org/gsea/msigdb/cards/GO_TONGUE_DEVELOPMENT	9	0	1	1
iPSC-CVPC	Heart	c5.bp	GO_UV_PROTECTION	http://www.gsea-msigdb.org/gsea/msigdb/cards/GO_UV_PROTECTION	9	0	1	1
iPSC-CVPC	Arteria	c5.bp	GO_UV_PROTECTION	http://www.gsea-msigdb.org/gsea/msigdb/cards/GO_UV_PROTECTION	9	2.14962403857217	0.399093657395531	1
iPSC-CVPC	Heart	c5.bp	GO_PHOSPHATIDYLGLYCEROL_METABOLIC_PROCESS	http://www.gsea-msigdb.org/gsea/msigdb/cards/GO_PHOSPHATIDYLGLYCEROL_METABOLIC_PROCESS	16	4.14459565832358	0.0983845310698573	1
iPSC-CVPC	Arteria	c5.bp	GO_PHOSPHATIDYLGLYCEROL_METABOLIC_PROCESS	http://www.gsea-msigdb.org/gsea/msigdb/cards/GO_PHOSPHATIDYLGLYCEROL_METABOLIC_PROCESS	16	0	1	1
Heart	Arteria	c5.bp	GO_PHOSPHATIDYLGLYCEROL_METABOLIC_PROCESS	http://www.gsea-msigdb.org/gsea/msigdb/cards/GO_PHOSPHATIDYLGLYCEROL_METABOLIC_PROCESS	16	0	1	1
iPSC-CVPC	Heart	c5.bp	GO_PYRIMIDINE_NUCLEOSIDE_BIOSYNTHETIC_PROCESS	http://www.gsea-msigdb.org/gsea/msigdb/cards/GO_PYRIMIDINE_NUCLEOSIDE_BIOSYNTHETIC_PROCESS	14	0	1	1
iPSC-CVPC	Arteria	c5.bp	GO_PYRIMIDINE_NUCLEOSIDE_BIOSYNTHETIC_PROCESS	http://www.gsea-msigdb.org/gsea/msigdb/cards/GO_PYRIMIDINE_NUCLEOSIDE_BIOSYNTHETIC_PROCESS	14	1.32222215691555	0.547270630631346	1
Heart	Arteria	c5.bp	GO_TRANSLATIONAL_TERMINATION	http://www.gsea-msigdb.org/gsea/msigdb/cards/GO_TRANSLATIONAL_TERMINATION	61	1.68385955399589	0.453813035084958	1
iPSC-CVPC	Heart	c5.bp	GO_ENDOCARDIAL_CUSHION_MORPHOGENESIS	http://www.gsea-msigdb.org/gsea/msigdb/cards/GO_ENDOCARDIAL_CUSHION_MORPHOGENESIS	22	0	1	1
iPSC-CVPC	Arteria	c5.bp	GO_INTERLEUKIN_1_PRODUCTION	http://www.gsea-msigdb.org/gsea/msigdb/cards/GO_INTERLEUKIN_1_PRODUCTION	48	0.746201765881869	1	1
Heart	Arteria	c5.bp	GO_MODULATION_BY_HOST_OF_VIRAL_PROCESS	http://www.gsea-msigdb.org/gsea/msigdb/cards/GO_MODULATION_BY_HOST_OF_VIRAL_PROCESS	19	5.63329901473291	0.171389572616744	1
iPSC-CVPC	Heart	c5.bp	GO_REGULATION_OF_MEMBRANE_LIPID_DISTRIBUTION	http://www.gsea-msigdb.org/gsea/msigdb/cards/GO_REGULATION_OF_MEMBRANE_LIPID_DISTRIBUTION	26	0	1	1
iPSC-CVPC	Arteria	c5.bp	GO_REGULATION_OF_MEMBRANE_LIPID_DISTRIBUTION	http://www.gsea-msigdb.org/gsea/msigdb/cards/GO_REGULATION_OF_MEMBRANE_LIPID_DISTRIBUTION	26	0.686769395472494	1	1
iPSC-CVPC	Arteria	c5.bp	GO_ORGANOPHOSPHATE_BIOSYNTHETIC_PROCESS	http://www.gsea-msigdb.org/gsea/msigdb/cards/GO_ORGANOPHOSPHATE_BIOSYNTHETIC_PROCESS	385	0.990963015226371	1	1
Heart	Arteria	c5.bp	GO_ORGANOPHOSPHATE_BIOSYNTHETIC_PROCESS	http://www.gsea-msigdb.org/gsea/msigdb/cards/GO_ORGANOPHOSPHATE_BIOSYNTHETIC_PROCESS	385	0.784276091992657	1	1
iPSC-CVPC	Heart	c5.bp	GO_REGULATION_OF_PROTEIN_GLYCOSYLATION	http://www.gsea-msigdb.org/gsea/msigdb/cards/GO_REGULATION_OF_PROTEIN_GLYCOSYLATION	8	4.13576608214195	0.238343513900963	1
iPSC-CVPC	Arteria	c5.bp	GO_REGULATION_OF_PROTEIN_GLYCOSYLATION	http://www.gsea-msigdb.org/gsea/msigdb/cards/GO_REGULATION_OF_PROTEIN_GLYCOSYLATION	8	2.45677597834622	0.36409345665046	1
Heart	Arteria	c5.bp	GO_REGULATION_OF_PROTEIN_GLYCOSYLATION	http://www.gsea-msigdb.org/gsea/msigdb/cards/GO_REGULATION_OF_PROTEIN_GLYCOSYLATION	8	0	1	1
iPSC-CVPC	Heart	c5.bp	GO_ORGANIC_ACID_BIOSYNTHETIC_PROCESS	http://www.gsea-msigdb.org/gsea/msigdb/cards/GO_ORGANIC_ACID_BIOSYNTHETIC_PROCESS	182	2.07569486113618	0.0211467482913733	1
iPSC-CVPC	Arteria	c5.bp	GO_ORGANIC_ACID_BIOSYNTHETIC_PROCESS	http://www.gsea-msigdb.org/gsea/msigdb/cards/GO_ORGANIC_ACID_BIOSYNTHETIC_PROCESS	182	0.89222983568195	0.870198376394407	1
iPSC-CVPC	Heart	c5.bp	GO_REGULATION_OF_CELLULAR_RESPONSE_TO_HEAT	http://www.gsea-msigdb.org/gsea/msigdb/cards/GO_REGULATION_OF_CELLULAR_RESPONSE_TO_HEAT	58	1.58094276909136	0.444984319857277	1
iPSC-CVPC	Arteria	c5.bp	GO_REGULATION_OF_CELLULAR_RESPONSE_TO_HEAT	http://www.gsea-msigdb.org/gsea/msigdb/cards/GO_REGULATION_OF_CELLULAR_RESPONSE_TO_HEAT	58	0.93689775855181	1	1
Heart	Arteria	c5.bp	GO_REGULATION_OF_CELLULAR_RESPONSE_TO_HEAT	http://www.gsea-msigdb.org/gsea/msigdb/cards/GO_REGULATION_OF_CELLULAR_RESPONSE_TO_HEAT	58	1.77297845029109	0.437277338477816	1
Heart	Arteria	c5.bp	GO_POSITIVE_REGULATION_OF_ACUTE_INFLAMMATORY_RESPONSE	http://www.gsea-msigdb.org/gsea/msigdb/cards/GO_POSITIVE_REGULATION_OF_ACUTE_INFLAMMATORY_RESPONSE	11	0	1	1
iPSC-CVPC	Heart	c5.bp	GO_CYCLIC_NUCLEOTIDE_CATABOLIC_PROCESS	http://www.gsea-msigdb.org/gsea/msigdb/cards/GO_CYCLIC_NUCLEOTIDE_CATABOLIC_PROCESS	11	0	1	1
iPSC-CVPC	Arteria	c5.bp	GO_CYCLIC_NUCLEOTIDE_CATABOLIC_PROCESS	http://www.gsea-msigdb.org/gsea/msigdb/cards/GO_CYCLIC_NUCLEOTIDE_CATABOLIC_PROCESS	11	1.71933654701835	0.463429663316942	1
Heart	Arteria	c5.bp	GO_CYCLIC_NUCLEOTIDE_CATABOLIC_PROCESS	http://www.gsea-msigdb.org/gsea/msigdb/cards/GO_CYCLIC_NUCLEOTIDE_CATABOLIC_PROCESS	11	0	1	1
iPSC-CVPC	Arteria	c5.bp	GO_RESPONSE_TO_EPIDERMAL_GROWTH_FACTOR	http://www.gsea-msigdb.org/gsea/msigdb/cards/GO_RESPONSE_TO_EPIDERMAL_GROWTH_FACTOR	34	1.07410632471942	0.710803280946435	1
Heart	Arteria	c5.bp	GO_RESPONSE_TO_EPIDERMAL_GROWTH_FACTOR	http://www.gsea-msigdb.org/gsea/msigdb/cards/GO_RESPONSE_TO_EPIDERMAL_GROWTH_FACTOR	34	0	1	1
iPSC-CVPC	Arteria	c5.bp	GO_POSITIVE_REGULATION_OF_TRANSMEMBRANE_TRANSPORT	http://www.gsea-msigdb.org/gsea/msigdb/cards/GO_POSITIVE_REGULATION_OF_TRANSMEMBRANE_TRANSPORT	99	1.31101788386693	0.50106589876812	1
Heart	Arteria	c5.bp	GO_POSITIVE_REGULATION_OF_TRANSMEMBRANE_TRANSPORT	http://www.gsea-msigdb.org/gsea/msigdb/cards/GO_POSITIVE_REGULATION_OF_TRANSMEMBRANE_TRANSPORT	99	4.36476425312594	0.0163174613833726	1
iPSC-CVPC	Heart	c5.bp	GO_REGULATION_OF_CELLULAR_AMINE_METABOLIC_PROCESS	http://www.gsea-msigdb.org/gsea/msigdb/cards/GO_REGULATION_OF_CELLULAR_AMINE_METABOLIC_PROCESS	41	1.48448631423338	0.400675489357123	1
iPSC-CVPC	Arteria	c5.bp	GO_REGULATION_OF_CELLULAR_AMINE_METABOLIC_PROCESS	http://www.gsea-msigdb.org/gsea/msigdb/cards/GO_REGULATION_OF_CELLULAR_AMINE_METABOLIC_PROCESS	41	1.86338162809906	0.284797392924415	1
iPSC-CVPC	Arteria	c5.bp	GO_HISTONE_H2A_MONOUBIQUITINATION	http://www.gsea-msigdb.org/gsea/msigdb/cards/GO_HISTONE_H2A_MONOUBIQUITINATION	13	0	1	1
Heart	Arteria	c5.bp	GO_HISTONE_H2A_MONOUBIQUITINATION	http://www.gsea-msigdb.org/gsea/msigdb/cards/GO_HISTONE_H2A_MONOUBIQUITINATION	13	0	1	1
iPSC-CVPC	Heart	c5.bp	GO_REGULATION_OF_EXTRACELLULAR_MATRIX_ORGANIZATION	http://www.gsea-msigdb.org/gsea/msigdb/cards/GO_REGULATION_OF_EXTRACELLULAR_MATRIX_ORGANIZATION	23	0	1	1
iPSC-CVPC	Heart	c5.bp	GO_CELLULAR_AMINO_ACID_METABOLIC_PROCESS	http://www.gsea-msigdb.org/gsea/msigdb/cards/GO_CELLULAR_AMINO_ACID_METABOLIC_PROCESS	193	0.925916660688961	1	1
iPSC-CVPC	Arteria	c5.bp	GO_CELLULAR_AMINO_ACID_METABOLIC_PROCESS	http://www.gsea-msigdb.org/gsea/msigdb/cards/GO_CELLULAR_AMINO_ACID_METABOLIC_PROCESS	193	1.03923305796664	0.8729150126195	1
iPSC-CVPC	Arteria	c5.bp	GO_NUCLEOTIDE_TRANSPORT	http://www.gsea-msigdb.org/gsea/msigdb/cards/GO_NUCLEOTIDE_TRANSPORT	13	0	1	1
iPSC-CVPC	Heart	c5.bp	GO_CRISTAE_FORMATION	http://www.gsea-msigdb.org/gsea/msigdb/cards/GO_CRISTAE_FORMATION	18	3.62581132846749	0.120163020668895	1
iPSC-CVPC	Arteria	c5.bp	GO_CRISTAE_FORMATION	http://www.gsea-msigdb.org/gsea/msigdb/cards/GO_CRISTAE_FORMATION	18	0	0.621256050943545	1
iPSC-CVPC	Heart	c5.bp	GO_SYNAPTIC_VESICLE_RECYCLING	http://www.gsea-msigdb.org/gsea/msigdb/cards/GO_SYNAPTIC_VESICLE_RECYCLING	45	0.65579010562985	1	1
iPSC-CVPC	Arteria	c5.bp	GO_SYNAPTIC_VESICLE_RECYCLING	http://www.gsea-msigdb.org/gsea/msigdb/cards/GO_SYNAPTIC_VESICLE_RECYCLING	45	1.22844605200743	0.73661172277801	1
iPSC-CVPC	Arteria	c5.bp	GO_CELLULAR_RESPONSE_TO_INSULIN_STIMULUS	http://www.gsea-msigdb.org/gsea/msigdb/cards/GO_CELLULAR_RESPONSE_TO_INSULIN_STIMULUS	121	0.738396075942056	0.687208875220099	1
Heart	Arteria	c5.bp	GO_CELLULAR_RESPONSE_TO_INSULIN_STIMULUS	http://www.gsea-msigdb.org/gsea/msigdb/cards/GO_CELLULAR_RESPONSE_TO_INSULIN_STIMULUS	121	1.70486819904909	0.33460692329332	1
iPSC-CVPC	Arteria	c5.bp	GO_LIPID_DIGESTION	http://www.gsea-msigdb.org/gsea/msigdb/cards/GO_LIPID_DIGESTION	5	0	1	1
Heart	Arteria	c5.bp	GO_LIPID_DIGESTION	http://www.gsea-msigdb.org/gsea/msigdb/cards/GO_LIPID_DIGESTION	5	25.3438805277056	0.0482400366662635	1
iPSC-CVPC	Arteria	c5.bp	GO_ORGAN_OR_TISSUE_SPECIFIC_IMMUNE_RESPONSE	http://www.gsea-msigdb.org/gsea/msigdb/cards/GO_ORGAN_OR_TISSUE_SPECIFIC_IMMUNE_RESPONSE	7	0	1	1
Heart	Arteria	c5.bp	GO_ORGAN_OR_TISSUE_SPECIFIC_IMMUNE_RESPONSE	http://www.gsea-msigdb.org/gsea/msigdb/cards/GO_ORGAN_OR_TISSUE_SPECIFIC_IMMUNE_RESPONSE	7	0	1	1
iPSC-CVPC	Heart	c5.bp	GO_REGULATION_OF_MESONEPHROS_DEVELOPMENT	http://www.gsea-msigdb.org/gsea/msigdb/cards/GO_REGULATION_OF_MESONEPHROS_DEVELOPMENT	9	0	1	1
Heart	Arteria	c5.bp	GO_NAD_METABOLIC_PROCESS	http://www.gsea-msigdb.org/gsea/msigdb/cards/GO_NAD_METABOLIC_PROCESS	33	3.16519039056343	0.278736693159645	1
iPSC-CVPC	Arteria	c5.bp	GO_PROTEIN_LOCALIZATION_TO_LYSOSOME	http://www.gsea-msigdb.org/gsea/msigdb/cards/GO_PROTEIN_LOCALIZATION_TO_LYSOSOME	26	4.11671873348354	0.0124288827298422	1
iPSC-CVPC	Heart	c5.bp	GO_MRNA_MODIFICATION	http://www.gsea-msigdb.org/gsea/msigdb/cards/GO_MRNA_MODIFICATION	16	0	1	1
iPSC-CVPC	Arteria	c5.bp	GO_MRNA_MODIFICATION	http://www.gsea-msigdb.org/gsea/msigdb/cards/GO_MRNA_MODIFICATION	16	3.97972766005748	0.0542833784307076	1
iPSC-CVPC	Arteria	c5.bp	GO_HEMATOPOIETIC_STEM_CELL_DIFFERENTIATION	http://www.gsea-msigdb.org/gsea/msigdb/cards/GO_HEMATOPOIETIC_STEM_CELL_DIFFERENTIATION	53	2.2055250969201	0.0694705197380657	1
Heart	Arteria	c5.bp	GO_HEMATOPOIETIC_STEM_CELL_DIFFERENTIATION	http://www.gsea-msigdb.org/gsea/msigdb/cards/GO_HEMATOPOIETIC_STEM_CELL_DIFFERENTIATION	53	1.94435951279165	0.408609030744784	1
Heart	Arteria	c5.bp	GO_CELLULAR_RESPONSE_TO_TOPOLOGICALLY_INCORRECT_PROTEIN	http://www.gsea-msigdb.org/gsea/msigdb/cards/GO_CELLULAR_RESPONSE_TO_TOPOLOGICALLY_INCORRECT_PROTEIN	105	1.97267712976353	0.276468487829787	1
Heart	Arteria	c5.bp	GO_POSITIVE_REGULATION_OF_RELEASE_OF_CYTOCHROME_C_FROM_MITOCHONDRIA	http://www.gsea-msigdb.org/gsea/msigdb/cards/GO_POSITIVE_REGULATION_OF_RELEASE_OF_CYTOCHROME_C_FROM_MITOCHONDRIA	19	0	1	1
iPSC-CVPC	Arteria	c5.bp	GO_PEPTIDYL_PROLINE_HYDROXYLATION	http://www.gsea-msigdb.org/gsea/msigdb/cards/GO_PEPTIDYL_PROLINE_HYDROXYLATION	11	0	1	1
iPSC-CVPC	Heart	c5.bp	GO_NEGATIVE_REGULATION_OF_SMALL_GTPASE_MEDIATED_SIGNAL_TRANSDUCTION	http://www.gsea-msigdb.org/gsea/msigdb/cards/GO_NEGATIVE_REGULATION_OF_SMALL_GTPASE_MEDIATED_SIGNAL_TRANSDUCTION	40	3.23509224494237	0.043690616339669	1
Heart	Arteria	c5.bp	GO_NEGATIVE_REGULATION_OF_SMALL_GTPASE_MEDIATED_SIGNAL_TRANSDUCTION	http://www.gsea-msigdb.org/gsea/msigdb/cards/GO_NEGATIVE_REGULATION_OF_SMALL_GTPASE_MEDIATED_SIGNAL_TRANSDUCTION	40	2.59549990629093	0.327123011964139	1
Heart	Arteria	c5.bp	GO_REGULATION_OF_GROWTH	http://www.gsea-msigdb.org/gsea/msigdb/cards/GO_REGULATION_OF_GROWTH	392	0.506764760710152	0.595435747251666	1
iPSC-CVPC	Arteria	c5.bp	GO_GABAERGIC_NEURON_DIFFERENTIATION	http://www.gsea-msigdb.org/gsea/msigdb/cards/GO_GABAERGIC_NEURON_DIFFERENTIATION	4	0	1	1
Heart	Arteria	c5.bp	GO_GABAERGIC_NEURON_DIFFERENTIATION	http://www.gsea-msigdb.org/gsea/msigdb/cards/GO_GABAERGIC_NEURON_DIFFERENTIATION	4	0	1	1
iPSC-CVPC	Heart	c5.bp	GO_PHAGOLYSOSOME_ASSEMBLY	http://www.gsea-msigdb.org/gsea/msigdb/cards/GO_PHAGOLYSOSOME_ASSEMBLY	5	0	1	1
Heart	Arteria	c5.bp	GO_PHAGOLYSOSOME_ASSEMBLY	http://www.gsea-msigdb.org/gsea/msigdb/cards/GO_PHAGOLYSOSOME_ASSEMBLY	5	0	1	1
iPSC-CVPC	Arteria	c5.bp	GO_REGULATION_OF_VESICLE_MEDIATED_TRANSPORT	http://www.gsea-msigdb.org/gsea/msigdb/cards/GO_REGULATION_OF_VESICLE_MEDIATED_TRANSPORT	329	0.93431578547028	0.902249147709319	1
iPSC-CVPC	Heart	c5.bp	GO_ORGANONITROGEN_COMPOUND_CATABOLIC_PROCESS	http://www.gsea-msigdb.org/gsea/msigdb/cards/GO_ORGANONITROGEN_COMPOUND_CATABOLIC_PROCESS	806	1.17065571020561	0.414226542951012	1
iPSC-CVPC	Heart	c5.bp	GO_REGULATION_OF_ASTROCYTE_DIFFERENTIATION	http://www.gsea-msigdb.org/gsea/msigdb/cards/GO_REGULATION_OF_ASTROCYTE_DIFFERENTIATION	13	0	1	1
iPSC-CVPC	Arteria	c5.bp	GO_REGULATION_OF_ASTROCYTE_DIFFERENTIATION	http://www.gsea-msigdb.org/gsea/msigdb/cards/GO_REGULATION_OF_ASTROCYTE_DIFFERENTIATION	13	1.4325200938926	0.520888009781609	1
iPSC-CVPC	Arteria	c5.bp	GO_CALCIUM_DEPENDENT_CELL_CELL_ADHESION_VIA_PLASMA_MEMBRANE_CELL_ADHESION_MOLECULES	http://www.gsea-msigdb.org/gsea/msigdb/cards/GO_CALCIUM_DEPENDENT_CELL_CELL_ADHESION_VIA_PLASMA_MEMBRANE_CELL_ADHESION_MOLECULES	20	0	0.62419150327376	1
Heart	Arteria	c5.bp	GO_CALCIUM_DEPENDENT_CELL_CELL_ADHESION_VIA_PLASMA_MEMBRANE_CELL_ADHESION_MOLECULES	http://www.gsea-msigdb.org/gsea/msigdb/cards/GO_CALCIUM_DEPENDENT_CELL_CELL_ADHESION_VIA_PLASMA_MEMBRANE_CELL_ADHESION_MOLECULES	20	0	1	1
Heart	Arteria	c5.bp	GO_LEUKOCYTE_CHEMOTAXIS	http://www.gsea-msigdb.org/gsea/msigdb/cards/GO_LEUKOCYTE_CHEMOTAXIS	104	0	0.628671273166964	1
iPSC-CVPC	Heart	c5.bp	GO_GLUCOSE_6_PHOSPHATE_METABOLIC_PROCESS	http://www.gsea-msigdb.org/gsea/msigdb/cards/GO_GLUCOSE_6_PHOSPHATE_METABOLIC_PROCESS	11	0	1	1
iPSC-CVPC	Arteria	c5.bp	GO_GLUCOSE_6_PHOSPHATE_METABOLIC_PROCESS	http://www.gsea-msigdb.org/gsea/msigdb/cards/GO_GLUCOSE_6_PHOSPHATE_METABOLIC_PROCESS	11	0	1	1
Heart	Arteria	c5.bp	GO_GLUCOSE_6_PHOSPHATE_METABOLIC_PROCESS	http://www.gsea-msigdb.org/gsea/msigdb/cards/GO_GLUCOSE_6_PHOSPHATE_METABOLIC_PROCESS	11	0	1	1
Heart	Arteria	c5.bp	GO_HISTONE_H3_K9_MODIFICATION	http://www.gsea-msigdb.org/gsea/msigdb/cards/GO_HISTONE_H3_K9_MODIFICATION	33	3.16519039056343	0.278736693159645	1
iPSC-CVPC	Heart	c5.bp	GO_NEGATIVE_REGULATION_OF_TRANSLATIONAL_INITIATION	http://www.gsea-msigdb.org/gsea/msigdb/cards/GO_NEGATIVE_REGULATION_OF_TRANSLATIONAL_INITIATION	8	0	1	1
iPSC-CVPC	Arteria	c5.bp	GO_NEGATIVE_REGULATION_OF_TRANSLATIONAL_INITIATION	http://www.gsea-msigdb.org/gsea/msigdb/cards/GO_NEGATIVE_REGULATION_OF_TRANSLATIONAL_INITIATION	8	0	1	1
Heart	Arteria	c5.bp	GO_NEGATIVE_REGULATION_OF_TRANSLATIONAL_INITIATION	http://www.gsea-msigdb.org/gsea/msigdb/cards/GO_NEGATIVE_REGULATION_OF_TRANSLATIONAL_INITIATION	8	0	1	1
iPSC-CVPC	Heart	c5.bp	GO_CARDIAC_CONDUCTION_SYSTEM_DEVELOPMENT	http://www.gsea-msigdb.org/gsea/msigdb/cards/GO_CARDIAC_CONDUCTION_SYSTEM_DEVELOPMENT	7	0	1	1
iPSC-CVPC	Arteria	c5.bp	GO_CARDIAC_CONDUCTION_SYSTEM_DEVELOPMENT	http://www.gsea-msigdb.org/gsea/msigdb/cards/GO_CARDIAC_CONDUCTION_SYSTEM_DEVELOPMENT	7	2.86643075245736	0.32705832013432	1
Heart	Arteria	c5.bp	GO_CARDIAC_CONDUCTION_SYSTEM_DEVELOPMENT	http://www.gsea-msigdb.org/gsea/msigdb/cards/GO_CARDIAC_CONDUCTION_SYSTEM_DEVELOPMENT	7	0	1	1
iPSC-CVPC	Heart	c5.bp	GO_REGULATION_OF_GLOMERULAR_FILTRATION	http://www.gsea-msigdb.org/gsea/msigdb/cards/GO_REGULATION_OF_GLOMERULAR_FILTRATION	8	4.13576608214195	0.238343513900963	1
iPSC-CVPC	Arteria	c5.bp	GO_REGULATION_OF_GLOMERULAR_FILTRATION	http://www.gsea-msigdb.org/gsea/msigdb/cards/GO_REGULATION_OF_GLOMERULAR_FILTRATION	8	0	1	1
iPSC-CVPC	Heart	c5.bp	GO_RESPONSE_TO_METAL_ION	http://www.gsea-msigdb.org/gsea/msigdb/cards/GO_RESPONSE_TO_METAL_ION	195	1.408438977208	0.310506276121123	1
iPSC-CVPC	Arteria	c5.bp	GO_RESPONSE_TO_METAL_ION	http://www.gsea-msigdb.org/gsea/msigdb/cards/GO_RESPONSE_TO_METAL_ION	195	1.23242612095661	0.428360200389532	1
iPSC-CVPC	Heart	c5.bp	GO_CELL_SUBSTRATE_ADHESION	http://www.gsea-msigdb.org/gsea/msigdb/cards/GO_CELL_SUBSTRATE_ADHESION	225	0.788132449290631	0.708581047222617	1
Heart	Arteria	c5.bp	GO_NEGATIVE_REGULATION_OF_DEVELOPMENTAL_GROWTH	http://www.gsea-msigdb.org/gsea/msigdb/cards/GO_NEGATIVE_REGULATION_OF_DEVELOPMENTAL_GROWTH	70	0	1	1
iPSC-CVPC	Arteria	c5.bp	GO_ENDOCARDIAL_CUSHION_FORMATION	http://www.gsea-msigdb.org/gsea/msigdb/cards/GO_ENDOCARDIAL_CUSHION_FORMATION	16	0	1	1
iPSC-CVPC	Arteria	c5.bp	GO_REPLACEMENT_OSSIFICATION	http://www.gsea-msigdb.org/gsea/msigdb/cards/GO_REPLACEMENT_OSSIFICATION	15	0	1	1
Heart	Arteria	c5.bp	GO_REPLACEMENT_OSSIFICATION	http://www.gsea-msigdb.org/gsea/msigdb/cards/GO_REPLACEMENT_OSSIFICATION	15	0	1	1
iPSC-CVPC	Arteria	c5.bp	GO_WOUND_HEALING	http://www.gsea-msigdb.org/gsea/msigdb/cards/GO_WOUND_HEALING	284	0.888273716680729	0.791770067427416	1
Heart	Arteria	c5.bp	GO_WOUND_HEALING	http://www.gsea-msigdb.org/gsea/msigdb/cards/GO_WOUND_HEALING	284	1.07669191066728	0.759069079649759	1
iPSC-CVPC	Arteria	c5.bp	GO_REGULATION_OF_IRE1_MEDIATED_UNFOLDED_PROTEIN_RESPONSE	http://www.gsea-msigdb.org/gsea/msigdb/cards/GO_REGULATION_OF_IRE1_MEDIATED_UNFOLDED_PROTEIN_RESPONSE	5	4.30013123953848	0.246404002422746	1
Heart	Arteria	c5.bp	GO_REGULATION_OF_IRE1_MEDIATED_UNFOLDED_PROTEIN_RESPONSE	http://www.gsea-msigdb.org/gsea/msigdb/cards/GO_REGULATION_OF_IRE1_MEDIATED_UNFOLDED_PROTEIN_RESPONSE	5	0	1	1
iPSC-CVPC	Heart	c5.bp	GO_REGULATION_OF_CYTOKINE_PRODUCTION_INVOLVED_IN_IMMUNE_RESPONSE	http://www.gsea-msigdb.org/gsea/msigdb/cards/GO_REGULATION_OF_CYTOKINE_PRODUCTION_INVOLVED_IN_IMMUNE_RESPONSE	40	0.740220986443109	1	1
iPSC-CVPC	Arteria	c5.bp	GO_REGULATION_OF_CYTOKINE_PRODUCTION_INVOLVED_IN_IMMUNE_RESPONSE	http://www.gsea-msigdb.org/gsea/msigdb/cards/GO_REGULATION_OF_CYTOKINE_PRODUCTION_INVOLVED_IN_IMMUNE_RESPONSE	40	0.904010334555831	1	1
Heart	Arteria	c5.bp	GO_REGULATION_OF_CYTOKINE_PRODUCTION_INVOLVED_IN_IMMUNE_RESPONSE	http://www.gsea-msigdb.org/gsea/msigdb/cards/GO_REGULATION_OF_CYTOKINE_PRODUCTION_INVOLVED_IN_IMMUNE_RESPONSE	40	2.59549990629093	0.327123011964139	1
iPSC-CVPC	Arteria	c5.bp	GO_PORPHYRIN_CONTAINING_COMPOUND_METABOLIC_PROCESS	http://www.gsea-msigdb.org/gsea/msigdb/cards/GO_PORPHYRIN_CONTAINING_COMPOUND_METABOLIC_PROCESS	20	0.904174230095951	1	1
Heart	Arteria	c5.bp	GO_PORPHYRIN_CONTAINING_COMPOUND_METABOLIC_PROCESS	http://www.gsea-msigdb.org/gsea/msigdb/cards/GO_PORPHYRIN_CONTAINING_COMPOUND_METABOLIC_PROCESS	20	0	1	1
iPSC-CVPC	Heart	c5.bp	GO_NEGATIVE_REGULATION_OF_INTERLEUKIN_6_PRODUCTION	http://www.gsea-msigdb.org/gsea/msigdb/cards/GO_NEGATIVE_REGULATION_OF_INTERLEUKIN_6_PRODUCTION	19	0	1	1
iPSC-CVPC	Arteria	c5.bp	GO_NEGATIVE_REGULATION_OF_INTERLEUKIN_6_PRODUCTION	http://www.gsea-msigdb.org/gsea/msigdb/cards/GO_NEGATIVE_REGULATION_OF_INTERLEUKIN_6_PRODUCTION	19	0	0.622201972793475	1
Heart	Arteria	c5.bp	GO_NEGATIVE_REGULATION_OF_INTERLEUKIN_6_PRODUCTION	http://www.gsea-msigdb.org/gsea/msigdb/cards/GO_NEGATIVE_REGULATION_OF_INTERLEUKIN_6_PRODUCTION	19	0	1	1
iPSC-CVPC	Heart	c5.bp	GO_CELLULAR_MONOVALENT_INORGANIC_CATION_HOMEOSTASIS	http://www.gsea-msigdb.org/gsea/msigdb/cards/GO_CELLULAR_MONOVALENT_INORGANIC_CATION_HOMEOSTASIS	55	0.53383236090904	1	1
iPSC-CVPC	Arteria	c5.bp	GO_CELLULAR_MONOVALENT_INORGANIC_CATION_HOMEOSTASIS	http://www.gsea-msigdb.org/gsea/msigdb/cards/GO_CELLULAR_MONOVALENT_INORGANIC_CATION_HOMEOSTASIS	55	1.72428105482497	0.227884274292582	1
iPSC-CVPC	Heart	c5.bp	GO_RESPONSE_TO_METHYLMERCURY	http://www.gsea-msigdb.org/gsea/msigdb/cards/GO_RESPONSE_TO_METHYLMERCURY	5	0	1	1
iPSC-CVPC	Arteria	c5.bp	GO_RESPONSE_TO_METHYLMERCURY	http://www.gsea-msigdb.org/gsea/msigdb/cards/GO_RESPONSE_TO_METHYLMERCURY	5	0	1	1
Heart	Arteria	c5.bp	GO_RESPONSE_TO_METHYLMERCURY	http://www.gsea-msigdb.org/gsea/msigdb/cards/GO_RESPONSE_TO_METHYLMERCURY	5	25.3438805277056	0.0482400366662635	1
Heart	Arteria	c5.bp	GO_REGULATION_OF_ACUTE_INFLAMMATORY_RESPONSE	http://www.gsea-msigdb.org/gsea/msigdb/cards/GO_REGULATION_OF_ACUTE_INFLAMMATORY_RESPONSE	19	0	1	1
iPSC-CVPC	Arteria	c5.bp	GO_CYTOKINE_PRODUCTION	http://www.gsea-msigdb.org/gsea/msigdb/cards/GO_CYTOKINE_PRODUCTION	394	1.01678631173598	0.910276137954589	1
iPSC-CVPC	Heart	c5.bp	GO_DEMETHYLATION	http://www.gsea-msigdb.org/gsea/msigdb/cards/GO_DEMETHYLATION	41	0	0.647882115269948	1
iPSC-CVPC	Arteria	c5.bp	GO_DEMETHYLATION	http://www.gsea-msigdb.org/gsea/msigdb/cards/GO_DEMETHYLATION	41	0.428607350637856	0.726407847736492	1
Heart	Arteria	c5.bp	GO_DEMETHYLATION	http://www.gsea-msigdb.org/gsea/msigdb/cards/GO_DEMETHYLATION	41	0	1	1
iPSC-CVPC	Heart	c5.bp	GO_REGULATION_OF_MONONUCLEAR_CELL_MIGRATION	http://www.gsea-msigdb.org/gsea/msigdb/cards/GO_REGULATION_OF_MONONUCLEAR_CELL_MIGRATION	24	0	1	1
iPSC-CVPC	Arteria	c5.bp	GO_REGULATION_OF_MONONUCLEAR_CELL_MIGRATION	http://www.gsea-msigdb.org/gsea/msigdb/cards/GO_REGULATION_OF_MONONUCLEAR_CELL_MIGRATION	24	0.746635419487616	1	1
iPSC-CVPC	Heart	c5.bp	GO_CERAMIDE_BIOSYNTHETIC_PROCESS	http://www.gsea-msigdb.org/gsea/msigdb/cards/GO_CERAMIDE_BIOSYNTHETIC_PROCESS	38	1.60865666571375	0.364672774608185	1
iPSC-CVPC	Arteria	c5.bp	GO_CERAMIDE_BIOSYNTHETIC_PROCESS	http://www.gsea-msigdb.org/gsea/msigdb/cards/GO_CERAMIDE_BIOSYNTHETIC_PROCESS	38	0.463496046292466	0.722050089681096	1
Heart	Arteria	c5.bp	GO_CERAMIDE_BIOSYNTHETIC_PROCESS	http://www.gsea-msigdb.org/gsea/msigdb/cards/GO_CERAMIDE_BIOSYNTHETIC_PROCESS	38	2.7362023852412	0.313636264329464	1
iPSC-CVPC	Arteria	c5.bp	GO_NEGATIVE_REGULATION_OF_ORGAN_GROWTH	http://www.gsea-msigdb.org/gsea/msigdb/cards/GO_NEGATIVE_REGULATION_OF_ORGAN_GROWTH	23	0.780649970119104	1	1
iPSC-CVPC	Heart	c5.bp	GO_MICROTUBULE_CYTOSKELETON_ORGANIZATION	http://www.gsea-msigdb.org/gsea/msigdb/cards/GO_MICROTUBULE_CYTOSKELETON_ORGANIZATION	346	1.13291176321395	0.646950177159974	1
iPSC-CVPC	Arteria	c5.bp	GO_MICROTUBULE_CYTOSKELETON_ORGANIZATION	http://www.gsea-msigdb.org/gsea/msigdb/cards/GO_MICROTUBULE_CYTOSKELETON_ORGANIZATION	346	1.6651219433171	0.0156276125392124	1
iPSC-CVPC	Heart	c5.bp	GO_HISTONE_MONOUBIQUITINATION	http://www.gsea-msigdb.org/gsea/msigdb/cards/GO_HISTONE_MONOUBIQUITINATION	17	0	1	1
iPSC-CVPC	Arteria	c5.bp	GO_HISTONE_MONOUBIQUITINATION	http://www.gsea-msigdb.org/gsea/msigdb/cards/GO_HISTONE_MONOUBIQUITINATION	17	1.07398001056137	0.618029952569981	1
Heart	Arteria	c5.bp	GO_HISTONE_MONOUBIQUITINATION	http://www.gsea-msigdb.org/gsea/msigdb/cards/GO_HISTONE_MONOUBIQUITINATION	17	0	1	1
Heart	Arteria	c5.bp	GO_REGULATION_OF_CELL_CYCLE_G2_M_PHASE_TRANSITION	http://www.gsea-msigdb.org/gsea/msigdb/cards/GO_REGULATION_OF_CELL_CYCLE_G2_M_PHASE_TRANSITION	142	2.99267182342381	0.0512907950106577	1
Heart	Arteria	c5.bp	GO_PIGMENTATION	http://www.gsea-msigdb.org/gsea/msigdb/cards/GO_PIGMENTATION	57	0	1	1
iPSC-CVPC	Arteria	c5.bp	GO_NEGATIVE_REGULATION_OF_CELL_AGING	http://www.gsea-msigdb.org/gsea/msigdb/cards/GO_NEGATIVE_REGULATION_OF_CELL_AGING	18	2.15155712884977	0.260327334016662	1
Heart	Arteria	c5.bp	GO_NEGATIVE_REGULATION_OF_CELL_AGING	http://www.gsea-msigdb.org/gsea/msigdb/cards/GO_NEGATIVE_REGULATION_OF_CELL_AGING	18	0	1	1
iPSC-CVPC	Heart	c5.bp	GO_AORTA_DEVELOPMENT	http://www.gsea-msigdb.org/gsea/msigdb/cards/GO_AORTA_DEVELOPMENT	37	0	0.635870978760966	1
iPSC-CVPC	Arteria	c5.bp	GO_AORTA_DEVELOPMENT	http://www.gsea-msigdb.org/gsea/msigdb/cards/GO_AORTA_DEVELOPMENT	37	4.04476013039622	0.00356920655538746	0.631608781683892
iPSC-CVPC	Heart	c5.bp	GO_CELL_DIFFERENTIATION_INVOLVED_IN_EMBRYONIC_PLACENTA_DEVELOPMENT	http://www.gsea-msigdb.org/gsea/msigdb/cards/GO_CELL_DIFFERENTIATION_INVOLVED_IN_EMBRYONIC_PLACENTA_DEVELOPMENT	11	0	1	1
iPSC-CVPC	Heart	c5.bp	GO_ASYMMETRIC_CELL_DIVISION	http://www.gsea-msigdb.org/gsea/msigdb/cards/GO_ASYMMETRIC_CELL_DIVISION	12	0	1	1
iPSC-CVPC	Arteria	c5.bp	GO_ASYMMETRIC_CELL_DIVISION	http://www.gsea-msigdb.org/gsea/msigdb/cards/GO_ASYMMETRIC_CELL_DIVISION	12	0	1	1
iPSC-CVPC	Heart	c5.bp	GO_LIPID_HOMEOSTASIS	http://www.gsea-msigdb.org/gsea/msigdb/cards/GO_LIPID_HOMEOSTASIS	76	0.383580770352616	0.521800923338503	1
iPSC-CVPC	Arteria	c5.bp	GO_LIPID_HOMEOSTASIS	http://www.gsea-msigdb.org/gsea/msigdb/cards/GO_LIPID_HOMEOSTASIS	76	0.954263273462525	1	1
Heart	Arteria	c5.bp	GO_LIPID_HOMEOSTASIS	http://www.gsea-msigdb.org/gsea/msigdb/cards/GO_LIPID_HOMEOSTASIS	76	0	1	1
iPSC-CVPC	Heart	c5.bp	GO_NEURAL_PRECURSOR_CELL_PROLIFERATION	http://www.gsea-msigdb.org/gsea/msigdb/cards/GO_NEURAL_PRECURSOR_CELL_PROLIFERATION	73	0	0.179776313012751	1
Heart	Arteria	c5.bp	GO_NEURAL_PRECURSOR_CELL_PROLIFERATION	http://www.gsea-msigdb.org/gsea/msigdb/cards/GO_NEURAL_PRECURSOR_CELL_PROLIFERATION	73	0	1	1
iPSC-CVPC	Heart	c5.bp	GO_PEPTIDE_METABOLIC_PROCESS	http://www.gsea-msigdb.org/gsea/msigdb/cards/GO_PEPTIDE_METABOLIC_PROCESS	474	1.21825231875903	0.431033451968586	1
iPSC-CVPC	Arteria	c5.bp	GO_PEPTIDE_METABOLIC_PROCESS	http://www.gsea-msigdb.org/gsea/msigdb/cards/GO_PEPTIDE_METABOLIC_PROCESS	474	1.53188795861547	0.01755936328608	1
iPSC-CVPC	Heart	c5.bp	GO_NEGATIVE_REGULATION_OF_CELL_SUBSTRATE_ADHESION	http://www.gsea-msigdb.org/gsea/msigdb/cards/GO_NEGATIVE_REGULATION_OF_CELL_SUBSTRATE_ADHESION	40	0	0.64457033172966	1
iPSC-CVPC	Arteria	c5.bp	GO_NEGATIVE_REGULATION_OF_CELL_SUBSTRATE_ADHESION	http://www.gsea-msigdb.org/gsea/msigdb/cards/GO_NEGATIVE_REGULATION_OF_CELL_SUBSTRATE_ADHESION	40	2.46678655204368	0.0665884265158956	1
iPSC-CVPC	Heart	c5.bp	GO_ENDOTHELIAL_CELL_MIGRATION	http://www.gsea-msigdb.org/gsea/msigdb/cards/GO_ENDOTHELIAL_CELL_MIGRATION	132	0.90191991450671	1	1
iPSC-CVPC	Arteria	c5.bp	GO_ENDOTHELIAL_CELL_MIGRATION	http://www.gsea-msigdb.org/gsea/msigdb/cards/GO_ENDOTHELIAL_CELL_MIGRATION	132	0.816334875703968	0.846738472314865	1
Heart	Arteria	c5.bp	GO_ENDOTHELIAL_CELL_MIGRATION	http://www.gsea-msigdb.org/gsea/msigdb/cards/GO_ENDOTHELIAL_CELL_MIGRATION	132	0.766091189375491	1	1
iPSC-CVPC	Arteria	c5.bp	GO_PEPTIDYL_AMINO_ACID_MODIFICATION	http://www.gsea-msigdb.org/gsea/msigdb/cards/GO_PEPTIDYL_AMINO_ACID_MODIFICATION	788	0.760977193650918	0.143532530005651	1
Heart	Arteria	c5.bp	GO_PEPTIDYL_AMINO_ACID_MODIFICATION	http://www.gsea-msigdb.org/gsea/msigdb/cards/GO_PEPTIDYL_AMINO_ACID_MODIFICATION	788	1.32454337395728	0.350908349370902	1
iPSC-CVPC	Heart	c5.bp	GO_SECRETION	http://www.gsea-msigdb.org/gsea/msigdb/cards/GO_SECRETION	853	1.09826124207687	0.619219777347913	1
iPSC-CVPC	Heart	c5.bp	GO_REGULATION_OF_SEQUESTERING_OF_TRIGLYCERIDE	http://www.gsea-msigdb.org/gsea/msigdb/cards/GO_REGULATION_OF_SEQUESTERING_OF_TRIGLYCERIDE	8	0	1	1
iPSC-CVPC	Arteria	c5.bp	GO_REGULATION_OF_SEQUESTERING_OF_TRIGLYCERIDE	http://www.gsea-msigdb.org/gsea/msigdb/cards/GO_REGULATION_OF_SEQUESTERING_OF_TRIGLYCERIDE	8	0	1	1
iPSC-CVPC	Heart	c5.bp	GO_NEGATIVE_REGULATION_OF_FIBROBLAST_GROWTH_FACTOR_RECEPTOR_SIGNALING_PATHWAY	http://www.gsea-msigdb.org/gsea/msigdb/cards/GO_NEGATIVE_REGULATION_OF_FIBROBLAST_GROWTH_FACTOR_RECEPTOR_SIGNALING_PATHWAY	9	3.61846596404125	0.263839188119187	1
iPSC-CVPC	Arteria	c5.bp	GO_NEGATIVE_REGULATION_OF_FIBROBLAST_GROWTH_FACTOR_RECEPTOR_SIGNALING_PATHWAY	http://www.gsea-msigdb.org/gsea/msigdb/cards/GO_NEGATIVE_REGULATION_OF_FIBROBLAST_GROWTH_FACTOR_RECEPTOR_SIGNALING_PATHWAY	9	0	1	1
Heart	Arteria	c5.bp	GO_NEGATIVE_REGULATION_OF_FIBROBLAST_GROWTH_FACTOR_RECEPTOR_SIGNALING_PATHWAY	http://www.gsea-msigdb.org/gsea/msigdb/cards/GO_NEGATIVE_REGULATION_OF_FIBROBLAST_GROWTH_FACTOR_RECEPTOR_SIGNALING_PATHWAY	9	0	1	1
Heart	Arteria	c5.bp	GO_NEGATIVE_REGULATION_OF_PROTEIN_OLIGOMERIZATION	http://www.gsea-msigdb.org/gsea/msigdb/cards/GO_NEGATIVE_REGULATION_OF_PROTEIN_OLIGOMERIZATION	9	0	1	1
iPSC-CVPC	Arteria	c5.bp	GO_HOMOCYSTEINE_METABOLIC_PROCESS	http://www.gsea-msigdb.org/gsea/msigdb/cards/GO_HOMOCYSTEINE_METABOLIC_PROCESS	10	0	1	1
Heart	Arteria	c5.bp	GO_HOMOCYSTEINE_METABOLIC_PROCESS	http://www.gsea-msigdb.org/gsea/msigdb/cards/GO_HOMOCYSTEINE_METABOLIC_PROCESS	10	0	1	1
iPSC-CVPC	Heart	c5.bp	GO_COFACTOR_CATABOLIC_PROCESS	http://www.gsea-msigdb.org/gsea/msigdb/cards/GO_COFACTOR_CATABOLIC_PROCESS	25	3.96445300020132	0.0495362440660088	1
iPSC-CVPC	Heart	c5.bp	GO_PYRIMIDINE_CONTAINING_COMPOUND_CATABOLIC_PROCESS	http://www.gsea-msigdb.org/gsea/msigdb/cards/GO_PYRIMIDINE_CONTAINING_COMPOUND_CATABOLIC_PROCESS	25	2.52073953342977	0.203137656780452	1
iPSC-CVPC	Arteria	c5.bp	GO_PYRIMIDINE_CONTAINING_COMPOUND_CATABOLIC_PROCESS	http://www.gsea-msigdb.org/gsea/msigdb/cards/GO_PYRIMIDINE_CONTAINING_COMPOUND_CATABOLIC_PROCESS	25	0.715455254776908	1	1
iPSC-CVPC	Heart	c5.bp	GO_NEGATIVE_REGULATION_OF_DNA_BINDING	http://www.gsea-msigdb.org/gsea/msigdb/cards/GO_NEGATIVE_REGULATION_OF_DNA_BINDING	32	0.931955759651939	1	1
iPSC-CVPC	Arteria	c5.bp	GO_NEGATIVE_REGULATION_OF_DNA_BINDING	http://www.gsea-msigdb.org/gsea/msigdb/cards/GO_NEGATIVE_REGULATION_OF_DNA_BINDING	32	2.46427105127092	0.0964818576510049	1
iPSC-CVPC	Heart	c5.bp	GO_CELL_CELL_ADHESION	http://www.gsea-msigdb.org/gsea/msigdb/cards/GO_CELL_CELL_ADHESION	438	0.39112811747752	0.0141026152520964	1
iPSC-CVPC	Arteria	c5.bp	GO_CELL_CELL_ADHESION	http://www.gsea-msigdb.org/gsea/msigdb/cards/GO_CELL_CELL_ADHESION	438	0.728036735721603	0.23778391838852	1
Heart	Arteria	c5.bp	GO_CELL_CELL_ADHESION	http://www.gsea-msigdb.org/gsea/msigdb/cards/GO_CELL_CELL_ADHESION	438	1.1703035315703	0.621617144256354	1
iPSC-CVPC	Arteria	c5.bp	GO_CELLULAR_RESPONSE_TO_ATP	http://www.gsea-msigdb.org/gsea/msigdb/cards/GO_CELLULAR_RESPONSE_TO_ATP	12	0	1	1
iPSC-CVPC	Arteria	c5.bp	GO_BETA_CATENIN_DESTRUCTION_COMPLEX_DISASSEMBLY	http://www.gsea-msigdb.org/gsea/msigdb/cards/GO_BETA_CATENIN_DESTRUCTION_COMPLEX_DISASSEMBLY	9	0	1	1
Heart	Arteria	c5.bp	GO_BETA_CATENIN_DESTRUCTION_COMPLEX_DISASSEMBLY	http://www.gsea-msigdb.org/gsea/msigdb/cards/GO_BETA_CATENIN_DESTRUCTION_COMPLEX_DISASSEMBLY	9	0	1	1
Heart	Arteria	c5.bp	GO_INNER_DYNEIN_ARM_ASSEMBLY	http://www.gsea-msigdb.org/gsea/msigdb/cards/GO_INNER_DYNEIN_ARM_ASSEMBLY	4	0	1	1
iPSC-CVPC	Heart	c5.bp	GO_POSITIVE_REGULATION_OF_GUANYLATE_CYCLASE_ACTIVITY	http://www.gsea-msigdb.org/gsea/msigdb/cards/GO_POSITIVE_REGULATION_OF_GUANYLATE_CYCLASE_ACTIVITY	1	0	1	1
iPSC-CVPC	Arteria	c5.bp	GO_POSITIVE_REGULATION_OF_GUANYLATE_CYCLASE_ACTIVITY	http://www.gsea-msigdb.org/gsea/msigdb/cards/GO_POSITIVE_REGULATION_OF_GUANYLATE_CYCLASE_ACTIVITY	1	0	1	1
iPSC-CVPC	Heart	c5.bp	GO_REGULATION_OF_VACUOLAR_TRANSPORT	http://www.gsea-msigdb.org/gsea/msigdb/cards/GO_REGULATION_OF_VACUOLAR_TRANSPORT	3	0	1	1
iPSC-CVPC	Arteria	c5.bp	GO_REGULATION_OF_VACUOLAR_TRANSPORT	http://www.gsea-msigdb.org/gsea/msigdb/cards/GO_REGULATION_OF_VACUOLAR_TRANSPORT	3	8.60080469666007	0.156101417358333	1
iPSC-CVPC	Heart	c5.bp	GO_NEGATIVE_REGULATION_OF_EXTRINSIC_APOPTOTIC_SIGNALING_PATHWAY	http://www.gsea-msigdb.org/gsea/msigdb/cards/GO_NEGATIVE_REGULATION_OF_EXTRINSIC_APOPTOTIC_SIGNALING_PATHWAY	64	0	0.278347345362548	1
iPSC-CVPC	Arteria	c5.bp	GO_NEGATIVE_REGULATION_OF_EXTRINSIC_APOPTOTIC_SIGNALING_PATHWAY	http://www.gsea-msigdb.org/gsea/msigdb/cards/GO_NEGATIVE_REGULATION_OF_EXTRINSIC_APOPTOTIC_SIGNALING_PATHWAY	64	0.271512967914114	0.264465575665841	1
Heart	Arteria	c5.bp	GO_NEGATIVE_REGULATION_OF_EXTRINSIC_APOPTOTIC_SIGNALING_PATHWAY	http://www.gsea-msigdb.org/gsea/msigdb/cards/GO_NEGATIVE_REGULATION_OF_EXTRINSIC_APOPTOTIC_SIGNALING_PATHWAY	64	3.28961287469115	0.130743892478576	1
iPSC-CVPC	Heart	c5.bp	GO_REGULATION_OF_BONE_DEVELOPMENT	http://www.gsea-msigdb.org/gsea/msigdb/cards/GO_REGULATION_OF_BONE_DEVELOPMENT	10	3.21625307367113	0.28848373142765	1
iPSC-CVPC	Arteria	c5.bp	GO_REGULATION_OF_BONE_DEVELOPMENT	http://www.gsea-msigdb.org/gsea/msigdb/cards/GO_REGULATION_OF_BONE_DEVELOPMENT	10	0	1	1
Heart	Arteria	c5.bp	GO_POSITIVE_REGULATION_OF_MRNA_SPLICING_VIA_SPLICEOSOME	http://www.gsea-msigdb.org/gsea/msigdb/cards/GO_POSITIVE_REGULATION_OF_MRNA_SPLICING_VIA_SPLICEOSOME	12	0	1	1
iPSC-CVPC	Heart	c5.bp	GO_POSTTRANSCRIPTIONAL_REGULATION_OF_GENE_EXPRESSION	http://www.gsea-msigdb.org/gsea/msigdb/cards/GO_POSTTRANSCRIPTIONAL_REGULATION_OF_GENE_EXPRESSION	383	1.35923411757458	0.243934964717965	1
iPSC-CVPC	Arteria	c5.bp	GO_POSTTRANSCRIPTIONAL_REGULATION_OF_GENE_EXPRESSION	http://www.gsea-msigdb.org/gsea/msigdb/cards/GO_POSTTRANSCRIPTIONAL_REGULATION_OF_GENE_EXPRESSION	383	1.372960048057	0.136125733399255	1
iPSC-CVPC	Arteria	c5.bp	GO_RESPONSE_TO_ENDOGENOUS_STIMULUS	http://www.gsea-msigdb.org/gsea/msigdb/cards/GO_RESPONSE_TO_ENDOGENOUS_STIMULUS	914	1.08690261452503	0.544419829992567	1
iPSC-CVPC	Heart	c5.bp	GO_POSITIVE_REGULATION_OF_CELL_MATRIX_ADHESION	http://www.gsea-msigdb.org/gsea/msigdb/cards/GO_POSITIVE_REGULATION_OF_CELL_MATRIX_ADHESION	35	0.849482549548683	1	1
iPSC-CVPC	Arteria	c5.bp	GO_POSITIVE_REGULATION_OF_CELL_MATRIX_ADHESION	http://www.gsea-msigdb.org/gsea/msigdb/cards/GO_POSITIVE_REGULATION_OF_CELL_MATRIX_ADHESION	35	1.04150225927059	0.718695057633147	1
iPSC-CVPC	Arteria	c5.bp	GO_WATER_TRANSPORT	http://www.gsea-msigdb.org/gsea/msigdb/cards/GO_WATER_TRANSPORT	8	0	1	1
iPSC-CVPC	Arteria	c5.bp	GO_ESTABLISHMENT_OF_CELL_POLARITY	http://www.gsea-msigdb.org/gsea/msigdb/cards/GO_ESTABLISHMENT_OF_CELL_POLARITY	93	1.62557859810948	0.171587554136185	1
iPSC-CVPC	Heart	c5.bp	GO_POSITIVE_REGULATION_OF_NITRIC_OXIDE_SYNTHASE_BIOSYNTHETIC_PROCESS	http://www.gsea-msigdb.org/gsea/msigdb/cards/GO_POSITIVE_REGULATION_OF_NITRIC_OXIDE_SYNTHASE_BIOSYNTHETIC_PROCESS	9	0	1	1
iPSC-CVPC	Arteria	c5.bp	GO_POSITIVE_REGULATION_OF_NITRIC_OXIDE_SYNTHASE_BIOSYNTHETIC_PROCESS	http://www.gsea-msigdb.org/gsea/msigdb/cards/GO_POSITIVE_REGULATION_OF_NITRIC_OXIDE_SYNTHASE_BIOSYNTHETIC_PROCESS	9	8.62680200953585	0.0108341629313851	0.989855946416975
Heart	Arteria	c5.bp	GO_DIGESTIVE_SYSTEM_DEVELOPMENT	http://www.gsea-msigdb.org/gsea/msigdb/cards/GO_DIGESTIVE_SYSTEM_DEVELOPMENT	82	0	1	1
iPSC-CVPC	Heart	c5.bp	GO_POSITIVE_REGULATION_OF_STEROID_BIOSYNTHETIC_PROCESS	http://www.gsea-msigdb.org/gsea/msigdb/cards/GO_POSITIVE_REGULATION_OF_STEROID_BIOSYNTHETIC_PROCESS	8	0	1	1
iPSC-CVPC	Arteria	c5.bp	GO_POSITIVE_REGULATION_OF_STEROID_BIOSYNTHETIC_PROCESS	http://www.gsea-msigdb.org/gsea/msigdb/cards/GO_POSITIVE_REGULATION_OF_STEROID_BIOSYNTHETIC_PROCESS	8	2.45677597834622	0.36409345665046	1
Heart	Arteria	c5.bp	GO_POSITIVE_REGULATION_OF_STEROID_BIOSYNTHETIC_PROCESS	http://www.gsea-msigdb.org/gsea/msigdb/cards/GO_POSITIVE_REGULATION_OF_STEROID_BIOSYNTHETIC_PROCESS	8	0	1	1
iPSC-CVPC	Heart	c5.bp	GO_DNA_CONFORMATION_CHANGE	http://www.gsea-msigdb.org/gsea/msigdb/cards/GO_DNA_CONFORMATION_CHANGE	165	0.714741119346434	0.663723659149089	1
iPSC-CVPC	Arteria	c5.bp	GO_DNA_CONFORMATION_CHANGE	http://www.gsea-msigdb.org/gsea/msigdb/cards/GO_DNA_CONFORMATION_CHANGE	165	1.6074479064239	0.117148734914173	1
iPSC-CVPC	Heart	c5.bp	GO_SEXUAL_REPRODUCTION	http://www.gsea-msigdb.org/gsea/msigdb/cards/GO_SEXUAL_REPRODUCTION	370	0.467385867689413	0.074781367644904	1
Heart	Arteria	c5.bp	GO_SYNAPTONEMAL_COMPLEX_ORGANIZATION	http://www.gsea-msigdb.org/gsea/msigdb/cards/GO_SYNAPTONEMAL_COMPLEX_ORGANIZATION	9	0	1	1
iPSC-CVPC	Heart	c5.bp	GO_BASE_EXCISION_REPAIR	http://www.gsea-msigdb.org/gsea/msigdb/cards/GO_BASE_EXCISION_REPAIR	30	0.996416451856083	1	1
iPSC-CVPC	Arteria	c5.bp	GO_BASE_EXCISION_REPAIR	http://www.gsea-msigdb.org/gsea/msigdb/cards/GO_BASE_EXCISION_REPAIR	30	1.22805552807341	0.67993925153734	1
iPSC-CVPC	Heart	c5.bp	GO_NEGATIVE_REGULATION_OF_AXON_GUIDANCE	http://www.gsea-msigdb.org/gsea/msigdb/cards/GO_NEGATIVE_REGULATION_OF_AXON_GUIDANCE	21	0	1	1
iPSC-CVPC	Arteria	c5.bp	GO_NEGATIVE_REGULATION_OF_AXON_GUIDANCE	http://www.gsea-msigdb.org/gsea/msigdb/cards/GO_NEGATIVE_REGULATION_OF_AXON_GUIDANCE	21	0	0.627107167617553	1
iPSC-CVPC	Heart	c5.bp	GO_REGULATION_OF_CARDIAC_MUSCLE_CELL_MEMBRANE_REPOLARIZATION	http://www.gsea-msigdb.org/gsea/msigdb/cards/GO_REGULATION_OF_CARDIAC_MUSCLE_CELL_MEMBRANE_REPOLARIZATION	14	0	1	1
iPSC-CVPC	Arteria	c5.bp	GO_REGULATION_OF_CARDIAC_MUSCLE_CELL_MEMBRANE_REPOLARIZATION	http://www.gsea-msigdb.org/gsea/msigdb/cards/GO_REGULATION_OF_CARDIAC_MUSCLE_CELL_MEMBRANE_REPOLARIZATION	14	1.32222215691555	0.547270630631346	1
iPSC-CVPC	Arteria	c5.bp	GO_REGULATION_OF_AMYLOID_PRECURSOR_PROTEIN_CATABOLIC_PROCESS	http://www.gsea-msigdb.org/gsea/msigdb/cards/GO_REGULATION_OF_AMYLOID_PRECURSOR_PROTEIN_CATABOLIC_PROCESS	23	1.63847645086098	0.363434281447563	1
Heart	Arteria	c5.bp	GO_REGULATION_OF_AMYLOID_PRECURSOR_PROTEIN_CATABOLIC_PROCESS	http://www.gsea-msigdb.org/gsea/msigdb/cards/GO_REGULATION_OF_AMYLOID_PRECURSOR_PROTEIN_CATABOLIC_PROCESS	23	0	1	1
Heart	Arteria	c5.bp	GO_REGULATION_OF_EXTRINSIC_APOPTOTIC_SIGNALING_PATHWAY_VIA_DEATH_DOMAIN_RECEPTORS	http://www.gsea-msigdb.org/gsea/msigdb/cards/GO_REGULATION_OF_EXTRINSIC_APOPTOTIC_SIGNALING_PATHWAY_VIA_DEATH_DOMAIN_RECEPTORS	36	0	1	1
Heart	Arteria	c5.bp	GO_POSITIVE_REGULATION_OF_HISTONE_DEACETYLATION	http://www.gsea-msigdb.org/gsea/msigdb/cards/GO_POSITIVE_REGULATION_OF_HISTONE_DEACETYLATION	16	0	1	1
iPSC-CVPC	Arteria	c5.bp	GO_AMYLOID_PRECURSOR_PROTEIN_METABOLIC_PROCESS	http://www.gsea-msigdb.org/gsea/msigdb/cards/GO_AMYLOID_PRECURSOR_PROTEIN_METABOLIC_PROCESS	45	1.22844605200743	0.73661172277801	1
Heart	Arteria	c5.bp	GO_AMYLOID_PRECURSOR_PROTEIN_METABOLIC_PROCESS	http://www.gsea-msigdb.org/gsea/msigdb/cards/GO_AMYLOID_PRECURSOR_PROTEIN_METABOLIC_PROCESS	45	0	1	1
iPSC-CVPC	Heart	c5.bp	GO_NUCLEIC_ACID_PHOSPHODIESTER_BOND_HYDROLYSIS	http://www.gsea-msigdb.org/gsea/msigdb/cards/GO_NUCLEIC_ACID_PHOSPHODIESTER_BOND_HYDROLYSIS	201	0.433083102437201	0.166099314802914	1
iPSC-CVPC	Arteria	c5.bp	GO_NUCLEIC_ACID_PHOSPHODIESTER_BOND_HYDROLYSIS	http://www.gsea-msigdb.org/gsea/msigdb/cards/GO_NUCLEIC_ACID_PHOSPHODIESTER_BOND_HYDROLYSIS	201	0.80239657738112	0.639456166562377	1
iPSC-CVPC	Heart	c5.bp	GO_NEGATIVE_REGULATION_OF_T_CELL_RECEPTOR_SIGNALING_PATHWAY	http://www.gsea-msigdb.org/gsea/msigdb/cards/GO_NEGATIVE_REGULATION_OF_T_CELL_RECEPTOR_SIGNALING_PATHWAY	16	0	1	1
iPSC-CVPC	Arteria	c5.bp	GO_NEGATIVE_REGULATION_OF_T_CELL_RECEPTOR_SIGNALING_PATHWAY	http://www.gsea-msigdb.org/gsea/msigdb/cards/GO_NEGATIVE_REGULATION_OF_T_CELL_RECEPTOR_SIGNALING_PATHWAY	16	0	1	1
Heart	Arteria	c5.bp	GO_BLOOD_VESSEL_ENDOTHELIAL_CELL_MIGRATION	http://www.gsea-msigdb.org/gsea/msigdb/cards/GO_BLOOD_VESSEL_ENDOTHELIAL_CELL_MIGRATION	79	1.29310818123199	0.54338988727563	1
iPSC-CVPC	Heart	c5.bp	GO_POSITIVE_REGULATION_OF_PROTEIN_LOCALIZATION_TO_NUCLEUS	http://www.gsea-msigdb.org/gsea/msigdb/cards/GO_POSITIVE_REGULATION_OF_PROTEIN_LOCALIZATION_TO_NUCLEUS	45	1.34590988905623	0.662755590345398	1
iPSC-CVPC	Arteria	c5.bp	GO_POSITIVE_REGULATION_OF_PROTEIN_LOCALIZATION_TO_NUCLEUS	http://www.gsea-msigdb.org/gsea/msigdb/cards/GO_POSITIVE_REGULATION_OF_PROTEIN_LOCALIZATION_TO_NUCLEUS	45	1.22844605200743	0.73661172277801	1
Heart	Arteria	c5.bp	GO_POSITIVE_REGULATION_OF_PROTEIN_LOCALIZATION_TO_NUCLEUS	http://www.gsea-msigdb.org/gsea/msigdb/cards/GO_POSITIVE_REGULATION_OF_PROTEIN_LOCALIZATION_TO_NUCLEUS	45	2.29952893892256	0.359702342129745	1
iPSC-CVPC	Arteria	c5.bp	GO_LEUKOCYTE_MIGRATION	http://www.gsea-msigdb.org/gsea/msigdb/cards/GO_LEUKOCYTE_MIGRATION	220	0.559423417375852	0.17550882379895	1
iPSC-CVPC	Heart	c5.bp	GO_ALDITOL_METABOLIC_PROCESS	http://www.gsea-msigdb.org/gsea/msigdb/cards/GO_ALDITOL_METABOLIC_PROCESS	16	0	1	1
iPSC-CVPC	Arteria	c5.bp	GO_ALDITOL_METABOLIC_PROCESS	http://www.gsea-msigdb.org/gsea/msigdb/cards/GO_ALDITOL_METABOLIC_PROCESS	16	2.4592658079527	0.218782451110804	1
Heart	Arteria	c5.bp	GO_ALDITOL_METABOLIC_PROCESS	http://www.gsea-msigdb.org/gsea/msigdb/cards/GO_ALDITOL_METABOLIC_PROCESS	16	0	1	1
iPSC-CVPC	Heart	c5.bp	GO_POSITIVE_REGULATION_OF_MITOCHONDRION_ORGANIZATION	http://www.gsea-msigdb.org/gsea/msigdb/cards/GO_POSITIVE_REGULATION_OF_MITOCHONDRION_ORGANIZATION	75	2.07891470792876	0.105829952273701	1
iPSC-CVPC	Heart	c5.bp	GO_POSITIVE_REGULATION_OF_CATALYTIC_ACTIVITY	http://www.gsea-msigdb.org/gsea/msigdb/cards/GO_POSITIVE_REGULATION_OF_CATALYTIC_ACTIVITY	863	0.966341554886391	1	1
iPSC-CVPC	Arteria	c5.bp	GO_POSITIVE_REGULATION_OF_CATALYTIC_ACTIVITY	http://www.gsea-msigdb.org/gsea/msigdb/cards/GO_POSITIVE_REGULATION_OF_CATALYTIC_ACTIVITY	863	0.893191444612232	0.533511693805772	1
Heart	Arteria	c5.bp	GO_POSITIVE_REGULATION_OF_CATALYTIC_ACTIVITY	http://www.gsea-msigdb.org/gsea/msigdb/cards/GO_POSITIVE_REGULATION_OF_CATALYTIC_ACTIVITY	863	1.76104580121779	0.0681392633709106	1
iPSC-CVPC	Heart	c5.bp	GO_METHYLATION_DEPENDENT_CHROMATIN_SILENCING	http://www.gsea-msigdb.org/gsea/msigdb/cards/GO_METHYLATION_DEPENDENT_CHROMATIN_SILENCING	14	2.22602531482241	0.379103397863552	1
iPSC-CVPC	Heart	c5.bp	GO_HORMONE_MEDIATED_SIGNALING_PATHWAY	http://www.gsea-msigdb.org/gsea/msigdb/cards/GO_HORMONE_MEDIATED_SIGNALING_PATHWAY	129	0.923836276242166	1	1
Heart	Arteria	c5.bp	GO_HORMONE_MEDIATED_SIGNALING_PATHWAY	http://www.gsea-msigdb.org/gsea/msigdb/cards/GO_HORMONE_MEDIATED_SIGNALING_PATHWAY	129	0.784270510937887	1	1
iPSC-CVPC	Heart	c5.bp	GO_HEMIDESMOSOME_ASSEMBLY	http://www.gsea-msigdb.org/gsea/msigdb/cards/GO_HEMIDESMOSOME_ASSEMBLY	9	0	1	1
iPSC-CVPC	Arteria	c5.bp	GO_HEMIDESMOSOME_ASSEMBLY	http://www.gsea-msigdb.org/gsea/msigdb/cards/GO_HEMIDESMOSOME_ASSEMBLY	9	2.14962403857217	0.399093657395531	1
iPSC-CVPC	Heart	c5.bp	GO_POSITIVE_REGULATION_OF_STRIATED_MUSCLE_CONTRACTION	http://www.gsea-msigdb.org/gsea/msigdb/cards/GO_POSITIVE_REGULATION_OF_STRIATED_MUSCLE_CONTRACTION	6	0	1	1
iPSC-CVPC	Arteria	c5.bp	GO_CEREBRAL_CORTEX_NEURON_DIFFERENTIATION	http://www.gsea-msigdb.org/gsea/msigdb/cards/GO_CEREBRAL_CORTEX_NEURON_DIFFERENTIATION	8	0	1	1
iPSC-CVPC	Heart	c5.bp	GO_REGULATION_OF_VENTRICULAR_CARDIAC_MUSCLE_CELL_ACTION_POTENTIAL	http://www.gsea-msigdb.org/gsea/msigdb/cards/GO_REGULATION_OF_VENTRICULAR_CARDIAC_MUSCLE_CELL_ACTION_POTENTIAL	12	2.6311276912316	0.335331830253007	1
iPSC-CVPC	Arteria	c5.bp	GO_REGULATION_OF_VENTRICULAR_CARDIAC_MUSCLE_CELL_ACTION_POTENTIAL	http://www.gsea-msigdb.org/gsea/msigdb/cards/GO_REGULATION_OF_VENTRICULAR_CARDIAC_MUSCLE_CELL_ACTION_POTENTIAL	12	1.56288361152648	0.492970723871524	1
Heart	Arteria	c5.bp	GO_REGULATION_OF_VENTRICULAR_CARDIAC_MUSCLE_CELL_ACTION_POTENTIAL	http://www.gsea-msigdb.org/gsea/msigdb/cards/GO_REGULATION_OF_VENTRICULAR_CARDIAC_MUSCLE_CELL_ACTION_POTENTIAL	12	0	1	1
iPSC-CVPC	Arteria	c5.bp	GO_REGULATION_OF_MYOBLAST_DIFFERENTIATION	http://www.gsea-msigdb.org/gsea/msigdb/cards/GO_REGULATION_OF_MYOBLAST_DIFFERENTIATION	27	0	0.400120465084982	1
Heart	Arteria	c5.bp	GO_REGULATION_OF_MYOBLAST_DIFFERENTIATION	http://www.gsea-msigdb.org/gsea/msigdb/cards/GO_REGULATION_OF_MYOBLAST_DIFFERENTIATION	27	0	1	1
Heart	Arteria	c5.bp	GO_NEPHRIC_DUCT_DEVELOPMENT	http://www.gsea-msigdb.org/gsea/msigdb/cards/GO_NEPHRIC_DUCT_DEVELOPMENT	11	0	1	1
iPSC-CVPC	Heart	c5.bp	GO_REGULATION_OF_HEMOPOIESIS	http://www.gsea-msigdb.org/gsea/msigdb/cards/GO_REGULATION_OF_HEMOPOIESIS	265	1.01629961643067	0.863098095399501	1
iPSC-CVPC	Arteria	c5.bp	GO_REGULATION_OF_HEMOPOIESIS	http://www.gsea-msigdb.org/gsea/msigdb/cards/GO_REGULATION_OF_HEMOPOIESIS	265	0.811113704870886	0.584965600879487	1
Heart	Arteria	c5.bp	GO_REGULATION_OF_HEMOPOIESIS	http://www.gsea-msigdb.org/gsea/msigdb/cards/GO_REGULATION_OF_HEMOPOIESIS	265	0.37531382497064	0.524616129623518	1
iPSC-CVPC	Arteria	c5.bp	GO_POSITIVE_REGULATION_OF_CALCIUM_MEDIATED_SIGNALING	http://www.gsea-msigdb.org/gsea/msigdb/cards/GO_POSITIVE_REGULATION_OF_CALCIUM_MEDIATED_SIGNALING	25	2.34976537369778	0.155922298823391	1
iPSC-CVPC	Heart	c5.bp	GO_REGULATION_OF_GLYCOPROTEIN_METABOLIC_PROCESS	http://www.gsea-msigdb.org/gsea/msigdb/cards/GO_REGULATION_OF_GLYCOPROTEIN_METABOLIC_PROCESS	28	1.07039768170171	0.614732962562752	1
Heart	Arteria	c5.bp	GO_REGULATION_OF_BEHAVIOR	http://www.gsea-msigdb.org/gsea/msigdb/cards/GO_REGULATION_OF_BEHAVIOR	26	0	1	1
iPSC-CVPC	Heart	c5.bp	GO_POSITIVE_REGULATION_OF_PROTEIN_TYROSINE_KINASE_ACTIVITY	http://www.gsea-msigdb.org/gsea/msigdb/cards/GO_POSITIVE_REGULATION_OF_PROTEIN_TYROSINE_KINASE_ACTIVITY	33	0.902746673712149	1	1
Heart	Arteria	c5.bp	GO_POSITIVE_REGULATION_OF_PROTEIN_TYROSINE_KINASE_ACTIVITY	http://www.gsea-msigdb.org/gsea/msigdb/cards/GO_POSITIVE_REGULATION_OF_PROTEIN_TYROSINE_KINASE_ACTIVITY	33	0	1	1
iPSC-CVPC	Heart	c5.bp	GO_INNATE_IMMUNE_RESPONSE_ACTIVATING_CELL_SURFACE_RECEPTOR_SIGNALING_PATHWAY	http://www.gsea-msigdb.org/gsea/msigdb/cards/GO_INNATE_IMMUNE_RESPONSE_ACTIVATING_CELL_SURFACE_RECEPTOR_SIGNALING_PATHWAY	66	0.902472652621675	1	1
Heart	Arteria	c5.bp	GO_BONE_DEVELOPMENT	http://www.gsea-msigdb.org/gsea/msigdb/cards/GO_BONE_DEVELOPMENT	128	0	0.63962858289065	1
iPSC-CVPC	Heart	c5.bp	GO_SMOOTH_MUSCLE_TISSUE_DEVELOPMENT	http://www.gsea-msigdb.org/gsea/msigdb/cards/GO_SMOOTH_MUSCLE_TISSUE_DEVELOPMENT	13	0	1	1
iPSC-CVPC	Arteria	c5.bp	GO_SMOOTH_MUSCLE_TISSUE_DEVELOPMENT	http://www.gsea-msigdb.org/gsea/msigdb/cards/GO_SMOOTH_MUSCLE_TISSUE_DEVELOPMENT	13	1.4325200938926	0.520888009781609	1
Heart	Arteria	c5.bp	GO_SMOOTH_MUSCLE_TISSUE_DEVELOPMENT	http://www.gsea-msigdb.org/gsea/msigdb/cards/GO_SMOOTH_MUSCLE_TISSUE_DEVELOPMENT	13	0	1	1
iPSC-CVPC	Heart	c5.bp	GO_NEGATIVE_REGULATION_OF_HEMATOPOIETIC_PROGENITOR_CELL_DIFFERENTIATION	http://www.gsea-msigdb.org/gsea/msigdb/cards/GO_NEGATIVE_REGULATION_OF_HEMATOPOIETIC_PROGENITOR_CELL_DIFFERENTIATION	4	0	1	1
iPSC-CVPC	Arteria	c5.bp	GO_NEGATIVE_REGULATION_OF_HEMATOPOIETIC_PROGENITOR_CELL_DIFFERENTIATION	http://www.gsea-msigdb.org/gsea/msigdb/cards/GO_NEGATIVE_REGULATION_OF_HEMATOPOIETIC_PROGENITOR_CELL_DIFFERENTIATION	4	5.73347995452449	0.202527703020063	1
iPSC-CVPC	Heart	c5.bp	GO_AMINE_METABOLIC_PROCESS	http://www.gsea-msigdb.org/gsea/msigdb/cards/GO_AMINE_METABOLIC_PROCESS	67	0.888502835074693	1	1
iPSC-CVPC	Arteria	c5.bp	GO_AMINE_METABOLIC_PROCESS	http://www.gsea-msigdb.org/gsea/msigdb/cards/GO_AMINE_METABOLIC_PROCESS	67	1.38891871475297	0.417770536410186	1
Heart	Arteria	c5.bp	GO_AMINE_METABOLIC_PROCESS	http://www.gsea-msigdb.org/gsea/msigdb/cards/GO_AMINE_METABOLIC_PROCESS	67	1.52990293403545	0.485454078519188	1
iPSC-CVPC	Arteria	c5.bp	GO_DNA_MODIFICATION	http://www.gsea-msigdb.org/gsea/msigdb/cards/GO_DNA_MODIFICATION	70	1.61704292326955	0.282286708741779	1
Heart	Arteria	c5.bp	GO_DNA_MODIFICATION	http://www.gsea-msigdb.org/gsea/msigdb/cards/GO_DNA_MODIFICATION	70	0	1	1
iPSC-CVPC	Heart	c5.bp	GO_RESPONSE_TO_ALKALOID	http://www.gsea-msigdb.org/gsea/msigdb/cards/GO_RESPONSE_TO_ALKALOID	63	1.96977516478908	0.159288712558981	1
iPSC-CVPC	Arteria	c5.bp	GO_RESPONSE_TO_ALKALOID	http://www.gsea-msigdb.org/gsea/msigdb/cards/GO_RESPONSE_TO_ALKALOID	63	2.16141295060966	0.0847224779886781	1
iPSC-CVPC	Heart	c5.bp	GO_REGULATION_OF_MESENCHYMAL_CELL_PROLIFERATION	http://www.gsea-msigdb.org/gsea/msigdb/cards/GO_REGULATION_OF_MESENCHYMAL_CELL_PROLIFERATION	24	0	1	1
iPSC-CVPC	Arteria	c5.bp	GO_REGULATION_OF_MESENCHYMAL_CELL_PROLIFERATION	http://www.gsea-msigdb.org/gsea/msigdb/cards/GO_REGULATION_OF_MESENCHYMAL_CELL_PROLIFERATION	24	0.746635419487616	1	1
Heart	Arteria	c5.bp	GO_REGULATION_OF_CELL_PROJECTION_ORGANIZATION	http://www.gsea-msigdb.org/gsea/msigdb/cards/GO_REGULATION_OF_CELL_PROJECTION_ORGANIZATION	421	1.48264267511166	0.310475963335965	1
iPSC-CVPC	Heart	c5.bp	GO_EATING_BEHAVIOR	http://www.gsea-msigdb.org/gsea/msigdb/cards/GO_EATING_BEHAVIOR	6	0	1	1
iPSC-CVPC	Arteria	c5.bp	GO_EATING_BEHAVIOR	http://www.gsea-msigdb.org/gsea/msigdb/cards/GO_EATING_BEHAVIOR	6	0	1	1
iPSC-CVPC	Heart	c5.bp	GO_FOLIC_ACID_CONTAINING_COMPOUND_BIOSYNTHETIC_PROCESS	http://www.gsea-msigdb.org/gsea/msigdb/cards/GO_FOLIC_ACID_CONTAINING_COMPOUND_BIOSYNTHETIC_PROCESS	9	0	1	1
iPSC-CVPC	Arteria	c5.bp	GO_FOLIC_ACID_CONTAINING_COMPOUND_BIOSYNTHETIC_PROCESS	http://www.gsea-msigdb.org/gsea/msigdb/cards/GO_FOLIC_ACID_CONTAINING_COMPOUND_BIOSYNTHETIC_PROCESS	9	0	1	1
iPSC-CVPC	Heart	c5.bp	GO_EAR_DEVELOPMENT	http://www.gsea-msigdb.org/gsea/msigdb/cards/GO_EAR_DEVELOPMENT	104	0.278545665686278	0.267560041978463	1
iPSC-CVPC	Heart	c5.bp	GO_NEGATIVE_REGULATION_OF_CELL_MATRIX_ADHESION	http://www.gsea-msigdb.org/gsea/msigdb/cards/GO_NEGATIVE_REGULATION_OF_CELL_MATRIX_ADHESION	26	0	1	1
iPSC-CVPC	Arteria	c5.bp	GO_NEGATIVE_REGULATION_OF_CELL_MATRIX_ADHESION	http://www.gsea-msigdb.org/gsea/msigdb/cards/GO_NEGATIVE_REGULATION_OF_CELL_MATRIX_ADHESION	26	3.13804684733073	0.0517290997205429	1
iPSC-CVPC	Arteria	c5.bp	GO_VESICLE_DOCKING_INVOLVED_IN_EXOCYTOSIS	http://www.gsea-msigdb.org/gsea/msigdb/cards/GO_VESICLE_DOCKING_INVOLVED_IN_EXOCYTOSIS	28	0	0.402376662156301	1
iPSC-CVPC	Heart	c5.bp	GO_POSITIVE_REGULATION_OF_MOLECULAR_FUNCTION	http://www.gsea-msigdb.org/gsea/msigdb/cards/GO_POSITIVE_REGULATION_OF_MOLECULAR_FUNCTION	1076	1.16343154825248	0.370905060642941	1
iPSC-CVPC	Arteria	c5.bp	GO_POSITIVE_REGULATION_OF_MOLECULAR_FUNCTION	http://www.gsea-msigdb.org/gsea/msigdb/cards/GO_POSITIVE_REGULATION_OF_MOLECULAR_FUNCTION	1076	1.11768925100491	0.397850579288454	1
iPSC-CVPC	Heart	c5.bp	GO_REGULATION_OF_T_CELL_TOLERANCE_INDUCTION	http://www.gsea-msigdb.org/gsea/msigdb/cards/GO_REGULATION_OF_T_CELL_TOLERANCE_INDUCTION	2	0	1	1
iPSC-CVPC	Arteria	c5.bp	GO_REGULATION_OF_T_CELL_TOLERANCE_INDUCTION	http://www.gsea-msigdb.org/gsea/msigdb/cards/GO_REGULATION_OF_T_CELL_TOLERANCE_INDUCTION	2	17.194955231514	0.106977213866598	1
iPSC-CVPC	Heart	c5.bp	GO_DEFENSE_RESPONSE_TO_OTHER_ORGANISM	http://www.gsea-msigdb.org/gsea/msigdb/cards/GO_DEFENSE_RESPONSE_TO_OTHER_ORGANISM	536	1.31586100307114	0.216289729989462	1
iPSC-CVPC	Arteria	c5.bp	GO_DEFENSE_RESPONSE_TO_OTHER_ORGANISM	http://www.gsea-msigdb.org/gsea/msigdb/cards/GO_DEFENSE_RESPONSE_TO_OTHER_ORGANISM	536	1.1348280300889	0.495512340857635	1
Heart	Arteria	c5.bp	GO_DEFENSE_RESPONSE_TO_OTHER_ORGANISM	http://www.gsea-msigdb.org/gsea/msigdb/cards/GO_DEFENSE_RESPONSE_TO_OTHER_ORGANISM	536	0.945107961598045	1	1
Heart	Arteria	c5.bp	GO_LEUKOCYTE_PROLIFERATION	http://www.gsea-msigdb.org/gsea/msigdb/cards/GO_LEUKOCYTE_PROLIFERATION	141	0	0.651045254289532	1
iPSC-CVPC	Heart	c5.bp	GO_NEGATIVE_REGULATION_OF_POTASSIUM_ION_TRANSPORT	http://www.gsea-msigdb.org/gsea/msigdb/cards/GO_NEGATIVE_REGULATION_OF_POTASSIUM_ION_TRANSPORT	14	2.22602531482241	0.379103397863552	1
iPSC-CVPC	Arteria	c5.bp	GO_NEGATIVE_REGULATION_OF_POTASSIUM_ION_TRANSPORT	http://www.gsea-msigdb.org/gsea/msigdb/cards/GO_NEGATIVE_REGULATION_OF_POTASSIUM_ION_TRANSPORT	14	2.86962114925967	0.177913938735029	1
Heart	Arteria	c5.bp	GO_NEGATIVE_REGULATION_OF_POTASSIUM_ION_TRANSPORT	http://www.gsea-msigdb.org/gsea/msigdb/cards/GO_NEGATIVE_REGULATION_OF_POTASSIUM_ION_TRANSPORT	14	0	1	1
iPSC-CVPC	Heart	c5.bp	GO_REGULATION_OF_T_CELL_APOPTOTIC_PROCESS	http://www.gsea-msigdb.org/gsea/msigdb/cards/GO_REGULATION_OF_T_CELL_APOPTOTIC_PROCESS	18	0	1	1
iPSC-CVPC	Arteria	c5.bp	GO_REGULATION_OF_T_CELL_APOPTOTIC_PROCESS	http://www.gsea-msigdb.org/gsea/msigdb/cards/GO_REGULATION_OF_T_CELL_APOPTOTIC_PROCESS	18	0	0.621256050943545	1
Heart	Arteria	c5.bp	GO_REGULATION_OF_T_CELL_APOPTOTIC_PROCESS	http://www.gsea-msigdb.org/gsea/msigdb/cards/GO_REGULATION_OF_T_CELL_APOPTOTIC_PROCESS	18	0	1	1
iPSC-CVPC	Arteria	c5.bp	GO_NEGATIVE_REGULATION_OF_MEIOTIC_CELL_CYCLE	http://www.gsea-msigdb.org/gsea/msigdb/cards/GO_NEGATIVE_REGULATION_OF_MEIOTIC_CELL_CYCLE	6	0	1	1
Heart	Arteria	c5.bp	GO_NEGATIVE_REGULATION_OF_MEIOTIC_CELL_CYCLE	http://www.gsea-msigdb.org/gsea/msigdb/cards/GO_NEGATIVE_REGULATION_OF_MEIOTIC_CELL_CYCLE	6	0	1	1
iPSC-CVPC	Heart	c5.bp	GO_MESENCHYMAL_CELL_DIFFERENTIATION	http://www.gsea-msigdb.org/gsea/msigdb/cards/GO_MESENCHYMAL_CELL_DIFFERENTIATION	134	0	0.0245542973644544	1
iPSC-CVPC	Heart	c5.bp	GO_SHORT_CHAIN_FATTY_ACID_METABOLIC_PROCESS	http://www.gsea-msigdb.org/gsea/msigdb/cards/GO_SHORT_CHAIN_FATTY_ACID_METABOLIC_PROCESS	12	2.6311276912316	0.335331830253007	1
iPSC-CVPC	Arteria	c5.bp	GO_SHORT_CHAIN_FATTY_ACID_METABOLIC_PROCESS	http://www.gsea-msigdb.org/gsea/msigdb/cards/GO_SHORT_CHAIN_FATTY_ACID_METABOLIC_PROCESS	12	3.44407057775882	0.138477997216538	1
iPSC-CVPC	Heart	c5.bp	GO_EMBRYONIC_FORELIMB_MORPHOGENESIS	http://www.gsea-msigdb.org/gsea/msigdb/cards/GO_EMBRYONIC_FORELIMB_MORPHOGENESIS	17	0	1	1
Heart	Arteria	c5.bp	GO_CELL_DIFFERENTIATION_INVOLVED_IN_KIDNEY_DEVELOPMENT	http://www.gsea-msigdb.org/gsea/msigdb/cards/GO_CELL_DIFFERENTIATION_INVOLVED_IN_KIDNEY_DEVELOPMENT	28	0	1	1
iPSC-CVPC	Arteria	c5.bp	GO_MUSCLE_STRUCTURE_DEVELOPMENT	http://www.gsea-msigdb.org/gsea/msigdb/cards/GO_MUSCLE_STRUCTURE_DEVELOPMENT	395	0.913443115698379	0.821751139284558	1
Heart	Arteria	c5.bp	GO_NEGATIVE_REGULATION_OF_CELL_CYCLE_PROCESS	http://www.gsea-msigdb.org/gsea/msigdb/cards/GO_NEGATIVE_REGULATION_OF_CELL_CYCLE_PROCESS	221	1.39631074492721	0.48097439012903	1
iPSC-CVPC	Heart	c5.bp	GO_REGULATION_OF_CHROMATIN_SILENCING	http://www.gsea-msigdb.org/gsea/msigdb/cards/GO_REGULATION_OF_CHROMATIN_SILENCING	17	0	1	1
iPSC-CVPC	Arteria	c5.bp	GO_REGULATION_OF_CHROMATIN_SILENCING	http://www.gsea-msigdb.org/gsea/msigdb/cards/GO_REGULATION_OF_CHROMATIN_SILENCING	17	3.69479065418901	0.063313307821517	1
Heart	Arteria	c5.bp	GO_REGULATION_OF_CHROMATIN_SILENCING	http://www.gsea-msigdb.org/gsea/msigdb/cards/GO_REGULATION_OF_CHROMATIN_SILENCING	17	0	1	1
iPSC-CVPC	Arteria	c5.bp	GO_RIBOSOMAL_LARGE_SUBUNIT_ASSEMBLY	http://www.gsea-msigdb.org/gsea/msigdb/cards/GO_RIBOSOMAL_LARGE_SUBUNIT_ASSEMBLY	15	1.22766633681219	0.572202813746029	1
Heart	Arteria	c5.bp	GO_RIBOSOMAL_LARGE_SUBUNIT_ASSEMBLY	http://www.gsea-msigdb.org/gsea/msigdb/cards/GO_RIBOSOMAL_LARGE_SUBUNIT_ASSEMBLY	15	0	1	1
iPSC-CVPC	Heart	c5.bp	GO_MAINTENANCE_OF_LOCATION_IN_CELL	http://www.gsea-msigdb.org/gsea/msigdb/cards/GO_MAINTENANCE_OF_LOCATION_IN_CELL	57	2.80329798874035	0.0412666031124952	1
iPSC-CVPC	Arteria	c5.bp	GO_MAINTENANCE_OF_LOCATION_IN_CELL	http://www.gsea-msigdb.org/gsea/msigdb/cards/GO_MAINTENANCE_OF_LOCATION_IN_CELL	57	0.954341613867919	1	1
Heart	Arteria	c5.bp	GO_REGULATION_OF_MESODERM_DEVELOPMENT	http://www.gsea-msigdb.org/gsea/msigdb/cards/GO_REGULATION_OF_MESODERM_DEVELOPMENT	6	0	1	1
Heart	Arteria	c5.bp	GO_T_HELPER_1_TYPE_IMMUNE_RESPONSE	http://www.gsea-msigdb.org/gsea/msigdb/cards/GO_T_HELPER_1_TYPE_IMMUNE_RESPONSE	22	0	1	1
iPSC-CVPC	Heart	c5.bp	GO_POSITIVE_REGULATION_OF_TYPE_2_IMMUNE_RESPONSE	http://www.gsea-msigdb.org/gsea/msigdb/cards/GO_POSITIVE_REGULATION_OF_TYPE_2_IMMUNE_RESPONSE	9	0	1	1
iPSC-CVPC	Arteria	c5.bp	GO_POSITIVE_REGULATION_OF_TYPE_2_IMMUNE_RESPONSE	http://www.gsea-msigdb.org/gsea/msigdb/cards/GO_POSITIVE_REGULATION_OF_TYPE_2_IMMUNE_RESPONSE	9	0	1	1
iPSC-CVPC	Heart	c5.bp	GO_CELLULAR_RESPONSE_TO_OXYGEN_LEVELS	http://www.gsea-msigdb.org/gsea/msigdb/cards/GO_CELLULAR_RESPONSE_TO_OXYGEN_LEVELS	136	1.33933829052165	0.465234004140959	1
iPSC-CVPC	Arteria	c5.bp	GO_CELLULAR_RESPONSE_TO_HORMONE_STIMULUS	http://www.gsea-msigdb.org/gsea/msigdb/cards/GO_CELLULAR_RESPONSE_TO_HORMONE_STIMULUS	366	1.10268681903523	0.640304499679563	1
iPSC-CVPC	Heart	c5.bp	GO_DNA_REPAIR	http://www.gsea-msigdb.org/gsea/msigdb/cards/GO_DNA_REPAIR	376	1.20945663694669	0.463744255357269	1
iPSC-CVPC	Arteria	c5.bp	GO_DNA_REPAIR	http://www.gsea-msigdb.org/gsea/msigdb/cards/GO_DNA_REPAIR	376	1.34511530364943	0.165190605989919	1
iPSC-CVPC	Heart	c5.bp	GO_PROTEIN_POLYMERIZATION	http://www.gsea-msigdb.org/gsea/msigdb/cards/GO_PROTEIN_POLYMERIZATION	170	1.43669024438239	0.282288662995646	1
iPSC-CVPC	Arteria	c5.bp	GO_PROTEIN_POLYMERIZATION	http://www.gsea-msigdb.org/gsea/msigdb/cards/GO_PROTEIN_POLYMERIZATION	170	1.80701279801372	0.0388719255541968	1
iPSC-CVPC	Heart	c5.bp	GO_CELLULAR_RESPONSE_TO_CORTICOSTEROID_STIMULUS	http://www.gsea-msigdb.org/gsea/msigdb/cards/GO_CELLULAR_RESPONSE_TO_CORTICOSTEROID_STIMULUS	26	1.15627400163101	0.587535071050246	1
iPSC-CVPC	Arteria	c5.bp	GO_CELLULAR_RESPONSE_TO_CORTICOSTEROID_STIMULUS	http://www.gsea-msigdb.org/gsea/msigdb/cards/GO_CELLULAR_RESPONSE_TO_CORTICOSTEROID_STIMULUS	26	0.686769395472494	1	1
iPSC-CVPC	Heart	c5.bp	GO_REGULATION_OF_ADHERENS_JUNCTION_ORGANIZATION	http://www.gsea-msigdb.org/gsea/msigdb/cards/GO_REGULATION_OF_ADHERENS_JUNCTION_ORGANIZATION	6	0	1	1
iPSC-CVPC	Arteria	c5.bp	GO_REGULATION_OF_ADHERENS_JUNCTION_ORGANIZATION	http://www.gsea-msigdb.org/gsea/msigdb/cards/GO_REGULATION_OF_ADHERENS_JUNCTION_ORGANIZATION	6	0	1	1
iPSC-CVPC	Heart	c5.bp	GO_PROTEIN_KINASE_C_ACTIVATING_G_PROTEIN_COUPLED_RECEPTOR_SIGNALING_PATHWAY	http://www.gsea-msigdb.org/gsea/msigdb/cards/GO_PROTEIN_KINASE_C_ACTIVATING_G_PROTEIN_COUPLED_RECEPTOR_SIGNALING_PATHWAY	12	2.6311276912316	0.335331830253007	1
iPSC-CVPC	Arteria	c5.bp	GO_PROTEIN_KINASE_C_ACTIVATING_G_PROTEIN_COUPLED_RECEPTOR_SIGNALING_PATHWAY	http://www.gsea-msigdb.org/gsea/msigdb/cards/GO_PROTEIN_KINASE_C_ACTIVATING_G_PROTEIN_COUPLED_RECEPTOR_SIGNALING_PATHWAY	12	3.44407057775882	0.138477997216538	1
iPSC-CVPC	Heart	c5.bp	GO_REGULATION_OF_CALCIUM_ION_TRANSMEMBRANE_TRANSPORT	http://www.gsea-msigdb.org/gsea/msigdb/cards/GO_REGULATION_OF_CALCIUM_ION_TRANSMEMBRANE_TRANSPORT	78	1.99293513496727	0.189427359777073	1
Heart	Arteria	c5.bp	GO_REGULATION_OF_CALCIUM_ION_TRANSMEMBRANE_TRANSPORT	http://www.gsea-msigdb.org/gsea/msigdb/cards/GO_REGULATION_OF_CALCIUM_ION_TRANSMEMBRANE_TRANSPORT	78	2.68013951701344	0.178789994674786	1
Heart	Arteria	c5.bp	GO_POSITIVE_REGULATION_OF_LEUKOCYTE_MIGRATION	http://www.gsea-msigdb.org/gsea/msigdb/cards/GO_POSITIVE_REGULATION_OF_LEUKOCYTE_MIGRATION	73	0	1	1
iPSC-CVPC	Heart	c5.bp	GO_APOPTOTIC_SIGNALING_PATHWAY	http://www.gsea-msigdb.org/gsea/msigdb/cards/GO_APOPTOTIC_SIGNALING_PATHWAY	366	1.24515945263534	0.375555706194518	1
iPSC-CVPC	Arteria	c5.bp	GO_APOPTOTIC_SIGNALING_PATHWAY	http://www.gsea-msigdb.org/gsea/msigdb/cards/GO_APOPTOTIC_SIGNALING_PATHWAY	366	0.727314953225176	0.292183090278425	1
iPSC-CVPC	Heart	c5.bp	GO_NEURAL_NUCLEUS_DEVELOPMENT	http://www.gsea-msigdb.org/gsea/msigdb/cards/GO_NEURAL_NUCLEUS_DEVELOPMENT	29	1.03211027703323	1	1
iPSC-CVPC	Arteria	c5.bp	GO_NEURAL_NUCLEUS_DEVELOPMENT	http://www.gsea-msigdb.org/gsea/msigdb/cards/GO_NEURAL_NUCLEUS_DEVELOPMENT	29	1.27366032105861	0.67258211840505	1
Heart	Arteria	c5.bp	GO_NEURAL_NUCLEUS_DEVELOPMENT	http://www.gsea-msigdb.org/gsea/msigdb/cards/GO_NEURAL_NUCLEUS_DEVELOPMENT	29	0	1	1
iPSC-CVPC	Heart	c5.bp	GO_LYMPHOCYTE_MEDIATED_IMMUNITY	http://www.gsea-msigdb.org/gsea/msigdb/cards/GO_LYMPHOCYTE_MEDIATED_IMMUNITY	117	1.29409839200705	0.598317434986723	1
iPSC-CVPC	Arteria	c5.bp	GO_LYMPHOCYTE_MEDIATED_IMMUNITY	http://www.gsea-msigdb.org/gsea/msigdb/cards/GO_LYMPHOCYTE_MEDIATED_IMMUNITY	117	0.765074004222388	0.686250245471301	1
Heart	Arteria	c5.bp	GO_LYMPHOCYTE_MEDIATED_IMMUNITY	http://www.gsea-msigdb.org/gsea/msigdb/cards/GO_LYMPHOCYTE_MEDIATED_IMMUNITY	117	0.866390098090872	1	1
iPSC-CVPC	Arteria	c5.bp	GO_REGULATION_OF_HEART_MORPHOGENESIS	http://www.gsea-msigdb.org/gsea/msigdb/cards/GO_REGULATION_OF_HEART_MORPHOGENESIS	26	0.686769395472494	1	1
Heart	Arteria	c5.bp	GO_REGULATION_OF_HEART_MORPHOGENESIS	http://www.gsea-msigdb.org/gsea/msigdb/cards/GO_REGULATION_OF_HEART_MORPHOGENESIS	26	0	1	1
Heart	Arteria	c5.bp	GO_S_ADENOSYLMETHIONINE_METABOLIC_PROCESS	http://www.gsea-msigdb.org/gsea/msigdb/cards/GO_S_ADENOSYLMETHIONINE_METABOLIC_PROCESS	12	0	1	1
iPSC-CVPC	Arteria	c5.bp	GO_REGULATION_OF_PROTEIN_LOCALIZATION_TO_CELL_SURFACE	http://www.gsea-msigdb.org/gsea/msigdb/cards/GO_REGULATION_OF_PROTEIN_LOCALIZATION_TO_CELL_SURFACE	30	1.22805552807341	0.67993925153734	1
iPSC-CVPC	Heart	c5.bp	GO_NEGATIVE_REGULATION_OF_AMINE_TRANSPORT	http://www.gsea-msigdb.org/gsea/msigdb/cards/GO_NEGATIVE_REGULATION_OF_AMINE_TRANSPORT	4	0	1	1
iPSC-CVPC	Arteria	c5.bp	GO_NEGATIVE_REGULATION_OF_AMINE_TRANSPORT	http://www.gsea-msigdb.org/gsea/msigdb/cards/GO_NEGATIVE_REGULATION_OF_AMINE_TRANSPORT	4	0	1	1
Heart	Arteria	c5.bp	GO_NEGATIVE_REGULATION_OF_AMINE_TRANSPORT	http://www.gsea-msigdb.org/gsea/msigdb/cards/GO_NEGATIVE_REGULATION_OF_AMINE_TRANSPORT	4	0	1	1
iPSC-CVPC	Arteria	c5.bp	GO_DETECTION_OF_CHEMICAL_STIMULUS_INVOLVED_IN_SENSORY_PERCEPTION_OF_TASTE	http://www.gsea-msigdb.org/gsea/msigdb/cards/GO_DETECTION_OF_CHEMICAL_STIMULUS_INVOLVED_IN_SENSORY_PERCEPTION_OF_TASTE	1	0	1	1
iPSC-CVPC	Arteria	c5.bp	GO_SPHINGOLIPID_METABOLIC_PROCESS	http://www.gsea-msigdb.org/gsea/msigdb/cards/GO_SPHINGOLIPID_METABOLIC_PROCESS	84	0.417117647228044	0.330321925301504	1
Heart	Arteria	c5.bp	GO_SPHINGOLIPID_METABOLIC_PROCESS	http://www.gsea-msigdb.org/gsea/msigdb/cards/GO_SPHINGOLIPID_METABOLIC_PROCESS	84	1.21463974655641	0.565577805716785	1
iPSC-CVPC	Heart	c5.bp	GO_REGULATION_OF_NUCLEOCYTOPLASMIC_TRANSPORT	http://www.gsea-msigdb.org/gsea/msigdb/cards/GO_REGULATION_OF_NUCLEOCYTOPLASMIC_TRANSPORT	74	1.22281836238567	0.738445790973136	1
iPSC-CVPC	Arteria	c5.bp	GO_REGULATION_OF_NUCLEOCYTOPLASMIC_TRANSPORT	http://www.gsea-msigdb.org/gsea/msigdb/cards/GO_REGULATION_OF_NUCLEOCYTOPLASMIC_TRANSPORT	74	1.52132154597334	0.301025325630189	1
iPSC-CVPC	Heart	c5.bp	GO_POSITIVE_REGULATION_OF_INTERFERON_BETA_PRODUCTION	http://www.gsea-msigdb.org/gsea/msigdb/cards/GO_POSITIVE_REGULATION_OF_INTERFERON_BETA_PRODUCTION	19	0	1	1
iPSC-CVPC	Arteria	c5.bp	GO_POSITIVE_REGULATION_OF_INTERFERON_BETA_PRODUCTION	http://www.gsea-msigdb.org/gsea/msigdb/cards/GO_POSITIVE_REGULATION_OF_INTERFERON_BETA_PRODUCTION	19	2.02475617469779	0.281157362561673	1
iPSC-CVPC	Heart	c5.bp	GO_REGULATION_OF_PEPTIDYL_TYROSINE_PHOSPHORYLATION	http://www.gsea-msigdb.org/gsea/msigdb/cards/GO_REGULATION_OF_PEPTIDYL_TYROSINE_PHOSPHORYLATION	148	0.594465675981301	0.492246679238348	1
iPSC-CVPC	Arteria	c5.bp	GO_NEGATIVE_REGULATION_OF_CYTOKINE_BIOSYNTHETIC_PROCESS	http://www.gsea-msigdb.org/gsea/msigdb/cards/GO_NEGATIVE_REGULATION_OF_CYTOKINE_BIOSYNTHETIC_PROCESS	19	0	0.622201972793475	1
Heart	Arteria	c5.bp	GO_NEGATIVE_REGULATION_OF_CYTOKINE_BIOSYNTHETIC_PROCESS	http://www.gsea-msigdb.org/gsea/msigdb/cards/GO_NEGATIVE_REGULATION_OF_CYTOKINE_BIOSYNTHETIC_PROCESS	19	0	1	1
iPSC-CVPC	Arteria	c5.bp	GO_B_CELL_ACTIVATION	http://www.gsea-msigdb.org/gsea/msigdb/cards/GO_B_CELL_ACTIVATION	123	0.426650517919283	0.163072582790006	1
Heart	Arteria	c5.bp	GO_B_CELL_ACTIVATION	http://www.gsea-msigdb.org/gsea/msigdb/cards/GO_B_CELL_ACTIVATION	123	1.67636923999	0.34179862000297	1
Heart	Arteria	c5.bp	GO_NEGATIVE_REGULATION_OF_INTERFERON_GAMMA_PRODUCTION	http://www.gsea-msigdb.org/gsea/msigdb/cards/GO_NEGATIVE_REGULATION_OF_INTERFERON_GAMMA_PRODUCTION	14	0	1	1
iPSC-CVPC	Heart	c5.bp	GO_REGULATION_OF_FIBRINOLYSIS	http://www.gsea-msigdb.org/gsea/msigdb/cards/GO_REGULATION_OF_FIBRINOLYSIS	4	0	1	1
iPSC-CVPC	Arteria	c5.bp	GO_REGULATION_OF_FIBRINOLYSIS	http://www.gsea-msigdb.org/gsea/msigdb/cards/GO_REGULATION_OF_FIBRINOLYSIS	4	5.73347995452449	0.202527703020063	1
Heart	Arteria	c5.bp	GO_REGULATION_OF_FIBRINOLYSIS	http://www.gsea-msigdb.org/gsea/msigdb/cards/GO_REGULATION_OF_FIBRINOLYSIS	4	0	1	1
iPSC-CVPC	Heart	c5.bp	GO_REGULATION_OF_MRNA_3_END_PROCESSING	http://www.gsea-msigdb.org/gsea/msigdb/cards/GO_REGULATION_OF_MRNA_3_END_PROCESSING	17	0	1	1
iPSC-CVPC	Arteria	c5.bp	GO_REGULATION_OF_MRNA_3_END_PROCESSING	http://www.gsea-msigdb.org/gsea/msigdb/cards/GO_REGULATION_OF_MRNA_3_END_PROCESSING	17	0	1	1
iPSC-CVPC	Heart	c5.bp	GO_ATP_BIOSYNTHETIC_PROCESS	http://www.gsea-msigdb.org/gsea/msigdb/cards/GO_ATP_BIOSYNTHETIC_PROCESS	27	6.64347671386369	0.00179018416194843	0.433976444539538
iPSC-CVPC	Arteria	c5.bp	GO_ATP_BIOSYNTHETIC_PROCESS	http://www.gsea-msigdb.org/gsea/msigdb/cards/GO_ATP_BIOSYNTHETIC_PROCESS	27	0.660290068265155	1	1
Heart	Arteria	c5.bp	GO_ATP_BIOSYNTHETIC_PROCESS	http://www.gsea-msigdb.org/gsea/msigdb/cards/GO_ATP_BIOSYNTHETIC_PROCESS	27	8.1836756151	0.0286772911903857	1
iPSC-CVPC	Heart	c5.bp	GO_ACUTE_INFLAMMATORY_RESPONSE	http://www.gsea-msigdb.org/gsea/msigdb/cards/GO_ACUTE_INFLAMMATORY_RESPONSE	49	0	0.412965550676407	1
iPSC-CVPC	Arteria	c5.bp	GO_ACUTE_INFLAMMATORY_RESPONSE	http://www.gsea-msigdb.org/gsea/msigdb/cards/GO_ACUTE_INFLAMMATORY_RESPONSE	49	0.356890953350497	0.522819650975215	1
iPSC-CVPC	Heart	c5.bp	GO_PHAGOSOME_MATURATION	http://www.gsea-msigdb.org/gsea/msigdb/cards/GO_PHAGOSOME_MATURATION	18	0	1	1
iPSC-CVPC	Arteria	c5.bp	GO_PHAGOSOME_MATURATION	http://www.gsea-msigdb.org/gsea/msigdb/cards/GO_PHAGOSOME_MATURATION	18	0	0.621256050943545	1
iPSC-CVPC	Heart	c5.bp	GO_REGULATION_OF_CELLULAR_RESPONSE_TO_HYPOXIA	http://www.gsea-msigdb.org/gsea/msigdb/cards/GO_REGULATION_OF_CELLULAR_RESPONSE_TO_HYPOXIA	9	0	1	1
iPSC-CVPC	Arteria	c5.bp	GO_REGULATION_OF_CELLULAR_RESPONSE_TO_HYPOXIA	http://www.gsea-msigdb.org/gsea/msigdb/cards/GO_REGULATION_OF_CELLULAR_RESPONSE_TO_HYPOXIA	9	0	1	1
iPSC-CVPC	Arteria	c5.bp	GO_REGULATION_OF_THYMOCYTE_APOPTOTIC_PROCESS	http://www.gsea-msigdb.org/gsea/msigdb/cards/GO_REGULATION_OF_THYMOCYTE_APOPTOTIC_PROCESS	10	0	1	1
Heart	Arteria	c5.bp	GO_REGULATION_OF_THYMOCYTE_APOPTOTIC_PROCESS	http://www.gsea-msigdb.org/gsea/msigdb/cards/GO_REGULATION_OF_THYMOCYTE_APOPTOTIC_PROCESS	10	0	1	1
iPSC-CVPC	Heart	c5.bp	GO_MYELOID_LEUKOCYTE_ACTIVATION	http://www.gsea-msigdb.org/gsea/msigdb/cards/GO_MYELOID_LEUKOCYTE_ACTIVATION	364	1.43638186572102	0.178601746129436	1
iPSC-CVPC	Arteria	c5.bp	GO_MYELOID_LEUKOCYTE_ACTIVATION	http://www.gsea-msigdb.org/gsea/msigdb/cards/GO_MYELOID_LEUKOCYTE_ACTIVATION	364	1.39472070903586	0.101890564667752	1
iPSC-CVPC	Heart	c5.bp	GO_REACTIVE_NITROGEN_SPECIES_METABOLIC_PROCESS	http://www.gsea-msigdb.org/gsea/msigdb/cards/GO_REACTIVE_NITROGEN_SPECIES_METABOLIC_PROCESS	46	0.641155298706426	1	1
iPSC-CVPC	Arteria	c5.bp	GO_REACTIVE_NITROGEN_SPECIES_METABOLIC_PROCESS	http://www.gsea-msigdb.org/gsea/msigdb/cards/GO_REACTIVE_NITROGEN_SPECIES_METABOLIC_PROCESS	46	3.10858799394196	0.0121200362065044	1
iPSC-CVPC	Heart	c5.bp	GO_POSITIVE_REGULATION_OF_CELL_DIVISION	http://www.gsea-msigdb.org/gsea/msigdb/cards/GO_POSITIVE_REGULATION_OF_CELL_DIVISION	39	0.759773223109195	1	1
iPSC-CVPC	Arteria	c5.bp	GO_POSITIVE_REGULATION_OF_CELL_DIVISION	http://www.gsea-msigdb.org/gsea/msigdb/cards/GO_POSITIVE_REGULATION_OF_CELL_DIVISION	39	1.97014644118926	0.164828111903576	1
Heart	Arteria	c5.bp	GO_POSITIVE_REGULATION_OF_CELL_DIVISION	http://www.gsea-msigdb.org/gsea/msigdb/cards/GO_POSITIVE_REGULATION_OF_CELL_DIVISION	39	0	1	1
iPSC-CVPC	Heart	c5.bp	GO_EYELID_DEVELOPMENT_IN_CAMERA_TYPE_EYE	http://www.gsea-msigdb.org/gsea/msigdb/cards/GO_EYELID_DEVELOPMENT_IN_CAMERA_TYPE_EYE	7	0	1	1
iPSC-CVPC	Heart	c5.bp	GO_CYTOSOLIC_CALCIUM_ION_TRANSPORT	http://www.gsea-msigdb.org/gsea/msigdb/cards/GO_CYTOSOLIC_CALCIUM_ION_TRANSPORT	96	1.25923613525276	0.564566998056024	1
iPSC-CVPC	Arteria	c5.bp	GO_CYTOSOLIC_CALCIUM_ION_TRANSPORT	http://www.gsea-msigdb.org/gsea/msigdb/cards/GO_CYTOSOLIC_CALCIUM_ION_TRANSPORT	96	0.943605434597404	1	1
Heart	Arteria	c5.bp	GO_CYTOSOLIC_CALCIUM_ION_TRANSPORT	http://www.gsea-msigdb.org/gsea/msigdb/cards/GO_CYTOSOLIC_CALCIUM_ION_TRANSPORT	96	2.1634236813327	0.24359609698057	1
iPSC-CVPC	Heart	c5.bp	GO_REGULATION_OF_SPINDLE_ORGANIZATION	http://www.gsea-msigdb.org/gsea/msigdb/cards/GO_REGULATION_OF_SPINDLE_ORGANIZATION	24	2.63572214547714	0.190849543763297	1
iPSC-CVPC	Arteria	c5.bp	GO_REGULATION_OF_SPINDLE_ORGANIZATION	http://www.gsea-msigdb.org/gsea/msigdb/cards/GO_REGULATION_OF_SPINDLE_ORGANIZATION	24	2.46176415113193	0.142693572463529	1
iPSC-CVPC	Heart	c5.bp	GO_POSITIVE_REGULATION_OF_CATABOLIC_PROCESS	http://www.gsea-msigdb.org/gsea/msigdb/cards/GO_POSITIVE_REGULATION_OF_CATABOLIC_PROCESS	283	1.40602576574531	0.237819979213988	1
iPSC-CVPC	Arteria	c5.bp	GO_MITOCHONDRIAL_FISSION	http://www.gsea-msigdb.org/gsea/msigdb/cards/GO_MITOCHONDRIAL_FISSION	31	4.15510064115875	0.00610956588570039	0.804935305441026
iPSC-CVPC	Heart	c5.bp	GO_POLYOL_TRANSPORT	http://www.gsea-msigdb.org/gsea/msigdb/cards/GO_POLYOL_TRANSPORT	5	0	1	1
iPSC-CVPC	Arteria	c5.bp	GO_POLYOL_TRANSPORT	http://www.gsea-msigdb.org/gsea/msigdb/cards/GO_POLYOL_TRANSPORT	5	0	1	1
iPSC-CVPC	Heart	c5.bp	GO_REGULATION_OF_CARDIAC_MUSCLE_CONTRACTION_BY_CALCIUM_ION_SIGNALING	http://www.gsea-msigdb.org/gsea/msigdb/cards/GO_REGULATION_OF_CARDIAC_MUSCLE_CONTRACTION_BY_CALCIUM_ION_SIGNALING	20	3.22249745607412	0.142982576158781	1
iPSC-CVPC	Heart	c5.bp	GO_ANTIGEN_PROCESSING_AND_PRESENTATION	http://www.gsea-msigdb.org/gsea/msigdb/cards/GO_ANTIGEN_PROCESSING_AND_PRESENTATION	130	1.40494691216457	0.453570127261097	1
Heart	Arteria	c5.bp	GO_ANTIGEN_PROCESSING_AND_PRESENTATION	http://www.gsea-msigdb.org/gsea/msigdb/cards/GO_ANTIGEN_PROCESSING_AND_PRESENTATION	130	2.41753179158977	0.136220563925237	1
[truncated: 3,205 more rows]
