# Supplementary material for: In heart failure reactivation of RNA-binding proteins drives the transcriptome into a fetal state
Source: bioRxiv preprint, doi:10.1101/2021.04.30.442191, version 1 (2021-05-01)
Supplement: Table S18 [file 442191_file21.csv]

Transcript ID	Gene ID	Gene name	Type	Tissue 1	Tissue 2	Effect size (beta)	Standard error of beta	P-value	FDR (Bonferroni)
	ENSG00000000938.13_6	FGR	Gene	Heart failure (pre-LVAD)	iPSC-CVPC	-2.46782424061723	0.421239437368171	4.67113366993318e-09	9.46932217568854e-05
	ENSG00000002330.13_9	BAD	Gene	Heart failure (pre-LVAD)	iPSC-CVPC	-5.30495357582019	0.898242763975386	3.50675435697007e-09	7.10889243244973e-05
	ENSG00000003249.14_4	DBNDD1	Gene	Heart failure (pre-LVAD)	iPSC-CVPC	-3.52610755392626	0.701463807240694	4.98771714630991e-07	0.0101111001989995
	ENSG00000005007.13_4	UPF1	Gene	Heart failure (pre-LVAD)	iPSC-CVPC	-6.11344822306752	0.860207331856748	1.18637659738008e-12	2.4050226382089e-08
	ENSG00000005448.17_6	WDR54	Gene	Heart failure (pre-LVAD)	iPSC-CVPC	-3.73159667943258	0.647928444927497	8.44770726983025e-09	0.000171251921773999
	ENSG00000006047.13_5	YBX2	Gene	Heart failure (pre-LVAD)	iPSC-CVPC	-2.39035856231103	0.490207554555915	1.08139475730995e-06	0.0219220345201873
	ENSG00000007047.15_6	MARK4	Gene	Heart failure (pre-LVAD)	iPSC-CVPC	-3.92894956719362	0.722956808060384	5.49329122051689e-08	0.00111359999622318
	ENSG00000007255.10_3	TRAPPC6A	Gene	Heart failure (pre-LVAD)	iPSC-CVPC	-3.87850735366279	0.607905145005205	1.76950072523019e-10	3.58713187018664e-06
	ENSG00000008952.17_4	SEC62	Gene	Heart failure (pre-LVAD)	iPSC-CVPC	4.18064016003143	0.616879332122397	1.22629576699615e-11	2.4859467788546e-07
	ENSG00000011009.11_4	LYPLA2	Gene	Heart failure (pre-LVAD)	iPSC-CVPC	-4.17139566580524	0.723972570905601	8.32144220117748e-09	0.00016869227630227
	ENSG00000011198.10_9	ABHD5	Gene	Heart failure (pre-LVAD)	iPSC-CVPC	3.42666381686149	0.629143576205222	5.13553128884999e-08	0.00104107490287567
	ENSG00000011451.21_9	WIZ	Gene	Heart failure (pre-LVAD)	iPSC-CVPC	-6.88528357965517	0.949353532785982	4.0883934410638e-13	8.28799118372453e-09
	ENSG00000013306.16_8	SLC25A39	Gene	Heart failure (pre-LVAD)	iPSC-CVPC	-4.90749720769894	0.957833362128776	2.9985255697032e-07	0.00607861103490233
	ENSG00000014164.7_5	ZC3H3	Gene	Heart failure (pre-LVAD)	iPSC-CVPC	-6.35704499859626	0.788620089052595	7.5689741179801e-16	1.53438243319693e-11
	ENSG00000014216.16_7	CAPN1	Gene	Heart failure (pre-LVAD)	iPSC-CVPC	-5.53587441646654	1.067138053536	2.13033276703151e-07	0.00431861058532628
	ENSG00000014641.20_7	MDH1	Gene	Heart failure (pre-LVAD)	iPSC-CVPC	1.24994933337522	0.264854181969302	2.36556626136934e-06	0.0479547592504793
	ENSG00000015153.14_5	YAF2	Gene	Heart failure (pre-LVAD)	iPSC-CVPC	3.60517427310771	0.487164094436699	1.35848137722667e-13	2.75391344791391e-09
	ENSG00000015532.10_4	XYLT2	Gene	Heart failure (pre-LVAD)	iPSC-CVPC	-6.30715965678264	0.836542773027741	4.7158043535252e-14	9.55987858546628e-10
	ENSG00000016391.11_7	CHDH	Gene	Heart failure (pre-LVAD)	iPSC-CVPC	-1.8843762918185	0.393946560290147	1.72414952228433e-06	0.0349519591157479
	ENSG00000017797.13_5	RALBP1	Gene	Heart failure (pre-LVAD)	iPSC-CVPC	4.17452258053619	0.679813388505628	8.21643217467099e-10	1.6656351304493e-05
	ENSG00000020577.14_5	SAMD4A	Gene	Heart failure (pre-LVAD)	iPSC-CVPC	2.48244161608341	0.486599652465535	3.36776322530649e-07	0.00682712961034132
	ENSG00000022267.19_9	FHL1	Gene	Heart failure (pre-LVAD)	iPSC-CVPC	3.68843202027886	0.448821239011354	2.06851655918271e-16	4.19329676877519e-12
	ENSG00000022277.12_5	RTF2	Gene	Heart failure (pre-LVAD)	iPSC-CVPC	3.37390503767767	0.685758936031093	8.65628664170604e-07	0.0175480242800665
	ENSG00000023228.14_7	NDUFS1	Gene	Heart failure (pre-LVAD)	iPSC-CVPC	1.48135251599781	0.201336326709194	1.87243631317913e-13	3.79580289407673e-09
	ENSG00000024862.17_5	CCDC28A	Gene	Heart failure (pre-LVAD)	iPSC-CVPC	2.85758700226928	0.493227750582847	6.88745410188888e-09	0.000139622469553491
	ENSG00000029725.17_7	RABEP1	Gene	Heart failure (pre-LVAD)	iPSC-CVPC	2.63082527255123	0.529209892942117	6.65287044198367e-07	0.0134866989599893
	ENSG00000030582.18_5	GRN	Gene	Heart failure (pre-LVAD)	iPSC-CVPC	-4.82110564266996	0.792999538504935	1.20496322658312e-09	2.4427014529293e-05
	ENSG00000040487.13_6	SLC66A1	Gene	Heart failure (pre-LVAD)	iPSC-CVPC	-3.96501623451038	0.757330477362972	1.64524096753403e-07	0.00333523248938499
	ENSG00000050130.18_6	JKAMP	Gene	Heart failure (pre-LVAD)	iPSC-CVPC	4.25097543652654	0.858630914547883	7.38800583065811e-07	0.0149769654199101
	ENSG00000050820.17_10	BCAR1	Gene	Heart failure (pre-LVAD)	iPSC-CVPC	-5.15481057566741	0.866169955678576	2.66071038055776e-09	5.39379208346669e-05
	ENSG00000058056.9_5	USP13	Gene	Heart failure (pre-LVAD)	iPSC-CVPC	1.2091379558861	0.256144904776109	2.35238818228127e-06	0.0476876132312059
	ENSG00000059691.12_6	GATB	Gene	Heart failure (pre-LVAD)	iPSC-CVPC	0.7822076124017	0.16383617706762	1.80308500639072e-06	0.0365521392495527
	ENSG00000060069.17_3	CTDP1	Gene	Heart failure (pre-LVAD)	iPSC-CVPC	-4.24102856402852	0.733086647804664	7.24403973502353e-09	0.000146851173508397
	ENSG00000060982.15_7	BCAT1	Gene	Heart failure (pre-LVAD)	iPSC-CVPC	-1.97966114608802	0.405006785051913	1.01880883310738e-06	0.0206532926647528
	ENSG00000063177.13_7	RPL18	Gene	Heart failure (pre-LVAD)	iPSC-CVPC	-5.27903206112249	0.716640226710842	1.75345941589892e-13	3.55461292791029e-09
	ENSG00000063245.15_7	EPN1	Gene	Heart failure (pre-LVAD)	iPSC-CVPC	-4.13224390016417	0.807634063152489	3.11289522562865e-07	0.0063104612013944
	ENSG00000064042.18_5	LIMCH1	Gene	Heart failure (pre-LVAD)	iPSC-CVPC	3.40417086410259	0.511451078869859	2.81558075586324e-11	5.70774530828596e-07
	ENSG00000064205.10_4	CCN5	Gene	Heart failure (pre-LVAD)	iPSC-CVPC	-1.94389350070065	0.356702955485226	5.04791939852391e-08	0.00102331422046877
	ENSG00000064961.19_5	HMG20B	Gene	Heart failure (pre-LVAD)	iPSC-CVPC	-4.0279702726923	0.818918156937846	8.71439516206077e-07	0.0176658218725296
	ENSG00000065268.11_4	WDR18	Gene	Heart failure (pre-LVAD)	iPSC-CVPC	-5.36790273379433	0.794832810522282	1.44321321537309e-11	2.92568183020433e-07
	ENSG00000065491.8_3	TBC1D22B	Gene	Heart failure (pre-LVAD)	iPSC-CVPC	-2.91681204764081	0.558497342827038	1.76421697089606e-07	0.00357642064340049
	ENSG00000066044.15_6	ELAVL1	Gene	Heart failure (pre-LVAD)	iPSC-CVPC	-3.28875487796275	0.561989777119115	4.85744957182771e-09	9.84702177200913e-05
	ENSG00000067225.18_7	PKM	Gene	Heart failure (pre-LVAD)	iPSC-CVPC	-3.54393934913965	0.626283364300836	1.52538550148301e-08	0.000309226148860636
	ENSG00000068120.15_8	COASY	Gene	Heart failure (pre-LVAD)	iPSC-CVPC	-5.56415390767868	1.06859803321401	1.91952975462861e-07	0.00389127071858312
	ENSG00000069188.17_6	SDK2	Gene	Heart failure (pre-LVAD)	iPSC-CVPC	-2.82178500788117	0.483349803705632	5.28384683037487e-09	0.000107114142945359
	ENSG00000070047.13_5	PHRF1	Gene	Heart failure (pre-LVAD)	iPSC-CVPC	-7.07756530621704	1.11330594241139	2.05396241503222e-10	4.16379260775332e-06
	ENSG00000070081.17_8	NUCB2	Gene	Heart failure (pre-LVAD)	iPSC-CVPC	5.28458551723563	0.982131751476452	7.41844996901423e-08	0.00150386817771856
	ENSG00000070814.22_9	TCOF1	Gene	Heart failure (pre-LVAD)	iPSC-CVPC	-4.30303989403252	0.816427709133623	1.3600028875757e-07	0.00275699785369346
	ENSG00000071564.17_9	TCF3	Gene	Heart failure (pre-LVAD)	iPSC-CVPC	-3.17145834162607	0.484002180916989	5.6555059279953e-11	1.14648416172321e-06
	ENSG00000071889.16_6	FAM3A	Gene	Heart failure (pre-LVAD)	iPSC-CVPC	-5.33159136436698	1.10755191337779	1.48048220735259e-06	0.0300123353074517
	ENSG00000072422.17_5	RHOBTB1	Gene	Heart failure (pre-LVAD)	iPSC-CVPC	3.26483776530564	0.682838421098731	1.74187529678901e-06	0.0353112960165068
	ENSG00000072958.8_6	AP1M1	Gene	Heart failure (pre-LVAD)	iPSC-CVPC	-5.79998164841275	0.774151075097428	6.78040197423506e-14	1.37452308821693e-09
	ENSG00000073050.12_6	XRCC1	Gene	Heart failure (pre-LVAD)	iPSC-CVPC	-4.05980569875929	0.853455033985525	1.96582277348655e-06	0.0398511592641193
	ENSG00000073150.14_6	PANX2	Gene	Heart failure (pre-LVAD)	iPSC-CVPC	-3.59266440818334	0.603791990162788	2.67865690618772e-09	5.43017328022375e-05
	ENSG00000073350.14_5	LLGL2	Gene	Heart failure (pre-LVAD)	iPSC-CVPC	-3.29350975603822	0.629203815098485	1.6551409728052e-07	0.0033553017800707
	ENSG00000073670.14_6	ADAM11	Gene	Heart failure (pre-LVAD)	iPSC-CVPC	-3.35492658104625	0.63761052478339	1.42715778789358e-07	0.00289313426761787
	ENSG00000074071.15_5	MRPS34	Gene	Heart failure (pre-LVAD)	iPSC-CVPC	-4.28105800802189	0.762153148502187	1.94236874183134e-08	0.000393756991344049
	ENSG00000074800.16_9	ENO1	Gene	Heart failure (pre-LVAD)	iPSC-CVPC	-4.22191678474027	0.612025547052536	5.26400439214223e-12	1.06711897037507e-07
	ENSG00000075336.12_5	TIMM21	Gene	Heart failure (pre-LVAD)	iPSC-CVPC	1.44014671152545	0.259066276531535	2.71341015923028e-08	0.000550062507479162
	ENSG00000075618.18_4	FSCN1	Gene	Heart failure (pre-LVAD)	iPSC-CVPC	-2.41424258513296	0.361181282409746	2.32037453458012e-11	4.70386325650082e-07
	ENSG00000076043.10_7	REXO2	Gene	Heart failure (pre-LVAD)	iPSC-CVPC	4.14289960726669	0.649445076257659	1.78087791434781e-10	3.61019570796588e-06
	ENSG00000076201.15_5	PTPN23	Gene	Heart failure (pre-LVAD)	iPSC-CVPC	-6.0130472481616	1.00695344421359	2.35046631951686e-09	4.76486532292458e-05
	ENSG00000076242.16_6	MLH1	Gene	Heart failure (pre-LVAD)	iPSC-CVPC	1.976464991958	0.375777878984122	1.44319679728721e-07	0.00292564854746063
	ENSG00000076706.17_7	MCAM	Gene	Heart failure (pre-LVAD)	iPSC-CVPC	2.31699890117075	0.476553565078804	1.1621120761796e-06	0.0235583360083129
	ENSG00000076924.12_5	XAB2	Gene	Heart failure (pre-LVAD)	iPSC-CVPC	-6.37667938526803	1.04680192585413	1.11800549161546e-09	2.26642073260286e-05
	ENSG00000077585.14_8	GPR137B	Gene	Heart failure (pre-LVAD)	iPSC-CVPC	2.90232713908459	0.606787267929143	1.72608009065323e-06	0.0349910955977223
	ENSG00000081154.12_4	PCNP	Gene	Heart failure (pre-LVAD)	iPSC-CVPC	4.41353770399529	0.919604455906822	1.59151972166156e-06	0.0322632877975232
	ENSG00000081913.14_5	PHLPP1	Gene	Heart failure (pre-LVAD)	iPSC-CVPC	-2.53823971342085	0.521519478505042	1.13300181360209e-06	0.0229682127653416
	ENSG00000082212.13_7	ME2	Gene	Heart failure (pre-LVAD)	iPSC-CVPC	2.86463064218426	0.579049862562954	7.53185548149431e-07	0.0152685774320853
	ENSG00000083444.17_5	PLOD1	Gene	Heart failure (pre-LVAD)	iPSC-CVPC	-3.78358132367666	0.673718294817083	1.95463260356156e-08	0.000396243121393999
	ENSG00000083720.13_5	OXCT1	Gene	Heart failure (pre-LVAD)	iPSC-CVPC	2.04847541687798	0.333947197944014	8.5626654307236e-10	1.73582353611629e-05
	ENSG00000083807.10_8	SLC27A5	Gene	Heart failure (pre-LVAD)	iPSC-CVPC	-4.43839636245978	0.928238004936521	1.73967438465836e-06	0.0352666791257943
	ENSG00000083845.9_6	RPS5	Gene	Heart failure (pre-LVAD)	iPSC-CVPC	-4.51885463135666	0.646927051495502	2.84639101683762e-12	5.77020386933322e-08
	ENSG00000084623.11_3	EIF3I	Gene	Heart failure (pre-LVAD)	iPSC-CVPC	-3.27013210412539	0.519109422647478	2.98598780852566e-10	6.05319448544322e-06
	ENSG00000084774.14_6	CAD	Gene	Heart failure (pre-LVAD)	iPSC-CVPC	-4.09571226058188	0.77202653466526	1.12583827270107e-07	0.00228229934641961
	ENSG00000085185.15_7	BCORL1	Gene	Heart failure (pre-LVAD)	iPSC-CVPC	-4.094988937931	0.610501598540385	1.97877094024433e-11	4.01136445006331e-07
	ENSG00000085760.15_5	MTIF2	Gene	Heart failure (pre-LVAD)	iPSC-CVPC	1.63849785583998	0.336855598984644	1.14981300024095e-06	0.0233090091408845
	ENSG00000085872.15_7	CHERP	Gene	Heart failure (pre-LVAD)	iPSC-CVPC	-5.76955411860488	0.898299874513241	1.33835566030378e-10	2.71311459456782e-06
	ENSG00000087088.20_6	BAX	Gene	Heart failure (pre-LVAD)	iPSC-CVPC	-3.78743152198177	0.56435458712406	1.93182722133519e-11	3.9162001430907e-07
	ENSG00000087206.17_7	UIMC1	Gene	Heart failure (pre-LVAD)	iPSC-CVPC	3.67136324301498	0.669250432516576	4.11639886399e-08	0.000834476377708053
	ENSG00000087365.16_7	SF3B2	Gene	Heart failure (pre-LVAD)	iPSC-CVPC	-2.56306995765877	0.468729999377302	4.54844471407863e-08	0.00092206071243802
	ENSG00000088247.17_6	KHSRP	Gene	Heart failure (pre-LVAD)	iPSC-CVPC	-3.12674639445364	0.581715333223577	7.65633380337336e-08	0.00155209198861985
	ENSG00000089053.13_5	ANAPC5	Gene	Heart failure (pre-LVAD)	iPSC-CVPC	4.4465380635251	0.666590626223359	2.54815368148169e-11	5.16561714309968e-07
	ENSG00000089101.19_6	CFAP61	Gene	Heart failure (pre-LVAD)	iPSC-CVPC	2.80042460859205	0.511276692688885	4.31822796442315e-08	0.000875391172947861
	ENSG00000089154.11_5	GCN1	Gene	Heart failure (pre-LVAD)	iPSC-CVPC	-3.80407980100017	0.739848910881082	2.72266248531507e-07	0.00551938139023071
	ENSG00000089248.7_5	ERP29	Gene	Heart failure (pre-LVAD)	iPSC-CVPC	-2.58168345538188	0.346660971867387	9.52798128960046e-14	1.93151236702781e-09
	ENSG00000089356.18_6	FXYD3	Gene	Heart failure (pre-LVAD)	iPSC-CVPC	-3.87046004777883	0.74224908968146	1.84310796891212e-07	0.00373634847457865
	ENSG00000089597.18_6	GANAB	Gene	Heart failure (pre-LVAD)	iPSC-CVPC	-2.21055390050138	0.374798913181481	3.67993991517021e-09	7.45997419603305e-05
	ENSG00000090316.16_5	MAEA	Gene	Heart failure (pre-LVAD)	iPSC-CVPC	-5.78513843939842	0.941194035889888	7.91639782677313e-10	1.60481216744345e-05
	ENSG00000090661.12_5	CERS4	Gene	Heart failure (pre-LVAD)	iPSC-CVPC	-3.89564564705023	0.72910229611374	9.13847315332609e-08	0.00185255127764227
	ENSG00000090861.16_5	AARS1	Gene	Heart failure (pre-LVAD)	iPSC-CVPC	-3.72063956464905	0.627374810580315	3.02033373588446e-09	6.12282054938498e-05
	ENSG00000091140.14_4	DLD	Gene	Heart failure (pre-LVAD)	iPSC-CVPC	1.31967708655441	0.259197787754389	3.55447613684855e-07	0.00720563402461938
	ENSG00000091947.10_6	TMEM101	Gene	Heart failure (pre-LVAD)	iPSC-CVPC	-4.91439768661764	0.978533850911171	5.10815947885928e-07	0.0103552608955435
	ENSG00000092531.10_5	SNAP23	Gene	Heart failure (pre-LVAD)	iPSC-CVPC	3.68522951492916	0.750636887691895	9.13227233390966e-07	0.0185129424753017
	ENSG00000092621.12_5	PHGDH	Gene	Heart failure (pre-LVAD)	iPSC-CVPC	-2.5115424394877	0.458554786082491	4.32395411164014e-08	0.000876551977511689
	ENSG00000093167.18_8	LRRFIP2	Gene	Heart failure (pre-LVAD)	iPSC-CVPC	2.81919845309397	0.555838652713467	3.93712950952472e-07	0.00798134894170851
	ENSG00000095209.12_8	TMEM38B	Gene	Heart failure (pre-LVAD)	iPSC-CVPC	1.50818432232026	0.307350740088759	9.24581969392029e-07	0.0187431256835152
	ENSG00000095397.16_8	WHRN	Gene	Heart failure (pre-LVAD)	iPSC-CVPC	-2.61629252070052	0.501456340617147	1.81463438159988e-07	0.00367862681837928
	ENSG00000095637.22_9	SORBS1	Gene	Heart failure (pre-LVAD)	iPSC-CVPC	3.4508068436777	0.493373023092479	2.66556099868752e-12	5.40362525653934e-08
	ENSG00000095906.17_6	NUBP2	Gene	Heart failure (pre-LVAD)	iPSC-CVPC	-6.72545988541627	1.20670658011575	2.49813374435854e-08	0.000506421672656363
	ENSG00000099246.17_3	RAB18	Gene	Heart failure (pre-LVAD)	iPSC-CVPC	5.18785713481193	0.765693088988149	1.24084745617745e-11	2.51544596316293e-07
	ENSG00000099308.10_5	MAST3	Gene	Heart failure (pre-LVAD)	iPSC-CVPC	-2.3638506428056	0.424555656730822	2.5794201360661e-08	0.00052290004998332
	ENSG00000099797.15_6	TECR	Gene	Heart failure (pre-LVAD)	iPSC-CVPC	-4.57402099100038	0.849381981286103	7.23977079872702e-08	0.00146764633631794
	ENSG00000099817.12_5	POLR2E	Gene	Heart failure (pre-LVAD)	iPSC-CVPC	-5.6163545085053	1.14200199341814	8.74373292300093e-07	0.0177252953815075
	ENSG00000099917.17_6	MED15	Gene	Heart failure (pre-LVAD)	iPSC-CVPC	-3.67970625060064	0.647891431271922	1.35080680384757e-08	0.000273835555275979
	ENSG00000099942.13_4	CRKL	Gene	Heart failure (pre-LVAD)	iPSC-CVPC	-3.73775190651291	0.710553950969502	1.43793087787069e-07	0.00291497347561946
	ENSG00000099977.14_5	DDT	Gene	Heart failure (pre-LVAD)	iPSC-CVPC	-6.3250890148862	1.01079626076102	3.91119733340108e-10	7.92877923427067e-06
	ENSG00000099991.18_8	CABIN1	Gene	Heart failure (pre-LVAD)	iPSC-CVPC	-4.38488583598824	0.821771716306139	9.50755310549033e-08	0.001927371165545
	ENSG00000100225.18_6	FBXO7	Gene	Heart failure (pre-LVAD)	iPSC-CVPC	-3.3401295870195	0.601558312425924	2.81674184508323e-08	0.000571009906835273
	ENSG00000100226.16_6	GTPBP1	Gene	Heart failure (pre-LVAD)	iPSC-CVPC	-4.62282802606609	0.733117674261842	2.86874284588987e-10	5.81551549718795e-06
	ENSG00000100280.16_5	AP1B1	Gene	Heart failure (pre-LVAD)	iPSC-CVPC	-4.68625022375395	0.716252585074488	6.04041682229046e-11	1.22451329821472e-06
	ENSG00000100294.13_7	MCAT	Gene	Heart failure (pre-LVAD)	iPSC-CVPC	-4.00265903115872	0.820311691700346	1.06389223926557e-06	0.0215672234743916
	ENSG00000100324.14_4	TAB1	Gene	Heart failure (pre-LVAD)	iPSC-CVPC	-4.01886662787074	0.805080698022034	5.97942514222413e-07	0.0121214906483168
	ENSG00000100350.14_5	FOXRED2	Gene	Heart failure (pre-LVAD)	iPSC-CVPC	-3.21652327446191	0.542085113477013	2.96339881669501e-09	6.00740208120412e-05
	ENSG00000100353.18_5	EIF3D	Gene	Heart failure (pre-LVAD)	iPSC-CVPC	-3.26369765586145	0.618317995386315	1.30353613087921e-07	0.00264252844451833
	ENSG00000100365.16_6	NCF4	Gene	Heart failure (pre-LVAD)	iPSC-CVPC	-1.93850939220326	0.370425922051593	1.66608929663466e-07	0.00337749622213778
	ENSG00000100426.7_5	ZBED4	Gene	Heart failure (pre-LVAD)	iPSC-CVPC	-1.78701889869227	0.356418276950207	5.33584958053706e-07	0.0108168342696647
	ENSG00000100568.11_8	VTI1B	Gene	Heart failure (pre-LVAD)	iPSC-CVPC	4.68932530728638	0.782695021623835	2.08228092679662e-09	4.22119989480211e-05
	ENSG00000100764.14_6	PSMC1	Gene	Heart failure (pre-LVAD)	iPSC-CVPC	3.26330464088546	0.597655135979002	4.75651996658587e-08	0.000964241727626287
	ENSG00000100908.14_5	EMC9	Gene	Heart failure (pre-LVAD)	iPSC-CVPC	-5.34306039815228	1.12603563017725	2.08486821618857e-06	0.0422644484785747
	ENSG00000100926.15_9	TM9SF1	Gene	Heart failure (pre-LVAD)	iPSC-CVPC	-3.76960624922813	0.547923413000039	5.99345352669651e-12	1.21499289893192e-07
	ENSG00000100994.12_5	PYGB	Gene	Heart failure (pre-LVAD)	iPSC-CVPC	-3.33616890518998	0.658886073267717	4.11958750355888e-07	0.00835122778721456
	ENSG00000101144.13_5	BMP7	Gene	Heart failure (pre-LVAD)	iPSC-CVPC	-2.68882398863076	0.528385219585992	3.60418079767151e-07	0.00730639531303969
	ENSG00000101161.8_4	PRPF6	Gene	Heart failure (pre-LVAD)	iPSC-CVPC	-4.16928044038121	0.701460112796804	2.78630370967599e-09	5.64839488025517e-05
	ENSG00000101290.14_7	CDS2	Gene	Heart failure (pre-LVAD)	iPSC-CVPC	3.13657867342864	0.624856997428192	5.17591357144949e-07	0.0104926119920424
	ENSG00000101400.6_4	SNTA1	Gene	Heart failure (pre-LVAD)	iPSC-CVPC	-3.0629883173996	0.584157922923631	1.57622808781223e-07	0.00319532957961295
	ENSG00000101608.12_7	MYL12A	Gene	Heart failure (pre-LVAD)	iPSC-CVPC	3.89661121767969	0.796501423756954	9.97360679109946e-07	0.0202184956869168
	ENSG00000101986.12_4	ABCD1	Gene	Heart failure (pre-LVAD)	iPSC-CVPC	-4.76478680794896	0.867639488357219	3.98158463685607e-08	0.000807146837583463
	ENSG00000102858.13_9	MGRN1	Gene	Heart failure (pre-LVAD)	iPSC-CVPC	-4.71506725446482	0.725754248920898	8.20561448970793e-11	1.66344216935359e-06
	ENSG00000102934.10_5	PLLP	Gene	Heart failure (pre-LVAD)	iPSC-CVPC	3.0715548932105	0.628650279333357	1.02930438012108e-06	0.0208660583938145
	ENSG00000103035.11_4	PSMD7	Gene	Heart failure (pre-LVAD)	iPSC-CVPC	2.43574153119094	0.434813153591548	2.12122583328942e-08	0.000430014900924431
	ENSG00000103043.15_6	VAC14	Gene	Heart failure (pre-LVAD)	iPSC-CVPC	-3.94708143658504	0.78408462289324	4.80351444192263e-07	0.00973768447666555
	ENSG00000103316.11_5	CRYM	Gene	Heart failure (pre-LVAD)	iPSC-CVPC	2.13561331837248	0.440096526972826	1.21852032630688e-06	0.0247018440548931
	ENSG00000103495.14_6	MAZ	Gene	Heart failure (pre-LVAD)	iPSC-CVPC	-3.14810191136583	0.621760905238862	4.12269643375061e-07	0.00835753021049924
	ENSG00000103507.14_7	BCKDK	Gene	Heart failure (pre-LVAD)	iPSC-CVPC	-4.07734650310644	0.847402332078301	1.49739659577593e-06	0.0303552237895697
	ENSG00000103653.16_4	CSK	Gene	Heart failure (pre-LVAD)	iPSC-CVPC	-4.97952816020805	0.714556243907895	3.19882792882624e-12	6.48466397731655e-08
	ENSG00000103855.18_4	CD276	Gene	Heart failure (pre-LVAD)	iPSC-CVPC	-2.74435298653992	0.556854519835199	8.29429588069794e-07	0.0168141966093509
	ENSG00000103994.17_9	ZNF106	Gene	Heart failure (pre-LVAD)	iPSC-CVPC	2.21742477874757	0.439154720756753	4.43427428240269e-07	0.00898916082528674
	ENSG00000104081.14_6	BMF	Gene	Heart failure (pre-LVAD)	iPSC-CVPC	-2.79847910097053	0.48837343126019	1.00310273768908e-08	0.00020334898698433
	ENSG00000104142.11_4	VPS18	Gene	Heart failure (pre-LVAD)	iPSC-CVPC	-3.27556163494452	0.65605974002205	5.95164863453884e-07	0.0120651821119371
	ENSG00000104388.15_7	RAB2A	Gene	Heart failure (pre-LVAD)	iPSC-CVPC	2.82697534811173	0.550692096835465	2.84409979087141e-07	0.00576555909605452
	ENSG00000104833.12_8	TUBB4A	Gene	Heart failure (pre-LVAD)	iPSC-CVPC	-3.19286914647683	0.676164179236047	2.33499499173391e-06	0.0473350184724298
	ENSG00000104872.11_6	PIH1D1	Gene	Heart failure (pre-LVAD)	iPSC-CVPC	-4.63529213998164	0.916558705236459	4.2528314340271e-07	0.00862133988305974
	ENSG00000104885.18_4	DOT1L	Gene	Heart failure (pre-LVAD)	iPSC-CVPC	-4.0336116702237	0.522507912358621	1.16590974372846e-14	2.36353223248633e-10
	ENSG00000104886.12_5	PLEKHJ1	Gene	Heart failure (pre-LVAD)	iPSC-CVPC	-3.84353119793836	0.658610191226908	5.35263305421546e-09	0.000108508577275056
	ENSG00000104897.10_9	SF3A2	Gene	Heart failure (pre-LVAD)	iPSC-CVPC	-7.29300082235823	0.83259359748793	1.96333252608343e-18	3.98006769687633e-14
	ENSG00000104901.7_6	DKKL1	Gene	Heart failure (pre-LVAD)	iPSC-CVPC	-3.05054484997609	0.568543858617953	8.07073636916176e-08	0.00163609967675647
	ENSG00000104972.15_4	LILRB1	Gene	Heart failure (pre-LVAD)	iPSC-CVPC	-1.9834860411818	0.397179807708257	5.91644816127877e-07	0.0119938237125443
	ENSG00000105137.13_5	SYDE1	Gene	Heart failure (pre-LVAD)	iPSC-CVPC	-3.12097831713324	0.631853593796383	7.83628878662171e-07	0.0158857246282395
	ENSG00000105220.17_8	GPI	Gene	Heart failure (pre-LVAD)	iPSC-CVPC	-3.34345946984498	0.686972071751116	1.13333065244248e-06	0.022974878986314
	ENSG00000105223.20_5	PLD3	Gene	Heart failure (pre-LVAD)	iPSC-CVPC	-2.57841267395847	0.485892241774316	1.11718015279944e-07	0.00226474760575502
	ENSG00000105229.7_4	PIAS4	Gene	Heart failure (pre-LVAD)	iPSC-CVPC	-3.36106928586045	0.683725575416593	8.84133025358573e-07	0.017923144690069
	ENSG00000105298.14_6	CACTIN	Gene	Heart failure (pre-LVAD)	iPSC-CVPC	-3.55084793958523	0.744106581778695	1.82440408661361e-06	0.0369843196438311
	ENSG00000105323.17_6	HNRNPUL1	Gene	Heart failure (pre-LVAD)	iPSC-CVPC	-3.34848749956743	0.617419925143853	5.84906324369095e-08	0.00118572210076103
	ENSG00000105355.9_7	PLIN3	Gene	Heart failure (pre-LVAD)	iPSC-CVPC	-3.02285241923286	0.619814527495112	1.07696493041505e-06	0.0218322330693739
	ENSG00000105374.10_7	NKG7	Gene	Heart failure (pre-LVAD)	iPSC-CVPC	-3.1035799509681	0.523651271575395	3.0888189884678e-09	6.26165385342193e-05
	ENSG00000105393.16_7	BABAM1	Gene	Heart failure (pre-LVAD)	iPSC-CVPC	-4.84258210355047	0.88808073044451	4.95653972957704e-08	0.00100478973397986
	ENSG00000105426.17_6	PTPRS	Gene	Heart failure (pre-LVAD)	iPSC-CVPC	-3.30094267714211	0.698323077938436	2.27910282568682e-06	0.0462019724823232
	ENSG00000105429.13_5	MEGF8	Gene	Heart failure (pre-LVAD)	iPSC-CVPC	-2.70463388161407	0.461967703336288	4.78173350475507e-09	9.69353016083948e-05
	ENSG00000105438.9_6	KDELR1	Gene	Heart failure (pre-LVAD)	iPSC-CVPC	-3.40842753533202	0.398712911964326	1.24616651830002e-17	2.5262287658978e-13
	ENSG00000105619.13_6	TFPT	Gene	Heart failure (pre-LVAD)	iPSC-CVPC	-4.8709075569592	0.991035124740534	8.87962158865363e-07	0.0180007688845186
	ENSG00000105647.18_6	PIK3R2	Gene	Heart failure (pre-LVAD)	iPSC-CVPC	-3.15693856433695	0.608120491407052	2.08825926478094e-07	0.00423331918156392
	ENSG00000105655.19_8	ISYNA1	Gene	Heart failure (pre-LVAD)	iPSC-CVPC	-3.34033600202245	0.665610330971106	5.20884839541773e-07	0.0105593774671908
	ENSG00000105699.16_6	LSR	Gene	Heart failure (pre-LVAD)	iPSC-CVPC	-3.1285527841688	0.537934560341262	6.03224744034325e-09	0.000122285720110638
	ENSG00000105701.16_9	FKBP8	Gene	Heart failure (pre-LVAD)	iPSC-CVPC	-4.69223730252909	0.87627048939125	8.5659705520937e-08	0.00173649355032044
	ENSG00000105722.10_6	ERF	Gene	Heart failure (pre-LVAD)	iPSC-CVPC	-3.69675660173581	0.765133285412076	1.35494755064456e-06	0.0274674967466665
	ENSG00000105732.13_6	ZNF574	Gene	Heart failure (pre-LVAD)	iPSC-CVPC	-3.94910387226561	0.72500098625835	5.12171324937477e-08	0.00103827370991325
	ENSG00000105821.15_5	DNAJC2	Gene	Heart failure (pre-LVAD)	iPSC-CVPC	4.56603820888709	0.938005847547142	1.12839326611646e-06	0.0228747882907129
	ENSG00000105993.15_7	DNAJB6	Gene	Heart failure (pre-LVAD)	iPSC-CVPC	5.33869058160417	0.639155686886573	6.67068076263156e-17	1.35228040420067e-12
	ENSG00000106078.19_7	COBL	Gene	Heart failure (pre-LVAD)	iPSC-CVPC	1.69226012798967	0.318388550445195	1.06611377005073e-07	0.00216122583464684
	ENSG00000106263.18_4	EIF3B	Gene	Heart failure (pre-LVAD)	iPSC-CVPC	-3.24674094301372	0.635627235332399	3.2570314340577e-07	0.00660265412312177
	ENSG00000106290.15_8	TAF6	Gene	Heart failure (pre-LVAD)	iPSC-CVPC	-4.76127722161297	0.779271998846689	9.96909930817139e-10	2.0209358117525e-05
	ENSG00000106554.13_7	CHCHD3	Gene	Heart failure (pre-LVAD)	iPSC-CVPC	1.15788729506631	0.213253598628554	5.64722543018369e-08	0.00114480553920684
	ENSG00000106638.17_7	TBL2	Gene	Heart failure (pre-LVAD)	iPSC-CVPC	-2.42122893382412	0.389382131765775	5.03112860718322e-10	1.01991039124818e-05
	ENSG00000107223.13_6	EDF1	Gene	Heart failure (pre-LVAD)	iPSC-CVPC	-4.11175997316474	0.775696305389579	1.15337873536188e-07	0.0023381293723256
	ENSG00000107554.17_7	DNMBP	Gene	Heart failure (pre-LVAD)	iPSC-CVPC	-2.82950065008673	0.59641655549806	2.09364500739674e-06	0.0424423715899467
	ENSG00000107816.17_4	LZTS2	Gene	Heart failure (pre-LVAD)	iPSC-CVPC	-4.41411441259819	0.674814923547009	6.10180602720309e-11	1.23695811783461e-06
	ENSG00000107882.12_3	SUFU	Gene	Heart failure (pre-LVAD)	iPSC-CVPC	-2.59884593840545	0.435230933008515	2.35531428450128e-09	4.774693117541e-05
	ENSG00000107897.19_6	ACBD5	Gene	Heart failure (pre-LVAD)	iPSC-CVPC	1.51787441144889	0.273520189398701	2.86642829406157e-08	0.000581082343772162
	ENSG00000108107.15_5	RPL28	Gene	Heart failure (pre-LVAD)	iPSC-CVPC	-4.02896649383069	0.705634868426168	1.13172582218127e-08	0.000229423458672587
	ENSG00000108479.12_7	GALK1	Gene	Heart failure (pre-LVAD)	iPSC-CVPC	-6.44094478742492	1.19356977586981	6.8002433340134e-08	0.0013785453286712
	ENSG00000108588.14_8	CCDC47	Gene	Heart failure (pre-LVAD)	iPSC-CVPC	2.3149572780355	0.431603162582605	8.15684037586734e-08	0.00165355468099583
	ENSG00000108591.10_6	DRG2	Gene	Heart failure (pre-LVAD)	iPSC-CVPC	-5.20040051597759	1.02123104453008	3.53771977976147e-07	0.00717166553753245
	ENSG00000108799.13_5	EZH1	Gene	Heart failure (pre-LVAD)	iPSC-CVPC	1.97883962144288	0.397625103875571	6.4695282055104e-07	0.0131150275782107
	ENSG00000108828.16_6	VAT1	Gene	Heart failure (pre-LVAD)	iPSC-CVPC	-3.89505168176248	0.781744580792635	6.27641272939129e-07	0.012723543885022
	ENSG00000109103.12_7	UNC119	Gene	Heart failure (pre-LVAD)	iPSC-CVPC	-5.97148546839528	1.01171494899895	3.58381932850785e-09	7.26511854275111e-05
	ENSG00000109445.11_6	ZNF330	Gene	Heart failure (pre-LVAD)	iPSC-CVPC	2.08472743230662	0.423670237249597	8.62630058499316e-07	0.0174872365458981
	ENSG00000109670.16_8	FBXW7	Gene	Heart failure (pre-LVAD)	iPSC-CVPC	4.22220252067965	0.548756662104137	1.42465385228739e-14	2.888058289357e-10
	ENSG00000109686.18_9	SH3D19	Gene	Heart failure (pre-LVAD)	iPSC-CVPC	2.4402705701478	0.471251454902272	2.23944552547064e-07	0.00453980396923408
	ENSG00000109861.16_5	CTSC	Gene	Heart failure (pre-LVAD)	iPSC-CVPC	-2.19523751035681	0.413680965476939	1.11691713977497e-07	0.00226421442575182
	ENSG00000110107.9_6	PRPF19	Gene	Heart failure (pre-LVAD)	iPSC-CVPC	-3.34044640255493	0.706698420052444	2.28047095554749e-06	0.0462297072108587
	ENSG00000110651.12_6	CD81	Gene	Heart failure (pre-LVAD)	iPSC-CVPC	-2.78342033298022	0.551672940930607	4.525320301251e-07	0.00917372931469603
	ENSG00000111057.11_7	KRT18	Gene	Heart failure (pre-LVAD)	iPSC-CVPC	-2.50384035235627	0.345622517804951	4.34241084598246e-13	8.80293526697564e-09
	ENSG00000111145.8_6	ELK3	Gene	Heart failure (pre-LVAD)	iPSC-CVPC	3.67788867730279	0.67763348062749	5.71332993718752e-08	0.00115820624486665
	ENSG00000111186.13_4	WNT5B	Gene	Heart failure (pre-LVAD)	iPSC-CVPC	-2.70192380792491	0.526753971791943	2.90690620655215e-07	0.00589288026192252
	ENSG00000111252.11_4	SH2B3	Gene	Heart failure (pre-LVAD)	iPSC-CVPC	3.11073843609277	0.466688450356155	2.63663571437093e-11	5.34498792017275e-07
	ENSG00000111348.9_6	ARHGDIB	Gene	Heart failure (pre-LVAD)	iPSC-CVPC	1.91863186573247	0.4063188768412	2.33553277850039e-06	0.0473459204857599
	ENSG00000111640.15_5	GAPDH	Gene	Heart failure (pre-LVAD)	iPSC-CVPC	-3.34246101285369	0.590211332146391	1.48610755931457e-08	0.00030126372442425
	ENSG00000111669.15_6	TPI1	Gene	Heart failure (pre-LVAD)	iPSC-CVPC	-2.81947681168889	0.584742009912849	1.42307855793249e-06	0.0288486485264074
	ENSG00000111670.16_7	GNPTAB	Gene	Heart failure (pre-LVAD)	iPSC-CVPC	3.87406108050847	0.61532007166366	3.05405459082181e-10	6.19117946651397e-06
	ENSG00000111716.14_7	LDHB	Gene	Heart failure (pre-LVAD)	iPSC-CVPC	1.13668076990479	0.24007906521559	2.19476592268813e-06	0.0444922947847338
	ENSG00000111796.4_5	KLRB1	Gene	Heart failure (pre-LVAD)	iPSC-CVPC	-1.81846884071842	0.383308116273438	2.09390023770096e-06	0.0424475456186739
	ENSG00000111832.13_8	RWDD1	Gene	Heart failure (pre-LVAD)	iPSC-CVPC	5.23508472559677	0.849256977106605	7.07903759788667e-10	1.43506250184359e-05
	ENSG00000112039.5_5	FANCE	Gene	Heart failure (pre-LVAD)	iPSC-CVPC	-2.11053470970369	0.446460399840631	2.27568992367935e-06	0.0461327861328278
	ENSG00000112308.13_5	C6orf62	Gene	Heart failure (pre-LVAD)	iPSC-CVPC	5.09137144680183	0.836897811828204	1.1749611411597e-09	2.38188122535894e-05
	ENSG00000112651.12_5	MRPL2	Gene	Heart failure (pre-LVAD)	iPSC-CVPC	-4.18032229257803	0.71521538368559	5.07043425758596e-09	0.000102787843269783
	ENSG00000112655.16_8	PTK7	Gene	Heart failure (pre-LVAD)	iPSC-CVPC	-1.54498277800069	0.285006652538141	5.93111173611053e-08	0.00120235497114433
	ENSG00000112667.13_5	DNPH1	Gene	Heart failure (pre-LVAD)	iPSC-CVPC	-6.58571132186974	1.16761106048032	1.69724878457129e-08	0.000344066273608292
	ENSG00000112782.19_7	CLIC5	Gene	Heart failure (pre-LVAD)	iPSC-CVPC	2.05726948697609	0.205067450484852	1.10081585815098e-23	2.23157390764367e-19
	ENSG00000113312.11_5	TTC1	Gene	Heart failure (pre-LVAD)	iPSC-CVPC	2.41813250953524	0.423978578512074	1.17419677111325e-08	0.000238033169440078
	ENSG00000113430.10_6	IRX4	Gene	Heart failure (pre-LVAD)	iPSC-CVPC	-3.21910030281887	0.57180351957701	1.80490339812368e-08	0.000365890016867632
	ENSG00000113845.10_4	TIMMDC1	Gene	Heart failure (pre-LVAD)	iPSC-CVPC	1.92543577717773	0.361794872858549	1.0268957660279e-07	0.00208172309689176
	ENSG00000114166.8_4	KAT2B	Gene	Heart failure (pre-LVAD)	iPSC-CVPC	3.27517644847162	0.580685383832136	1.69861683996976e-08	0.00034434360579867
	ENSG00000114544.16_6	SLC41A3	Gene	Heart failure (pre-LVAD)	iPSC-CVPC	-4.89389084195416	0.780514540814848	3.60856031557224e-10	7.31527347172805e-06
	ENSG00000114650.20_8	SCAP	Gene	Heart failure (pre-LVAD)	iPSC-CVPC	-7.6257285250041	1.08001891745255	1.65622913505377e-12	3.357507702581e-08
	ENSG00000115194.11_8	SLC30A3	Gene	Heart failure (pre-LVAD)	iPSC-CVPC	-3.16754381015525	0.503073543831651	3.04670651791972e-10	6.17628345312686e-06
	ENSG00000115241.11_6	PPM1G	Gene	Heart failure (pre-LVAD)	iPSC-CVPC	-3.42045011740425	0.589554266540248	6.56239338137222e-09	0.000133032838627178
	ENSG00000115268.9_5	RPS15	Gene	Heart failure (pre-LVAD)	iPSC-CVPC	-5.12927690269757	0.842574337581699	1.14597642538121e-09	2.32312340953279e-05
	ENSG00000115275.14_8	MOGS	Gene	Heart failure (pre-LVAD)	iPSC-CVPC	-4.21508463854324	0.771061907061998	4.58757662080252e-08	0.000929993532569087
	ENSG00000115386.6_4	REG1A	Gene	Heart failure (pre-LVAD)	iPSC-CVPC	-1.2252745327564	0.250828847279478	1.03479901549252e-06	0.0209774456420644
	ENSG00000115459.18_4	ELMOD3	Gene	Heart failure (pre-LVAD)	iPSC-CVPC	3.61957217782827	0.69266999634173	1.73651090755122e-07	0.00352025491178783
	ENSG00000115561.16_6	CHMP3	Gene	Heart failure (pre-LVAD)	iPSC-CVPC	3.45041821859059	0.641459998685399	7.48975405562306e-08	0.00151832294215591
	ENSG00000115694.15_6	STK25	Gene	Heart failure (pre-LVAD)	iPSC-CVPC	-5.56779048783786	1.17836501742542	2.30100192110797e-06	0.0466459109447008
	ENSG00000115902.11_4	SLC1A4	Gene	Heart failure (pre-LVAD)	iPSC-CVPC	-3.92672248105366	0.765240689338225	2.8766209678646e-07	0.00583148602605512
	ENSG00000116095.11_4	PLEKHA3	Gene	Heart failure (pre-LVAD)	iPSC-CVPC	3.02845289601788	0.60250643442188	4.9970998404434e-07	0.0101301207965469
	ENSG00000116212.15_5	LRRC42	Gene	Heart failure (pre-LVAD)	iPSC-CVPC	-2.19635499315695	0.437886952977704	5.2812232701504e-07	0.0107060958132489
	ENSG00000116273.6_4	PHF13	Gene	Heart failure (pre-LVAD)	iPSC-CVPC	-3.55316071893648	0.613861840763177	7.11408015802429e-09	0.000144216632963468
	ENSG00000116459.11_5	ATP5PB	Gene	Heart failure (pre-LVAD)	iPSC-CVPC	1.70838710212433	0.345451677873737	7.59985411012413e-07	0.0154064242520436
	ENSG00000116688.17_8	MFN2	Gene	Heart failure (pre-LVAD)	iPSC-CVPC	1.37237054504942	0.232875518368444	3.78900348497444e-09	7.68106786474018e-05
	ENSG00000116754.13_3	SRSF11	Gene	Heart failure (pre-LVAD)	iPSC-CVPC	4.56690797599708	0.782710903590871	5.38772513147232e-09	0.000109219963865207
	ENSG00000116815.16_7	CD58	Gene	Heart failure (pre-LVAD)	iPSC-CVPC	3.58966898955805	0.62374885966091	8.66464799514383e-09	0.000175649744157556
	ENSG00000116863.11_4	ADPRS	Gene	Heart failure (pre-LVAD)	iPSC-CVPC	-3.97710649336714	0.760256804645554	1.68351946704574e-07	0.00341283066359512
	ENSG00000117054.14_7	ACADM	Gene	Heart failure (pre-LVAD)	iPSC-CVPC	1.67232574612349	0.247702260239787	1.46471322281904e-11	2.96926664529876e-07
	ENSG00000117614.10_6	SYF2	Gene	Heart failure (pre-LVAD)	iPSC-CVPC	3.88345177892099	0.739677272874633	1.51936209014654e-07	0.00308005082914507
	ENSG00000117676.14_7	RPS6KA1	Gene	Heart failure (pre-LVAD)	iPSC-CVPC	-2.35869625802885	0.492484434007425	1.67295444433245e-06	0.0339141324955074
	ENSG00000118308.15_10	LRMP	Gene	Heart failure (pre-LVAD)	iPSC-CVPC	4.34599406599614	0.916168577311883	2.09888945753604e-06	0.0425486870831706
	ENSG00000118518.15_7	RNF146	Gene	Heart failure (pre-LVAD)	iPSC-CVPC	3.56788326501983	0.70566942601458	4.28082044803708e-07	0.00867807921226077
	ENSG00000118579.13_5	MED28	Gene	Heart failure (pre-LVAD)	iPSC-CVPC	-3.6278342523831	0.582576897989315	4.74785555925451e-10	9.62485278972074e-06
	ENSG00000118729.11_3	CASQ2	Gene	Heart failure (pre-LVAD)	iPSC-CVPC	3.84562195705656	0.67570408494831	1.26089653468959e-08	0.000255608945512274
	ENSG00000119013.9_4	NDUFB3	Gene	Heart failure (pre-LVAD)	iPSC-CVPC	1.80286086088077	0.27006734508379	2.46227102779602e-11	4.99151582754809e-07
	ENSG00000119048.8_5	UBE2B	Gene	Heart failure (pre-LVAD)	iPSC-CVPC	3.06291141153383	0.530588900499277	7.80279668726277e-09	0.000158178294444191
	ENSG00000119574.13_6	ZBTB45	Gene	Heart failure (pre-LVAD)	iPSC-CVPC	-5.96675163473734	0.949201312960223	3.25590504928892e-10	6.6003707159185e-06
	ENSG00000119669.5_4	IRF2BPL	Gene	Heart failure (pre-LVAD)	iPSC-CVPC	-4.07091780774007	0.858290255437377	2.10519180263118e-06	0.0426764482229393
	ENSG00000119707.14_5	RBM25	Gene	Heart failure (pre-LVAD)	iPSC-CVPC	5.38605840835885	0.892580317879377	1.5969642889366e-09	3.23736600653228e-05
	ENSG00000120688.9_4	WBP4	Gene	Heart failure (pre-LVAD)	iPSC-CVPC	3.3931898525953	0.634901299699034	9.06986281147719e-08	0.00183864258914266
	ENSG00000121753.12_7	ADGRB2	Gene	Heart failure (pre-LVAD)	iPSC-CVPC	-2.14802220571582	0.45048946741012	1.85882632992913e-06	0.0376821273603233
	ENSG00000121766.15_5	ZCCHC17	Gene	Heart failure (pre-LVAD)	iPSC-CVPC	2.56471912937931	0.425651360470267	1.68693309686853e-09	3.41975077397188e-05
	ENSG00000121851.13_6	POLR3GL	Gene	Heart failure (pre-LVAD)	iPSC-CVPC	3.27949451869969	0.605653343677185	6.1355667698141e-08	0.00124380209557671
	ENSG00000122026.10_3	RPL21	Gene	Heart failure (pre-LVAD)	iPSC-CVPC	3.66942319191936	0.752813569690493	1.09206694771817e-06	0.0221383811641427
	ENSG00000122068.13_4	FYTTD1	Gene	Heart failure (pre-LVAD)	iPSC-CVPC	2.64634588378542	0.491375551555512	7.22085138702105e-08	0.00146381099317691
	ENSG00000122304.11_4	PRM2	Gene	Heart failure (pre-LVAD)	iPSC-CVPC	-1.22002015246854	0.11823990552175	5.83205508519486e-25	1.1822742068707e-20
	ENSG00000122376.11_6	SHLD2	Gene	Heart failure (pre-LVAD)	iPSC-CVPC	3.86841574393982	0.692528648105365	2.32454419069709e-08	0.000471231598338114
	ENSG00000122386.10_3	ZNF205	Gene	Heart failure (pre-LVAD)	iPSC-CVPC	-5.14237609706276	1.03212814812492	6.28316533105041e-07	0.0127372327591054
	ENSG00000122550.18_5	KLHL7	Gene	Heart failure (pre-LVAD)	iPSC-CVPC	1.96750575211579	0.360786548802686	4.94216072607078e-08	0.00100187482238907
	ENSG00000122786.20_8	CALD1	Gene	Heart failure (pre-LVAD)	iPSC-CVPC	3.69716712476096	0.598607395180484	6.56293845308826e-10	1.33043888321005e-05
	ENSG00000123159.16_6	GIPC1	Gene	Heart failure (pre-LVAD)	iPSC-CVPC	-6.26886709144109	0.840117683584005	8.52890387266726e-14	1.72897939306711e-09
	ENSG00000123240.17_7	OPTN	Gene	Heart failure (pre-LVAD)	iPSC-CVPC	3.25106046683083	0.543319788436655	2.18130212110904e-09	4.42193565991225e-05
	ENSG00000123472.12_7	ATPAF1	Gene	Heart failure (pre-LVAD)	iPSC-CVPC	2.55832900163838	0.396939773657103	1.1550030025368e-10	2.3414220867426e-06
	ENSG00000123836.15_7	PFKFB2	Gene	Heart failure (pre-LVAD)	iPSC-CVPC	1.4973642932566	0.288871448298446	2.17763702123069e-07	0.00441450576943886
	ENSG00000124370.11_6	MCEE	Gene	Heart failure (pre-LVAD)	iPSC-CVPC	3.43533990971975	0.666365393255966	2.53171656941133e-07	0.00513229582951065
	ENSG00000124380.11_5	SNRNP27	Gene	Heart failure (pre-LVAD)	iPSC-CVPC	4.5072549653079	0.893744691058948	4.58019934810298e-07	0.00928498011847436
	ENSG00000124702.18_4	KLHDC3	Gene	Heart failure (pre-LVAD)	iPSC-CVPC	-3.45135811960738	0.482557065585509	8.53806449970562e-13	1.73083643538032e-08
	ENSG00000124766.7_5	SOX4	Gene	Heart failure (pre-LVAD)	iPSC-CVPC	-1.64750673022867	0.329199795231588	5.59839418633743e-07	0.0113490646945432
	ENSG00000124782.20_9	RREB1	Gene	Heart failure (pre-LVAD)	iPSC-CVPC	-3.14333730225267	0.552396059008308	1.26765277187722e-08	0.00025697856991495
	ENSG00000125356.7_4	NDUFA1	Gene	Heart failure (pre-LVAD)	iPSC-CVPC	0.998782760052614	0.201117857825779	6.8292844877547e-07	0.0138443255135763
	ENSG00000125482.13_5	TTF1	Gene	Heart failure (pre-LVAD)	iPSC-CVPC	3.57543797725491	0.746685108451185	1.6810395760694e-06	0.0340780342860789
	ENSG00000125505.17_7	MBOAT7	Gene	Heart failure (pre-LVAD)	iPSC-CVPC	-4.18687747765038	0.546912558032585	1.92593363700612e-14	3.90425266893881e-10
	ENSG00000125755.19_6	SYMPK	Gene	Heart failure (pre-LVAD)	iPSC-CVPC	-4.93699835968689	0.954370903072046	2.30316325594126e-07	0.00466897255244412
	ENSG00000125835.19_6	SNRPB	Gene	Heart failure (pre-LVAD)	iPSC-CVPC	-3.1592007856045	0.606991486751427	1.94323709093776e-07	0.00393933023074903
	ENSG00000125841.13_5	NRSN2	Gene	Heart failure (pre-LVAD)	iPSC-CVPC	-2.89539432658621	0.596906601760235	1.23047842310648e-06	0.0249442585932146
	ENSG00000125898.13_7	FAM110A	Gene	Heart failure (pre-LVAD)	iPSC-CVPC	-4.9796322315337	0.714779016395284	3.2452197568752e-12	6.57870949113741e-08
	ENSG00000125901.6_4	MRPS26	Gene	Heart failure (pre-LVAD)	iPSC-CVPC	-4.352617501385	0.910639630490819	1.75525068042007e-06	0.0355824417934757
	ENSG00000125991.19_6	ERGIC3	Gene	Heart failure (pre-LVAD)	iPSC-CVPC	-4.21091512431074	0.627832384809753	1.98572385955906e-11	4.02545940809813e-07
	ENSG00000125995.16_4	ROMO1	Gene	Heart failure (pre-LVAD)	iPSC-CVPC	-5.12220778284565	0.762003364532397	1.79212776733946e-11	3.63300140995055e-07
	ENSG00000126012.12_6	KDM5C	Gene	Heart failure (pre-LVAD)	iPSC-CVPC	-3.95985827972766	0.79604083975976	6.5436151997679e-07	0.0132652167329695
	ENSG00000126062.4_5	TMEM115	Gene	Heart failure (pre-LVAD)	iPSC-CVPC	-6.69450540874655	1.0093093194855	3.29469657194819e-11	6.67900889065337e-07
	ENSG00000126254.12_5	RBM42	Gene	Heart failure (pre-LVAD)	iPSC-CVPC	-7.77533788121325	1.16052674716402	2.08654804242954e-11	4.22985019161316e-07
	ENSG00000126261.13_6	UBA2	Gene	Heart failure (pre-LVAD)	iPSC-CVPC	2.25813685129942	0.464294381698378	1.15276402108771e-06	0.0233688322354901
	ENSG00000126432.14_4	PRDX5	Gene	Heart failure (pre-LVAD)	iPSC-CVPC	-3.82849985859141	0.608334892650277	3.10570020809811e-10	6.29587546185649e-06
	ENSG00000126453.9_4	BCL2L12	Gene	Heart failure (pre-LVAD)	iPSC-CVPC	-3.40231185459982	0.661886072275069	2.74258522485449e-07	0.00555976876782502
	ENSG00000126461.15_7	SCAF1	Gene	Heart failure (pre-LVAD)	iPSC-CVPC	-6.93551333738039	0.85668424307968	5.69061183709877e-16	1.15360083161666e-11
	ENSG00000126464.14_4	PRR12	Gene	Heart failure (pre-LVAD)	iPSC-CVPC	-5.59094578842428	0.923884077809269	1.43444188488438e-09	2.90790058903762e-05
	ENSG00000126524.10_5	SBDS	Gene	Heart failure (pre-LVAD)	iPSC-CVPC	3.01421513980694	0.610351612810365	7.87299448396197e-07	0.0159601344178877
	ENSG00000126653.18_7	NSRP1	Gene	Heart failure (pre-LVAD)	iPSC-CVPC	7.09298625224492	0.725056456306566	1.33641024202475e-22	2.70917084263257e-18
	ENSG00000126705.15_7	AHDC1	Gene	Heart failure (pre-LVAD)	iPSC-CVPC	-5.35967124588963	1.12019883747237	1.71352635328301e-06	0.0347366062337532
	ENSG00000126934.14_6	MAP2K2	Gene	Heart failure (pre-LVAD)	iPSC-CVPC	-5.36466600172453	0.769603682968405	3.15398104899996e-12	6.39375038253272e-08
	ENSG00000127220.6_6	ABHD8	Gene	Heart failure (pre-LVAD)	iPSC-CVPC	-5.92867302219203	1.10084158988634	7.22104688224868e-08	0.00146385062396945
	ENSG00000127252.7_8	PLAAT1	Gene	Heart failure (pre-LVAD)	iPSC-CVPC	-2.28883336139014	0.455553021011189	5.05281751328384e-07	0.010243071662929
	ENSG00000127589.4_2	TUBBP1	Gene	Heart failure (pre-LVAD)	iPSC-CVPC	-5.51324157742753	0.538955159690588	1.46273258898171e-24	2.96525150438372e-20
	ENSG00000127616.18_8	SMARCA4	Gene	Heart failure (pre-LVAD)	iPSC-CVPC	-2.64942954697725	0.531740354149506	6.27477144255569e-07	0.0127202166683489
	ENSG00000127663.15_8	KDM4B	Gene	Heart failure (pre-LVAD)	iPSC-CVPC	-3.92289917192399	0.575396556091534	9.24893523362531e-12	1.87494415056052e-07
	ENSG00000128185.10_6	DGCR6L	Gene	Heart failure (pre-LVAD)	iPSC-CVPC	-5.24761777561912	1.10469710313967	2.03137710883767e-06	0.0411800767503572
	ENSG00000128524.5_4	ATP6V1F	Gene	Heart failure (pre-LVAD)	iPSC-CVPC	-3.60796138735712	0.642846236878248	1.99447734870835e-08	0.000404320448130157
	ENSG00000129244.9_5	ATP1B2	Gene	Heart failure (pre-LVAD)	iPSC-CVPC	-2.47175203942027	0.446235913745209	3.04003991341491e-08	0.000616276891247471
	ENSG00000129675.16_5	ARHGEF6	Gene	Heart failure (pre-LVAD)	iPSC-CVPC	3.74751231197884	0.463508912386703	6.21171647193368e-16	1.2592391631904e-11
	ENSG00000129968.15_4	ABHD17A	Gene	Heart failure (pre-LVAD)	iPSC-CVPC	-6.1842116142892	1.01960397639858	1.31701452533275e-09	2.66985184575455e-05
	ENSG00000129991.13_7	TNNI3	Gene	Heart failure (pre-LVAD)	iPSC-CVPC	1.04041466308865	0.200791138307112	2.20018202061301e-07	0.00446020899218669
	ENSG00000130005.13_5	GAMT	Gene	Heart failure (pre-LVAD)	iPSC-CVPC	-3.46392095977551	0.712611703230553	1.16864266884093e-06	0.0236907241827433
	ENSG00000130165.10_7	ELOF1	Gene	Heart failure (pre-LVAD)	iPSC-CVPC	-5.50842139796462	1.11733866265038	8.22515477687957e-07	0.0166740337636903
	ENSG00000130175.9_7	PRKCSH	Gene	Heart failure (pre-LVAD)	iPSC-CVPC	-4.88340863394795	0.595546370077997	2.40627564209626e-16	4.87800198165754e-12
	ENSG00000130202.10_5	NECTIN2	Gene	Heart failure (pre-LVAD)	iPSC-CVPC	-2.7663149506846	0.490908085931639	1.74959274948057e-08	0.000354677442174701
	ENSG00000130305.17_5	NSUN5	Gene	Heart failure (pre-LVAD)	iPSC-CVPC	-4.68816008164923	0.887917866744808	1.29220620316182e-07	0.00261956041504964
	ENSG00000130312.6_4	MRPL34	Gene	Heart failure (pre-LVAD)	iPSC-CVPC	-4.20160974980392	0.785114315038454	8.71848601117049e-08	0.00176741148418448
	ENSG00000130313.7_5	PGLS	Gene	Heart failure (pre-LVAD)	iPSC-CVPC	-5.0431029459516	0.828834469797718	1.16802959120673e-09	2.36782958729428e-05
	ENSG00000130332.15_7	LSM7	Gene	Heart failure (pre-LVAD)	iPSC-CVPC	-4.42806277470756	0.634961177827449	3.08594466453178e-12	6.25582702393883e-08
	ENSG00000130479.11_7	MAP1S	Gene	Heart failure (pre-LVAD)	iPSC-CVPC	-5.60022911168945	0.90609566747872	6.38520779938384e-10	1.29440932509109e-05
	ENSG00000130669.17_5	PAK4	Gene	Heart failure (pre-LVAD)	iPSC-CVPC	-3.87300128481304	0.602080255614662	1.25357434877855e-10	2.54124591984388e-06
	ENSG00000130700.7_5	GATA5	Gene	Heart failure (pre-LVAD)	iPSC-CVPC	-3.30084542173823	0.611223102226412	6.64947847441189e-08	0.00134798227633278
	ENSG00000130723.20_7	PRRC2B	Gene	Heart failure (pre-LVAD)	iPSC-CVPC	-4.05336949123459	0.736759150531604	3.76315570156826e-08	0.000762866923821918
	ENSG00000130726.12_5	TRIM28	Gene	Heart failure (pre-LVAD)	iPSC-CVPC	-3.08486528921134	0.608587348572066	4.00132149467996e-07	0.00811147893401521
	ENSG00000130731.16_8	METTL26	Gene	Heart failure (pre-LVAD)	iPSC-CVPC	-6.05755490841214	1.06287011411409	1.20340689403392e-08	0.000243954645558556
	ENSG00000130751.10_4	NPAS1	Gene	Heart failure (pre-LVAD)	iPSC-CVPC	-2.97123918818417	0.618356085734779	1.54703734948822e-06	0.0313615411488252
	ENSG00000130766.5_4	SESN2	Gene	Heart failure (pre-LVAD)	iPSC-CVPC	-2.7466690684143	0.513936836437149	9.07316193573833e-08	0.00183931138761287
	ENSG00000130770.18_5	ATP5IF1	Gene	Heart failure (pre-LVAD)	iPSC-CVPC	-2.24756364738203	0.469612892616702	1.7014465323368e-06	0.0344917241035316
	ENSG00000130811.12_7	EIF3G	Gene	Heart failure (pre-LVAD)	iPSC-CVPC	-6.05531910057848	0.94361748710498	1.38864422091658e-10	2.81505956464209e-06
	ENSG00000131043.12_5	AAR2	Gene	Heart failure (pre-LVAD)	iPSC-CVPC	-2.90949758749963	0.589340821053957	7.93873384939847e-07	0.0160934012595006
	ENSG00000131116.12_5	ZNF428	Gene	Heart failure (pre-LVAD)	iPSC-CVPC	-5.39031811424297	0.881419417304991	9.62562800102848e-10	1.95130730836849e-05
	ENSG00000131188.12_4	PRR7	Gene	Heart failure (pre-LVAD)	iPSC-CVPC	-3.78095356812372	0.787263381430634	1.56576371053847e-06	0.0317411619400359
	ENSG00000131462.8_4	TUBG1	Gene	Heart failure (pre-LVAD)	iPSC-CVPC	-3.3022108943898	0.602149621199233	4.15727401962021e-08	0.000842762589257409
	ENSG00000131469.15_5	RPL27	Gene	Heart failure (pre-LVAD)	iPSC-CVPC	-2.74630436748679	0.575471254929435	1.82160822339503e-06	0.0369276419046641
	ENSG00000131473.17_8	ACLY	Gene	Heart failure (pre-LVAD)	iPSC-CVPC	-1.6956848329546	0.285173903155825	2.74534188200068e-09	5.56535706319178e-05
	ENSG00000131653.13_6	TRAF7	Gene	Heart failure (pre-LVAD)	iPSC-CVPC	-3.937949271778	0.70354356233462	2.1770705794842e-08	0.000441335747873037
	ENSG00000131748.16_8	STARD3	Gene	Heart failure (pre-LVAD)	iPSC-CVPC	-3.24406027532884	0.641450362514732	4.25048636857667e-07	0.00861658596637862
	ENSG00000131759.18_8	RARA	Gene	Heart failure (pre-LVAD)	iPSC-CVPC	-3.41667353096201	0.640581830283379	9.62296223536713e-08	0.00195076690435362
	ENSG00000132003.9_7	ZSWIM4	Gene	Heart failure (pre-LVAD)	iPSC-CVPC	-3.63166089032311	0.560691135583476	9.34930198136109e-11	1.89529049766152e-06
	ENSG00000132128.16_5	LRRC41	Gene	Heart failure (pre-LVAD)	iPSC-CVPC	-3.37789744038808	0.576142293307941	4.54696247221785e-09	9.21760232368003e-05
	ENSG00000132313.15_6	MRPL35	Gene	Heart failure (pre-LVAD)	iPSC-CVPC	2.42560738529977	0.397520463987033	1.04852466820563e-09	2.12556920738645e-05
	ENSG00000132510.10_4	KDM6B	Gene	Heart failure (pre-LVAD)	iPSC-CVPC	-3.81154765196622	0.53126763150679	7.26038487484913e-13	1.47182522182942e-08
	ENSG00000132661.4_5	NXT1	Gene	Heart failure (pre-LVAD)	iPSC-CVPC	-3.00915376765605	0.589061661318886	3.24924029688604e-07	0.00658685992984738
	ENSG00000132821.12_4	VSTM2L	Gene	Heart failure (pre-LVAD)	iPSC-CVPC	-2.09619676362412	0.436794812557865	1.59426157422983e-06	0.0323188706327871
	ENSG00000133027.18_5	PEMT	Gene	Heart failure (pre-LVAD)	iPSC-CVPC	-4.3987471703725	0.786038451037493	2.192314725016e-08	0.000444426041055244
	ENSG00000133065.11_5	SLC41A1	Gene	Heart failure (pre-LVAD)	iPSC-CVPC	2.17551661218166	0.408309392973886	9.92410180928546e-08	0.00201181391877835
	ENSG00000133134.11_7	BEX2	Gene	Heart failure (pre-LVAD)	iPSC-CVPC	-2.95940307586947	0.585172238811207	4.25190162923446e-07	0.0086194549827841
	ENSG00000133243.10_7	BTBD2	Gene	Heart failure (pre-LVAD)	iPSC-CVPC	-6.71775971274441	1.20465031516256	2.45374043197402e-08	0.000497422260369773
	ENSG00000133250.14_6	ZNF414	Gene	Heart failure (pre-LVAD)	iPSC-CVPC	-6.59065465158683	1.21204924412986	5.39991221688773e-08	0.00109467020460748
	ENSG00000133789.15_4	SWAP70	Gene	Heart failure (pre-LVAD)	iPSC-CVPC	3.08519498658563	0.635208028646055	1.19187453146616e-06	0.024161680501882
	ENSG00000133895.16_8	MEN1	Gene	Heart failure (pre-LVAD)	iPSC-CVPC	-5.48497212026603	0.612342069449237	3.32526040005207e-19	6.74096788298556e-15
	ENSG00000134046.12_6	MBD2	Gene	Heart failure (pre-LVAD)	iPSC-CVPC	2.73012593798038	0.509824145110275	8.55400459374964e-08	0.00173406781124493
	ENSG00000134278.15_5	SPIRE1	Gene	Heart failure (pre-LVAD)	iPSC-CVPC	3.61000898268667	0.688878396456812	1.60215495114879e-07	0.00324788851696883
	ENSG00000134453.16_5	RBM17	Gene	Heart failure (pre-LVAD)	iPSC-CVPC	4.43492186110756	0.671722694360067	4.04798293100476e-11	8.20607099773285e-07
	ENSG00000134575.13_7	ACP2	Gene	Heart failure (pre-LVAD)	iPSC-CVPC	-3.22720289797773	0.562881671646331	9.84607156476448e-09	0.000199599562760906
	ENSG00000134590.14_7	RTL8C	Gene	Heart failure (pre-LVAD)	iPSC-CVPC	-5.76089357360706	0.970311161028308	2.89999872020079e-09	5.87887740559104e-05
	ENSG00000134716.11_6	CYP2J2	Gene	Heart failure (pre-LVAD)	iPSC-CVPC	1.80575674915593	0.275359028833917	5.45976603694674e-11	1.10680377100984e-06
	ENSG00000134825.16_6	TMEM258	Gene	Heart failure (pre-LVAD)	iPSC-CVPC	-5.18698248863482	0.989337243030532	1.58084125237046e-07	0.0032046813868054
	ENSG00000134882.16_7	UBAC2	Gene	Heart failure (pre-LVAD)	iPSC-CVPC	-3.49577846010027	0.646839696123609	6.50268064879076e-08	0.00131822342112286
	ENSG00000135090.14_6	TAOK3	Gene	Heart failure (pre-LVAD)	iPSC-CVPC	3.41488989280841	0.576665071586712	3.1845464834011e-09	6.45571263115071e-05
	ENSG00000135097.7_6	MSI1	Gene	Heart failure (pre-LVAD)	iPSC-CVPC	-2.66621897350276	0.448752988622117	2.82605919698917e-09	5.72898720413645e-05
	ENSG00000135272.11_5	MDFIC	Gene	Heart failure (pre-LVAD)	iPSC-CVPC	4.50561290317438	0.895097041833153	4.81206395737747e-07	0.00975501605439561
	ENSG00000135503.13_6	ACVR1B	Gene	Heart failure (pre-LVAD)	iPSC-CVPC	-3.29740710961524	0.528597120768322	4.43102767029735e-10	8.98257929322679e-06
	ENSG00000135842.17_6	NIBAN1	Gene	Heart failure (pre-LVAD)	iPSC-CVPC	3.01142428671141	0.501430637929227	1.90549609097127e-09	3.86282167561696e-05
	ENSG00000135916.16_7	ITM2C	Gene	Heart failure (pre-LVAD)	iPSC-CVPC	-2.01944756529733	0.417865600000253	1.34647562469883e-06	0.0272957538638947
	ENSG00000135945.10_6	REV1	Gene	Heart failure (pre-LVAD)	iPSC-CVPC	2.75401560932496	0.570435121743203	1.37965914325363e-06	0.0279684501520376
	ENSG00000136003.15_3	ISCU	Gene	Heart failure (pre-LVAD)	iPSC-CVPC	2.62049499672085	0.532838685668645	8.74376554818243e-07	0.0177253615192754
	ENSG00000136235.17_5	GPNMB	Gene	Heart failure (pre-LVAD)	iPSC-CVPC	2.7591138613454	0.578564392678561	1.85237548193367e-06	0.0375513557697594
	ENSG00000136295.15_4	TTYH3	Gene	Heart failure (pre-LVAD)	iPSC-CVPC	-3.05394920676877	0.393743631611314	8.75209971707812e-15	1.77422565464608e-10
	ENSG00000136425.14_6	CIB2	Gene	Heart failure (pre-LVAD)	iPSC-CVPC	-2.56542888910645	0.472238132376949	5.55730970494157e-08	0.00112657782338576
	ENSG00000136436.14_9	CALCOCO2	Gene	Heart failure (pre-LVAD)	iPSC-CVPC	2.87161569428333	0.576682301241202	6.37338048071494e-07	0.0129201169105053
	ENSG00000136448.12_8	NMT1	Gene	Heart failure (pre-LVAD)	iPSC-CVPC	6.44305609577806	1.16113747752242	2.87443729898611e-08	0.000582705929250464
	ENSG00000136522.14_5	MRPL47	Gene	Heart failure (pre-LVAD)	iPSC-CVPC	3.3740144332738	0.636881196198839	1.17261435699408e-07	0.0023771238244984
	ENSG00000136819.15_6	C9orf78	Gene	Heart failure (pre-LVAD)	iPSC-CVPC	3.48424459091436	0.725765338508224	1.58043527915141e-06	0.0320385839789574
	ENSG00000136830.12_6	NIBAN2	Gene	Heart failure (pre-LVAD)	iPSC-CVPC	-3.24811364577136	0.601437624393842	6.64247701652779e-08	0.00134656294079051
	ENSG00000136942.15_5	RPL35	Gene	Heart failure (pre-LVAD)	iPSC-CVPC	-4.00656286955197	0.683505261265337	4.57909697141769e-09	9.28274538045794e-05
	ENSG00000137106.18_5	GRHPR	Gene	Heart failure (pre-LVAD)	iPSC-CVPC	-4.6652210574651	0.615094941507346	3.33631617624786e-14	6.76338015248966e-10
	ENSG00000137161.17_4	CNPY3	Gene	Heart failure (pre-LVAD)	iPSC-CVPC	-3.39886850487376	0.714761360580582	1.98201617554998e-06	0.0401794319107492
	ENSG00000137166.15_6	FOXP4	Gene	Heart failure (pre-LVAD)	iPSC-CVPC	-4.59272510739024	0.719651795850734	1.74937015123536e-10	3.54632317058432e-06
	ENSG00000137267.6_5	TUBB2A	Gene	Heart failure (pre-LVAD)	iPSC-CVPC	-3.00012997620856	0.615219365416411	1.07973357242133e-06	0.0218883589801252
	ENSG00000137392.10_5	CLPS	Gene	Heart failure (pre-LVAD)	iPSC-CVPC	-1.13174342652839	0.112570716192668	8.85516045874387e-24	1.79511812819656e-19
	ENSG00000137501.17_6	SYTL2	Gene	Heart failure (pre-LVAD)	iPSC-CVPC	3.93752382243001	0.713077967984222	3.35410665033427e-08	0.000679944500155763
	ENSG00000138029.14_5	HADHB	Gene	Heart failure (pre-LVAD)	iPSC-CVPC	0.687028174129695	0.137542641462157	5.88298273425323e-07	0.0119259825988781
	ENSG00000138193.15_4	PLCE1	Gene	Heart failure (pre-LVAD)	iPSC-CVPC	3.74360204471417	0.563925162046154	3.16949073833098e-11	6.42519162474456e-07
	ENSG00000138347.15_2	MYPN	Gene	Heart failure (pre-LVAD)	iPSC-CVPC	1.45550605886903	0.199261179686365	2.78270881623372e-13	5.641107312269e-09
	ENSG00000138398.16_5	PPIG	Gene	Heart failure (pre-LVAD)	iPSC-CVPC	5.48184523474919	0.819088361557103	2.19213358493133e-11	4.44389320337279e-07
	ENSG00000138433.16_6	CIR1	Gene	Heart failure (pre-LVAD)	iPSC-CVPC	5.11383549398375	0.82909062275543	6.91567537877874e-10	1.40194571278603e-05
	ENSG00000138594.14_5	TMOD3	Gene	Heart failure (pre-LVAD)	iPSC-CVPC	3.81759642497046	0.733160263639964	1.91874479458689e-07	0.00388967944758654
	ENSG00000138622.4_6	HCN4	Gene	Heart failure (pre-LVAD)	iPSC-CVPC	-2.3527789953345	0.475953804026846	7.68139975445364e-07	0.0155717335822284
	ENSG00000138629.16_7	UBL7	Gene	Heart failure (pre-LVAD)	iPSC-CVPC	-4.06081762415605	0.815034710778854	6.2804955871813e-07	0.0127318206543339
	ENSG00000139112.11_5	GABARAPL1	Gene	Heart failure (pre-LVAD)	iPSC-CVPC	3.94711933278032	0.564486407218754	2.70207488808722e-12	5.47764621313041e-08
	ENSG00000139168.8_8	ZCRB1	Gene	Heart failure (pre-LVAD)	iPSC-CVPC	5.68388746197234	0.934044831414843	1.16316556924297e-09	2.35796924196935e-05
	ENSG00000139637.14_5	C12orf10	Gene	Heart failure (pre-LVAD)	iPSC-CVPC	-5.54914330469457	1.01022899961655	3.95261606486083e-08	0.000801274328668587
	ENSG00000139641.12_4	ESYT1	Gene	Heart failure (pre-LVAD)	iPSC-CVPC	-2.58061582720482	0.540688557118693	1.81653013660044e-06	0.0368246989291641
	ENSG00000139644.13_9	TMBIM6	Gene	Heart failure (pre-LVAD)	iPSC-CVPC	-3.02476021778909	0.558794135227171	6.19728035640392e-08	0.0012563126738502
	ENSG00000139722.7_8	VPS37B	Gene	Heart failure (pre-LVAD)	iPSC-CVPC	-3.99451750684333	0.757894481977419	1.36018749479799e-07	0.00275737208945449
	ENSG00000139835.14_6	GRTP1	Gene	Heart failure (pre-LVAD)	iPSC-CVPC	-4.10266231384899	0.755343853743082	5.58772688338194e-08	0.00113274399379919
	ENSG00000140043.11_4	PTGR2	Gene	Heart failure (pre-LVAD)	iPSC-CVPC	1.71440464890537	0.288834925900457	2.92797135981743e-09	5.93558354062189e-05
	ENSG00000140320.12_6	BAHD1	Gene	Heart failure (pre-LVAD)	iPSC-CVPC	-4.28785597502583	0.898804980210877	1.83660786559489e-06	0.0372317146513396
	ENSG00000140403.12_4	DNAJA4	Gene	Heart failure (pre-LVAD)	iPSC-CVPC	1.73987451596299	0.282364524242474	7.19213834846194e-10	1.4579902860002e-05
	ENSG00000140682.19_6	TGFB1I1	Gene	Heart failure (pre-LVAD)	iPSC-CVPC	-2.04742793160574	0.364596572368993	1.95883133142727e-08	0.000397094287506936
	ENSG00000140740.11_4	UQCRC2	Gene	Heart failure (pre-LVAD)	iPSC-CVPC	1.602602041307	0.265048043925229	1.48064198552848e-09	3.00155743306333e-05
	ENSG00000141447.18_6	OSBPL1A	Gene	Heart failure (pre-LVAD)	iPSC-CVPC	3.31636630376823	0.59563530688247	2.58005394637889e-08	0.000523028536009929
	ENSG00000141526.16_4	SLC16A3	Gene	Heart failure (pre-LVAD)	iPSC-CVPC	-5.68437764449874	1.07163170411611	1.13035846112023e-07	0.00229146267238293
	ENSG00000141543.12_8	EIF4A3	Gene	Heart failure (pre-LVAD)	iPSC-CVPC	-3.49167968757626	0.500297008656084	2.9683688125653e-12	6.01747725683238e-08
	ENSG00000141551.14_7	CSNK1D	Gene	Heart failure (pre-LVAD)	iPSC-CVPC	-4.39758861269709	0.663939656355549	3.50848078126657e-11	7.11239223978359e-07
	ENSG00000141582.15_8	CBX4	Gene	Heart failure (pre-LVAD)	iPSC-CVPC	-3.32089264173546	0.684941355330171	1.24440205400516e-06	0.0252265184387926
	ENSG00000141696.13_10	P3H4	Gene	Heart failure (pre-LVAD)	iPSC-CVPC	-3.32143029857574	0.520023973337824	1.69092591854752e-10	3.42784502207953e-06
	ENSG00000141736.13_6	ERBB2	Gene	Heart failure (pre-LVAD)	iPSC-CVPC	-3.69919454629301	0.492022168649689	5.54721195981162e-14	1.12453080849301e-09
	ENSG00000141858.12_7	SAMD1	Gene	Heart failure (pre-LVAD)	iPSC-CVPC	-4.58996052841096	0.80016387031818	9.67811000737158e-09	0.000196194646069437
	ENSG00000141867.17_8	BRD4	Gene	Heart failure (pre-LVAD)	iPSC-CVPC	-5.65560372616384	0.796801137827976	1.26679509460592e-12	2.56804701578512e-08
	ENSG00000141959.17_3	PFKL	Gene	Heart failure (pre-LVAD)	iPSC-CVPC	-5.61525109610312	1.02487363414831	4.27810768172313e-08	0.000867257989238913
	ENSG00000141971.13_6	MVB12A	Gene	Heart failure (pre-LVAD)	iPSC-CVPC	-5.11088295996347	1.07425114071715	1.95884973742738e-06	0.0397098018771278
	ENSG00000141985.9_7	SH3GL1	Gene	Heart failure (pre-LVAD)	iPSC-CVPC	-3.24041727334915	0.67744293912384	1.72434808401586e-06	0.0349559843591695
	ENSG00000142168.15_3	SOD1	Gene	Heart failure (pre-LVAD)	iPSC-CVPC	2.13497216577094	0.436705348472244	1.01444173241935e-06	0.0205647627996051
	ENSG00000142444.7_6	TIMM29	Gene	Heart failure (pre-LVAD)	iPSC-CVPC	-3.47472465605898	0.706414443105625	8.7068013403414e-07	0.0176504276771401
	ENSG00000142453.12_8	CARM1	Gene	Heart failure (pre-LVAD)	iPSC-CVPC	-8.35604740007883	0.848284943415186	6.81905732858978e-23	1.38235930165172e-18
	ENSG00000142512.15_8	SIGLEC10	Gene	Heart failure (pre-LVAD)	iPSC-CVPC	-2.69339912640587	0.535612620945217	4.93989662400892e-07	0.0100141584361909
	ENSG00000142546.14_8	NOSIP	Gene	Heart failure (pre-LVAD)	iPSC-CVPC	-7.59103462629022	1.00261351531854	3.69658267019332e-14	7.4937123890159e-10
	ENSG00000142611.17_5	PRDM16	Gene	Heart failure (pre-LVAD)	iPSC-CVPC	-2.40013473124968	0.505332076206627	2.03800441805369e-06	0.0413144255627844
	ENSG00000142615.8_5	CELA2A	Gene	Heart failure (pre-LVAD)	iPSC-CVPC	-1.32106521594929	0.165861964453331	1.65427961497113e-15	3.35355563546948e-11
	ENSG00000142789.20_5	CELA3A	Gene	Heart failure (pre-LVAD)	iPSC-CVPC	-1.11841378040057	0.190373794455853	4.23276129328806e-09	8.58065369375356e-05
	ENSG00000143093.15_5	STRIP1	Gene	Heart failure (pre-LVAD)	iPSC-CVPC	-3.29239748871059	0.661951232667407	6.56610056977992e-07	0.0133107990750579
	ENSG00000143126.8_4	CELSR2	Gene	Heart failure (pre-LVAD)	iPSC-CVPC	-1.73095153448843	0.348247621180418	6.67935847850058e-07	0.0135403955076164
	ENSG00000143387.13_6	CTSK	Gene	Heart failure (pre-LVAD)	iPSC-CVPC	2.57984728658894	0.471093155830384	4.34311983531145e-08	0.000880437253014337
	ENSG00000143420.19_5	ENSA	Gene	Heart failure (pre-LVAD)	iPSC-CVPC	4.07041795680967	0.584485490025307	3.30499522642248e-12	6.69988632300365e-08
	ENSG00000143499.14_4	SMYD2	Gene	Heart failure (pre-LVAD)	iPSC-CVPC	1.8695175344468	0.29186686400682	1.49997472984155e-10	3.04074877233479e-06
	ENSG00000143549.21_8	TPM3	Gene	Heart failure (pre-LVAD)	iPSC-CVPC	4.01019050615958	0.555925438310742	5.45156135624346e-13	1.10514051813767e-08
	ENSG00000143614.10_6	GATAD2B	Gene	Heart failure (pre-LVAD)	iPSC-CVPC	-3.22453264557422	0.684102344222384	2.43469335085584e-06	0.0493561036085496
	ENSG00000143633.13_7	C1orf131	Gene	Heart failure (pre-LVAD)	iPSC-CVPC	4.87951503142955	0.790666754012165	6.76910637843317e-10	1.37223324503597e-05
	ENSG00000143761.16_5	ARF1	Gene	Heart failure (pre-LVAD)	iPSC-CVPC	-5.02134587757465	0.912082064394678	3.68401421384748e-08	0.000746823361431161
	ENSG00000144560.15_8	VGLL4	Gene	Heart failure (pre-LVAD)	iPSC-CVPC	-1.51137831904189	0.304654537514174	7.01464139365301e-07	0.0142200810332134
	ENSG00000144785.8_10	AC073896.1	Gene	Heart failure (pre-LVAD)	iPSC-CVPC	-3.08417225633854	0.595148761207064	2.1929901762233e-07	0.00444562968523987
	ENSG00000144824.21_8	PHLDB2	Gene	Heart failure (pre-LVAD)	iPSC-CVPC	3.67357394698934	0.743955888287169	7.89714900608394e-07	0.0160091004651334
	ENSG00000145220.14_7	LYAR	Gene	Heart failure (pre-LVAD)	iPSC-CVPC	5.63653874921624	0.994401238623836	1.44243114364615e-08	0.000292409641439948
	ENSG00000145494.12_3	NDUFS6	Gene	Heart failure (pre-LVAD)	iPSC-CVPC	-2.93725057352653	0.51736782281929	1.36840100160363e-08	0.000277402251045088
	ENSG00000145779.8_6	TNFAIP8	Gene	Heart failure (pre-LVAD)	iPSC-CVPC	-3.07879258574776	0.578048467159776	1.00297447477315e-07	0.00203322985526013
	ENSG00000145934.16_4	TENM2	Gene	Heart failure (pre-LVAD)	iPSC-CVPC	1.80601997294884	0.236936283197113	2.49027681914503e-14	5.04828916777081e-10
	ENSG00000146066.3_5	HIGD2A	Gene	Heart failure (pre-LVAD)	iPSC-CVPC	-3.59765025459252	0.540665765083918	2.8501665711192e-11	5.77785767297284e-07
	ENSG00000147130.14_5	ZMYM3	Gene	Heart failure (pre-LVAD)	iPSC-CVPC	-2.87210444675624	0.553426038158696	2.10654954668005e-07	0.0042703972410298
	ENSG00000147144.13_7	CCDC120	Gene	Heart failure (pre-LVAD)	iPSC-CVPC	-3.28285653966851	0.524162814424826	3.77525857100347e-10	7.65320417513824e-06
	ENSG00000147408.14_5	CSGALNACT1	Gene	Heart failure (pre-LVAD)	iPSC-CVPC	3.15868804592608	0.565234028998107	2.29324934575377e-08	0.000464887507371204
	ENSG00000147419.19_5	CCDC25	Gene	Heart failure (pre-LVAD)	iPSC-CVPC	6.8850763441276	0.678940549653565	3.63688283536337e-24	7.37268888384862e-20
	ENSG00000148090.12_4	AUH	Gene	Heart failure (pre-LVAD)	iPSC-CVPC	2.22839316967803	0.432495557340169	2.57164054222136e-07	0.00521322970719114
	ENSG00000148248.14_5	SURF4	Gene	Heart failure (pre-LVAD)	iPSC-CVPC	-1.62930854596159	0.298619717884245	4.86618723147045e-08	0.00098647347556369
	ENSG00000148303.17_4	RPL7A	Gene	Heart failure (pre-LVAD)	iPSC-CVPC	-2.84078322726245	0.600611099364809	2.24717445761414e-06	0.0455547206047538
	ENSG00000148396.18_6	SEC16A	Gene	Heart failure (pre-LVAD)	iPSC-CVPC	-4.29090543993535	0.590165092866353	3.57664834050723e-13	7.25058151587626e-09
	ENSG00000148468.17_5	FAM171A1	Gene	Heart failure (pre-LVAD)	iPSC-CVPC	-2.69635585572619	0.566525637221757	1.94112018635166e-06	0.0393503884177209
	ENSG00000148516.21_6	ZEB1	Gene	Heart failure (pre-LVAD)	iPSC-CVPC	3.09356720413228	0.652316748711951	2.11168710099833e-06	0.0428081209114381
	ENSG00000148677.6_3	ANKRD1	Gene	Heart failure (pre-LVAD)	iPSC-CVPC	2.23549239381189	0.267941066206333	7.22919077848195e-17	1.46550155461386e-12
	ENSG00000148690.12_5	FRA10AC1	Gene	Heart failure (pre-LVAD)	iPSC-CVPC	3.35699086005368	0.692256286957226	1.23868648483556e-06	0.0251106524205865
	ENSG00000149257.15_7	SERPINH1	Gene	Heart failure (pre-LVAD)	iPSC-CVPC	-2.03618506484166	0.280472880088306	3.87580840443575e-13	7.85703879747215e-09
	ENSG00000149806.11_6	FAU	Gene	Heart failure (pre-LVAD)	iPSC-CVPC	-3.91931332145365	0.740960413549858	1.22648273828721e-07	0.00248632580705583
	ENSG00000149823.9_7	VPS51	Gene	Heart failure (pre-LVAD)	iPSC-CVPC	-5.74010790676479	1.10437382906475	2.01863698325623e-07	0.00409218089245703
	ENSG00000149923.14_4	PPP4C	Gene	Heart failure (pre-LVAD)	iPSC-CVPC	-4.58515259735626	0.414214510291062	1.76357847498747e-28	3.5751262844946e-24
	ENSG00000150347.16_5	ARID5B	Gene	Heart failure (pre-LVAD)	iPSC-CVPC	3.14022739222485	0.537437038016639	5.1278884076802e-09	0.000103952553800493
	ENSG00000151327.12_6	FAM177A1	Gene	Heart failure (pre-LVAD)	iPSC-CVPC	5.78623194607436	0.754905192811613	1.79046090157589e-14	3.62962233967464e-10
	ENSG00000151366.13_7	NDUFC2	Gene	Heart failure (pre-LVAD)	iPSC-CVPC	-4.89961985311684	0.854546812004978	9.83276688904986e-09	0.000199329850374819
	ENSG00000151491.14_10	EPS8	Gene	Heart failure (pre-LVAD)	iPSC-CVPC	2.70947722987048	0.540895063684784	5.46432735082944e-07	0.0110772844056014
	ENSG00000151665.13_6	PIGF	Gene	Heart failure (pre-LVAD)	iPSC-CVPC	5.47551106522465	0.571192488296307	9.14733299378904e-22	1.85434734450091e-17
	ENSG00000152128.13_5	TMEM163	Gene	Heart failure (pre-LVAD)	iPSC-CVPC	-2.50911192086501	0.496439139533947	4.32156464744043e-07	0.00876067585329124
	ENSG00000152234.16_8	ATP5F1A	Gene	Heart failure (pre-LVAD)	iPSC-CVPC	1.01234696648102	0.165557863227958	9.67010438470546e-10	1.96032356086749e-05
	ENSG00000154153.13_7	RETREG1	Gene	Heart failure (pre-LVAD)	iPSC-CVPC	1.35926084771062	0.210442573009839	1.0535652213109e-10	2.13578741664146e-06
	ENSG00000154370.16_6	TRIM11	Gene	Heart failure (pre-LVAD)	iPSC-CVPC	-4.87405942706673	0.790254740769241	6.92875272871592e-10	1.40459675316529e-05
	ENSG00000154721.15_7	JAM2	Gene	Heart failure (pre-LVAD)	iPSC-CVPC	2.58754725072129	0.537785488956597	1.49812370255859e-06	0.0303699636982677
	ENSG00000155657.27_6	TTN	Gene	Heart failure (pre-LVAD)	iPSC-CVPC	1.23016566199238	0.215974681262097	1.22737869986086e-08	0.000248814210035794
	ENSG00000155659.15_7	VSIG4	Gene	Heart failure (pre-LVAD)	iPSC-CVPC	-1.9199842583009	0.381002714524492	4.67255036437742e-07	0.00947219409866591
	ENSG00000156256.15_6	USP16	Gene	Heart failure (pre-LVAD)	iPSC-CVPC	5.77273082929542	0.929748027674911	5.33500790425998e-10	1.08151280235158e-05
	ENSG00000156304.15_6	SCAF4	Gene	Heart failure (pre-LVAD)	iPSC-CVPC	-3.56383676319364	0.675620094240864	1.32819569653763e-07	0.00269251831602108
	ENSG00000156467.10_4	UQCRB	Gene	Heart failure (pre-LVAD)	iPSC-CVPC	2.443723397939	0.512090135067418	1.82353727711899e-06	0.0369667476817562
	ENSG00000156858.11_5	PRR14	Gene	Heart failure (pre-LVAD)	iPSC-CVPC	-4.10684203159983	0.787164946699324	1.81591968550411e-07	0.00368123238645393
	ENSG00000156966.7_4	B3GNT7	Gene	Heart failure (pre-LVAD)	iPSC-CVPC	-3.6848055235488	0.632691135199161	5.7448860752395e-09	0.000116460330517255
	ENSG00000157020.18_6	SEC13	Gene	Heart failure (pre-LVAD)	iPSC-CVPC	-2.58535066802716	0.397831955235119	8.10710019241031e-11	1.64347135100542e-06
	ENSG00000157778.9_5	PSMG3	Gene	Heart failure (pre-LVAD)	iPSC-CVPC	-5.05327708241059	0.788551290941025	1.47146441369842e-10	2.98295265944944e-06
	ENSG00000157881.16_8	PANK4	Gene	Heart failure (pre-LVAD)	iPSC-CVPC	-2.72350164440618	0.561043386482376	1.20781511974878e-06	0.0244848281075473
	ENSG00000157927.17_6	RADIL	Gene	Heart failure (pre-LVAD)	iPSC-CVPC	-4.11680747649295	0.767982683523361	8.29702129699149e-08	0.00168197215732611
	ENSG00000158106.14_5	RHPN1	Gene	Heart failure (pre-LVAD)	iPSC-CVPC	-3.06769788037661	0.622682668196677	8.36800529032402e-07	0.0169636203245449
	ENSG00000158417.11_5	EIF5B	Gene	Heart failure (pre-LVAD)	iPSC-CVPC	2.7416651592968	0.575450026462158	1.89431029458112e-06	0.0384014582917485
	ENSG00000158480.11_5	SPATA2	Gene	Heart failure (pre-LVAD)	iPSC-CVPC	-3.16706177564276	0.613444608977047	2.43346732032534e-07	0.00493312495176353
	ENSG00000158792.16_7	SPATA2L	Gene	Heart failure (pre-LVAD)	iPSC-CVPC	-3.12585227048545	0.656364835627321	1.91332356514213e-06	0.0387868953125613
	ENSG00000158966.16_6	CACHD1	Gene	Heart failure (pre-LVAD)	iPSC-CVPC	-2.80719664603904	0.446710802384075	3.29657256549811e-10	6.68281190477777e-06
	ENSG00000159173.19_7	TNNI1	Gene	Heart failure (pre-LVAD)	iPSC-CVPC	-3.11308998237048	0.442339055766737	1.95310846424776e-12	3.95934147872306e-08
	ENSG00000159339.13_3	PADI4	Gene	Heart failure (pre-LVAD)	iPSC-CVPC	-2.27647936232562	0.45411873769563	5.35988612670264e-07	0.0108655611560516
	ENSG00000159840.16_6	ZYX	Gene	Heart failure (pre-LVAD)	iPSC-CVPC	-2.90525271566335	0.46329345933212	3.59037983630678e-10	7.2784180041611e-06
	ENSG00000160113.5_5	NR2F6	Gene	Heart failure (pre-LVAD)	iPSC-CVPC	-4.2188756764975	0.720812236107021	4.82938618847349e-09	9.79013168127346e-05
	ENSG00000160445.11_7	ZER1	Gene	Heart failure (pre-LVAD)	iPSC-CVPC	-4.10880368813178	0.642809122848369	1.63783601260244e-10	3.32022116474767e-06
	ENSG00000160446.19_8	ZDHHC12	Gene	Heart failure (pre-LVAD)	iPSC-CVPC	-4.53496103430414	0.765364930297815	3.11866074365091e-09	6.32214905952913e-05
	ENSG00000160570.14_7	DEDD2	Gene	Heart failure (pre-LVAD)	iPSC-CVPC	-4.72263381059081	0.864563258115207	4.69607087095357e-08	0.000951987486959708
	ENSG00000160801.14_7	PTH1R	Gene	Heart failure (pre-LVAD)	iPSC-CVPC	-3.65935644674627	0.634177790277918	7.91599012226185e-09	0.000160472951758492
	ENSG00000160813.7_5	PPP1R35	Gene	Heart failure (pre-LVAD)	iPSC-CVPC	-3.06866948788817	0.646625997756672	2.07823815978376e-06	0.0421300439751364
	ENSG00000160877.6_6	NACC1	Gene	Heart failure (pre-LVAD)	iPSC-CVPC	-3.40712520198802	0.574140026496744	2.95082882713009e-09	5.98192019835812e-05
	ENSG00000160993.4_5	ALKBH4	Gene	Heart failure (pre-LVAD)	iPSC-CVPC	-3.67051510417515	0.663866404551063	3.22067556951405e-08	0.000652895351451888
	ENSG00000161016.17_7	RPL8	Gene	Heart failure (pre-LVAD)	iPSC-CVPC	-4.17809713565093	0.838662224180973	6.29762451793451e-07	0.0127665444227568
	ENSG00000161036.13_5	LRWD1	Gene	Heart failure (pre-LVAD)	iPSC-CVPC	-3.73838647807723	0.717079496156941	1.8546038221542e-07	0.00375965286827099
	ENSG00000161179.14_5	YDJC	Gene	Heart failure (pre-LVAD)	iPSC-CVPC	-3.87658404495113	0.776779106275411	6.01959458437512e-07	0.0122029221414452
	ENSG00000161634.12_7	DCD	Gene	Heart failure (pre-LVAD)	iPSC-CVPC	-1.42860195683763	0.134362063661485	2.10440728678479e-26	4.26605445177013e-22
	ENSG00000161642.17_5	ZNF385A	Gene	Heart failure (pre-LVAD)	iPSC-CVPC	-4.36598256554621	0.663292128382391	4.63250187834266e-11	9.39100780777624e-07
	ENSG00000161653.11_4	NAGS	Gene	Heart failure (pre-LVAD)	iPSC-CVPC	-3.12583925338889	0.611052318333293	3.12907911431687e-07	0.00634326918054316
	ENSG00000161847.14_7	RAVER1	Gene	Heart failure (pre-LVAD)	iPSC-CVPC	-5.64340041541141	0.825018150879258	7.9008279756711e-12	1.60165584722805e-07
	ENSG00000162076.13_7	FLYWCH2	Gene	Heart failure (pre-LVAD)	iPSC-CVPC	-4.1635386360751	0.859699134633414	1.27881509687382e-06	0.0259241396438261
	ENSG00000162300.13_6	ZFPL1	Gene	Heart failure (pre-LVAD)	iPSC-CVPC	-4.3662702640755	0.900923010459252	1.25695911593748e-06	0.0254810751982846
	ENSG00000162396.6_5	PARS2	Gene	Heart failure (pre-LVAD)	iPSC-CVPC	-2.47360459634136	0.498400767362189	6.93827554565275e-07	0.0140652721861473
	ENSG00000162430.17_8	SELENON	Gene	Heart failure (pre-LVAD)	iPSC-CVPC	-3.0675481007388	0.590229552861031	2.0229963583388e-07	0.00410101821762442
	ENSG00000162458.13_6	FBLIM1	Gene	Heart failure (pre-LVAD)	iPSC-CVPC	-1.96977542466808	0.383853300466408	2.87314071088817e-07	0.0058244308491125
	ENSG00000162512.16_7	SDC3	Gene	Heart failure (pre-LVAD)	iPSC-CVPC	-3.54419714672396	0.660150975117475	7.92765090817767e-08	0.00160709339210578
	ENSG00000162522.11_4	KIAA1522	Gene	Heart failure (pre-LVAD)	iPSC-CVPC	-2.58079599470748	0.377640222687095	8.25748869136221e-12	1.67395810751295e-07
	ENSG00000162585.17_6	FAAP20	Gene	Heart failure (pre-LVAD)	iPSC-CVPC	-7.70201303192881	1.16877746560013	4.40411104888475e-11	8.92801391829917e-07
	ENSG00000162600.12_6	OMA1	Gene	Heart failure (pre-LVAD)	iPSC-CVPC	2.16599626266401	0.431473893822694	5.16731530453924e-07	0.0104751815853619
	ENSG00000162614.18_5	NEXN	Gene	Heart failure (pre-LVAD)	iPSC-CVPC	3.5415472129927	0.623839065208006	1.37060987002834e-08	0.000277850032852145
	ENSG00000162714.12_5	ZNF496	Gene	Heart failure (pre-LVAD)	iPSC-CVPC	-4.2039381376414	0.720824915459423	5.47272030371958e-09	0.000110942985997003
	ENSG00000162775.16_6	RBM15	Gene	Heart failure (pre-LVAD)	iPSC-CVPC	-3.22801286955999	0.585811103996901	3.5816029670999e-08	0.000726062553490492
	ENSG00000162840.4_4	MT2P1	Gene	Heart failure (pre-LVAD)	iPSC-CVPC	-1.1438109808745	0.202004794642461	1.49360717179367e-08	0.000302784045866013
	ENSG00000163001.11_4	CFAP36	Gene	Heart failure (pre-LVAD)	iPSC-CVPC	2.98110865550444	0.58553374135243	3.55678624897422e-07	0.00721031708392054
	ENSG00000163092.21_6	XIRP2	Gene	Heart failure (pre-LVAD)	iPSC-CVPC	1.51711460089432	0.191369449524897	2.23288616696829e-15	4.52650683767812e-11
	ENSG00000163348.4_6	PYGO2	Gene	Heart failure (pre-LVAD)	iPSC-CVPC	-3.22173647732425	0.637098484574696	4.26150552177762e-07	0.00863892399374759
	ENSG00000163380.16_4	LMOD3	Gene	Heart failure (pre-LVAD)	iPSC-CVPC	1.36683394609287	0.253487374953264	6.9631848761603e-08	0.00141157683809522
	ENSG00000163399.16_5	ATP1A1	Gene	Heart failure (pre-LVAD)	iPSC-CVPC	-2.47111679417215	0.501526848940959	8.3421716870565e-07	0.0169112504440009
	ENSG00000163541.12_7	SUCLG1	Gene	Heart failure (pre-LVAD)	iPSC-CVPC	1.27365490388473	0.237236586080669	7.9300940883919e-08	0.00160758867359881
	ENSG00000163564.15_5	PYHIN1	Gene	Heart failure (pre-LVAD)	iPSC-CVPC	-2.55100405021839	0.468611723876736	5.21710657114063e-08	0.00105761184410163
	ENSG00000163681.16_6	SLMAP	Gene	Heart failure (pre-LVAD)	iPSC-CVPC	3.82444673181373	0.633091914621501	1.5325426736716e-09	3.10677050806707e-05
	ENSG00000163833.8_4	FBXO40	Gene	Heart failure (pre-LVAD)	iPSC-CVPC	1.43367199581488	0.212946776248213	1.66730261847091e-11	3.37995586816423e-07
	ENSG00000163902.12_6	RPN1	Gene	Heart failure (pre-LVAD)	iPSC-CVPC	-1.67209059049844	0.3261109920402	2.93823117925488e-07	0.00595638224658549
	ENSG00000164022.17_4	AIMP1	Gene	Heart failure (pre-LVAD)	iPSC-CVPC	5.44036541128754	1.11605856665752	1.09016121205782e-06	0.0220997480908361
	ENSG00000164081.12_8	TEX264	Gene	Heart failure (pre-LVAD)	iPSC-CVPC	-5.35197796780682	1.04405372640663	2.95724084761828e-07	0.00599491864629178
	ENSG00000164172.19_7	MOCS2	Gene	Heart failure (pre-LVAD)	iPSC-CVPC	2.95800344228346	0.54489994319151	5.68214082447305e-08	0.00115188358793718
	ENSG00000164182.11_6	NDUFAF2	Gene	Heart failure (pre-LVAD)	iPSC-CVPC	3.88341608075689	0.758143332769966	3.01876605520631e-07	0.00611964254711423
	ENSG00000164309.15_4	CMYA5	Gene	Heart failure (pre-LVAD)	iPSC-CVPC	2.2048403898471	0.260774417149983	2.79154380346184e-17	5.65901759837784e-13
	ENSG00000164405.11_4	UQCRQ	Gene	Heart failure (pre-LVAD)	iPSC-CVPC	1.68702718540743	0.27300789799127	6.43424210862596e-10	1.30434956026065e-05
	ENSG00000164440.15_7	TXLNB	Gene	Heart failure (pre-LVAD)	iPSC-CVPC	1.67380965867709	0.254636133801855	4.9199229677847e-11	9.97366784029314e-07
	ENSG00000164535.15_6	DAGLB	Gene	Heart failure (pre-LVAD)	iPSC-CVPC	-3.79188692629925	0.742697425771197	3.29814771609405e-07	0.00668600505006586
	ENSG00000164610.9_8	RP9	Gene	Heart failure (pre-LVAD)	iPSC-CVPC	2.75416879025694	0.53522863802142	2.66411581020627e-07	0.00540069557045015
	ENSG00000164611.13_5	PTTG1	Gene	Heart failure (pre-LVAD)	iPSC-CVPC	-2.6262551385881	0.556482746190602	2.36561212004658e-06	0.0479556888975843
	ENSG00000164897.14_7	TMUB1	Gene	Heart failure (pre-LVAD)	iPSC-CVPC	-6.07974977267223	0.833747082397052	3.05207602467307e-13	6.18716851721725e-09
	ENSG00000165264.6	NDUFB6	Gene	Heart failure (pre-LVAD)	iPSC-CVPC	1.7163047882704	0.340371396952971	4.59615665473777e-07	0.00931732877048441
	ENSG00000165282.14_7	PIGO	Gene	Heart failure (pre-LVAD)	iPSC-CVPC	-4.57620899214959	0.90300793805642	4.02567829476122e-07	0.00816085503913994
	ENSG00000165525.18_5	NEMF	Gene	Heart failure (pre-LVAD)	iPSC-CVPC	5.97707415964856	0.963235398411033	5.46252703201656e-10	1.1073634799304e-05
	ENSG00000165591.6_2	FAAH2	Gene	Heart failure (pre-LVAD)	iPSC-CVPC	-3.20767261792055	0.585188245163066	4.21884472954266e-08	0.000855244203572888
	ENSG00000165629.20_5	ATP5F1C	Gene	Heart failure (pre-LVAD)	iPSC-CVPC	1.40954208967601	0.238560577503366	3.45176061602304e-09	6.99740912080191e-05
	ENSG00000165630.14_5	PRPF18	Gene	Heart failure (pre-LVAD)	iPSC-CVPC	5.01779690061957	0.897252219149256	2.23946980271882e-08	0.000453985318407159
	ENSG00000165644.11_7	COMTD1	Gene	Heart failure (pre-LVAD)	iPSC-CVPC	-3.37547280600918	0.689723947977831	9.88332033495581e-07	0.0200354669830224
	ENSG00000165672.7_5	PRDX3	Gene	Heart failure (pre-LVAD)	iPSC-CVPC	2.81397450541614	0.579317013954487	1.18937127110667e-06	0.0241109344078744
	ENSG00000165684.4_5	SNAPC4	Gene	Heart failure (pre-LVAD)	iPSC-CVPC	-3.6307787535698	0.748909352039177	1.24656843938474e-06	0.0252704354032074
	ENSG00000165716.11_5	DIPK1B	Gene	Heart failure (pre-LVAD)	iPSC-CVPC	-3.84407242955789	0.659914182616089	5.70751364852274e-09	0.000115702716682853
	ENSG00000166145.14_4	SPINT1	Gene	Heart failure (pre-LVAD)	iPSC-CVPC	-3.47897847653425	0.630868999682577	3.49610989809957e-08	0.000708731398542745
	ENSG00000166189.8_4	HPS6	Gene	Heart failure (pre-LVAD)	iPSC-CVPC	-3.39810658794541	0.681321445264566	6.11582435521101e-07	0.0123979991328838
	ENSG00000166275.16_5	BORCS7	Gene	Heart failure (pre-LVAD)	iPSC-CVPC	4.79672437694495	0.962724729428371	6.27853804374498e-07	0.0127278523222798
	ENSG00000166313.19_8	APBB1	Gene	Heart failure (pre-LVAD)	iPSC-CVPC	-4.16896318986625	0.860155000372423	1.25495309122834e-06	0.0254404090653809
	ENSG00000166484.20_5	MAPK7	Gene	Heart failure (pre-LVAD)	iPSC-CVPC	-5.60005995689087	0.582978073324408	7.54566478269556e-22	1.52965716474804e-17
	ENSG00000166548.16_7	TK2	Gene	Heart failure (pre-LVAD)	iPSC-CVPC	3.20353553159844	0.605212537793878	1.20167700725629e-07	0.00243603962910995
	ENSG00000166780.11_7	BMERB1	Gene	Heart failure (pre-LVAD)	iPSC-CVPC	2.41031463737014	0.474478554417871	3.77587395927868e-07	0.00765445169024974
	ENSG00000166912.17_5	MTMR10	Gene	Heart failure (pre-LVAD)	iPSC-CVPC	4.97522869160067	0.785866213582592	2.43758841863029e-10	4.94147924224732e-06
	ENSG00000166925.9_8	TSC22D4	Gene	Heart failure (pre-LVAD)	iPSC-CVPC	-6.15833136792443	0.898182097444429	7.05978722845141e-12	1.43116006695167e-07
	ENSG00000167106.12_5	FAM102A	Gene	Heart failure (pre-LVAD)	iPSC-CVPC	-4.23099520584626	0.87972176842301	1.51331218213565e-06	0.0306778645562539
	ENSG00000167136.7_4	ENDOG	Gene	Heart failure (pre-LVAD)	iPSC-CVPC	-2.65873320042775	0.546112021901308	1.12462252239706e-06	0.0227983477740332
	ENSG00000167208.15_6	SNX20	Gene	Heart failure (pre-LVAD)	iPSC-CVPC	-1.47729232191361	0.305263476616969	1.30231155616358e-06	0.0264004598665481
	ENSG00000167395.10_7	ZNF646	Gene	Heart failure (pre-LVAD)	iPSC-CVPC	-3.60853873539747	0.631921137187296	1.12693894105052e-08	0.000228453062129761
	ENSG00000167468.17_7	GPX4	Gene	Heart failure (pre-LVAD)	iPSC-CVPC	-5.17894613060204	0.953549820319939	5.59676885182702e-08	0.00113457698164237
	ENSG00000167470.12_5	MIDN	Gene	Heart failure (pre-LVAD)	iPSC-CVPC	-3.63504855393236	0.510632555616292	1.08936477990759e-12	2.20836028182867e-08
	ENSG00000167491.17_6	GATAD2A	Gene	Heart failure (pre-LVAD)	iPSC-CVPC	-4.60219841737904	0.58098925357761	2.35013258889805e-15	4.76418878421413e-11
	ENSG00000167526.13_5	RPL13	Gene	Heart failure (pre-LVAD)	iPSC-CVPC	-4.94779304094846	0.977681743266885	4.17632541024936e-07	0.0084662468716575
	ENSG00000167536.14_5	DHRS13	Gene	Heart failure (pre-LVAD)	iPSC-CVPC	-3.53104037641212	0.552665470548805	1.66854218651396e-10	3.3824687205011e-06
	ENSG00000167566.17_5	NCKAP5L	Gene	Heart failure (pre-LVAD)	iPSC-CVPC	-4.02359202788945	0.788597099570392	3.35700887792338e-07	0.00680532839732628
	ENSG00000167674.15_10	HDGFL2	Gene	Heart failure (pre-LVAD)	iPSC-CVPC	-3.53028693628611	0.694513889095179	3.71314541808522e-07	0.00752728839154236
	ENSG00000167693.17_6	NXN	Gene	Heart failure (pre-LVAD)	iPSC-CVPC	-2.81594455574376	0.486259410730508	6.99546052094188e-09	0.000141811975680534
	ENSG00000167700.9_4	MFSD3	Gene	Heart failure (pre-LVAD)	iPSC-CVPC	-3.79021929684072	0.66612014133079	1.27044182728465e-08	0.000257543967227144
	ENSG00000167768.4_4	KRT1	Gene	Heart failure (pre-LVAD)	iPSC-CVPC	-1.56402208629128	0.324159347211797	1.40104640202397e-06	0.0284020126618299
	ENSG00000167770.11_4	OTUB1	Gene	Heart failure (pre-LVAD)	iPSC-CVPC	-3.55967697583792	0.635923955430134	2.17282263207987e-08	0.000440474603975231
	ENSG00000167771.6_5	RCOR2	Gene	Heart failure (pre-LVAD)	iPSC-CVPC	-2.58904788793392	0.515780499959993	5.17603286120484e-07	0.0104928538162345
	ENSG00000167815.12_6	PRDX2	Gene	Heart failure (pre-LVAD)	iPSC-CVPC	-3.14690210977403	0.5087520166323	6.18931996060274e-10	1.25469894241339e-05
	ENSG00000167962.14_7	ZNF598	Gene	Heart failure (pre-LVAD)	iPSC-CVPC	-5.71595668914991	0.818808574275516	2.93458493917493e-12	5.94899058869542e-08
	ENSG00000167969.13_7	ECI1	Gene	Heart failure (pre-LVAD)	iPSC-CVPC	-2.90811155531422	0.555197412403679	1.62345846914445e-07	0.00329107500864963
	ENSG00000167986.14_5	DDB1	Gene	Heart failure (pre-LVAD)	iPSC-CVPC	-2.83117748133183	0.468287373585813	1.48659248295349e-09	3.01362028144332e-05
	ENSG00000168040.5_3	FADD	Gene	Heart failure (pre-LVAD)	iPSC-CVPC	-2.87991609113952	0.48504323316151	2.89503313856068e-09	5.86881117849021e-05
	ENSG00000168140.5_4	VASN	Gene	Heart failure (pre-LVAD)	iPSC-CVPC	-2.37344530876576	0.450468216192473	1.37287977146785e-07	0.00278310187271963
	ENSG00000168259.17_8	DNAJC7	Gene	Heart failure (pre-LVAD)	iPSC-CVPC	3.69381094144906	0.659261327926333	2.10729077572149e-08	0.00042718998605426
	ENSG00000168286.3_4	THAP11	Gene	Heart failure (pre-LVAD)	iPSC-CVPC	-5.07888087891559	1.03984216135354	1.0380716582295e-06	0.0210437886556284
	ENSG00000168386.18_6	FILIP1L	Gene	Heart failure (pre-LVAD)	iPSC-CVPC	3.16813404439966	0.487944939896446	8.42496202622607e-11	1.70790830195655e-06
	ENSG00000168393.13_8	DTYMK	Gene	Heart failure (pre-LVAD)	iPSC-CVPC	-3.35350828027149	0.678742868049223	7.78170787400043e-07	0.0157750782021737
	ENSG00000168484.12_7	SFTPC	Gene	Heart failure (pre-LVAD)	iPSC-CVPC	-1.49110711345897	0.305914262044746	1.09214426512371e-06	0.0221399485425879
	ENSG00000168818.10_6	STX18	Gene	Heart failure (pre-LVAD)	iPSC-CVPC	6.90219338533782	1.08381234136869	1.90960998918872e-10	3.87116137008337e-06
	ENSG00000168878.19_7	SFTPB	Gene	Heart failure (pre-LVAD)	iPSC-CVPC	-1.33626853579391	0.24202733273765	3.36793437995639e-08	0.000682747657504759
	ENSG00000168925.12_7	CTRB1	Gene	Heart failure (pre-LVAD)	iPSC-CVPC	-1.4792897519727	0.217381679503837	1.0102527149304e-11	2.04798430370691e-07
	ENSG00000169020.10_6	ATP5ME	Gene	Heart failure (pre-LVAD)	iPSC-CVPC	1.25338219978136	0.257901797794755	1.17432979458708e-06	0.0238060135958693
	ENSG00000169083.17_8	AR	Gene	Heart failure (pre-LVAD)	iPSC-CVPC	3.54885162088352	0.702030753008262	4.3011406922331e-07	0.00871927241129494
	ENSG00000169100.14_5	SLC25A6	Gene	Heart failure (pre-LVAD)	iPSC-CVPC	-3.75194972930582	0.747482221038629	5.1819596445335e-07	0.0105048685913983
	ENSG00000169100.14_5_PAR_Y	SLC25A6	Gene	Heart failure (pre-LVAD)	iPSC-CVPC	-3.74959912753792	0.733523953745639	3.19169493681905e-07	0.00647020397591958
	ENSG00000169221.14_5	TBC1D10B	Gene	Heart failure (pre-LVAD)	iPSC-CVPC	-5.12214822183234	1.04989082384016	1.06763701881526e-06	0.021643137645423
	ENSG00000169223.15_7	LMAN2	Gene	Heart failure (pre-LVAD)	iPSC-CVPC	-4.03790800141798	0.495610819785583	3.7202813282978e-16	7.5417543087253e-12
	ENSG00000169474.4_3	SPRR1A	Gene	Heart failure (pre-LVAD)	iPSC-CVPC	-1.03277722914128	0.0987815023192111	1.38752256215393e-25	2.81278573799845e-21
	ENSG00000169554.21_8	ZEB2	Gene	Heart failure (pre-LVAD)	iPSC-CVPC	3.39979311681096	0.604277382796835	1.84209130546079e-08	0.000373428749443011
	ENSG00000169564.7_5	PCBP1	Gene	Heart failure (pre-LVAD)	iPSC-CVPC	-4.68102425493285	0.567910003843457	1.68584458260834e-16	3.41754413786363e-12
	ENSG00000169682.18_6	SPNS1	Gene	Heart failure (pre-LVAD)	iPSC-CVPC	-4.66972788861789	0.795575872515331	4.36795653857952e-09	8.8547214950084e-05
	ENSG00000169683.8_5	LRRC45	Gene	Heart failure (pre-LVAD)	iPSC-CVPC	-3.86648877168083	0.809473934348212	1.78332552639684e-06	0.0361515750711167
	ENSG00000169727.12_6	GPS1	Gene	Heart failure (pre-LVAD)	iPSC-CVPC	-5.04624457977165	1.02658405381175	8.85250388854072e-07	0.0179457958828498
	ENSG00000169783.12_7	LINGO1	Gene	Heart failure (pre-LVAD)	iPSC-CVPC	-3.5735220589454	0.59382416806584	1.76790610357206e-09	3.58389925316128e-05
	ENSG00000169813.16_5	HNRNPF	Gene	Heart failure (pre-LVAD)	iPSC-CVPC	-3.06653925690195	0.571547980564834	8.08046965614415e-08	0.00163807280869354
	ENSG00000169976.7_4	SF3B5	Gene	Heart failure (pre-LVAD)	iPSC-CVPC	-2.91026295036362	0.583730569813233	6.1761161026577e-07	0.0125202225633077
	ENSG00000170265.12_5	ZNF282	Gene	Heart failure (pre-LVAD)	iPSC-CVPC	-4.99114397150309	0.762967492545344	6.08023514452636e-11	1.23258526849838e-06
	ENSG00000170266.16_6	GLB1	Gene	Heart failure (pre-LVAD)	iPSC-CVPC	-2.17434367767896	0.342322017223851	2.12879884415364e-10	4.31550101686826e-06
	ENSG00000170417.16_4	TMEM182	Gene	Heart failure (pre-LVAD)	iPSC-CVPC	1.10240103543377	0.207616437460521	1.09747698973671e-07	0.00222480535359426
	ENSG00000170421.12_8	KRT8	Gene	Heart failure (pre-LVAD)	iPSC-CVPC	-1.72243319254276	0.327829804605006	1.48792905539209e-07	0.00301632978109084
	ENSG00000170604.5_4	IRF2BP1	Gene	Heart failure (pre-LVAD)	iPSC-CVPC	-7.78521499878005	1.04344061977803	8.58029775047895e-14	1.73939795997709e-09
	ENSG00000170624.13_3	SGCD	Gene	Heart failure (pre-LVAD)	iPSC-CVPC	3.23347215654293	0.637962385333707	4.01095699424508e-07	0.00813101201873363
	ENSG00000170681.7_7	CAVIN4	Gene	Heart failure (pre-LVAD)	iPSC-CVPC	2.00232309471661	0.390986731204475	3.03589830453653e-07	0.00615437304295645
	ENSG00000170807.12_5	LMOD2	Gene	Heart failure (pre-LVAD)	iPSC-CVPC	1.91972784654548	0.191773009465839	1.37172740116688e-23	2.7807657876455e-19
	ENSG00000170892.12_8	TSEN34	Gene	Heart failure (pre-LVAD)	iPSC-CVPC	-3.97364726632995	0.689208631281606	8.14056636730257e-09	0.000165025561397958
	ENSG00000171159.5_4	C9orf16	Gene	Heart failure (pre-LVAD)	iPSC-CVPC	-5.79351231592319	0.901183976681055	1.28633271046895e-10	2.60765367066266e-06
	ENSG00000171161.13_6	ZNF672	Gene	Heart failure (pre-LVAD)	iPSC-CVPC	-4.40141715347152	0.727273456978764	1.43109542912048e-09	2.90111665391304e-05
	ENSG00000171195.11_5	MUC7	Gene	Heart failure (pre-LVAD)	iPSC-CVPC	-1.3361494214145	0.179705553562319	1.0439804733986e-13	2.11635721567364e-09
	ENSG00000171219.9_6	CDC42BPG	Gene	Heart failure (pre-LVAD)	iPSC-CVPC	-2.70992170112171	0.542533874983394	5.8855440701534e-07	0.011931174939015
	ENSG00000171222.10_4	SCAND1	Gene	Heart failure (pre-LVAD)	iPSC-CVPC	-7.61795224110955	1.30694084629228	5.58131762268722e-09	0.000113144470847115
	ENSG00000171345.13_6	KRT19	Gene	Heart failure (pre-LVAD)	iPSC-CVPC	-4.17243097917662	0.541307831912046	1.27748883968331e-14	2.58972537580601e-10
	ENSG00000171425.10_7	ZNF581	Gene	Heart failure (pre-LVAD)	iPSC-CVPC	-5.0087537130425	0.702800068477399	1.0268866553173e-12	2.08170462765923e-08
	ENSG00000171658.8_5	NMRAL2P	Gene	Heart failure (pre-LVAD)	iPSC-CVPC	-2.9495133873581	0.525595191389801	2.00280590004223e-08	0.000406008812056561
	ENSG00000171813.14_4	PWWP2B	Gene	Heart failure (pre-LVAD)	iPSC-CVPC	-3.13190750270102	0.563706111085814	2.76149281706084e-08	0.000559809823874574
	ENSG00000171858.18_4	RPS21	Gene	Heart failure (pre-LVAD)	iPSC-CVPC	-3.52568297358935	0.694864076662352	3.89708143525494e-07	0.00790016348554882
	ENSG00000171863.15_7	RPS7	Gene	Heart failure (pre-LVAD)	iPSC-CVPC	-3.83036972479801	0.576201092741474	2.9785671616869e-11	6.03815135017168e-07
	ENSG00000171992.13_4	SYNPO	Gene	Heart failure (pre-LVAD)	iPSC-CVPC	2.69306587357544	0.43629050479304	6.7157404592824e-10	1.36141490590573e-05
	ENSG00000172023.8_6	REG1B	Gene	Heart failure (pre-LVAD)	iPSC-CVPC	-1.31436066500351	0.162813320672387	6.86996375029605e-16	1.39267905146002e-11
	ENSG00000172081.14_7	MOB3A	Gene	Heart failure (pre-LVAD)	iPSC-CVPC	-3.64940888402268	0.620805382268738	4.13982907162908e-09	8.39226149400647e-05
	ENSG00000172354.10_7	GNB2	Gene	Heart failure (pre-LVAD)	iPSC-CVPC	-5.57529400094998	0.763767526832005	2.88353417823344e-13	5.84550048611483e-09
	ENSG00000172399.6_3	MYOZ2	Gene	Heart failure (pre-LVAD)	iPSC-CVPC	1.85599698794404	0.339331109990564	4.51115759798347e-08	0.000914501868263209
	ENSG00000172403.11_8	SYNPO2	Gene	Heart failure (pre-LVAD)	iPSC-CVPC	4.0339211814852	0.837116057337866	1.44401479711121e-06	0.0292730679670385
	ENSG00000172500.13_6	FIBP	Gene	Heart failure (pre-LVAD)	iPSC-CVPC	-5.13647460725385	0.923421647084873	2.66033298849973e-08	0.000539302703428665
	ENSG00000172531.15_7	PPP1CA	Gene	Heart failure (pre-LVAD)	iPSC-CVPC	-3.1919936700764	0.653839436966046	1.05056374786865e-06	0.0212970282967933
	ENSG00000172534.14_7	HCFC1	Gene	Heart failure (pre-LVAD)	iPSC-CVPC	-5.28401227563959	0.870467434685714	1.27658915571382e-09	2.58790153646306e-05
	ENSG00000172724.12_6	CCL19	Gene	Heart failure (pre-LVAD)	iPSC-CVPC	-1.65044451147681	0.333869084346051	7.67763638840244e-07	0.0155641044865694
	ENSG00000172867.4_5	KRT2	Gene	Heart failure (pre-LVAD)	iPSC-CVPC	-1.79565536707886	0.251756668329187	9.85594304649516e-13	1.9979967743855e-08
	ENSG00000172992.12_6	DCAKD	Gene	Heart failure (pre-LVAD)	iPSC-CVPC	-2.95680126751526	0.603010628615644	9.41927384294245e-07	0.0190947519344129
	ENSG00000173039.19_9	RELA	Gene	Heart failure (pre-LVAD)	iPSC-CVPC	-3.42466798687473	0.557794125972889	8.26967016988673e-10	1.67642753683944e-05
	ENSG00000173065.13_7	FAM222B	Gene	Heart failure (pre-LVAD)	iPSC-CVPC	-3.5178254794026	0.53606288208154	5.29708026266655e-11	1.07382411084776e-06
	ENSG00000173409.14_5	ARV1	Gene	Heart failure (pre-LVAD)	iPSC-CVPC	2.45477797592278	0.513278197405989	1.73086434333178e-06	0.0350880819680218
	ENSG00000173456.5_4	RNF26	Gene	Heart failure (pre-LVAD)	iPSC-CVPC	-3.55047689863914	0.736589061660578	1.434433577466e-06	0.0290788374823907
	ENSG00000173621.9_5	LRFN4	Gene	Heart failure (pre-LVAD)	iPSC-CVPC	-5.52915280911404	0.968327423332652	1.12973964828735e-08	0.000229020821500812
	ENSG00000173660.12_4	UQCRH	Gene	Heart failure (pre-LVAD)	iPSC-CVPC	1.5299216227257	0.28483067502422	7.81548739452966e-08	0.00158435560461905
	ENSG00000173786.17_7	CNP	Gene	Heart failure (pre-LVAD)	iPSC-CVPC	-2.47671767895355	0.513945524352125	1.44259581257101e-06	0.0292443023124395
	ENSG00000174021.11_6	GNG5	Gene	Heart failure (pre-LVAD)	iPSC-CVPC	-2.54078745524719	0.493812433741122	2.67167571590682e-07	0.0054160210112863
	ENSG00000174276.7_5	ZNHIT2	Gene	Heart failure (pre-LVAD)	iPSC-CVPC	-4.70277696439128	0.981079936644236	1.63921214466349e-06	0.0332301085966183
	ENSG00000174720.16_8	LARP7	Gene	Heart failure (pre-LVAD)	iPSC-CVPC	3.92309176315239	0.680990255409895	8.3684801991611e-09	0.000169645830597394
	ENSG00000174748.22_9	RPL15	Gene	Heart failure (pre-LVAD)	iPSC-CVPC	-3.25757437882108	0.651778553866746	5.79348205995636e-07	0.0117445468319435
	ENSG00000174886.14_7	NDUFA11	Gene	Heart failure (pre-LVAD)	iPSC-CVPC	-3.82957003168111	0.683768425547454	2.13509169965303e-08	0.000432825789353662
	ENSG00000175130.7_5	MARCKSL1	Gene	Heart failure (pre-LVAD)	iPSC-CVPC	-2.22010164322449	0.46714583698481	2.00935808871667e-06	0.0407337071744643
	ENSG00000175213.3_4	ZNF408	Gene	Heart failure (pre-LVAD)	iPSC-CVPC	-4.05348494369908	0.849082511018068	1.80639332520724e-06	0.0366192054886012
	ENSG00000175445.17_7	LPL	Gene	Heart failure (pre-LVAD)	iPSC-CVPC	2.27559507032323	0.377466887689195	1.65390955635364e-09	3.3528054526401e-05
	ENSG00000175467.15_4	SART1	Gene	Heart failure (pre-LVAD)	iPSC-CVPC	-4.3344630940077	0.833256483161317	1.97329930981732e-07	0.00400027236086167
	ENSG00000175535.6_3	PNLIP	Gene	Heart failure (pre-LVAD)	iPSC-CVPC	-1.22099497057913	0.23439373706912	1.89695336699671e-07	0.00384550386557573
	ENSG00000175573.7_5	C11orf68	Gene	Heart failure (pre-LVAD)	iPSC-CVPC	-4.58081083315897	0.877748658350883	1.80068227429213e-07	0.00365034310644501
	ENSG00000175646.4_5	PRM1	Gene	Heart failure (pre-LVAD)	iPSC-CVPC	-1.13325998217588	0.106864738486292	2.83613448071292e-26	5.74941181930123e-22
	ENSG00000175886.10_5	RPL7AP66	Gene	Heart failure (pre-LVAD)	iPSC-CVPC	-4.77725811840609	0.678161870538583	1.86233490425306e-12	3.7753253179018e-08
	ENSG00000175938.7_6	ORAI3	Gene	Heart failure (pre-LVAD)	iPSC-CVPC	-4.75145895930209	0.574590103763518	1.34745817734682e-16	2.73156721711747e-12
	ENSG00000176390.12_6	CRLF3	Gene	Heart failure (pre-LVAD)	iPSC-CVPC	-2.34799653678874	0.475805610066628	8.02406985902172e-07	0.0162663944182088
	ENSG00000176428.6_4	VPS37D	Gene	Heart failure (pre-LVAD)	iPSC-CVPC	-3.27051838183714	0.598272168860026	4.58733482115183e-08	0.000929944514943899
	ENSG00000176619.13_7	LMNB2	Gene	Heart failure (pre-LVAD)	iPSC-CVPC	-2.99312631846814	0.569678912499443	1.48783608097187e-07	0.00301614130334617
	ENSG00000177045.10_8	SIX5	Gene	Heart failure (pre-LVAD)	iPSC-CVPC	-6.10965896814369	0.994874527334073	8.19338139215923e-10	1.66096227581852e-05
	ENSG00000177051.6_7	FBXO46	Gene	Heart failure (pre-LVAD)	iPSC-CVPC	-4.47932928554465	0.706910210940379	2.35058855036796e-10	4.76511310930593e-06
	ENSG00000177733.7_5	HNRNPA0	Gene	Heart failure (pre-LVAD)	iPSC-CVPC	-4.02011188554949	0.568574346336707	1.54362797690277e-12	3.1292426347773e-08
	ENSG00000178035.12_5	IMPDH2	Gene	Heart failure (pre-LVAD)	iPSC-CVPC	-3.79890632411439	0.662243544250167	9.66993717012306e-09	0.000196028966312735
	ENSG00000178127.13_5	NDUFV2	Gene	Heart failure (pre-LVAD)	iPSC-CVPC	2.09591882757774	0.226218323306263	1.95028348443336e-20	3.95361467964331e-16
	ENSG00000178372.8_5	CALML5	Gene	Heart failure (pre-LVAD)	iPSC-CVPC	-1.67492330369795	0.192545148753329	3.35234628285377e-18	6.79587638460116e-14
	ENSG00000178464.6_4	RPL10P16	Gene	Heart failure (pre-LVAD)	iPSC-CVPC	-6.97486775912516	0.764086823577025	6.95379202753158e-20	1.4096727198212e-15
	ENSG00000178896.9_6	EXOSC4	Gene	Heart failure (pre-LVAD)	iPSC-CVPC	-6.21420532371521	0.850393496784876	2.72265856769337e-13	5.519373448428e-09
	ENSG00000178921.14_9	PFAS	Gene	Heart failure (pre-LVAD)	iPSC-CVPC	-3.38925972000893	0.656882666743972	2.47462089796662e-07	0.00501655148435793
	ENSG00000178947.9_4	SMIM10L2A	Gene	Heart failure (pre-LVAD)	iPSC-CVPC	-2.39965955488595	0.441307872243491	5.40003860716687e-08	0.00109469582644487
	ENSG00000179051.14_6	RCC2	Gene	Heart failure (pre-LVAD)	iPSC-CVPC	-2.32662469994832	0.466312506422293	6.05637020214692e-07	0.0122774736737922
	ENSG00000179085.8_4	DPM3	Gene	Heart failure (pre-LVAD)	iPSC-CVPC	-5.78407469613589	0.767438241150641	4.81422139766862e-14	9.75938961735383e-10
	ENSG00000179115.11_5	FARSA	Gene	Heart failure (pre-LVAD)	iPSC-CVPC	-3.70640988044654	0.60339700929947	8.11955931387298e-10	1.64599706410833e-05
	ENSG00000179134.15_5	SAMD4B	Gene	Heart failure (pre-LVAD)	iPSC-CVPC	-4.20619034443026	0.83500849637744	4.72138435422101e-07	0.00957119036287683
	ENSG00000179611.3_5	DGKZP1	Gene	Heart failure (pre-LVAD)	iPSC-CVPC	-3.60197039606717	0.48850809072467	1.66318097470691e-13	3.37160047192585e-09
	ENSG00000179862.7_4	CITED4	Gene	Heart failure (pre-LVAD)	iPSC-CVPC	-5.35349051499187	0.797475522292151	1.90601927841427e-11	3.86388228120141e-07
	ENSG00000179886.6_4	TIGD5	Gene	Heart failure (pre-LVAD)	iPSC-CVPC	-3.63201687394695	0.597085858148972	1.18023888710179e-09	2.39258027193275e-05
	ENSG00000179950.14_6	PUF60	Gene	Heart failure (pre-LVAD)	iPSC-CVPC	-4.37816128362728	0.91821912066473	1.8597077590644e-06	0.0376999956917535
	ENSG00000180019.5_5	AC079741.1	Gene	Heart failure (pre-LVAD)	iPSC-CVPC	-1.23660193188797	0.214349125625472	7.96951416584314e-09	0.000161557991169972
	ENSG00000180211.5_5	FO393411.1	Gene	Heart failure (pre-LVAD)	iPSC-CVPC	-6.41280840170504	0.729568908853854	1.49746760388809e-18	3.03566632660194e-14
	ENSG00000180900.20_6	SCRIB	Gene	Heart failure (pre-LVAD)	iPSC-CVPC	-4.93000663817704	0.888957715680153	2.92566232344854e-08	0.000593090266209488
	ENSG00000181045.15_7	SLC26A11	Gene	Heart failure (pre-LVAD)	iPSC-CVPC	-2.88257142310598	0.60653026197172	2.00857200410855e-06	0.0407177716672885
	ENSG00000181274.7_4	FRAT2	Gene	Heart failure (pre-LVAD)	iPSC-CVPC	-2.58032023426159	0.487099930607307	1.17519895281214e-07	0.00238236331714077
	ENSG00000181284.3_5	TMEM102	Gene	Heart failure (pre-LVAD)	iPSC-CVPC	-2.96767395269268	0.584957695005075	3.90946984734633e-07	0.00792527727454048
	ENSG00000181418.8_5	DDN	Gene	Heart failure (pre-LVAD)	iPSC-CVPC	-2.39609989426518	0.463874790786037	2.39922371253742e-07	0.00486370631005586
	ENSG00000182095.14_7	TNRC18	Gene	Heart failure (pre-LVAD)	iPSC-CVPC	-4.35615944912154	0.790776552249529	3.61470894572634e-08	0.000732773797477644
	ENSG00000182195.9_6	LDOC1	Gene	Heart failure (pre-LVAD)	iPSC-CVPC	-1.1692582547323	0.245908334972989	1.98589781777354e-06	0.0402581205619052
	ENSG00000182199.11_7	SHMT2	Gene	Heart failure (pre-LVAD)	iPSC-CVPC	-3.35370547534051	0.52415703387378	1.57132997419841e-10	3.18540012369502e-06
	ENSG00000182247.10_5	UBE2E2	Gene	Heart failure (pre-LVAD)	iPSC-CVPC	-2.73482279557024	0.57269708787788	1.79404686935025e-06	0.0363689181354683
	ENSG00000182253.15_4	SYNM	Gene	Heart failure (pre-LVAD)	iPSC-CVPC	3.66149149940215	0.535794922865609	8.27199658147159e-12	1.67689914699592e-07
	ENSG00000182263.14_5	FIGN	Gene	Heart failure (pre-LVAD)	iPSC-CVPC	-2.89191929083028	0.48109038806671	1.84181612966814e-09	3.73372965806325e-05
	ENSG00000182326.15_6	C1S	Gene	Heart failure (pre-LVAD)	iPSC-CVPC	2.7083955014501	0.463412147130255	5.08202647997316e-09	0.000103022840802016
	ENSG00000182487.12_2	NCF1B	Gene	Heart failure (pre-LVAD)	iPSC-CVPC	-2.96126821575787	0.608173631172114	1.12098351785953e-06	0.0227245778740484
	ENSG00000182871.16_6	COL18A1	Gene	Heart failure (pre-LVAD)	iPSC-CVPC	-4.17434144449866	0.633144987675648	4.30950705834828e-11	8.73623270868363e-07
	ENSG00000183072.10_7	NKX2-5	Gene	Heart failure (pre-LVAD)	iPSC-CVPC	-3.65626975721001	0.699266869758714	1.70688840566772e-07	0.0034602041759696
	ENSG00000183207.14_5	RUVBL2	Gene	Heart failure (pre-LVAD)	iPSC-CVPC	-3.8857711225939	0.623338224845876	4.55229540503122e-10	9.22841324507929e-06
	ENSG00000183283.16_4	DAZAP2	Gene	Heart failure (pre-LVAD)	iPSC-CVPC	2.71252514206772	0.572777498363036	2.18257565051788e-06	0.0442451735872985
	ENSG00000183298.5_4	RPSAP19	Gene	Heart failure (pre-LVAD)	iPSC-CVPC	-5.95278539621742	0.667321710366168	4.64551690649521e-19	9.41739187284709e-15
	ENSG00000183307.4_8	TMEM121B	Gene	Heart failure (pre-LVAD)	iPSC-CVPC	-2.24969276128867	0.454748195680599	7.53205107899471e-07	0.0152689739473381
	ENSG00000183576.13_5	SETD3	Gene	Heart failure (pre-LVAD)	iPSC-CVPC	3.0427959249642	0.622157695006915	1.00470386811827e-06	0.0203673568144936
	ENSG00000183579.16_5	ZNRF3	Gene	Heart failure (pre-LVAD)	iPSC-CVPC	-2.33562778959308	0.485737656037878	1.52132381696682e-06	0.0308402764175514
	ENSG00000183655.13_5	KLHL25	Gene	Heart failure (pre-LVAD)	iPSC-CVPC	-4.05373691532673	0.550555211473149	1.79825080869626e-13	3.64541403938906e-09
	ENSG00000183684.8_5	ALYREF	Gene	Heart failure (pre-LVAD)	iPSC-CVPC	-4.0052986476089	0.827590310783061	1.30027507545252e-06	0.0263591763295735
	ENSG00000183691.6_5	NOG	Gene	Heart failure (pre-LVAD)	iPSC-CVPC	-2.90395081236896	0.598946963343202	1.24444116319004e-06	0.0252273112601885
	ENSG00000183828.15_6	NUDT14	Gene	Heart failure (pre-LVAD)	iPSC-CVPC	-4.07397868551432	0.706595831430837	8.13475186940591e-09	0.000164907689896597
	ENSG00000183840.7_5	GPR39	Gene	Heart failure (pre-LVAD)	iPSC-CVPC	-3.07080768472549	0.541144676630787	1.38970929497604e-08	0.000281721868277543
	ENSG00000183876.9_6	ARSI	Gene	Heart failure (pre-LVAD)	iPSC-CVPC	-2.47844007098651	0.458491159310455	6.45758771314119e-08	0.00130908218120798
	ENSG00000184471.8_5	C1QTNF8	Gene	Heart failure (pre-LVAD)	iPSC-CVPC	-1.40825633133868	0.277454357440923	3.86209278506561e-07	0.00782923449388501
	ENSG00000184640.18_7	SEPTIN9	Gene	Heart failure (pre-LVAD)	iPSC-CVPC	-3.31097635386957	0.592845522396272	2.33849713306999e-08	0.000474060138815948
	ENSG00000184787.19_5	UBE2G2	Gene	Heart failure (pre-LVAD)	iPSC-CVPC	2.86521551741864	0.561727680358053	3.38364126774621e-07	0.00685931757797512
	ENSG00000184908.18_3	CLCNKB	Gene	Heart failure (pre-LVAD)	iPSC-CVPC	-2.45962303877118	0.474212355938757	2.1399060104386e-07	0.00433801746436113
	ENSG00000185049.16_9	NELFA	Gene	Heart failure (pre-LVAD)	iPSC-CVPC	-4.87848201594342	0.88293764803231	3.28951453757301e-08	0.000666850387056801
	ENSG00000185085.2_5	INTS5	Gene	Heart failure (pre-LVAD)	iPSC-CVPC	-3.03381636806635	0.628569528395273	1.38925061396895e-06	0.0281628884463786
	ENSG00000185105.5_6	MYADML2	Gene	Heart failure (pre-LVAD)	iPSC-CVPC	-2.46631146629278	0.504543326757458	1.01759277883979e-06	0.0206286408126402
	ENSG00000185236.12_4	RAB11B	Gene	Heart failure (pre-LVAD)	iPSC-CVPC	-4.32274698794118	0.843093227822523	2.94010117157222e-07	0.0059601730950112
	ENSG00000185290.4_6	NUPR2	Gene	Heart failure (pre-LVAD)	iPSC-CVPC	-1.33467470395719	0.165028706927163	6.08865771074502e-16	1.23429269112223e-11
	ENSG00000185347.17_10	TEDC1	Gene	Heart failure (pre-LVAD)	iPSC-CVPC	-3.85134377950142	0.812453291280224	2.13309408345605e-06	0.043242083259821
	ENSG00000185532.20_9	PRKG1	Gene	Heart failure (pre-LVAD)	iPSC-CVPC	3.36691088569515	0.699283580027165	1.47347067663336e-06	0.0298701975567115
	ENSG00000185650.10_5	ZFP36L1	Gene	Heart failure (pre-LVAD)	iPSC-CVPC	-3.96668051607634	0.645470070851537	7.97554453096542e-10	1.61680238731731e-05
	ENSG00000185834.10_2	RPL12P4	Gene	Heart failure (pre-LVAD)	iPSC-CVPC	-8.13184588863717	1.16114761190357	2.50032197864887e-12	5.06865271511699e-08
	ENSG00000185862.7_6	EVI2B	Gene	Heart failure (pre-LVAD)	iPSC-CVPC	-1.94861800707683	0.406519557647048	1.63963812813733e-06	0.0332387441336
	ENSG00000185864.16_5	NPIPB4	Gene	Heart failure (pre-LVAD)	iPSC-CVPC	2.95931560260274	0.54906300082715	7.05534105562789e-08	0.00143025873879689
	ENSG00000185883.12_5	ATP6V0C	Gene	Heart failure (pre-LVAD)	iPSC-CVPC	-7.52336954513349	1.24948543833982	1.73156222087704e-09	3.51022293416194e-05
	ENSG00000185924.7_6	RTN4RL1	Gene	Heart failure (pre-LVAD)	iPSC-CVPC	-3.40673723262519	0.600984030180918	1.43970210092042e-08	0.000291856409898588
	ENSG00000186010.19_5	NDUFA13	Gene	Heart failure (pre-LVAD)	iPSC-CVPC	-1.28555012353013	0.248436699831515	2.28451084493191e-07	0.00463116038484597
	ENSG00000186076.5_6	AC012085.1	Gene	Heart failure (pre-LVAD)	iPSC-CVPC	-5.39890774644765	0.544042104716355	3.28370931002324e-23	6.65673551327911e-19
	ENSG00000186160.5_4	CYP4Z1	Gene	Heart failure (pre-LVAD)	iPSC-CVPC	-2.90662855400979	0.425584495437566	8.50727052820379e-12	1.72459388147747e-07
	ENSG00000186314.11_6	PRELID2	Gene	Heart failure (pre-LVAD)	iPSC-CVPC	-3.55642824376637	0.66360152947058	8.35529911492354e-08	0.0016937862365773
	ENSG00000186439.14_8	TRDN	Gene	Heart failure (pre-LVAD)	iPSC-CVPC	1.93148357027591	0.169604560483104	4.79007512902822e-30	9.71044030156601e-26
	ENSG00000186468.13_6	RPS23	Gene	Heart failure (pre-LVAD)	iPSC-CVPC	-3.59164223013269	0.694338725508871	2.30670733002972e-07	0.00467615709943625
	ENSG00000186654.21_7	PRR5	Gene	Heart failure (pre-LVAD)	iPSC-CVPC	-2.60165359248852	0.54034541597898	1.47349459676351e-06	0.0298706824655899
	ENSG00000186765.11_3	FSCN2	Gene	Heart failure (pre-LVAD)	iPSC-CVPC	-2.94661905482844	0.608624622614317	1.28902171583039e-06	0.0261310482233137
	ENSG00000187116.14_6	LILRA5	Gene	Heart failure (pre-LVAD)	iPSC-CVPC	-1.70055369255801	0.340476239293427	5.89479070024628e-07	0.0119499197075393
	ENSG00000187244.12_5	BCAM	Gene	Heart failure (pre-LVAD)	iPSC-CVPC	-4.808134014151	0.868810879503721	3.12732451145765e-08	0.000633971224962695
	ENSG00000187260.16_4	WDR86	Gene	Heart failure (pre-LVAD)	iPSC-CVPC	-3.84441258571835	0.611658496951982	3.27374684151502e-10	6.63653959711925e-06
	ENSG00000187653.11_5	TMSB4XP8	Gene	Heart failure (pre-LVAD)	iPSC-CVPC	-1.00168160766103	0.177499511118656	1.66828845978453e-08	0.00033819543656752
	ENSG00000187840.5_4	EIF4EBP1	Gene	Heart failure (pre-LVAD)	iPSC-CVPC	-3.15928341679609	0.420191935882361	5.5337353535151e-14	1.12179883086458e-09
	ENSG00000188157.15_6	AGRN	Gene	Heart failure (pre-LVAD)	iPSC-CVPC	-2.83292109291491	0.451415377756312	3.4819557327731e-10	7.05862066147763e-06
	ENSG00000188229.6_4	TUBB4B	Gene	Heart failure (pre-LVAD)	iPSC-CVPC	-3.65760547635676	0.514827879463617	1.20740569900888e-12	2.4476528330308e-08
	ENSG00000188483.8_4	IER5L	Gene	Heart failure (pre-LVAD)	iPSC-CVPC	-2.34602161640846	0.453292861915621	2.27289587180265e-07	0.00460761451131833
	ENSG00000188486.3_5	H2AX	Gene	Heart failure (pre-LVAD)	iPSC-CVPC	-4.4075181052185	0.597290078027268	1.59253155217974e-13	3.22837996257877e-09
	ENSG00000189043.10_5	NDUFA4	Gene	Heart failure (pre-LVAD)	iPSC-CVPC	2.05636884910874	0.34867916919186	3.688358420686e-09	7.47704019041466e-05
	ENSG00000189212.12_4	DPY19L2P1	Gene	Heart failure (pre-LVAD)	iPSC-CVPC	1.46095950627638	0.263818826106244	3.06403375975928e-08	0.000621140923778401
	ENSG00000196177.13_4	ACADSB	Gene	Heart failure (pre-LVAD)	iPSC-CVPC	1.99964848601936	0.411248153906488	1.15977437254033e-06	0.0235109460801376
	ENSG00000196199.14_4	MPHOSPH8	Gene	Heart failure (pre-LVAD)	iPSC-CVPC	2.912991211512	0.554422266137625	1.48748323939103e-07	0.0030154260228935
	ENSG00000196230.13_4	TUBB	Gene	Heart failure (pre-LVAD)	iPSC-CVPC	-2.57016808480889	0.452712448123588	1.36866158615673e-08	0.000277455076745692
	ENSG00000196453.8_5	ZNF777	Gene	Heart failure (pre-LVAD)	iPSC-CVPC	-3.73078343518535	0.698871920197251	9.38254831772956e-08	0.00190203019497014
	ENSG00000196456.13_8	ZNF775	Gene	Heart failure (pre-LVAD)	iPSC-CVPC	-4.23896107164917	0.632547195112768	2.06411335136806e-11	4.18437058589333e-07
	ENSG00000196498.13_9	NCOR2	Gene	Heart failure (pre-LVAD)	iPSC-CVPC	-5.47820257336459	1.14810296228077	1.82835817701862e-06	0.0370644769645215
	ENSG00000196517.13_8	SLC6A9	Gene	Heart failure (pre-LVAD)	iPSC-CVPC	-2.24295384598317	0.450128848058048	6.26334279138055e-07	0.0126970485066867
	ENSG00000196531.13_6	NACA	Gene	Heart failure (pre-LVAD)	iPSC-CVPC	3.21665742169943	0.620263199036103	2.1490998927918e-07	0.00435665530266754
	ENSG00000196588.19_9	MRTFA	Gene	Heart failure (pre-LVAD)	iPSC-CVPC	-6.01146951285084	0.872413698926121	5.55505363059374e-12	1.12612047199396e-07
	ENSG00000196683.10_4	TOMM7	Gene	Heart failure (pre-LVAD)	iPSC-CVPC	5.2276484434292	0.859228539560199	1.17133788841345e-09	2.37453616739175e-05
	ENSG00000196961.12_2	AP2A1	Gene	Heart failure (pre-LVAD)	iPSC-CVPC	-6.53113065582421	0.91958089902365	1.22705984950642e-12	2.48749572691942e-08
	ENSG00000196976.7_5	LAGE3	Gene	Heart failure (pre-LVAD)	iPSC-CVPC	-4.5717351210507	0.697645818051632	5.63589116274181e-11	1.14250785651102e-06
	ENSG00000197136.4_4	PCNX3	Gene	Heart failure (pre-LVAD)	iPSC-CVPC	-4.30819817696876	0.843355035063192	3.24891519465657e-07	0.0065862008826078
	ENSG00000197157.11_7	SND1	Gene	Heart failure (pre-LVAD)	iPSC-CVPC	-2.50970616892074	0.411516944521229	1.06954408994113e-09	2.16817977912866e-05
	ENSG00000197358.9_5	BNIP3P1	Gene	Heart failure (pre-LVAD)	iPSC-CVPC	-2.72875264094005	0.516065692421979	1.23926775964612e-07	0.00251224360235461
	ENSG00000197893.14_5	NRAP	Gene	Heart failure (pre-LVAD)	iPSC-CVPC	1.45669190830248	0.231622632382568	3.19364922572779e-10	6.47416571039538e-06
	ENSG00000197971.16_9	MBP	Gene	Heart failure (pre-LVAD)	iPSC-CVPC	2.08156908084646	0.435587423963761	1.76376913280547e-06	0.0357551278602325
	ENSG00000198113.3_4	TOR4A	Gene	Heart failure (pre-LVAD)	iPSC-CVPC	-4.55042179827836	0.71502739307664	1.96588581155208e-10	3.98524371717838e-06
	ENSG00000198168.9_5	SVIP	Gene	Heart failure (pre-LVAD)	iPSC-CVPC	3.43051699608956	0.697405372694922	8.70002339087598e-07	0.0176366874179838
	ENSG00000198467.16_8	TPM2	Gene	Heart failure (pre-LVAD)	iPSC-CVPC	2.98001691748465	0.588368272853371	4.08649599081731e-07	0.00828414467258485
	ENSG00000198618.5_4	PPIAP22	Gene	Heart failure (pre-LVAD)	iPSC-CVPC	-7.91347493111035	0.874327163193248	1.41754348882448e-19	2.87364416054499e-15
	ENSG00000198626.17_7	RYR2	Gene	Heart failure (pre-LVAD)	iPSC-CVPC	1.70132006408854	0.331605831395466	2.88897890312912e-07	0.00585653803242335
	ENSG00000198668.13_6	CALM1	Gene	Heart failure (pre-LVAD)	iPSC-CVPC	2.17678466371523	0.452090572049143	1.47251163210853e-06	0.0298507558061041
	ENSG00000198680.4_2	TUSC1	Gene	Heart failure (pre-LVAD)	iPSC-CVPC	-3.52696976522848	0.741559851754519	1.97320040732056e-06	0.0400007186572024
	ENSG00000198744.5_5	MTCO3P12	Gene	Heart failure (pre-LVAD)	iPSC-CVPC	2.63504108218962	0.466851785463474	1.65876233450375e-08	0.0003362643004506
	ENSG00000198816.7_5	ZNF358	Gene	Heart failure (pre-LVAD)	iPSC-CVPC	-4.80850445676277	0.874355135378717	3.80898388850233e-08	0.000772157213877192
	ENSG00000198840.2_1	MT-ND3	Gene	Heart failure (pre-LVAD)	iPSC-CVPC	3.30162927310796	0.669107499133658	8.0406616570981e-07	0.0163000293112693
	ENSG00000198933.9_6	TBKBP1	Gene	Heart failure (pre-LVAD)	iPSC-CVPC	-3.26702924483763	0.591871763966434	3.39335199589428e-08	0.000687900316607689
	ENSG00000200278.1_1	RNA5SP352	Gene	Heart failure (pre-LVAD)	iPSC-CVPC	-2.18928634793092	0.331610993297445	4.05725350691867e-11	8.22486430922553e-07
	ENSG00000200693.1	U3	Gene	Heart failure (pre-LVAD)	iPSC-CVPC	-1.04883645879914	0.0999533370816582	9.27701337536655e-26	1.88063615145431e-21
	ENSG00000202000.1	RNU1-36P	Gene	Heart failure (pre-LVAD)	iPSC-CVPC	-1.41990126250232	0.140802541211691	6.4796538373163e-24	1.31355542590076e-19
	ENSG00000203394.2	RP5-930J4.4	Gene	Heart failure (pre-LVAD)	iPSC-CVPC	-1.21100779556535	0.200389846911275	1.51031677098729e-09	3.06171415814543e-05
	ENSG00000203667.10_4	COX20	Gene	Heart failure (pre-LVAD)	iPSC-CVPC	3.19270866478326	0.444220926105885	6.6129116239633e-13	1.34056944440984e-08
	ENSG00000203950.6_7	RTL8A	Gene	Heart failure (pre-LVAD)	iPSC-CVPC	-5.61573294916822	0.775653537977783	4.48679050858446e-13	9.09562171900242e-09
	ENSG00000204071.10_4	TCEAL6	Gene	Heart failure (pre-LVAD)	iPSC-CVPC	-1.58724307564658	0.274134895637695	7.03833213434826e-09	0.000142681069027508
	ENSG00000204253.4_4	HNRNPCP2	Gene	Heart failure (pre-LVAD)	iPSC-CVPC	-6.978096782483	0.94430264408803	1.47179760595689e-13	2.98362810679581e-09
	ENSG00000204316.13_5	MRPL38	Gene	Heart failure (pre-LVAD)	iPSC-CVPC	-5.2490799332511	0.931123252880107	1.72673706400755e-08	0.000350044137615611
	ENSG00000204435.14_5	CSNK2B	Gene	Heart failure (pre-LVAD)	iPSC-CVPC	-4.25882637882906	0.831230658456294	2.99884824268157e-07	0.00607926515756408
	ENSG00000204463.12_7	BAG6	Gene	Heart failure (pre-LVAD)	iPSC-CVPC	-4.8456885142391	0.7898718122591	8.52779934933861e-10	1.72875548409792e-05
	ENSG00000204469.13_4	PRRC2A	Gene	Heart failure (pre-LVAD)	iPSC-CVPC	-5.91023962840484	1.07915036356067	4.33202058532724e-08	0.000878187213057538
	ENSG00000204628.12_8	RACK1	Gene	Heart failure (pre-LVAD)	iPSC-CVPC	-4.29100846313622	0.584577623308621	2.13024830955046e-13	4.31843937312069e-09
	ENSG00000204677.13_10	FAM153CP	Gene	Heart failure (pre-LVAD)	iPSC-CVPC	-5.36220622046892	0.699566716053714	1.78776752805489e-14	3.62416233287287e-10
	ENSG00000205362.11_4	MT1A	Gene	Heart failure (pre-LVAD)	iPSC-CVPC	-2.49508101676604	0.526815225671259	2.17806029920399e-06	0.0441536383854633
	ENSG00000205531.13_7	NAP1L4	Gene	Heart failure (pre-LVAD)	iPSC-CVPC	2.28383836535308	0.419262290212068	5.11464117637232e-08	0.0010368400592742
	ENSG00000206573.9_10	THUMPD3-AS1	Gene	Heart failure (pre-LVAD)	iPSC-CVPC	3.83156705357696	0.799893882609877	1.66703028138715e-06	0.0337940378642803
	ENSG00000206588.1	RNU1-28P	Gene	Heart failure (pre-LVAD)	iPSC-CVPC	12.3784119333056	1.27791741881889	3.44475844999171e-22	6.98321432982319e-18
	ENSG00000206596.1	RNU1-27P	Gene	Heart failure (pre-LVAD)	iPSC-CVPC	11.8467591887459	1.28796328067719	3.64481695346115e-20	7.38877292805644e-16
	ENSG00000206652.1	RNU1-1	Gene	Heart failure (pre-LVAD)	iPSC-CVPC	12.3784119333056	1.27791741881889	3.44475844999171e-22	6.98321432982319e-18
	ENSG00000206737.1	RNVU1-18	Gene	Heart failure (pre-LVAD)	iPSC-CVPC	12.3784119333056	1.22644502772629	5.93762797778524e-24	1.20367594365662e-19
	ENSG00000207005.1	RNU1-2	Gene	Heart failure (pre-LVAD)	iPSC-CVPC	11.8467591887459	1.2550313759064	3.7487440555419e-21	7.59945394939454e-17
	ENSG00000207389.1	RNU1-4	Gene	Heart failure (pre-LVAD)	iPSC-CVPC	11.8467591887459	1.2550313759064	3.7487440555419e-21	7.59945394939454e-17
	ENSG00000207513.1	RNU1-3	Gene	Heart failure (pre-LVAD)	iPSC-CVPC	12.3044727134334	1.24527833704884	5.03775826260592e-23	1.02125435499547e-18
	ENSG00000207765.1	AL132780.1	Gene	Heart failure (pre-LVAD)	iPSC-CVPC	-1.35313329121634	0.124452100003134	1.55488545383462e-27	3.15206379201354e-23
	ENSG00000210825.1	SNORA40	Gene	Heart failure (pre-LVAD)	iPSC-CVPC	-1.33787236777874	0.132099916733708	4.16196670804175e-24	8.43713891054224e-20
	ENSG00000211517.1	MIR671	Gene	Heart failure (pre-LVAD)	iPSC-CVPC	-1.44111615287698	0.144234451597254	1.66077271483035e-23	3.36671844750409e-19
	ENSG00000211637.2_3	IGLV4-69	Gene	Heart failure (pre-LVAD)	iPSC-CVPC	-1.39801012688246	0.267888525594437	1.80254962021991e-07	0.0036541285901098
	ENSG00000211638.2_4	IGLV8-61	Gene	Heart failure (pre-LVAD)	iPSC-CVPC	-1.44541031907911	0.262319809407118	3.58614850120637e-08	0.000726984024164555
	ENSG00000211642.3_5	IGLV10-54	Gene	Heart failure (pre-LVAD)	iPSC-CVPC	-1.42489546470664	0.148956405651872	1.11277217103994e-21	2.25581174513217e-17
	ENSG00000211644.3_5	IGLV1-51	Gene	Heart failure (pre-LVAD)	iPSC-CVPC	-1.79221658534622	0.317786272859459	1.70354963202071e-08	0.000345343581403238
	ENSG00000211649.3_4	IGLV7-46	Gene	Heart failure (pre-LVAD)	iPSC-CVPC	-1.33408703181695	0.268676590369202	6.85592319953773e-07	0.0138983275101029
	ENSG00000211650.2_3	IGLV5-45	Gene	Heart failure (pre-LVAD)	iPSC-CVPC	-1.54368816767626	0.233926091975086	4.138223397596e-11	8.38900647160661e-07
	ENSG00000211652.2_3	IGLV7-43	Gene	Heart failure (pre-LVAD)	iPSC-CVPC	-1.4606458287984	0.254377305250679	9.35401828221215e-09	0.000189624658617005
	ENSG00000211660.3_4	IGLV2-23	Gene	Heart failure (pre-LVAD)	iPSC-CVPC	-1.63821050186678	0.338390465416748	1.29067802514811e-06	0.0261646249258025
	ENSG00000211662.2_3	IGLV3-21	Gene	Heart failure (pre-LVAD)	iPSC-CVPC	-2.09085076140959	0.301116756959034	3.8208397468545e-12	7.74560633482344e-08
	ENSG00000211664.3_4	IGLV2-18	Gene	Heart failure (pre-LVAD)	iPSC-CVPC	-1.42579639574391	0.217686596679278	5.76270853375786e-11	1.16821627396339e-06
	ENSG00000211669.3_4	IGLV3-10	Gene	Heart failure (pre-LVAD)	iPSC-CVPC	-1.38429204455807	0.246076886848398	1.85030129278086e-08	0.000375093078072536
	ENSG00000211892.4_8	IGHG4	Gene	Heart failure (pre-LVAD)	iPSC-CVPC	-2.09018892829275	0.354863384489404	3.85908639124464e-09	7.82313993233113e-05
	ENSG00000211893.4_9	IGHG2	Gene	Heart failure (pre-LVAD)	iPSC-CVPC	-2.11753264210314	0.368253116509451	8.91328266482169e-09	0.000180690066181265
	ENSG00000211896.7_7	IGHG1	Gene	Heart failure (pre-LVAD)	iPSC-CVPC	-1.97704484819283	0.405449282869583	1.08158346570529e-06	0.0219258600167776
	ENSG00000211897.9_8	IGHG3	Gene	Heart failure (pre-LVAD)	iPSC-CVPC	-2.1090647021337	0.355698765156032	3.04124591098884e-09	6.16521371075658e-05
	ENSG00000211898.7_4	IGHD	Gene	Heart failure (pre-LVAD)	iPSC-CVPC	-1.97348183213208	0.325161138062634	1.28514885505434e-09	2.60525375896616e-05
	ENSG00000211899.10_6	IGHM	Gene	Heart failure (pre-LVAD)	iPSC-CVPC	-2.4485417613857	0.452250596412063	6.15887502713421e-08	0.00124852714550065
	ENSG00000211933.2_4	IGHV6-1	Gene	Heart failure (pre-LVAD)	iPSC-CVPC	-1.42159721751569	0.230505008141673	6.94588772388828e-10	1.40807035938663e-05
	ENSG00000211934.3_4	IGHV1-2	Gene	Heart failure (pre-LVAD)	iPSC-CVPC	-1.60484993457275	0.238436177972139	1.68812030093332e-11	3.42215747405203e-07
	ENSG00000211936.2	IGHV4-4	Gene	Heart failure (pre-LVAD)	iPSC-CVPC	-1.50192565732666	0.285029752980113	1.3689689391827e-07	0.00277517383351117
	ENSG00000211938.2_5	IGHV3-7	Gene	Heart failure (pre-LVAD)	iPSC-CVPC	-1.67726621902224	0.330736667894011	3.95098844538511e-07	0.0080094437764847
	ENSG00000211939.2	IGHV1-8	Gene	Heart failure (pre-LVAD)	iPSC-CVPC	-1.56828611075973	0.270303563101029	6.55504926879839e-09	0.000132883958777081
	ENSG00000211941.3_6	IGHV3-11	Gene	Heart failure (pre-LVAD)	iPSC-CVPC	-1.3392299360728	0.269975872374702	7.02923597113189e-07	0.0142496671606786
	ENSG00000211943.2_6	IGHV3-15	Gene	Heart failure (pre-LVAD)	iPSC-CVPC	-1.40162132530354	0.263118157241735	9.98671666001565e-08	0.00202450720131837
	ENSG00000211950.2_4	IGHV1-24	Gene	Heart failure (pre-LVAD)	iPSC-CVPC	-1.56438525043167	0.255747823253142	9.54099436930871e-10	1.93415037854626e-05
	ENSG00000211951.2_4	IGHV2-26	Gene	Heart failure (pre-LVAD)	iPSC-CVPC	-1.81095408637729	0.277409796322857	6.66169233886001e-11	1.3504582709337e-06
	ENSG00000211962.2_5	IGHV1-46	Gene	Heart failure (pre-LVAD)	iPSC-CVPC	-1.55237801985235	0.305534684219061	3.75736016629492e-07	0.00761692052911306
	ENSG00000211964.3_4	IGHV3-48	Gene	Heart failure (pre-LVAD)	iPSC-CVPC	-1.69496286509838	0.263762530754871	1.30924300898749e-10	2.65409742781944e-06
	ENSG00000211965.4_5	IGHV3-49	Gene	Heart failure (pre-LVAD)	iPSC-CVPC	-1.64871280198589	0.193150424335268	1.39068014162644e-17	2.81918678310512e-13
	ENSG00000211967.3_5	IGHV3-53	Gene	Heart failure (pre-LVAD)	iPSC-CVPC	-1.82398312208945	0.225774553562001	6.54175083717373e-16	1.32614372971186e-11
	ENSG00000211970.3_5	IGHV4-61	Gene	Heart failure (pre-LVAD)	iPSC-CVPC	-1.63689486157253	0.295295646216876	2.96924153592668e-08	0.000601924644163057
	ENSG00000211976.2_6	IGHV3-73	Gene	Heart failure (pre-LVAD)	iPSC-CVPC	-1.98076520393709	0.277368399539189	9.24662630920502e-13	1.87447608540204e-08
	ENSG00000212789.4_3	ST13P5	Gene	Heart failure (pre-LVAD)	iPSC-CVPC	-4.36036932720428	0.856062512234778	3.51480720682666e-07	0.00712521716967901
	ENSG00000212864.3_5	RNF208	Gene	Heart failure (pre-LVAD)	iPSC-CVPC	-4.15978655700149	0.724550104280617	9.40083670187307e-09	0.000190573761620371
	ENSG00000213080.3_5	AL354714.2	Gene	Heart failure (pre-LVAD)	iPSC-CVPC	-4.79548140432911	0.635389873282739	4.44355863742881e-14	9.00798206979568e-10
	ENSG00000213300.5_4	HNRNPA3P6	Gene	Heart failure (pre-LVAD)	iPSC-CVPC	-3.57740446233896	0.735794999082508	1.16230223894505e-06	0.0235621909878941
	ENSG00000213315.5_5	AL122020.1	Gene	Heart failure (pre-LVAD)	iPSC-CVPC	-6.69987719342236	1.05213742399557	1.91667870168768e-10	3.88549106406127e-06
	ENSG00000213380.15_9	COG8	Gene	Heart failure (pre-LVAD)	iPSC-CVPC	-4.51357074822119	0.683620100727636	4.04404867026119e-11	8.19809546435348e-07
	ENSG00000213553.4_4	RPLP0P6	Gene	Heart failure (pre-LVAD)	iPSC-CVPC	-8.63422534364067	0.581400823189358	6.88175009747443e-50	1.39506837976002e-45
	ENSG00000213609.3_4	RPL7AP50	Gene	Heart failure (pre-LVAD)	iPSC-CVPC	-5.77610783936813	0.728242726357182	2.16393338501046e-15	4.38672575809321e-11
	ENSG00000213626.13_5	LBH	Gene	Heart failure (pre-LVAD)	iPSC-CVPC	-2.54156320852519	0.462410707063342	3.87770058720858e-08	0.000786087463038923
	ENSG00000213638.6_7	ADAT3	Gene	Heart failure (pre-LVAD)	iPSC-CVPC	-5.5071259190445	0.979678948591659	1.89462391040528e-08	0.000384078159117358
	ENSG00000213740.2_4	SERBP1P1	Gene	Heart failure (pre-LVAD)	iPSC-CVPC	-5.43089780158911	0.64565662940975	4.0502979322855e-17	8.21076396832916e-13
	ENSG00000213866.3_4	YBX1P10	Gene	Heart failure (pre-LVAD)	iPSC-CVPC	-1.66561695292922	0.312619110855367	9.93310224166349e-08	0.00201363848643002
	ENSG00000213937.4_5	CLDN9	Gene	Heart failure (pre-LVAD)	iPSC-CVPC	-2.83971394867585	0.546952760057359	2.08179427634407e-07	0.0042202133570047
	ENSG00000213942.3_7	AC005840.1	Gene	Heart failure (pre-LVAD)	iPSC-CVPC	-5.26168303255223	1.11075482205096	2.1686910568842e-06	0.0439637051051565
	ENSG00000214097.5_5	SMCO1	Gene	Heart failure (pre-LVAD)	iPSC-CVPC	0.908046333665021	0.160446321506869	1.51812570480509e-08	0.000307754442878088
	ENSG00000214114.9_6	MYCBP	Gene	Heart failure (pre-LVAD)	iPSC-CVPC	3.6677656156102	0.773862779874105	2.14187535057578e-06	0.0434200971068722
	ENSG00000214160.10_5	ALG3	Gene	Heart failure (pre-LVAD)	iPSC-CVPC	-3.96611415532753	0.824514656190279	1.50748468934287e-06	0.0305597296223587
	ENSG00000214182.5_3	PTMAP5	Gene	Heart failure (pre-LVAD)	iPSC-CVPC	-4.02310759928571	0.816613177728437	8.3682696346821e-07	0.0169641562034276
	ENSG00000214391.3_4	TUBAP2	Gene	Heart failure (pre-LVAD)	iPSC-CVPC	-3.19589174627829	0.6681362679719	1.72446196871344e-06	0.0349582930297589
	ENSG00000214784.4_3	RPS3AP21	Gene	Heart failure (pre-LVAD)	iPSC-CVPC	10.9729203393102	1.22148764568562	2.62901066119668e-19	5.32953041237791e-15
	ENSG00000215012.9_9	RTL10	Gene	Heart failure (pre-LVAD)	iPSC-CVPC	-2.71065543125201	0.563585054160113	1.51183292138747e-06	0.0306478769823668
	ENSG00000216866.5_5	RPS2P55	Gene	Heart failure (pre-LVAD)	iPSC-CVPC	-4.80422916297785	0.618115910818783	7.70275027325443e-15	1.56150153539414e-10
	ENSG00000217027.1_4	TPT1P4	Gene	Heart failure (pre-LVAD)	iPSC-CVPC	-5.06445924562834	0.826682758153036	8.99785011592019e-10	1.82404417549934e-05
	ENSG00000218426.5_6	AL590867.2	Gene	Heart failure (pre-LVAD)	iPSC-CVPC	-9.93967733568331	0.902177241933476	3.14911688389903e-28	6.38388974704011e-24
	ENSG00000218739.10_5	CEBPZOS	Gene	Heart failure (pre-LVAD)	iPSC-CVPC	4.58805350593633	0.941209664281458	1.09009856682848e-06	0.0220984781467469
	ENSG00000219073.8_5	CELA3B	Gene	Heart failure (pre-LVAD)	iPSC-CVPC	-1.17232163000629	0.190439154596671	7.4659152037694e-10	1.51349033010813e-05
	ENSG00000221983.8_6	UBA52	Gene	Heart failure (pre-LVAD)	iPSC-CVPC	-3.24561600298601	0.567246532564004	1.05461750501403e-08	0.000213792060616444
	ENSG00000222328.1	RNU2-2P	Gene	Heart failure (pre-LVAD)	iPSC-CVPC	6.28614724280462	1.30531554046946	1.46606439819134e-06	0.0297200574801348
	ENSG00000222414.1	RNU2-59P	Gene	Heart failure (pre-LVAD)	iPSC-CVPC	4.58914613721144	0.715917740437067	1.453684954156e-10	2.94691013906504e-06
	ENSG00000223001.1	RNU2-61P	Gene	Heart failure (pre-LVAD)	iPSC-CVPC	-1.20985211624813	0.23240683276802	1.93213522714103e-07	0.0039168245324603
	ENSG00000223485.4_8	LINC01615	Gene	Heart failure (pre-LVAD)	iPSC-CVPC	-2.24388768498184	0.293553570751836	2.10775109124045e-14	4.27283301216264e-10
	ENSG00000223534.1_7	HLA-DQB1-AS1	Gene	Heart failure (pre-LVAD)	iPSC-CVPC	-1.07610973419393	0.194525548320476	3.1665187490202e-08	0.000641916680801375
	ENSG00000223803.1_4	RPS20P14	Gene	Heart failure (pre-LVAD)	iPSC-CVPC	-4.97506569238785	0.747208868670493	2.77202407016493e-11	5.61944719503835e-07
	ENSG00000224365.1_5	AC073261.1	Gene	Heart failure (pre-LVAD)	iPSC-CVPC	-1.43136913447528	0.133447734049168	7.67968242346047e-27	1.55682522088391e-22
	ENSG00000224373.3_4	IGHV4-59	Gene	Heart failure (pre-LVAD)	iPSC-CVPC	-1.68500308230869	0.294810734195532	1.09355017790157e-08	0.000221684492064206
	ENSG00000224397.7_8	SMIM25	Gene	Heart failure (pre-LVAD)	iPSC-CVPC	-1.85037068583742	0.326117308002505	1.39548408787293e-08	0.0002828925342936
	ENSG00000224520.2_5	KRT8P45	Gene	Heart failure (pre-LVAD)	iPSC-CVPC	-2.17715837528595	0.447539762487567	1.14615402296693e-06	0.0232348343535856
	ENSG00000224546.2_5	EIF4BP3	Gene	Heart failure (pre-LVAD)	iPSC-CVPC	-5.1053247348928	0.695109206316325	2.06318404053603e-13	4.18248668697464e-09
	ENSG00000224578.5_5	HNRNPA1P48	Gene	Heart failure (pre-LVAD)	iPSC-CVPC	-5.43683030475076	1.10930539534861	9.52955657383848e-07	0.0193183170864854
	ENSG00000224615.1	RP11-34H11.1	Gene	Heart failure (pre-LVAD)	iPSC-CVPC	-1.19525797203427	0.223294957196781	8.65934230064519e-08	0.00175542187118679
	ENSG00000224631.4_5	RPS27AP16	Gene	Heart failure (pre-LVAD)	iPSC-CVPC	-4.11557636535616	0.81869528752059	4.98227722682089e-07	0.0101000723942113
	ENSG00000224650.2_4	IGHV3-74	Gene	Heart failure (pre-LVAD)	iPSC-CVPC	-2.12524590471654	0.292378058175043	3.62618942521446e-13	7.35101120279475e-09
	ENSG00000224713.4_8	AC025165.1	Gene	Heart failure (pre-LVAD)	iPSC-CVPC	-1.95994872547665	0.38242050709861	2.97357645731258e-07	0.00602803419426406
	ENSG00000224743.7_8	TEX26-AS1	Gene	Heart failure (pre-LVAD)	iPSC-CVPC	-1.79008148454645	0.348864836408297	2.87961161796077e-07	0.00583754867193007
	ENSG00000224861.1_5	YBX1P1	Gene	Heart failure (pre-LVAD)	iPSC-CVPC	-10.2027918035263	0.900504437312173	9.31143517911808e-30	1.88761413951082e-25
	ENSG00000225028.1_6	AC096541.1	Gene	Heart failure (pre-LVAD)	iPSC-CVPC	-1.93444016508836	0.255345169975556	3.56961940541619e-14	7.2363324586597e-10
	ENSG00000225285.1_7	LINC01770	Gene	Heart failure (pre-LVAD)	iPSC-CVPC	-5.07792725215151	0.926270911732725	4.20261664450938e-08	0.000851954446174941
	ENSG00000225484.7_10	NUTM2B-AS1	Gene	Heart failure (pre-LVAD)	iPSC-CVPC	4.33714311909241	0.915888729627463	2.18572135450291e-06	0.044308943298483
	ENSG00000225519.1_6	AL365434.1	Gene	Heart failure (pre-LVAD)	iPSC-CVPC	-1.43666619144481	0.205389768895165	2.65583763727246e-12	5.38391405827873e-08
	ENSG00000225698.3_6	IGHV3-72	Gene	Heart failure (pre-LVAD)	iPSC-CVPC	-1.68632720677553	0.279043043093152	1.5103920844952e-09	3.06186683368867e-05
	ENSG00000225920.2_5	RIMKLBP2	Gene	Heart failure (pre-LVAD)	iPSC-CVPC	-1.64133859751314	0.297015635358207	3.27424441243338e-08	0.000663754827288495
	ENSG00000226005.5_8	LINC02660	Gene	Heart failure (pre-LVAD)	iPSC-CVPC	2.33788682608598	0.495777261649241	2.41000514203508e-06	0.0488556242393351
	ENSG00000226306.6_3	NPY6R	Gene	Heart failure (pre-LVAD)	iPSC-CVPC	1.5495490320275	0.242805501014291	1.74957791817024e-10	3.54674435571471e-06
	ENSG00000226415.1_4	TPI1P1	Gene	Heart failure (pre-LVAD)	iPSC-CVPC	-9.62907913665574	0.752037618364397	1.55746957718713e-37	3.15730232687375e-33
	ENSG00000226608.3_5	FTLP3	Gene	Heart failure (pre-LVAD)	iPSC-CVPC	-3.33103482086	0.434106139946931	1.67602188536551e-14	3.39763156601296e-10
	ENSG00000226715.4_6	LINC01709	Gene	Heart failure (pre-LVAD)	iPSC-CVPC	-1.34762433792271	0.214179743076346	3.13350623734695e-10	6.35224384434974e-06
	ENSG00000226890.1_7	Z97652.1	Gene	Heart failure (pre-LVAD)	iPSC-CVPC	-1.79169249897697	0.367063651988022	1.05469336293146e-06	0.0213807438533466
	ENSG00000227028.6_9	SLC8A1-AS1	Gene	Heart failure (pre-LVAD)	iPSC-CVPC	3.28563797747178	0.619255341414126	1.12186869220724e-07	0.00227425221284252
	ENSG00000227260.2_7	LINC01985	Gene	Heart failure (pre-LVAD)	iPSC-CVPC	-2.85221700673164	0.419185586113916	1.01621652780973e-11	2.06007414517588e-07
	ENSG00000227329.2_6	AL139396.1	Gene	Heart failure (pre-LVAD)	iPSC-CVPC	-1.17682083103615	0.112885707606593	1.90884583271739e-25	3.86961227208469e-21
	ENSG00000227500.10_5	SCAMP4	Gene	Heart failure (pre-LVAD)	iPSC-CVPC	-3.51060248706774	0.593383400167277	3.29371399882452e-09	6.67701701841707e-05
	ENSG00000227627.3_8	AL080276.2	Gene	Heart failure (pre-LVAD)	iPSC-CVPC	1.50728641493307	0.308066119162755	9.94433937454955e-07	0.0201591647800869
	ENSG00000227751.1_7	RCC2-AS1	Gene	Heart failure (pre-LVAD)	iPSC-CVPC	-1.57542787712777	0.267801834256791	4.03353704425169e-09	8.17678629610703e-05
	ENSG00000228232.1_4	GAPDHP1	Gene	Heart failure (pre-LVAD)	iPSC-CVPC	-8.3466611576316	0.659088909084453	9.36794084103317e-37	1.89906896729424e-32
	ENSG00000228290.7_9	TBX18-AS1	Gene	Heart failure (pre-LVAD)	iPSC-CVPC	-2.03895322507423	0.251418955764886	5.0710155880941e-16	1.02799628001844e-11
	ENSG00000228499.1_4	TMSB10P1	Gene	Heart failure (pre-LVAD)	iPSC-CVPC	-1.20560894029973	0.110430641307592	9.52436581792754e-28	1.93077943861027e-23
	ENSG00000228522.2_6	AL845321.1	Gene	Heart failure (pre-LVAD)	iPSC-CVPC	-1.69970328557989	0.340213809736233	5.85360364176581e-07	0.0118664253025877
	ENSG00000228643.1_6	AC079779.2	Gene	Heart failure (pre-LVAD)	iPSC-CVPC	-1.72796687240328	0.321584623590986	7.73135949604094e-08	0.00156730119703742
	ENSG00000228797.2_4	FAM207BP	Gene	Heart failure (pre-LVAD)	iPSC-CVPC	-6.12604918167009	0.961881656926755	1.90490520918399e-10	3.86162384005779e-06
	ENSG00000229119.3_5	AC026403.1	Gene	Heart failure (pre-LVAD)	iPSC-CVPC	-7.46252770293712	0.648329792896716	1.16950542361226e-30	2.37082139474677e-26
	ENSG00000229212.8_7	AC044860.1	Gene	Heart failure (pre-LVAD)	iPSC-CVPC	-3.94696700539373	0.766443096266184	2.6087622520116e-07	0.00528848283727792
	ENSG00000229230.3_3	MT1P3	Gene	Heart failure (pre-LVAD)	iPSC-CVPC	-1.03500363321575	0.153195069401541	1.41740121278082e-11	2.87335573854928e-07
	ENSG00000229344.1_4	MTCO2P12	Gene	Heart failure (pre-LVAD)	iPSC-CVPC	4.60587247493369	0.843964921377093	4.83098074370672e-08	0.000979336416364226
	ENSG00000229413.2_5	AC018638.1	Gene	Heart failure (pre-LVAD)	iPSC-CVPC	-1.31613027443345	0.257558884343051	3.22129845746855e-07	0.00653021623298024
	ENSG00000229604.2_5	MTATP8P2	Gene	Heart failure (pre-LVAD)	iPSC-CVPC	-0.947865459733201	0.147128291947715	1.17566444647567e-10	2.38330696589548e-06
	ENSG00000229638.1_4	RPL4P4	Gene	Heart failure (pre-LVAD)	iPSC-CVPC	-8.04655543947873	0.786099779607231	1.36706313838991e-24	2.77131039414403e-20
	ENSG00000229732.1_6	AC019349.1	Gene	Heart failure (pre-LVAD)	iPSC-CVPC	-1.2590607696376	0.121615689945182	4.06497459942086e-25	8.24051650794597e-21
	ENSG00000229932.3_5	YWHAZP3	Gene	Heart failure (pre-LVAD)	iPSC-CVPC	-3.62761949928701	0.677933792118023	8.7472532879638e-08	0.00177324318653602
	ENSG00000230216.1_4	HSPB1P2	Gene	Heart failure (pre-LVAD)	iPSC-CVPC	-4.6331870171489	0.631769615198869	2.23941666507074e-13	4.5397454634314e-09
	ENSG00000230373.8_6	GOLGA6L5P	Gene	Heart failure (pre-LVAD)	iPSC-CVPC	3.33967249358912	0.649674768235745	2.73964895578322e-07	0.00555381636316374
	ENSG00000230500.1_6	MKX-AS1	Gene	Heart failure (pre-LVAD)	iPSC-CVPC	-1.44160464095436	0.185930355994716	8.94179387083381e-15	1.81268045349543e-10
	ENSG00000230521.1_5	AL645929.1	Gene	Heart failure (pre-LVAD)	iPSC-CVPC	-2.24405179565454	0.471301067506414	1.92256796218339e-06	0.0389742977293817
	ENSG00000230778.1_4	ANKRD63	Gene	Heart failure (pre-LVAD)	iPSC-CVPC	-2.80028720027408	0.451673272441465	5.65323753799612e-10	1.14602431370257e-05
	ENSG00000230897.1_4	RPS18P12	Gene	Heart failure (pre-LVAD)	iPSC-CVPC	-6.5038141927168	0.978983484044315	3.06453429107158e-11	6.21242391486031e-07
	ENSG00000230955.1_6	AL929472.2	Gene	Heart failure (pre-LVAD)	iPSC-CVPC	-1.44021436506026	0.230151277912225	3.90732218824058e-10	7.9209235400013e-06
	ENSG00000231043.3_2	AC007238.1	Gene	Heart failure (pre-LVAD)	iPSC-CVPC	-1.98185512417095	0.390581795538464	3.89313131336464e-07	0.0078921557984528
	ENSG00000231890.8_7	DARS-AS1	Gene	Heart failure (pre-LVAD)	iPSC-CVPC	-3.64035803402033	0.665735266558031	4.54688638181895e-08	0.000921744807322337
	ENSG00000232032.1_5	AC079781.2	Gene	Heart failure (pre-LVAD)	iPSC-CVPC	-1.3264837178161	0.127366740326303	2.125132424429e-25	4.30806845080247e-21
	ENSG00000232098.3_7	AC012313.1	Gene	Heart failure (pre-LVAD)	iPSC-CVPC	-4.85103045195655	0.867541373994036	2.24858056546403e-08	0.000455832252230868
	ENSG00000232149.1_5	FERP1	Gene	Heart failure (pre-LVAD)	iPSC-CVPC	-1.22170762911862	0.237234135964969	2.6076861477927e-07	0.00528630135880536
	ENSG00000232216.1_4	IGHV3-43	Gene	Heart failure (pre-LVAD)	iPSC-CVPC	-1.6016049340871	0.199643411152798	1.03759602872356e-15	2.1034146694284e-11
	ENSG00000232415.1_7	ELN-AS1	Gene	Heart failure (pre-LVAD)	iPSC-CVPC	-2.28840970141992	0.356435561464377	1.36039977156959e-10	2.75780241692587e-06
	ENSG00000232675.7_8	AL121830.1	Gene	Heart failure (pre-LVAD)	iPSC-CVPC	-1.21886964651888	0.116228215267656	9.92671644115246e-26	2.01234395695043e-21
	ENSG00000232699.3_3	BDH2P1	Gene	Heart failure (pre-LVAD)	iPSC-CVPC	-5.06376521110609	1.05547938563689	1.60580088618013e-06	0.0325527955646436
	ENSG00000233090.1_5	AC015922.1	Gene	Heart failure (pre-LVAD)	iPSC-CVPC	-1.37858571965293	0.130159080729537	3.261645773704e-26	6.61200831245275e-22
	ENSG00000233111.1_3	RAB1C	Gene	Heart failure (pre-LVAD)	iPSC-CVPC	-4.86785713964509	0.902447435198359	6.88825503878332e-08	0.00139638706146215
	ENSG00000233144.1_7	AL512656.2	Gene	Heart failure (pre-LVAD)	iPSC-CVPC	-1.29527600421793	0.124020194347447	1.55971159330351e-25	3.16184734194488e-21
	ENSG00000233205.1_6	WBP1P2	Gene	Heart failure (pre-LVAD)	iPSC-CVPC	-5.4176930185085	1.02457952108192	1.2384812090318e-07	0.00251064910694927
	ENSG00000233271.1_7	AL590440.1	Gene	Heart failure (pre-LVAD)	iPSC-CVPC	-1.18323974308689	0.114830569264344	6.7434705866744e-25	1.36703635733063e-20
	ENSG00000233276.6_8	GPX1	Gene	Heart failure (pre-LVAD)	iPSC-CVPC	-5.26628617582817	0.70162614375153	6.10408457471101e-14	1.23742002498542e-09
	ENSG00000233476.3_4	EEF1A1P6	Gene	Heart failure (pre-LVAD)	iPSC-CVPC	-4.74258270127363	0.691540265530745	6.98315701409271e-12	1.41562558989687e-07
	ENSG00000233859.2_3	ADH5P4	Gene	Heart failure (pre-LVAD)	iPSC-CVPC	-3.0753623829704	0.53351909374782	8.19990242672546e-09	0.000166228421994579
	ENSG00000233927.5_4	RPS28	Gene	Heart failure (pre-LVAD)	iPSC-CVPC	-3.57398618772531	0.697987311549509	3.04860561627872e-07	0.00618013330532022
	ENSG00000234009.1_4	RPL5P34	Gene	Heart failure (pre-LVAD)	iPSC-CVPC	-5.41437988634532	0.856327437415893	2.56879724960523e-10	5.20746578439972e-06
	ENSG00000234441.1_5	AC105272.1	Gene	Heart failure (pre-LVAD)	iPSC-CVPC	-1.24179458868334	0.192071932031956	1.01126143524036e-10	2.05002918151926e-06
	ENSG00000234648.1_5	AL162151.2	Gene	Heart failure (pre-LVAD)	iPSC-CVPC	5.8559641447675	0.742543906705339	3.11143066277731e-15	6.30749223958216e-11
	ENSG00000234664.1_3	HMGN2P5	Gene	Heart failure (pre-LVAD)	iPSC-CVPC	-7.7419166862566	0.908291403204065	1.54663119823121e-17	3.13533076505431e-13
	ENSG00000234825.3_5	XRCC6P2	Gene	Heart failure (pre-LVAD)	iPSC-CVPC	-4.11392572788067	0.56079896323061	2.2035195933458e-13	4.46697491963061e-09
	ENSG00000235034.7_5	C19orf81	Gene	Heart failure (pre-LVAD)	iPSC-CVPC	-3.87183261919943	0.784644825106495	8.03549134738459e-07	0.016289548059418
	ENSG00000235043.3_4	TECRP1	Gene	Heart failure (pre-LVAD)	iPSC-CVPC	-5.53046666276342	0.639979758825616	5.54178735765618e-18	1.12343113314406e-13
	ENSG00000235082.2_5	SUMO1P3	Gene	Heart failure (pre-LVAD)	iPSC-CVPC	-4.94305485820423	0.966801783497303	3.17434486677889e-07	0.00643503191393417
	ENSG00000235106.10_7	BRD3OS	Gene	Heart failure (pre-LVAD)	iPSC-CVPC	-3.62630471531271	0.747132171657433	1.21220508956969e-06	0.0245738215757568
	ENSG00000235217.6_5	TSPY26P	Gene	Heart failure (pre-LVAD)	iPSC-CVPC	-2.35996721592136	0.498988934526355	2.25075565416944e-06	0.0456273186213229
	ENSG00000235297.3_4	FAUP1	Gene	Heart failure (pre-LVAD)	iPSC-CVPC	-5.63849083892481	0.759623031589572	1.14714344275073e-13	2.32548918714428e-09
	ENSG00000235426.2_7	AL133481.1	Gene	Heart failure (pre-LVAD)	iPSC-CVPC	-1.25269077778879	0.231365844999318	6.15190014239206e-08	0.00124711319686572
	ENSG00000235576.1_5	LINC01871	Gene	Heart failure (pre-LVAD)	iPSC-CVPC	-1.05028476909641	0.202187944950818	2.05164452513035e-07	0.00415909378134425
	ENSG00000235579.1_6	RPL38P5	Gene	Heart failure (pre-LVAD)	iPSC-CVPC	-1.63164507575516	0.219659764814714	1.10205145238337e-13	2.23407870427157e-09
	ENSG00000235587.2_5	GAPDHP65	Gene	Heart failure (pre-LVAD)	iPSC-CVPC	-4.36122690946289	0.462746114968256	4.31482517928421e-21	8.74701360344495e-17
	ENSG00000235776.2_6	AC000089.1	Gene	Heart failure (pre-LVAD)	iPSC-CVPC	-5.21225270948198	0.714508801797712	2.98935510268586e-13	6.06002066416478e-09
	ENSG00000235872.2_7	AC078777.1	Gene	Heart failure (pre-LVAD)	iPSC-CVPC	3.08882256573136	0.582420649761577	1.13651693621462e-07	0.00230394713309428
	ENSG00000236208.1_7	C10orf71-AS1	Gene	Heart failure (pre-LVAD)	iPSC-CVPC	1.7193393811824	0.342726532301102	5.25799700737776e-07	0.0106590115333562
	ENSG00000236326.1_7	AL050331.2	Gene	Heart failure (pre-LVAD)	iPSC-CVPC	-1.91530461626877	0.35420877178776	6.3990470428366e-08	0.00129721481652384
	ENSG00000236552.2_2	RPL13AP5	Gene	Heart failure (pre-LVAD)	iPSC-CVPC	-4.66351326188091	0.854531236623696	4.83174631754418e-08	0.000979491613492556
	ENSG00000236603.2_2	RANP1	Gene	Heart failure (pre-LVAD)	iPSC-CVPC	-4.91965484849508	0.56034412270577	1.63907232238685e-18	3.32272741194262e-14
	ENSG00000236654.2_5	AC079780.1	Gene	Heart failure (pre-LVAD)	iPSC-CVPC	-3.19140209694774	0.49248231918465	9.1578715068204e-11	1.85648371186263e-06
	ENSG00000236876.3_4	TMSB4XP1	Gene	Heart failure (pre-LVAD)	iPSC-CVPC	-1.1575736359688	0.172232259585525	1.80477140301677e-11	3.6586325881956e-07
	ENSG00000236883.1_6	AP001615.1	Gene	Heart failure (pre-LVAD)	iPSC-CVPC	-1.1855748959551	0.113573936848465	1.64892679668376e-25	3.34270440223732e-21
	ENSG00000237181.1_8	PRKAR1B-AS1	Gene	Heart failure (pre-LVAD)	iPSC-CVPC	-2.31650993957723	0.482320381109916	1.56427122403228e-06	0.0317109062535824
	ENSG00000237214.3_6	AL080243.4	Gene	Heart failure (pre-LVAD)	iPSC-CVPC	-6.28364329757256	0.634154035066654	3.8157137248065e-23	7.73521486292774e-19
	ENSG00000237264.4_5	FTH1P11	Gene	Heart failure (pre-LVAD)	iPSC-CVPC	-4.27956348297368	0.567172994208785	4.50801518011889e-14	9.13864837313701e-10
	ENSG00000237298.10_8	TTN-AS1	Gene	Heart failure (pre-LVAD)	iPSC-CVPC	2.91301843076608	0.536359801636409	5.60108314243623e-08	0.00113545157463467
	ENSG00000237493.3_8	AC034102.1	Gene	Heart failure (pre-LVAD)	iPSC-CVPC	-4.32999411826916	0.757838617229149	1.10604479029645e-08	0.000224217399888896
	ENSG00000237991.3_4	RPL35P1	Gene	Heart failure (pre-LVAD)	iPSC-CVPC	-6.35035174321651	0.933922596730104	1.04869756281337e-11	2.12591969933526e-07
	ENSG00000238103.4_3	RPL9P7	Gene	Heart failure (pre-LVAD)	iPSC-CVPC	-7.18354061902927	0.834644906094845	7.51920878313305e-18	1.52429400451673e-13
	ENSG00000239467.6_9	AC007405.4	Gene	Heart failure (pre-LVAD)	iPSC-CVPC	-2.99419220319503	0.631044654205064	2.08693611967402e-06	0.0423063690180317
	ENSG00000239559.2_5	RPL37P2	Gene	Heart failure (pre-LVAD)	iPSC-CVPC	-5.77154797748802	0.992836267935105	6.12926451034837e-09	0.000124252450153782
	ENSG00000239799.1_7	ITIH4-AS1	Gene	Heart failure (pre-LVAD)	iPSC-CVPC	-1.91699759144201	0.218854120839832	1.96556673668931e-18	3.98459688861657e-14
	ENSG00000239839.7_6	DEFA3	Gene	Heart failure (pre-LVAD)	iPSC-CVPC	-1.21739744744266	0.249926271116481	1.11020041866661e-06	0.0225059828872095
	ENSG00000239855.1_6	IGKV1-6	Gene	Heart failure (pre-LVAD)	iPSC-CVPC	-1.59491558730132	0.272724060388923	4.9724143135282e-09	0.000100800782963844
	ENSG00000239998.6_7	LILRA2	Gene	Heart failure (pre-LVAD)	iPSC-CVPC	-2.12928151430095	0.450670533531118	2.3045922513528e-06	0.046718694119424
	ENSG00000240087.3_5	RPSAP12	Gene	Heart failure (pre-LVAD)	iPSC-CVPC	-4.39151983023844	0.897714327831564	9.98722110121274e-07	0.0202460946163785
	ENSG00000240338.6_6	AC009078.2	Gene	Heart failure (pre-LVAD)	iPSC-CVPC	-1.86823634180218	0.330789688757131	1.62507402258508e-08	0.000329435005858447
	ENSG00000240395.1_4	RPL5P23	Gene	Heart failure (pre-LVAD)	iPSC-CVPC	-3.44836696293521	0.653040708953974	1.28847439713578e-07	0.00261199529787365
	ENSG00000240489.1_4	SETP14	Gene	Heart failure (pre-LVAD)	iPSC-CVPC	-4.61163278192176	0.668223719170427	5.15176908539922e-12	1.04436662899213e-07
	ENSG00000240864.3_5	IGKV1-16	Gene	Heart failure (pre-LVAD)	iPSC-CVPC	-1.49324022512142	0.256781883341141	6.05583078765483e-09	0.000122763801727339
	ENSG00000240972.2_6	MIF	Gene	Heart failure (pre-LVAD)	iPSC-CVPC	-6.97981778393906	0.768476803181429	1.05947776563197e-19	2.14777332648913e-15
	ENSG00000241294.1_4	IGKV2-24	Gene	Heart failure (pre-LVAD)	iPSC-CVPC	-1.33802783375956	0.248730891696763	7.47263578068189e-08	0.00151485272545983
	ENSG00000241357.1_8	AC092849.1	Gene	Heart failure (pre-LVAD)	iPSC-CVPC	-1.94309352842499	0.314551613104142	6.51889232216685e-10	1.32150985154966e-05
	ENSG00000241680.1_4	RPL31P49	Gene	Heart failure (pre-LVAD)	iPSC-CVPC	-6.57853334864976	0.995147417833267	3.8273471615331e-11	7.7587981658599e-07
	ENSG00000241755.1_4	IGKV1-9	Gene	Heart failure (pre-LVAD)	iPSC-CVPC	-1.41871679144354	0.282074626982138	4.91556386705801e-07	0.0099648310713
	ENSG00000241889.1_5	AC079944.2	Gene	Heart failure (pre-LVAD)	iPSC-CVPC	-6.35977755650619	1.02847064119015	6.26071874183915e-10	1.26917290334563e-05
	ENSG00000242076.1	IGKV1-33	Gene	Heart failure (pre-LVAD)	iPSC-CVPC	-1.3113269751458	0.268867703977007	1.07591350386592e-06	0.0218109185503699
	ENSG00000242114.6_5	MTFP1	Gene	Heart failure (pre-LVAD)	iPSC-CVPC	-3.83995618850758	0.682538373501096	1.84443705101725e-08	0.000373904278982217
	ENSG00000242372.8_7	EIF6	Gene	Heart failure (pre-LVAD)	iPSC-CVPC	-3.26306585928415	0.63662847715049	2.96683360891289e-07	0.00601436509198821
	ENSG00000243230.1_7	AC011005.4	Gene	Heart failure (pre-LVAD)	iPSC-CVPC	-1.96370085618653	0.394010337362947	6.23212350105365e-07	0.012633760761336
	ENSG00000243238.1_4	IGKV2-30	Gene	Heart failure (pre-LVAD)	iPSC-CVPC	-1.76306991821515	0.337020475291713	1.68282347893079e-07	0.0034114197564885
	ENSG00000243264.2_5	IGKV2D-29	Gene	Heart failure (pre-LVAD)	iPSC-CVPC	-1.39486658950708	0.237757019468236	4.44356930862927e-09	9.00800370245326e-05
	ENSG00000243466.1_4	IGKV1-5	Gene	Heart failure (pre-LVAD)	iPSC-CVPC	-1.97131924786531	0.34999449041101	1.77688622591578e-08	0.000360210375717647
	ENSG00000243547.1_4	HNRNPKP4	Gene	Heart failure (pre-LVAD)	iPSC-CVPC	-4.77395308609665	0.550082254920804	4.00611078912241e-18	8.12118779170895e-14
	ENSG00000243678.11_4	NME2	Gene	Heart failure (pre-LVAD)	iPSC-CVPC	-3.19467035524119	0.636973313339951	5.29256655579413e-07	0.0107290909219059
	ENSG00000243927.6_5	MRPS6	Gene	Heart failure (pre-LVAD)	iPSC-CVPC	-2.6393779540163	0.426356747219118	5.99589347269939e-10	1.21548752478562e-05
	ENSG00000244050.2_7	DEFB109F	Gene	Heart failure (pre-LVAD)	iPSC-CVPC	-1.69280929433567	0.322826416894477	1.57376367222253e-07	0.00319033371632951
	ENSG00000244165.2_5	P2RY11	Gene	Heart failure (pre-LVAD)	iPSC-CVPC	-3.98504816869994	0.791315288475631	4.75409565748518e-07	0.00963750271685396
	ENSG00000244171.4_3	PBX2P1	Gene	Heart failure (pre-LVAD)	iPSC-CVPC	-5.7474413013485	0.549297619322646	1.27401688621557e-25	2.5826870317362e-21
	ENSG00000244313.3_5	AC024293.1	Gene	Heart failure (pre-LVAD)	iPSC-CVPC	-5.43972710514631	1.02821687959786	1.22017648412785e-07	0.00247354176862398
	ENSG00000244437.1_5	IGKV3-15	Gene	Heart failure (pre-LVAD)	iPSC-CVPC	-1.93808136872307	0.309599185283481	3.8505347847926e-10	7.80580411573156e-06
	ENSG00000244486.9_5	SCARF2	Gene	Heart failure (pre-LVAD)	iPSC-CVPC	-1.9813918585833	0.330863560624914	2.11724449560837e-09	4.29207804149729e-05
	ENSG00000244491.1_7	AL021707.5	Gene	Heart failure (pre-LVAD)	iPSC-CVPC	-1.44673470457007	0.305820689462716	2.23787452006414e-06	0.0453661922707402
	ENSG00000244575.3_5	IGKV1-27	Gene	Heart failure (pre-LVAD)	iPSC-CVPC	-1.67426468220036	0.274780790939472	1.10750260677452e-09	2.24512928445331e-05
	ENSG00000244627.5_8	TPTEP2	Gene	Heart failure (pre-LVAD)	iPSC-CVPC	3.77912981839634	0.729862333402972	2.24437583624544e-07	0.00454979869523676
	ENSG00000244953.1_7	AC087521.1	Gene	Heart failure (pre-LVAD)	iPSC-CVPC	-2.08546065380905	0.435246723663901	1.65584573283363e-06	0.0335673046960034
	ENSG00000245025.3_9	AC107959.1	Gene	Heart failure (pre-LVAD)	iPSC-CVPC	2.8445017342319	0.568794443463442	5.705414653927e-07	0.0115660165864408
	ENSG00000245573.9_9	BDNF-AS	Gene	Heart failure (pre-LVAD)	iPSC-CVPC	3.87786738697647	0.703971146176415	3.61780669398569e-08	0.000733401773004779
	ENSG00000246089.3_8	AC016065.1	Gene	Heart failure (pre-LVAD)	iPSC-CVPC	-3.54450492722958	0.663174543270088	9.05398307837421e-08	0.00183542344964802
	ENSG00000247993.2_5	FOXD1-AS1	Gene	Heart failure (pre-LVAD)	iPSC-CVPC	-1.21501296544418	0.115835832659281	9.69533301504492e-26	1.96543790880991e-21
	ENSG00000248126.1_5	AC091849.1	Gene	Heart failure (pre-LVAD)	iPSC-CVPC	-1.20418235127541	0.112017154229504	5.92734150503553e-27	1.2015906699008e-22
	ENSG00000248180.1_4	GAPDHP60	Gene	Heart failure (pre-LVAD)	iPSC-CVPC	-6.35149392277289	0.671665876424552	3.18942314740501e-21	6.46559860441944e-17
	ENSG00000248223.1_6	AC026785.2	Gene	Heart failure (pre-LVAD)	iPSC-CVPC	-1.41901343968207	0.201624271478605	1.95144914770388e-12	3.95597771222531e-08
	ENSG00000248429.5_8	FAM198B-AS1	Gene	Heart failure (pre-LVAD)	iPSC-CVPC	2.87090605085072	0.606888770353927	2.23933491767234e-06	0.0453957974510537
	ENSG00000248527.1_5	MTATP6P1	Gene	Heart failure (pre-LVAD)	iPSC-CVPC	4.71828899975691	0.520254517379788	1.19900952668953e-19	2.43063211250502e-15
	ENSG00000248648.1_6	AC113410.2	Gene	Heart failure (pre-LVAD)	iPSC-CVPC	-1.31800543961091	0.270510995842325	1.10317412355456e-06	0.022363545832698
	ENSG00000249252.5_9	C1QTNF7-AS1	Gene	Heart failure (pre-LVAD)	iPSC-CVPC	-1.96738579100185	0.311606795498971	2.7247594398156e-10	5.52363233639418e-06
	ENSG00000249532.5_9	MIR302CHG	Gene	Heart failure (pre-LVAD)	iPSC-CVPC	6.4664474253052	1.33316966994565	1.23193517709633e-06	0.0249737899100968
	ENSG00000250740.1_7	AC109361.2	Gene	Heart failure (pre-LVAD)	iPSC-CVPC	-1.23120065339682	0.116856752845384	5.89645667223863e-26	1.19532969659622e-21
	ENSG00000250906.1_7	AC131953.2	Gene	Heart failure (pre-LVAD)	iPSC-CVPC	-1.9408417543408	0.296387385433874	5.81848973573154e-11	1.1795242392275e-06
	ENSG00000252714.1_1	RNA5SP392	Gene	Heart failure (pre-LVAD)	iPSC-CVPC	-1.27113659139048	0.115068543118078	2.27225546247023e-28	4.60631627351965e-24
	ENSG00000253629.1_6	AP000426.1	Gene	Heart failure (pre-LVAD)	iPSC-CVPC	-1.67725167434688	0.295087118684906	1.31641617059702e-08	0.000266863886103428
	ENSG00000253738.2_9	OTUD6B-AS1	Gene	Heart failure (pre-LVAD)	iPSC-CVPC	3.13807644882137	0.591799466338399	1.14164258553092e-07	0.00231433784938828
	ENSG00000254230.1_7	AC037459.3	Gene	Heart failure (pre-LVAD)	iPSC-CVPC	-1.6723268891586	0.353132580319049	2.18309668124376e-06	0.0442557359221735
	ENSG00000254332.1_5	AF201337.1	Gene	Heart failure (pre-LVAD)	iPSC-CVPC	-3.76645804411392	0.537272252054747	2.37749530170455e-12	4.81965847561546e-08
	ENSG00000254756.1_6	AP001107.6	Gene	Heart failure (pre-LVAD)	iPSC-CVPC	-2.22756863996864	0.374923134313388	2.82596591442621e-09	5.72879810172481e-05
	ENSG00000254829.1_6	AP003032.2	Gene	Heart failure (pre-LVAD)	iPSC-CVPC	-2.17814861940311	0.389897957619688	2.31747374568236e-08	0.000469798277724728
	ENSG00000254902.1_7	ANO1-AS1	Gene	Heart failure (pre-LVAD)	iPSC-CVPC	-1.0480744679297	0.2111302925926	6.90160272527468e-07	0.0139909290446768
	ENSG00000255050.1_7	AC067930.4	Gene	Heart failure (pre-LVAD)	iPSC-CVPC	-1.40125206116458	0.20534500711554	8.86067769205772e-12	1.79623658173394e-07
	ENSG00000255091.1_6	AC087442.1	Gene	Heart failure (pre-LVAD)	iPSC-CVPC	-1.31703824001639	0.126932409263263	3.1918369535515e-25	6.4704918722396e-21
	ENSG00000255114.1_6	AP003392.3	Gene	Heart failure (pre-LVAD)	iPSC-CVPC	-1.13739190803509	0.218575858351178	1.95413604514894e-07	0.00396142459072593
	ENSG00000255301.1_7	AP002893.1	Gene	Heart failure (pre-LVAD)	iPSC-CVPC	-2.16058906281269	0.415185828872653	1.95140117872868e-07	0.00395588046951878
	ENSG00000255400.1_6	AC124276.2	Gene	Heart failure (pre-LVAD)	iPSC-CVPC	-1.59578227656483	0.314293422322698	3.82706176938996e-07	0.00775821961890733
	ENSG00000255529.9_8	POLR2M	Gene	Heart failure (pre-LVAD)	iPSC-CVPC	-4.70454895949226	0.798486048849048	3.81927805738846e-09	7.74244047793789e-05
	ENSG00000255591.1	AL590762.1	Gene	Heart failure (pre-LVAD)	iPSC-CVPC	-1.13865067610449	0.191794320623101	2.90582005502415e-09	5.89067841554496e-05
	ENSG00000255839.1_7	AC117503.1	Gene	Heart failure (pre-LVAD)	iPSC-CVPC	-1.32263380990835	0.252264352732738	1.57946447355692e-07	0.00320189038079459
	ENSG00000255986.6_3	MT1JP	Gene	Heart failure (pre-LVAD)	iPSC-CVPC	-1.52778723301912	0.285775180631959	8.98616862443476e-08	0.00182167610354541
	ENSG00000256006.1_8	AC084117.1	Gene	Heart failure (pre-LVAD)	iPSC-CVPC	-1.33513505741232	0.21662949658646	7.12807572500314e-10	1.44500351097264e-05
	ENSG00000256148.1_5	AP000763.2	Gene	Heart failure (pre-LVAD)	iPSC-CVPC	-1.12169179513218	0.100068530411084	3.67349541025598e-29	7.44690989567092e-25
	ENSG00000256287.1_6	LINC02398	Gene	Heart failure (pre-LVAD)	iPSC-CVPC	-1.62409113112031	0.147320344477415	2.92055874132177e-28	5.92055668040749e-24
	ENSG00000256364.1_7	AC069234.2	Gene	Heart failure (pre-LVAD)	iPSC-CVPC	3.16256537406747	0.474649771366101	2.68393920248115e-11	5.44088155126979e-07
	ENSG00000256499.2_8	LINC02468	Gene	Heart failure (pre-LVAD)	iPSC-CVPC	-1.07804032480022	0.194382117701283	2.92303749780923e-08	0.000592558161555887
	ENSG00000256661.1_8	A2ML1-AS1	Gene	Heart failure (pre-LVAD)	iPSC-CVPC	-1.20454644971367	0.250606083687991	1.53570026374676e-06	0.0311317157466743
	ENSG00000256843.1_6	AC023157.1	Gene	Heart failure (pre-LVAD)	iPSC-CVPC	-1.95804085866004	0.353863387893179	3.14217850319846e-08	0.000636982426168392
	ENSG00000256928.1_7	AP000763.4	Gene	Heart failure (pre-LVAD)	iPSC-CVPC	-1.91879503134758	0.287499689897752	2.48793187614456e-11	5.04353549932025e-07
	ENSG00000257671.1_7	KRT7-AS	Gene	Heart failure (pre-LVAD)	iPSC-CVPC	-1.49625076088158	0.254061547984045	3.87778637501821e-09	7.86104853943691e-05
	ENSG00000257829.1_7	AC121757.1	Gene	Heart failure (pre-LVAD)	iPSC-CVPC	-1.41647062541413	0.236498773016332	2.10699416388933e-09	4.27129856903645e-05
	ENSG00000258092.1_8	AC005841.1	Gene	Heart failure (pre-LVAD)	iPSC-CVPC	-2.1837530732108	0.365096344972778	2.21355159631394e-09	4.48731179604762e-05
	ENSG00000258315.5_5	C17orf49	Gene	Heart failure (pre-LVAD)	iPSC-CVPC	-3.97164947845189	0.73508617954513	6.55459766348791e-08	0.00132874803834227
	ENSG00000258427.3_5	RBM8B	Gene	Heart failure (pre-LVAD)	iPSC-CVPC	-3.90066235410026	0.680466780113831	9.90583987919076e-09	0.000200811186030955
	ENSG00000258444.1_6	AL132855.1	Gene	Heart failure (pre-LVAD)	iPSC-CVPC	-0.957788741854957	0.160627609016538	2.47966634690192e-09	5.02677961843957e-05
	ENSG00000258476.6_7	LINC02207	Gene	Heart failure (pre-LVAD)	iPSC-CVPC	-1.8178762025794	0.347460587782999	1.6778395059312e-07	0.00340131624642373
	ENSG00000258666.1_7	AL157871.4	Gene	Heart failure (pre-LVAD)	iPSC-CVPC	-1.91850359921764	0.389791068316954	8.57181908749798e-07	0.0173767916541759
	ENSG00000258800.1_7	AL136038.4	Gene	Heart failure (pre-LVAD)	iPSC-CVPC	-1.35898936693909	0.268748709224647	4.26508849756101e-07	0.00864618740225568
	ENSG00000258908.1_7	AL355075.3	Gene	Heart failure (pre-LVAD)	iPSC-CVPC	-1.7369784869229	0.320180749269824	5.79566457106626e-08	0.00117489712184655
	ENSG00000259001.3_7	AL355075.4	Gene	Heart failure (pre-LVAD)	iPSC-CVPC	-3.27542543733494	0.639275675911573	2.99675489562908e-07	0.00607502152441927
	ENSG00000259018.1_6	AL049829.2	Gene	Heart failure (pre-LVAD)	iPSC-CVPC	-1.61373144224487	0.239979627539741	1.76254731158122e-11	3.57303591003745e-07
	ENSG00000259255.1_8	AC073941.1	Gene	Heart failure (pre-LVAD)	iPSC-CVPC	-1.46777091929166	0.161693067157851	1.11083962542611e-19	2.25189408866381e-15
	ENSG00000259261.2_6	IGHV4OR15-8	Gene	Heart failure (pre-LVAD)	iPSC-CVPC	-1.83107883564429	0.195225566433059	6.64131948382971e-21	1.34632828576196e-16
	ENSG00000259384.7_6	GH1	Gene	Heart failure (pre-LVAD)	iPSC-CVPC	-1.11675473385935	0.217692801266167	2.89808201106929e-07	0.00587499185283966
	ENSG00000259430.2_7	CERS3-AS1	Gene	Heart failure (pre-LVAD)	iPSC-CVPC	-2.1784295556223	0.245899952277094	8.07298392638965e-19	1.63655530155771e-14
	ENSG00000259712.1_7	AC023906.5	Gene	Heart failure (pre-LVAD)	iPSC-CVPC	-2.00330355243981	0.380300683421826	1.38156197957615e-07	0.00280070244499677
	ENSG00000259732.1_7	AC092757.2	Gene	Heart failure (pre-LVAD)	iPSC-CVPC	-2.2230629748472	0.422261504739133	1.40449541333666e-07	0.00284719310191608
	ENSG00000259792.1_7	AC104758.1	Gene	Heart failure (pre-LVAD)	iPSC-CVPC	-1.89182304616802	0.246326595403322	1.58913271824202e-14	3.22148984642022e-10
	ENSG00000259813.1_6	AC138028.3	Gene	Heart failure (pre-LVAD)	iPSC-CVPC	-1.27751449950685	0.124407809623009	9.74445709332318e-25	1.97539634195848e-20
	ENSG00000259917.1_4	HNRNPLP2	Gene	Heart failure (pre-LVAD)	iPSC-CVPC	-5.00457741309486	0.713293245957543	2.28053760008921e-12	4.62310582290085e-08
	ENSG00000259918.1_4	NDUFA5P11	Gene	Heart failure (pre-LVAD)	iPSC-CVPC	-3.57869962260661	0.756853591714293	2.26306192423114e-06	0.0458767913280137
	ENSG00000259956.2_4	RBM15B	Gene	Heart failure (pre-LVAD)	iPSC-CVPC	-2.93826021016349	0.493831052960981	2.6825714756804e-09	5.43810889549931e-05
	ENSG00000260005.6_6	AC027601.2	Gene	Heart failure (pre-LVAD)	iPSC-CVPC	-1.47505468450789	0.28832774396371	3.12255472721914e-07	0.00633004294301864
	ENSG00000260107.1_6	AC005606.1	Gene	Heart failure (pre-LVAD)	iPSC-CVPC	-1.10228536237042	0.193047546137123	1.13031638331068e-08	0.000229137737224741
	ENSG00000260206.1_6	AC105020.2	Gene	Heart failure (pre-LVAD)	iPSC-CVPC	-2.1132045505957	0.437022045919534	1.32835138715528e-06	0.0269283393204118
	ENSG00000260290.2_7	AC092115.2	Gene	Heart failure (pre-LVAD)	iPSC-CVPC	-4.95684144373672	0.693701318964678	8.96701439131582e-13	1.81779315740754e-08
	ENSG00000260570.1_8	AC133550.2	Gene	Heart failure (pre-LVAD)	iPSC-CVPC	-1.11978136822236	0.195795518255134	1.07066524054821e-08	0.000217045257563933
	ENSG00000260628.5_6	AC142381.3	Gene	Heart failure (pre-LVAD)	iPSC-CVPC	4.71240426944626	0.942491261000096	5.73467331918239e-07	0.0116253297526465
	ENSG00000260755.1_6	AC010542.2	Gene	Heart failure (pre-LVAD)	iPSC-CVPC	-1.24176079376533	0.254576530028313	1.07302537915635e-06	0.0217523704862575
	ENSG00000261002.5_6	AC036103.1	Gene	Heart failure (pre-LVAD)	iPSC-CVPC	-1.70215380512316	0.336828272828881	4.33839422580872e-07	0.00879479277455944
	ENSG00000261039.3_8	LINC02544	Gene	Heart failure (pre-LVAD)	iPSC-CVPC	-1.53281297262088	0.25060713706733	9.57141479670849e-10	1.94031720758875e-05
	ENSG00000261113.1_7	AC009034.1	Gene	Heart failure (pre-LVAD)	iPSC-CVPC	-1.71374843398755	0.225355161494767	2.85663164723186e-14	5.79096367526843e-10
	ENSG00000261221.3_2	ZNF865	Gene	Heart failure (pre-LVAD)	iPSC-CVPC	-4.47659333497891	0.857930709025659	1.8096688477501e-07	0.003668560688159
	ENSG00000261460.1_6	AC009690.2	Gene	Heart failure (pre-LVAD)	iPSC-CVPC	-1.23533786918191	0.236822543210496	1.82530643539103e-07	0.0037002612058247
	ENSG00000261505.1_7	AL031714.1	Gene	Heart failure (pre-LVAD)	iPSC-CVPC	-1.39939660318793	0.29210774975697	1.66211791422072e-06	0.0336944543570824
	ENSG00000261552.1_7	AC109460.4	Gene	Heart failure (pre-LVAD)	iPSC-CVPC	-1.62381703400423	0.251542639049582	1.07908835472005e-10	2.18752791268849e-06
	ENSG00000261614.1_5	YBX3P1	Gene	Heart failure (pre-LVAD)	iPSC-CVPC	-5.0217912663823	0.785192549722144	1.59899751824602e-10	3.24148776898833e-06
	ENSG00000261691.1_7	Z97986.1	Gene	Heart failure (pre-LVAD)	iPSC-CVPC	-1.45317724748349	0.297923657720148	1.07339088646409e-06	0.0217597800504
	ENSG00000261706.1_5	LINC00165	Gene	Heart failure (pre-LVAD)	iPSC-CVPC	-1.18578402594351	0.157688858068116	5.48724698404392e-14	1.11237470860538e-09
	ENSG00000261779.1_8	AC113208.5	Gene	Heart failure (pre-LVAD)	iPSC-CVPC	-1.5280764570051	0.234556366830048	7.28100640980939e-11	1.47600561939656e-06
	ENSG00000262814.8_5	MRPL12	Gene	Heart failure (pre-LVAD)	iPSC-CVPC	-3.26582350508697	0.534365190614745	9.86403955597703e-10	1.99963809878766e-05
	ENSG00000262905.1_6	AC015853.1	Gene	Heart failure (pre-LVAD)	iPSC-CVPC	-2.13601901135524	0.252570830612266	2.7408800962053e-17	5.55631213102739e-13
	ENSG00000263155.6_8	MYZAP	Gene	Heart failure (pre-LVAD)	iPSC-CVPC	1.26094035057533	0.246439198119445	3.11028507617962e-07	0.00630516990643133
	ENSG00000263321.1_7	AC024361.3	Gene	Heart failure (pre-LVAD)	iPSC-CVPC	-1.59815490254838	0.32154976915892	6.68964918605523e-07	0.0135612568299712
	ENSG00000263388.1_7	AC002347.2	Gene	Heart failure (pre-LVAD)	iPSC-CVPC	-1.27740115372342	0.124430044738107	1.00257269184337e-24	2.03241536090488e-20
	ENSG00000263970.1_6	AP001094.1	Gene	Heart failure (pre-LVAD)	iPSC-CVPC	-1.62019436548565	0.304161954620229	9.9986220689656e-08	0.00202692066582071
	ENSG00000264031.1_7	ABHD15-AS1	Gene	Heart failure (pre-LVAD)	iPSC-CVPC	-1.08325918588847	0.107906667094874	1.0286308749654e-23	2.08524050972986e-19
	ENSG00000264364.3_4	DYNLL2	Gene	Heart failure (pre-LVAD)	iPSC-CVPC	2.30494114828472	0.471378738122373	1.00945666084207e-06	0.0204637054285904
	ENSG00000264558.1_6	AC015674.1	Gene	Heart failure (pre-LVAD)	iPSC-CVPC	2.01912077862138	0.315640706350238	1.58567225537468e-10	3.21447479609555e-06
	ENSG00000264573.1	RN7SL15P	Gene	Heart failure (pre-LVAD)	iPSC-CVPC	-1.13942978635769	0.232745250776266	9.80016623738849e-07	0.0198668969964339
	ENSG00000264584.1	RN7SL600P	Gene	Heart failure (pre-LVAD)	iPSC-CVPC	-1.72935762221785	0.347187347773832	6.32401173614098e-07	0.012820036591505
	ENSG00000265139.1_8	AC005899.4	Gene	Heart failure (pre-LVAD)	iPSC-CVPC	-1.32817494123422	0.273894565044172	1.2394803344463e-06	0.0251267453398954
	ENSG00000265531.3_6	FCGR1CP	Gene	Heart failure (pre-LVAD)	iPSC-CVPC	-1.56911090960664	0.302886344439442	2.21259802103349e-07	0.00448537870823909
	ENSG00000265784.1_7	AC006441.3	Gene	Heart failure (pre-LVAD)	iPSC-CVPC	-1.03600032458514	0.19920228872592	1.98491183556647e-07	0.00402381327306035
	ENSG00000266129.1_3	SRP68P1	Gene	Heart failure (pre-LVAD)	iPSC-CVPC	-1.20139495377833	0.242906015671715	7.57831055377523e-07	0.0153627511546131
	ENSG00000266341.1_7	AC004477.2	Gene	Heart failure (pre-LVAD)	iPSC-CVPC	-1.68390204608236	0.341440642670419	8.14935423652639e-07	0.0165203709082863
	ENSG00000266469.2_7	AC005288.1	Gene	Heart failure (pre-LVAD)	iPSC-CVPC	2.81376379197899	0.571954270538543	8.67386354050647e-07	0.0175836561693147
	ENSG00000266708.1_7	AP001793.1	Gene	Heart failure (pre-LVAD)	iPSC-CVPC	-2.10972049561157	0.412146118660727	3.07379272131333e-07	0.00623119260464638
	ENSG00000267110.1_9	AC010327.2	Gene	Heart failure (pre-LVAD)	iPSC-CVPC	1.13964503314617	0.20224847412756	1.75184542111221e-08	0.000355134103767867
	ENSG00000267125.2_7	AC012615.3	Gene	Heart failure (pre-LVAD)	iPSC-CVPC	-1.15072882308445	0.180597201081816	1.86825268361912e-10	3.78732184023268e-06
	ENSG00000267135.2_7	AD000091.1	Gene	Heart failure (pre-LVAD)	iPSC-CVPC	-1.80126305837915	0.288643760695798	4.36351522589629e-10	8.84571806593696e-06
	ENSG00000267322.2_7	SNHG22	Gene	Heart failure (pre-LVAD)	iPSC-CVPC	3.52241899622988	0.697105406981966	4.35102440569076e-07	0.00882039667521631
	ENSG00000267458.1_7	AC092069.1	Gene	Heart failure (pre-LVAD)	iPSC-CVPC	-1.33778826673656	0.266526048914401	5.18458587978972e-07	0.0105101924955097
	ENSG00000267633.1_7	AC008686.1	Gene	Heart failure (pre-LVAD)	iPSC-CVPC	-1.65847052864176	0.235798222002207	2.01515625963928e-12	4.08512476954075e-08
	ENSG00000267690.1_7	LDLRAD4-AS1	Gene	Heart failure (pre-LVAD)	iPSC-CVPC	-2.11808114145863	0.307442271059271	5.60431066939266e-12	1.13610585889928e-07
	ENSG00000267791.1_6	AC018761.4	Gene	Heart failure (pre-LVAD)	iPSC-CVPC	-1.04996396987816	0.100867556346971	2.24791385468215e-25	4.55697096621165e-21
	ENSG00000268030.1_7	AC005253.1	Gene	Heart failure (pre-LVAD)	iPSC-CVPC	-1.66756457122835	0.290559548830307	9.51534238456472e-09	0.000192895020819896
	ENSG00000268050.2_8	AL158151.3	Gene	Heart failure (pre-LVAD)	iPSC-CVPC	-2.52612802625785	0.36227340773292	3.10279701813126e-12	6.28999011515569e-08
	ENSG00000268062.1_6	SRP14P4	Gene	Heart failure (pre-LVAD)	iPSC-CVPC	-1.10108063010103	0.105704007914712	2.08177508028002e-25	4.22017444274366e-21
	ENSG00000268080.2_5	AC016885.3	Gene	Heart failure (pre-LVAD)	iPSC-CVPC	-1.24016134129497	0.121262238037657	1.4993836360396e-24	3.03955050697948e-20
	ENSG00000268191.1_8	AC010503.2	Gene	Heart failure (pre-LVAD)	iPSC-CVPC	-1.71751646897791	0.259809016026064	3.8253672604422e-11	7.75478451036843e-07
	ENSG00000268199.2_7	AC010335.1	Gene	Heart failure (pre-LVAD)	iPSC-CVPC	-1.34658283442398	0.269786536470158	5.99773761856147e-07	0.0121586137003478
	ENSG00000268295.1_4	POLR3GP1	Gene	Heart failure (pre-LVAD)	iPSC-CVPC	-1.33135624472492	0.132511532807784	9.46134110636273e-24	1.91800306908185e-19
	ENSG00000268475.1_7	AC011462.2	Gene	Heart failure (pre-LVAD)	iPSC-CVPC	-1.67368791824569	0.237664211326606	1.89176454963506e-12	3.83498509502019e-08
	ENSG00000268677.1_7	AC011495.3	Gene	Heart failure (pre-LVAD)	iPSC-CVPC	-1.506944228728	0.234445048938323	1.29542593669074e-10	2.62608745885947e-06
	ENSG00000268729.1_7	AC020922.2	Gene	Heart failure (pre-LVAD)	iPSC-CVPC	-1.57686110509358	0.330145331639058	1.78582335592966e-06	0.0362022110714061
	ENSG00000269151.1_7	AC007193.3	Gene	Heart failure (pre-LVAD)	iPSC-CVPC	-1.35876520592652	0.129163499586255	7.0073729295276e-26	1.42053464027384e-21
	ENSG00000269371.1_7	AC008878.4	Gene	Heart failure (pre-LVAD)	iPSC-CVPC	-1.67797887113189	0.34937021117233	1.56409305582515e-06	0.0317072944276874
	ENSG00000269711.1_9	AC008763.3	Gene	Heart failure (pre-LVAD)	iPSC-CVPC	-1.2120978864657	0.130749331722838	1.85458685305035e-20	3.75961846850367e-16
	ENSG00000269843.1_7	AC008537.2	Gene	Heart failure (pre-LVAD)	iPSC-CVPC	-1.59634780537513	0.321149487631067	6.67008407395424e-07	0.01352159443472
	ENSG00000269970.1_7	AL162424.1	Gene	Heart failure (pre-LVAD)	iPSC-CVPC	-1.16300553765541	0.112355336692406	4.1354295505216e-25	8.38334278481739e-21
	ENSG00000269971.1_7	AL020997.2	Gene	Heart failure (pre-LVAD)	iPSC-CVPC	-1.26455891937843	0.217092416651069	5.71195433306369e-09	0.000115792738239867
	ENSG00000270269.1_4	IMMP1LP1	Gene	Heart failure (pre-LVAD)	iPSC-CVPC	-1.41790896329153	0.268602319789449	1.30003483669012e-07	0.00263543062093821
	ENSG00000270532.1_2	PEBP1P2	Gene	Heart failure (pre-LVAD)	iPSC-CVPC	-6.457239409941	0.981084313556636	4.64982027687938e-11	9.42611566528988e-07
	ENSG00000270606.1_5	PPIAP52	Gene	Heart failure (pre-LVAD)	iPSC-CVPC	-1.40151707082641	0.135236584486844	3.63619867461593e-25	7.37130195318141e-21
	ENSG00000270714.1_5	MICOS10P2	Gene	Heart failure (pre-LVAD)	iPSC-CVPC	-1.22964686712867	0.18588920568653	3.71689974098583e-11	7.53489915492648e-07
	ENSG00000271032.1_7	AC020907.4	Gene	Heart failure (pre-LVAD)	iPSC-CVPC	-2.23480832468613	0.326181613959222	7.31187765201116e-12	1.4822638376157e-07
	ENSG00000271075.1_5	AL139317.4	Gene	Heart failure (pre-LVAD)	iPSC-CVPC	-1.99698900245205	0.287029079252049	3.4649940691781e-12	7.02423597703785e-08
	ENSG00000271218.1_7	AL033384.2	Gene	Heart failure (pre-LVAD)	iPSC-CVPC	-1.87062569075003	0.366493729059962	3.32348287564757e-07	0.00673736448551275
	ENSG00000272149.1_7	AC112211.1	Gene	Heart failure (pre-LVAD)	iPSC-CVPC	-1.62561958538894	0.252434978846928	1.19665982888411e-10	2.42586880511387e-06
	ENSG00000272239.1_6	AC011373.1	Gene	Heart failure (pre-LVAD)	iPSC-CVPC	-1.27253054904957	0.124036647513742	1.07470736518152e-24	2.17864677069598e-20
	ENSG00000272254.1_6	AC022893.3	Gene	Heart failure (pre-LVAD)	iPSC-CVPC	-1.93526423934867	0.181962811376209	2.03747921760717e-26	4.13037786993326e-22
	ENSG00000272430.1_8	LINC02637	Gene	Heart failure (pre-LVAD)	iPSC-CVPC	-1.84271877572743	0.312152999874306	3.56398616761703e-09	7.22491275899324e-05
	ENSG00000272600.1_7	AC007308.1	Gene	Heart failure (pre-LVAD)	iPSC-CVPC	-1.80122181823471	0.26604677559662	1.28497821552288e-11	2.60490783850798e-07
	ENSG00000273138.1_6	AC005021.1	Gene	Heart failure (pre-LVAD)	iPSC-CVPC	-1.85693285547234	0.365891042002528	3.87296562380965e-07	0.00785127591258692
	ENSG00000273837.1_8	AC018755.4	Gene	Heart failure (pre-LVAD)	iPSC-CVPC	-1.58314524830571	0.260869779116765	1.2893493088318e-09	2.61376891886383e-05
	ENSG00000274312.1_6	AC015722.2	Gene	Heart failure (pre-LVAD)	iPSC-CVPC	-2.01634644141014	0.332780355602063	1.3689297676238e-09	2.77509442492697e-05
	ENSG00000274478.1_6	AC009154.2	Gene	Heart failure (pre-LVAD)	iPSC-CVPC	-1.91196034432282	0.237814320287766	9.00446127790637e-16	1.82538439025718e-11
	ENSG00000274536.7_8	MIR223HG	Gene	Heart failure (pre-LVAD)	iPSC-CVPC	-1.58893972366314	0.271076371530751	4.5844390688582e-09	9.29357488038934e-05
	ENSG00000274576.2_5	IGHV2-70	Gene	Heart failure (pre-LVAD)	iPSC-CVPC	-1.31808032258727	0.221537565791005	2.68647243763979e-09	5.44601692558338e-05
	ENSG00000274630.1_6	AC125257.2	Gene	Heart failure (pre-LVAD)	iPSC-CVPC	-1.41539726490366	0.262517228047637	6.9819194677307e-08	0.00141537471449837
	ENSG00000274758.1_6	AC006435.3	Gene	Heart failure (pre-LVAD)	iPSC-CVPC	-1.22149904963683	0.115997893049906	6.25976323934694e-26	1.26897920388041e-21
	ENSG00000275339.1_5	Z99129.1	Gene	Heart failure (pre-LVAD)	iPSC-CVPC	-1.11372001420812	0.10972545251009	3.3115705029677e-24	6.71321572361612e-20
	ENSG00000275431.1_6	AC244100.2	Gene	Heart failure (pre-LVAD)	iPSC-CVPC	-1.57870791492969	0.321632748118526	9.1814083434539e-07	0.0186125509938497
	ENSG00000275567.1_7	AC008250.2	Gene	Heart failure (pre-LVAD)	iPSC-CVPC	-1.08435558884708	0.207446291468262	1.721307005525e-07	0.00348943356160028
	ENSG00000275688.4_3	CCL15-CCL14	Gene	Heart failure (pre-LVAD)	iPSC-CVPC	-1.32509775154636	0.269219807259653	8.5667694144891e-07	0.0173665549570523
	ENSG00000275874.1_8	PICSAR	Gene	Heart failure (pre-LVAD)	iPSC-CVPC	-1.34156771524835	0.198779582785261	1.48845342494821e-11	3.01739278305501e-07
	ENSG00000276045.3_6	ORAI1	Gene	Heart failure (pre-LVAD)	iPSC-CVPC	-4.19396913744149	0.676146389402426	5.54838377054843e-10	1.12476835796558e-05
	ENSG00000276269.1_7	AL355974.2	Gene	Heart failure (pre-LVAD)	iPSC-CVPC	-1.2180464745867	0.111487961294247	8.71908322004478e-28	1.76753255036748e-23
	ENSG00000276409.5_6	CCL14	Gene	Heart failure (pre-LVAD)	iPSC-CVPC	-1.86339408731693	0.369326986273317	4.52626681932118e-07	0.0091756480961279
	ENSG00000276566.1_3	IGKV1D-13	Gene	Heart failure (pre-LVAD)	iPSC-CVPC	-1.80255934485967	0.264316361714318	9.12282931756298e-12	1.84937995925637e-07
	ENSG00000277089.4_6	AC243829.4	Gene	Heart failure (pre-LVAD)	iPSC-CVPC	-1.83773414264346	0.346805803396157	1.16419899541228e-07	0.00236006420349977
	ENSG00000277435.1_5	AC138649.2	Gene	Heart failure (pre-LVAD)	iPSC-CVPC	-1.62244946110453	0.313856593211042	2.34850007862214e-07	0.0047608793593828
	ENSG00000277654.6_7	AC087633.2	Gene	Heart failure (pre-LVAD)	iPSC-CVPC	-6.05836110026322	1.08380438217491	2.27196814112588e-08	0.000460573381569038
	ENSG00000277791.5_4	PSMB3	Gene	Heart failure (pre-LVAD)	iPSC-CVPC	-4.70908181761707	0.656293331514481	7.21646510887465e-13	1.46292180687107e-08
	ENSG00000278263.2_8	AC135068.2	Gene	Heart failure (pre-LVAD)	iPSC-CVPC	-1.83107883564429	0.209857217838444	2.6534566358669e-18	5.37908729222938e-14
	ENSG00000278367.1_6	AL356652.1	Gene	Heart failure (pre-LVAD)	iPSC-CVPC	-2.26556445278482	0.405024375897625	2.22345422376237e-08	0.000450738640241108
	ENSG00000278934.1_6	AC117489.1	Gene	Heart failure (pre-LVAD)	iPSC-CVPC	1.35495444563653	0.287455003190953	2.43351003268841e-06	0.0493321153826595
	ENSG00000279172.1_5	AC020904.3	Gene	Heart failure (pre-LVAD)	iPSC-CVPC	-1.4334665849372	0.19975013351936	7.16240817746822e-13	1.45196338573636e-08
	ENSG00000279322.1_6	AL035252.5	Gene	Heart failure (pre-LVAD)	iPSC-CVPC	-1.25887329207154	0.220601268646419	1.15285606278589e-08	0.000233706981047956
	ENSG00000279428.1_5	AC087164.2	Gene	Heart failure (pre-LVAD)	iPSC-CVPC	-1.11456968982598	0.215658877178838	2.36350624020464e-07	0.00479129985014285
	ENSG00000279488.1_5	AC004623.1	Gene	Heart failure (pre-LVAD)	iPSC-CVPC	-1.56013871981089	0.296682387007921	1.45143689716284e-07	0.00294235287792851
	ENSG00000279713.1_8	AC080038.4	Gene	Heart failure (pre-LVAD)	iPSC-CVPC	-1.31365810443496	0.265546355003356	7.53655593351283e-07	0.0152781061884172
	ENSG00000279863.1_5	AC069547.1	Gene	Heart failure (pre-LVAD)	iPSC-CVPC	-2.26041066533135	0.424469345570232	1.00807382886092e-07	0.00204356726586686
	ENSG00000279926.1_5	AL138831.3	Gene	Heart failure (pre-LVAD)	iPSC-CVPC	-1.74249574544961	0.347768076167729	5.42857159293448e-07	0.0110048003331968
	ENSG00000280007.1_7	AC008079.1	Gene	Heart failure (pre-LVAD)	iPSC-CVPC	-1.55263341039552	0.273002894807858	1.29107771028413e-08	0.000261727273428799
	ENSG00000280110.1_7	AC087893.4	Gene	Heart failure (pre-LVAD)	iPSC-CVPC	-1.62534963830748	0.231646813324465	2.27496501564314e-12	4.61180907971177e-08
	ENSG00000280143.1_1	AP000892.4	Gene	Heart failure (pre-LVAD)	iPSC-CVPC	2.12312480795347	0.376664768314096	1.73397113155145e-08	0.00035151062778811
	ENSG00000280789.2_5	PAGR1	Gene	Heart failure (pre-LVAD)	iPSC-CVPC	-3.7468241993589	0.564758867382318	3.25872206257761e-11	6.60608136525733e-07
	ENSG00000282728.1_7	PGR-AS1	Gene	Heart failure (pre-LVAD)	iPSC-CVPC	-2.18716265154586	0.435156572725419	5.0042186286043e-07	0.0101445520039066
	ENSG00000283154.2_6	IQCJ-SCHIP1	Gene	Heart failure (pre-LVAD)	iPSC-CVPC	3.47046113935624	0.692028685509375	5.30584696612699e-07	0.0107560129697326
	ENSG00000283293.1_2	RN7SK	Gene	Heart failure (pre-LVAD)	iPSC-CVPC	-3.1638620240527	0.655121570457291	1.36926265991348e-06	0.0277576926417661
	ENSG00000283703.2_5	VSIG10L2	Gene	Heart failure (pre-LVAD)	iPSC-CVPC	-2.15766964015091	0.432771557401733	6.17375185767355e-07	0.0125154297658758
	ENSG00000284600.1_5	AC093390.2	Gene	Heart failure (pre-LVAD)	iPSC-CVPC	-1.79311162358369	0.216053947136827	1.04665023870612e-16	2.12176936390505e-12
	ENSG00000285599.1_3	AC234917.2	Gene	Heart failure (pre-LVAD)	iPSC-CVPC	-1.74616443811136	0.346807813998887	4.77941668776425e-07	0.00968883350943569
	ENSG00000285957.1_4	AC019257.9	Gene	Heart failure (pre-LVAD)	iPSC-CVPC	-1.36204042985806	0.21020810704948	9.20357709115074e-11	1.86574914791808e-06
	ENSG00000286898.1_1	AL049569.2	Gene	Heart failure (pre-LVAD)	iPSC-CVPC	-1.26944063612455	0.212985363174413	2.51891228507005e-09	5.10633898429401e-05
	ENSG00000287159.1_2	AL356737.2	Gene	Heart failure (pre-LVAD)	iPSC-CVPC	-1.16633101741864	0.230439999882397	4.1635956867364e-07	0.00844044117615203
	ENSG00000287566.1_2	AL732437.3	Gene	Heart failure (pre-LVAD)	iPSC-CVPC	-1.60995988461929	0.219239190625356	2.08243428098191e-13	4.22151077440653e-09
	ENSG00000288534.1_2	AP001931.2	Gene	Heart failure (pre-LVAD)	iPSC-CVPC	-2.72828067827228	0.496705741913604	3.95721819927763e-08	0.000802207273357561
ENST00000084795.9_4	ENSG00000063177.13_7	RPL18	Isoform	Heart failure (pre-LVAD)	iPSC-CVPC	-10.5156766721544	2.18956397235848	1.56591137620319e-06	0.0455836801612749
ENST00000209873.9_3	ENSG00000094914.14_7	AAAS	Isoform	Heart failure (pre-LVAD)	iPSC-CVPC	-43.1520606123407	8.17040357612268	1.281241369042e-07	0.00372969362528126
ENST00000216780.9_2	ENSG00000100889.12_4	PCK2	Isoform	Heart failure (pre-LVAD)	iPSC-CVPC	-64.2143248594324	12.7942192866598	5.19382284634888e-07	0.0151192183057216
ENST00000219069.6_2	ENSG00000006194.10_5	ZNF263	Isoform	Heart failure (pre-LVAD)	iPSC-CVPC	-80.1950510005959	12.0864400491857	3.24225747977834e-11	9.43821152363475e-07
ENST00000219782.10_3	ENSG00000103495.14_6	MAZ	Isoform	Heart failure (pre-LVAD)	iPSC-CVPC	-33.2204250259186	6.88824256185193	1.41576599433754e-06	0.0412129480951658
ENST00000220772.8_3	ENSG00000104332.12_6	SFRP1	Isoform	Heart failure (pre-LVAD)	iPSC-CVPC	-77.7322637702631	13.002717360216	2.25678532916546e-09	6.56950209320066e-05
ENST00000222266.2_1	ENSG00000205155.8_5	PSENEN	Isoform	Heart failure (pre-LVAD)	iPSC-CVPC	45.6460896600759	8.46324480828661	6.91174765003593e-08	0.00201200974092546
ENST00000222305.8_3	ENSG00000105698.16_5	USF2	Isoform	Heart failure (pre-LVAD)	iPSC-CVPC	-76.4072487289559	12.5127127753341	1.01922843304959e-09	2.96697396860736e-05
ENST00000222969.10_2	ENSG00000106245.11_4	BUD31	Isoform	Heart failure (pre-LVAD)	iPSC-CVPC	-64.8225573952134	9.10896512842641	1.10825008275585e-12	3.22611599090228e-08
ENST00000223321.9_3	ENSG00000106588.11_6	PSMA2	Isoform	Heart failure (pre-LVAD)	iPSC-CVPC	-73.4141615439016	13.439532316752	4.693345628747e-08	0.00136623291252825
ENST00000223369.3_2	ENSG00000106636.8_5	YKT6	Isoform	Heart failure (pre-LVAD)	iPSC-CVPC	-34.5174825804392	6.27001597372278	3.68819298976949e-08	0.0010736329793219
ENST00000228251.9_3	ENSG00000060138.13_8	YBX3	Isoform	Heart failure (pre-LVAD)	iPSC-CVPC	-33.7801781971835	5.6386945932549	2.08837122885524e-09	6.0792486471976e-05
ENST00000228307.11_3	ENSG00000089159.16_8	PXN	Isoform	Heart failure (pre-LVAD)	iPSC-CVPC	-41.749435100327	6.92763518147183	1.67542078279499e-09	4.87714989871622e-05
ENST00000228318.7_2	ENSG00000075415.13_8	SLC25A3	Isoform	Heart failure (pre-LVAD)	iPSC-CVPC	-32.7866257500179	5.72807204630557	1.04136641844541e-08	0.000303141764409459
ENST00000229390.8_3	ENSG00000111786.9_5	SRSF9	Isoform	Heart failure (pre-LVAD)	iPSC-CVPC	-30.5711773628101	6.24381174616969	9.76896163498527e-07	0.0284374473194421
ENST00000233025.11_1	ENSG00000114902.14_5	SPCS1	Isoform	Heart failure (pre-LVAD)	iPSC-CVPC	-48.9646122498209	9.11553345889907	7.80594626603662e-08	0.00227231095804326
ENST00000233838.9_3	ENSG00000115486.12_5	GGCX	Isoform	Heart failure (pre-LVAD)	iPSC-CVPC	59.9618428859682	8.55140928183433	2.35060746307951e-12	6.84261832502445e-08
ENST00000234038.11_2	ENSG00000115685.15_5	PPP1R7	Isoform	Heart failure (pre-LVAD)	iPSC-CVPC	-49.0395131306312	9.69559418421902	4.23860262848951e-07	0.012338572251533
ENST00000234420.11_4	ENSG00000116062.17_8	MSH6	Isoform	Heart failure (pre-LVAD)	iPSC-CVPC	-98.1608873475525	16.4230806603853	2.27272799755202e-09	6.61591120087393e-05
ENST00000234875.9_4	ENSG00000116251.11_7	RPL22	Isoform	Heart failure (pre-LVAD)	iPSC-CVPC	-60.2159477571738	8.14001979775824	1.38752817662401e-13	4.03909452215249e-09
ENST00000237264.9_3	ENSG00000028839.10_6	TBPL1	Isoform	Heart failure (pre-LVAD)	iPSC-CVPC	60.8857954599757	6.33590746869383	7.2802451559171e-22	2.11927936488747e-17
ENST00000237380.12_2	ENSG00000118579.13_5	MED28	Isoform	Heart failure (pre-LVAD)	iPSC-CVPC	51.5844680370365	10.6439407361749	1.25741333673047e-06	0.036603302232224
ENST00000238609.4_4	ENSG00000119632.4_6	IFI27L2	Isoform	Heart failure (pre-LVAD)	iPSC-CVPC	-22.7367040758037	4.37383593774047	2.01071700112783e-07	0.00585319719028311
ENST00000238616.10_3	ENSG00000119638.13_6	NEK9	Isoform	Heart failure (pre-LVAD)	iPSC-CVPC	-34.1608657639792	6.5433520717024	1.78249913683613e-07	0.00518885498732997
ENST00000240123.11_2	ENSG00000120896.13_5	SORBS3	Isoform	Heart failure (pre-LVAD)	iPSC-CVPC	9.58032503302548	1.88745937887763	3.85913402181947e-07	0.0112339391375165
ENST00000242776.9_3	ENSG00000123136.15_6	DDX39A	Isoform	Heart failure (pre-LVAD)	iPSC-CVPC	-49.2559873645378	9.2585826388477	1.03747064779781e-07	0.00302007705573943
ENST00000244711.4_4	ENSG00000124733.5_7	MEA1	Isoform	Heart failure (pre-LVAD)	iPSC-CVPC	42.7521361633894	4.71498712511991	1.22018456727027e-19	3.55195727532376e-15
ENST00000245857.9_2	ENSG00000125691.14_8	RPL23	Isoform	Heart failure (pre-LVAD)	iPSC-CVPC	22.3582582519643	3.37160780840742	3.32666015208162e-11	9.6839077027096e-07
ENST00000246548.9_2	ENSG00000126261.13_6	UBA2	Isoform	Heart failure (pre-LVAD)	iPSC-CVPC	-24.2323284931772	4.55587078844034	1.04382973167905e-07	0.00303858834891771
ENST00000247138.11_3	ENSG00000102100.16_7	SLC35A2	Isoform	Heart failure (pre-LVAD)	iPSC-CVPC	-48.032354459563	8.98443196835491	8.9831867671094e-08	0.00261500566790555
ENST00000247226.13_2	ENSG00000126822.17_9	PLEKHG3	Isoform	Heart failure (pre-LVAD)	iPSC-CVPC	77.1672405570238	2.9419684867403	1.21537060085616e-151	3.53794381909228e-147
ENST00000247461.9_2	ENSG00000127022.15_8	CANX	Isoform	Heart failure (pre-LVAD)	iPSC-CVPC	-70.546865262635	7.92501366091477	5.49495475146419e-19	1.59958132815123e-14
ENST00000247655.4_4	ENSG00000127184.13_7	COX7C	Isoform	Heart failure (pre-LVAD)	iPSC-CVPC	-20.9819616763683	3.88708913756981	6.74405834675081e-08	0.00196319538473916
ENST00000249822.8_2	ENSG00000128989.10_4	ARPP19	Isoform	Heart failure (pre-LVAD)	iPSC-CVPC	-48.3210230991694	7.48630399813172	1.08512258298531e-10	3.15879183907024e-06
ENST00000252816.10_2	ENSG00000130520.11_8	LSM4	Isoform	Heart failure (pre-LVAD)	iPSC-CVPC	37.7733653516883	7.5203987532098	5.09268637054126e-07	0.0148248100246456
ENST00000252818.5_2	ENSG00000130522.6_6	JUND	Isoform	Heart failure (pre-LVAD)	iPSC-CVPC	83.4170923432786	14.3936276063164	6.81511132224607e-09	0.000198387890590583
ENST00000253031.6_2	ENSG00000130733.10_6	YIPF2	Isoform	Heart failure (pre-LVAD)	iPSC-CVPC	56.4060208206301	8.91280702079027	2.47318123636503e-10	7.1994305790586e-06
ENST00000253122.10_2	ENSG00000130821.16_8	SLC6A8	Isoform	Heart failure (pre-LVAD)	iPSC-CVPC	52.1252678470312	10.055137798244	2.17242581561692e-07	0.00632393154926086
ENST00000253410.3_2	ENSG00000131097.7_4	HIGD1B	Isoform	Heart failure (pre-LVAD)	iPSC-CVPC	51.7414557450499	6.50675564130047	1.83584638594617e-15	5.3441488294893e-11
ENST00000253727.10_3	ENSG00000131408.15_10	NR1H2	Isoform	Heart failure (pre-LVAD)	iPSC-CVPC	-108.410425374191	19.9465156127729	5.47792870220985e-08	0.00159462504521329
ENST00000254066.10_2	ENSG00000131759.18_8	RARA	Isoform	Heart failure (pre-LVAD)	iPSC-CVPC	-66.3986854853875	12.5836415325102	1.31611692563743e-07	0.00383121637053056
ENST00000254108.12_2	ENSG00000089280.19_3	FUS	Isoform	Heart failure (pre-LVAD)	iPSC-CVPC	-40.061906298151	7.92265824439953	4.26742735154429e-07	0.0124224810203454
ENST00000254898.7_3	ENSG00000132561.14_8	MATN2	Isoform	Heart failure (pre-LVAD)	iPSC-CVPC	-51.6904177660903	10.7854118939523	1.6461443005181e-06	0.0479192605880819
ENST00000255608.9_3	ENSG00000133243.10_7	BTBD2	Isoform	Heart failure (pre-LVAD)	iPSC-CVPC	-24.539894452803	4.28048096070915	9.86836238899233e-09	0.000287268029143567
ENST00000257868.10_3	ENSG00000135414.10_8	GDF11	Isoform	Heart failure (pre-LVAD)	iPSC-CVPC	83.5378531200479	13.9596111243539	2.17384394621784e-09	6.32805972744013e-05
ENST00000258796.12_2	ENSG00000136295.15_4	TTYH3	Isoform	Heart failure (pre-LVAD)	iPSC-CVPC	-68.8581623958605	12.441325959204	3.11882244285919e-08	0.00090788921311631
ENST00000260447.6_2	ENSG00000137880.6_4	GCHFR	Isoform	Heart failure (pre-LVAD)	iPSC-CVPC	-65.37678508233	11.3386371709609	8.12513804655471e-09	0.000236522768535208
ENST00000261366.10_2	ENSG00000113368.12_4	LMNB1	Isoform	Heart failure (pre-LVAD)	iPSC-CVPC	-88.9414279578515	17.2224887914267	2.41390625859131e-07	0.00702688111875931
ENST00000261819.8_3	ENSG00000089053.13_5	ANAPC5	Isoform	Heart failure (pre-LVAD)	iPSC-CVPC	-55.4282055866362	8.81579445259391	3.22878810641887e-10	9.39900217778533e-06
ENST00000261822.5_2	ENSG00000110987.9_3	BCL7A	Isoform	Heart failure (pre-LVAD)	iPSC-CVPC	-40.9490007093833	3.65045757975377	3.34603270118617e-29	9.74030119315294e-25
ENST00000262177.9_3	ENSG00000105993.15_7	DNAJB6	Isoform	Heart failure (pre-LVAD)	iPSC-CVPC	-59.361618119656	8.45371273935051	2.18779879929327e-12	6.36868230474271e-08
ENST00000262238.10_3	ENSG00000100811.14_7	YY1	Isoform	Heart failure (pre-LVAD)	iPSC-CVPC	-69.2482035886313	12.2167520236519	1.4422210575217e-08	0.000419830549844567
ENST00000262301.16_5	ENSG00000103227.19_8	LMF1	Isoform	Heart failure (pre-LVAD)	iPSC-CVPC	-87.6127242241111	17.558106850181	6.0418985498625e-07	0.0175879666786497
ENST00000262348.9_3	ENSG00000116729.14_9	WLS	Isoform	Heart failure (pre-LVAD)	iPSC-CVPC	-30.827769910774	5.33436110927354	7.51043242044187e-09	0.000218628687759063
ENST00000262713.7_3	ENSG00000129474.16_7	AJUBA	Isoform	Heart failure (pre-LVAD)	iPSC-CVPC	-70.92202767316	12.2275274545194	6.62383623518989e-09	0.000192819872806378
ENST00000262722.11_3	ENSG00000077942.19_9	FBLN1	Isoform	Heart failure (pre-LVAD)	iPSC-CVPC	-38.665801072567	6.90296009602816	2.12705586249303e-08	0.000619185961571721
ENST00000262990.9_2	ENSG00000109445.11_6	ZNF330	Isoform	Heart failure (pre-LVAD)	iPSC-CVPC	-47.44515223765	9.18886893380166	2.42596370291487e-07	0.00706198033918519
ENST00000263461.11_2	ENSG00000120008.16_4	WDR11	Isoform	Heart failure (pre-LVAD)	iPSC-CVPC	-60.0485860792359	11.4752587768145	1.66894291273946e-07	0.00485829281898457
ENST00000263593.8_3	ENSG00000110013.13_5	SIAE	Isoform	Heart failure (pre-LVAD)	iPSC-CVPC	27.9299908875996	5.57683215263089	5.49363058715019e-07	0.0159919586391942
ENST00000263645.10_2	ENSG00000110651.12_6	CD81	Isoform	Heart failure (pre-LVAD)	iPSC-CVPC	-36.7968957837408	6.21333155686441	3.17568542947587e-09	9.24442028520426e-05
ENST00000264126.9_3	ENSG00000121957.14_7	GPSM2	Isoform	Heart failure (pre-LVAD)	iPSC-CVPC	77.5580822628096	15.4847205132831	5.48032759518903e-07	0.0159532336295953
ENST00000264211.12_2	ENSG00000075151.20_5	EIF4G3	Isoform	Heart failure (pre-LVAD)	iPSC-CVPC	39.1970001512005	8.01540395641546	1.00728995766918e-06	0.0293222106677498
ENST00000264331.8_3	ENSG00000077097.15_9	TOP2B	Isoform	Heart failure (pre-LVAD)	iPSC-CVPC	35.9517235245377	7.41007587162001	1.22386158780722e-06	0.0356266108210682
ENST00000264658.11_4	ENSG00000108306.13_10	FBXL20	Isoform	Heart failure (pre-LVAD)	iPSC-CVPC	76.6859432063743	13.2909235132387	7.93666359671958e-09	0.000231036277300507
ENST00000265393.10_2	ENSG00000106052.13_5	TAX1BP1	Isoform	Heart failure (pre-LVAD)	iPSC-CVPC	-37.15190063526	6.79590052814934	4.58205343701492e-08	0.00133383575551504
ENST00000265758.7_3	ENSG00000071462.12_7	BUD23	Isoform	Heart failure (pre-LVAD)	iPSC-CVPC	-41.0889125664583	7.1155608114863	7.71750596053253e-09	0.000224656598511102
ENST00000267115.10_2	ENSG00000139644.13_9	TMBIM6	Isoform	Heart failure (pre-LVAD)	iPSC-CVPC	83.6107152693779	10.1525491549721	1.78898029759798e-16	5.20772164630772e-12
ENST00000268489.10_3	ENSG00000140836.17_10	ZFHX3	Isoform	Heart failure (pre-LVAD)	iPSC-CVPC	-89.4598710558393	17.3508691484331	2.52374837882753e-07	0.00734663153076694
ENST00000268758.13_2	ENSG00000087111.21_6	PIGS	Isoform	Heart failure (pre-LVAD)	iPSC-CVPC	56.4438243178274	10.2381708378644	3.52613838884085e-08	0.00102645888499157
ENST00000269571.9_1	ENSG00000141736.13_6	ERBB2	Isoform	Heart failure (pre-LVAD)	iPSC-CVPC	-43.8116028735426	8.23412079745709	1.03346910758605e-07	0.00300842857218299
ENST00000271526.9_2	ENSG00000143294.15_4	PRCC	Isoform	Heart failure (pre-LVAD)	iPSC-CVPC	-44.0025055843702	7.87946475084369	2.3443604605346e-08	0.000682443330061622
ENST00000272249.7_4	ENSG00000143889.16_9	HNRNPLL	Isoform	Heart failure (pre-LVAD)	iPSC-CVPC	43.9643829313598	8.27985560544239	1.09745188633707e-07	0.00319468244112721
ENST00000273048.2_1	ENSG00000144567.11_8	RETREG2	Isoform	Heart failure (pre-LVAD)	iPSC-CVPC	-58.9839734869356	7.66508648189917	1.41330694385095e-14	4.11413651355012e-10
ENST00000280346.11_2	ENSG00000150768.16_3	DLAT	Isoform	Heart failure (pre-LVAD)	iPSC-CVPC	-76.0936811601096	14.0794487276212	6.49559433125132e-08	0.00189086750982726
ENST00000284031.13_3	ENSG00000153904.20_7	DDAH1	Isoform	Heart failure (pre-LVAD)	iPSC-CVPC	-88.8402456459167	17.7295314008024	5.41865969887027e-07	0.0157737183834114
ENST00000287543.4_1	ENSG00000156928.5_4	MALSU1	Isoform	Heart failure (pre-LVAD)	iPSC-CVPC	-48.2653053337848	6.8043657087625	1.30965339003224e-12	3.81240101838385e-08
ENST00000290349.11_2	ENSG00000159228.13_4	CBR1	Isoform	Heart failure (pre-LVAD)	iPSC-CVPC	55.202187739265	10.8559588551575	3.67690848580561e-07	0.0107034806021801
ENST00000290573.7_2	ENSG00000159399.10_5	HK2	Isoform	Heart failure (pre-LVAD)	iPSC-CVPC	-101.262346637459	18.6213972256932	5.38951514400961e-08	0.0015688878584212
ENST00000293195.10_4	ENSG00000161513.12_6	FDXR	Isoform	Heart failure (pre-LVAD)	iPSC-CVPC	-84.4575946654622	15.3561701973933	3.79979450470541e-08	0.00110612018031975
ENST00000293379.9_3	ENSG00000161638.11_6	ITGA5	Isoform	Heart failure (pre-LVAD)	iPSC-CVPC	-41.1592587336632	7.74949643412863	1.08895453235979e-07	0.00316994664369935
ENST00000294189.11_5	ENSG00000162244.12_9	RPL29	Isoform	Heart failure (pre-LVAD)	iPSC-CVPC	-22.414911090554	4.01434615652788	2.3545254321481e-08	0.000685402353298312
ENST00000295694.9_4	ENSG00000163472.19_6	TMEM79	Isoform	Heart failure (pre-LVAD)	iPSC-CVPC	-82.1073341840456	16.4268982237365	5.78239201082759e-07	0.0168325431435191
ENST00000295713.5	ENSG00000163486.8	SRGAP2	Isoform	Heart failure (pre-LVAD)	iPSC-CVPC	-37.5271904393807	6.05511288595215	5.73292418888088e-10	1.66885423138322e-05
ENST00000296555.11_4	ENSG00000109670.16_8	FBXW7	Isoform	Heart failure (pre-LVAD)	iPSC-CVPC	40.1696810375806	7.35912696633565	4.80215571726221e-08	0.00139790752929503
ENST00000297156.4_2	ENSG00000164615.5_4	CAMLG	Isoform	Heart failure (pre-LVAD)	iPSC-CVPC	-70.0520711860803	13.5028821988263	2.12639127643145e-07	0.00618992500569195
ENST00000297268.11_2	ENSG00000164692.18_4	COL1A2	Isoform	Heart failure (pre-LVAD)	iPSC-CVPC	-50.1314605326219	7.94801681805508	2.8372968863043e-10	8.25937123603182e-06
ENST00000298295.4_3	ENSG00000165507.9_9	DEPP1	Isoform	Heart failure (pre-LVAD)	iPSC-CVPC	-21.3906243750763	4.18369167864613	3.17319668010602e-07	0.00923717553578862
ENST00000298307.10_2	ENSG00000165516.11_4	KLHDC2	Isoform	Heart failure (pre-LVAD)	iPSC-CVPC	5.63866605375878	0.901994579125391	4.0697111498982e-10	1.18469291573537e-05
ENST00000298569.9_4	ENSG00000122203.15_6	KIAA1191	Isoform	Heart failure (pre-LVAD)	iPSC-CVPC	-44.3913840268658	7.55468863847747	4.20287041505494e-09	0.000122345557782249
ENST00000299427.12_5	ENSG00000166340.17_7	TPP1	Isoform	Heart failure (pre-LVAD)	iPSC-CVPC	-60.5289648517673	8.26242139648216	2.37452405409328e-13	6.91223952146554e-09
ENST00000299638.8_5	ENSG00000255529.9_8	POLR2M	Isoform	Heart failure (pre-LVAD)	iPSC-CVPC	121.318423048409	22.0815164034532	3.92671278797415e-08	0.00114306609257928
ENST00000300027.12_4	ENSG00000140525.18_7	FANCI	Isoform	Heart failure (pre-LVAD)	iPSC-CVPC	69.7687993675186	10.7459222689206	8.43766327954468e-11	2.45620378067546e-06
ENST00000300408.7_2	ENSG00000167085.11_8	PHB	Isoform	Heart failure (pre-LVAD)	iPSC-CVPC	-66.8184658034762	12.7989787696953	1.78335551796147e-07	0.00519134791278584
ENST00000300527.9_2	ENSG00000142173.16_6	COL6A2	Isoform	Heart failure (pre-LVAD)	iPSC-CVPC	-30.8632003723576	5.84439573728217	1.28607175192768e-07	0.00374375486986148
ENST00000300875.4_3	ENSG00000197380.11_5	DACT3	Isoform	Heart failure (pre-LVAD)	iPSC-CVPC	134.703701026266	18.5649791957069	3.99306640332989e-13	1.16238163000933e-08
ENST00000301057.8_5	ENSG00000167543.16_8	TP53I13	Isoform	Heart failure (pre-LVAD)	iPSC-CVPC	-35.8379069516594	6.52926979451936	4.04655647478435e-08	0.00117795258980972
ENST00000301244.12_3	ENSG00000167642.13_7	SPINT2	Isoform	Heart failure (pre-LVAD)	iPSC-CVPC	-128.166406941609	18.8579514626414	1.07256795838498e-11	3.12224532685868e-07
ENST00000301599.7_2	ENSG00000167874.7_4	TMEM88	Isoform	Heart failure (pre-LVAD)	iPSC-CVPC	-40.8922177209782	7.72331680004227	1.19248087459034e-07	0.00347131182593248
ENST00000301935.9_2	ENSG00000162191.13_7	UBXN1	Isoform	Heart failure (pre-LVAD)	iPSC-CVPC	-42.5671117284492	8.32703442351705	3.18905359409283e-07	0.00928333501240423
ENST00000302424.12_2	ENSG00000171206.14_4	TRIM8	Isoform	Heart failure (pre-LVAD)	iPSC-CVPC	-25.368150197609	4.9643929310604	3.22123669098131e-07	0.00937702000744659
ENST00000303400.9_3	ENSG00000090316.16_5	MAEA	Isoform	Heart failure (pre-LVAD)	iPSC-CVPC	-29.3275801832382	5.28958257993894	2.94957943569298e-08	0.000858622573730226
ENST00000303887.10_2	ENSG00000166508.18_5	MCM7	Isoform	Heart failure (pre-LVAD)	iPSC-CVPC	-38.129587026691	7.87050179684586	1.26854505206524e-06	0.0369273464656191
ENST00000304330.9_4	ENSG00000103932.12_7	RPAP1	Isoform	Heart failure (pre-LVAD)	iPSC-CVPC	-53.9976790736163	9.16944230339358	3.88838649479528e-09	0.000113190930863491
ENST00000304593.14_5	ENSG00000168958.20_8	MFF	Isoform	Heart failure (pre-LVAD)	iPSC-CVPC	-32.4938898342885	6.7163912388355	1.31153220003188e-06	0.038178702342928
ENST00000304858.7_2	ENSG00000170606.15_5	HSPA4	Isoform	Heart failure (pre-LVAD)	iPSC-CVPC	-44.6320639205875	7.48081087570161	2.42832642162121e-09	7.06885821333934e-05
ENST00000304920.3_1	ENSG00000172458.4_4	IL17D	Isoform	Heart failure (pre-LVAD)	iPSC-CVPC	-58.037272999299	8.17170161015854	1.22763109239106e-12	3.57363410995038e-08
ENST00000305476.10_3	ENSG00000168758.11_6	SEMA4C	Isoform	Heart failure (pre-LVAD)	iPSC-CVPC	-52.3362858186287	8.75304240843622	2.24221229574249e-09	6.52707999290639e-05
ENST00000306107.9_5	ENSG00000170017.12_6	ALCAM	Isoform	Heart failure (pre-LVAD)	iPSC-CVPC	-85.1260631467434	16.4050136020906	2.11395426534881e-07	0.00615372086643039
ENST00000306802.8_2	ENSG00000138688.15_4	KIAA1109	Isoform	Heart failure (pre-LVAD)	iPSC-CVPC	36.9232179568512	7.22141698437949	3.17056042558692e-07	0.00922950139888352
ENST00000307296.8_2	ENSG00000170248.15_5	PDCD6IP	Isoform	Heart failure (pre-LVAD)	iPSC-CVPC	-47.4580252213273	8.52659923058166	2.60833211703552e-08	0.00075928547926904
ENST00000308360.8_3	ENSG00000087111.21_6	PIGS	Isoform	Heart failure (pre-LVAD)	iPSC-CVPC	-53.7518851275942	11.213383379928	1.6385769345412e-06	0.0476989745644943
ENST00000309268.11_4	ENSG00000156508.18_7	EEF1A1	Isoform	Heart failure (pre-LVAD)	iPSC-CVPC	-13.357852328305	2.68516278128736	6.53521512033674e-07	0.0190240112153003
ENST00000309311.7_3	ENSG00000167658.16_5	EEF2	Isoform	Heart failure (pre-LVAD)	iPSC-CVPC	-41.6847260486223	6.75495132620843	6.78644161733872e-10	1.9755331548073e-05
ENST00000309784.9_3	ENSG00000213186.8_6	TRIM59	Isoform	Heart failure (pre-LVAD)	iPSC-CVPC	-70.8450946760426	12.4534565000438	1.27942937626843e-08	0.00037244189143174
ENST00000310137.5_2	ENSG00000239306.5_4	RBM14	Isoform	Heart failure (pre-LVAD)	iPSC-CVPC	-84.8714014328079	16.3044927350634	1.93579493517273e-07	0.00563509905628782
ENST00000310441.12_3	ENSG00000172534.14_7	HCFC1	Isoform	Heart failure (pre-LVAD)	iPSC-CVPC	-60.3249583312273	9.49759472209858	2.13081614492097e-10	6.20280579786494e-06
ENST00000310546.3_2	ENSG00000175093.5_4	SPSB4	Isoform	Heart failure (pre-LVAD)	iPSC-CVPC	-88.0113436718848	15.8011383612836	2.54831603600572e-08	0.000741814798081265
ENST00000311160.14_3	ENSG00000136205.17_7	TNS3	Isoform	Heart failure (pre-LVAD)	iPSC-CVPC	-45.7252201709866	7.76569579533143	3.90652583828165e-09	0.000113718967152379
ENST00000311191.10_1	ENSG00000136141.15_5	LRCH1	Isoform	Heart failure (pre-LVAD)	iPSC-CVPC	50.8939768740323	8.79889853193556	7.28883681087331e-09	0.000212178039564522
ENST00000313244.14_3	ENSG00000125733.18_7	TRIP10	Isoform	Heart failure (pre-LVAD)	iPSC-CVPC	29.0667132326212	4.87814256481518	2.54467643945355e-09	7.40755311524928e-05
ENST00000313285.12_2	ENSG00000125733.18_7	TRIP10	Isoform	Heart failure (pre-LVAD)	iPSC-CVPC	-49.854021617452	8.71618154768336	1.06706676969269e-08	0.000310623136657542
ENST00000314214.12_2	ENSG00000029534.21_9	ANK1	Isoform	Heart failure (pre-LVAD)	iPSC-CVPC	61.2412118963245	7.91222981262636	9.93621638176366e-15	2.8924325887314e-10
ENST00000315554.13_6	ENSG00000070831.17_9	CDC42	Isoform	Heart failure (pre-LVAD)	iPSC-CVPC	-19.2325735772873	3.57850755629566	7.68092141039248e-08	0.00223591622256525
ENST00000316967.10_2	ENSG00000225151.10_6	GOLGA2P7	Isoform	Heart failure (pre-LVAD)	iPSC-CVPC	-42.0498979113188	8.45472041739326	6.57408910747459e-07	0.0191371733918585
ENST00000317091.10_4	ENSG00000172831.14_7	CES2	Isoform	Heart failure (pre-LVAD)	iPSC-CVPC	50.4811934990254	8.89825638363544	1.40190741632118e-08	0.000408095248891096
ENST00000317702.10_2	ENSG00000176014.13_5	TUBB6	Isoform	Heart failure (pre-LVAD)	iPSC-CVPC	-33.1835282103778	4.2704643758037	7.81935682869808e-15	2.27621477283401e-10
ENST00000318204.5_1	ENSG00000112183.15_4	RBM24	Isoform	Heart failure (pre-LVAD)	iPSC-CVPC	79.2165049146685	15.0390855912687	1.38388257045273e-07	0.0040284821625879
ENST00000318443.10_2	ENSG00000103855.18_4	CD276	Isoform	Heart failure (pre-LVAD)	iPSC-CVPC	-64.0800109019905	7.91818215633517	5.83239059138851e-16	1.6978089011532e-11
ENST00000319033.7_2	ENSG00000119523.10_5	ALG2	Isoform	Heart failure (pre-LVAD)	iPSC-CVPC	66.546536810779	13.6711724237369	1.12930836751564e-06	0.0328741665783803
ENST00000319332.10_3	ENSG00000090530.10_6	P3H2	Isoform	Heart failure (pre-LVAD)	iPSC-CVPC	-119.181993828684	18.0516799562593	4.04919960846742e-11	1.17872200602487e-06
ENST00000320394.10_4	ENSG00000174628.16_5	IQCK	Isoform	Heart failure (pre-LVAD)	iPSC-CVPC	76.5936079687421	5.59165992894574	1.04603757117196e-42	3.04501536968158e-38
ENST00000321030.9_2	ENSG00000105618.14_5	PRPF31	Isoform	Heart failure (pre-LVAD)	iPSC-CVPC	-34.5619151279533	6.93189938741161	6.16667693239813e-07	0.017951196550211
ENST00000321337.12_2	ENSG00000161956.13_6	SENP3	Isoform	Heart failure (pre-LVAD)	iPSC-CVPC	-74.0075741263139	10.5257343988869	2.04899988399073e-12	5.96463866229702e-08
ENST00000321562.9_2	ENSG00000141756.19_8	FKBP10	Isoform	Heart failure (pre-LVAD)	iPSC-CVPC	-51.8493400240217	9.1430192507585	1.42031871811223e-08	0.00041345477884247
ENST00000321765.10_4	ENSG00000076382.17_8	SPAG5	Isoform	Heart failure (pre-LVAD)	iPSC-CVPC	-98.3427064036195	15.4883951638795	2.16093724807813e-10	6.29048832915544e-06
ENST00000321944.8_1	ENSG00000130669.17_5	PAK4	Isoform	Heart failure (pre-LVAD)	iPSC-CVPC	41.6553690898922	6.82957362387982	1.06558292439891e-09	3.10191189292523e-05
ENST00000322680.7_3	ENSG00000148660.20_5	CAMK2G	Isoform	Heart failure (pre-LVAD)	iPSC-CVPC	-53.0352161167263	10.7325252279578	7.75074138986776e-07	0.0225624081859051
ENST00000322776.11_3	ENSG00000167792.13_7	NDUFV1	Isoform	Heart failure (pre-LVAD)	iPSC-CVPC	-28.551092432718	5.50008914357417	2.09141135476838e-07	0.00608809845373076
ENST00000323701.11_3	ENSG00000168883.20_6	USP39	Isoform	Heart failure (pre-LVAD)	iPSC-CVPC	-48.7187093335283	9.45886933803491	2.59675385163301e-07	0.00755915046210369
ENST00000325385.11_1	ENSG00000144535.19_8	DIS3L2	Isoform	Heart failure (pre-LVAD)	iPSC-CVPC	-118.468091693976	17.6625700522464	1.98263361438573e-11	5.77144645147686e-07
ENST00000325542.10_2	ENSG00000166037.11_6	CEP57	Isoform	Heart failure (pre-LVAD)	iPSC-CVPC	-81.1672814333047	14.3639963443509	1.59753873465735e-08	0.000465043525658755
ENST00000325680.12_2	ENSG00000119596.18_7	YLPM1	Isoform	Heart failure (pre-LVAD)	iPSC-CVPC	-47.2871292240246	9.48157568382585	6.12400843799418e-07	0.0178269885630011
ENST00000325954.9_4	ENSG00000022840.16_7	RNF10	Isoform	Heart failure (pre-LVAD)	iPSC-CVPC	-55.7047642150313	8.74486423697396	1.89031156375161e-10	5.50269696208094e-06
ENST00000326587.12_3	ENSG00000179222.18_5	MAGED1	Isoform	Heart failure (pre-LVAD)	iPSC-CVPC	-61.1111450854671	6.76689082787604	1.70258566977232e-19	4.95622688470722e-15
ENST00000326739.9_3	ENSG00000178035.12_5	IMPDH2	Isoform	Heart failure (pre-LVAD)	iPSC-CVPC	-28.9476434865717	4.16555097066621	3.67115565348366e-12	1.06867341072909e-07
ENST00000326932.8_2	ENSG00000050165.18_5	DKK3	Isoform	Heart failure (pre-LVAD)	iPSC-CVPC	-50.945959266182	10.1495690016391	5.1800893942748e-07	0.0150792402267339
ENST00000327064.9_2	ENSG00000142453.12_8	CARM1	Isoform	Heart failure (pre-LVAD)	iPSC-CVPC	60.5581348196554	11.1737038762279	5.96987736536573e-08	0.00173783130105796
ENST00000327141.9_3	ENSG00000104964.15_5	TLE5	Isoform	Heart failure (pre-LVAD)	iPSC-CVPC	48.3113013533646	7.13170151568983	1.25129407583791e-11	3.64251705476416e-07
ENST00000327858.11_4	ENSG00000077942.19_9	FBLN1	Isoform	Heart failure (pre-LVAD)	iPSC-CVPC	44.5473554604785	6.89628156080589	1.04966508274418e-10	3.05557505586831e-06
ENST00000329138.9_2	ENSG00000185359.13_6	HGS	Isoform	Heart failure (pre-LVAD)	iPSC-CVPC	-43.3640446180158	8.28483835636547	1.65750370063432e-07	0.00482499327254651
ENST00000329276.10_2	ENSG00000101361.17_6	NOP56	Isoform	Heart failure (pre-LVAD)	iPSC-CVPC	-49.0250817168869	8.49955908924073	8.02388102685406e-09	0.000233575176691722
ENST00000330062.8_3	ENSG00000182054.10_4	IDH2	Isoform	Heart failure (pre-LVAD)	iPSC-CVPC	-33.4555583103679	6.37416583355135	1.53244889000568e-07	0.00446095871880653
ENST00000330883.9_3	ENSG00000055118.15_5	KCNH2	Isoform	Heart failure (pre-LVAD)	iPSC-CVPC	-48.3805849691692	7.29996709134623	3.41402827523806e-11	9.93823630921799e-07
ENST00000332674.9_5	ENSG00000119950.21_7	MXI1	Isoform	Heart failure (pre-LVAD)	iPSC-CVPC	-31.7411785851814	5.75580243518067	3.49494521506527e-08	0.0010173785521055
ENST00000333244.6_4	ENSG00000185567.7_5	AHNAK2	Isoform	Heart failure (pre-LVAD)	iPSC-CVPC	-46.7930750684171	9.25050906827837	4.22716980436456e-07	0.0123052913005052
ENST00000334444.11_3	ENSG00000114770.17_7	ABCC5	Isoform	Heart failure (pre-LVAD)	iPSC-CVPC	-45.0210588543783	8.7753148040736	2.89094957701955e-07	0.00841555421870391
ENST00000334746.10_4	ENSG00000011114.15_8	BTBD7	Isoform	Heart failure (pre-LVAD)	iPSC-CVPC	-64.5823546509268	11.5754328523446	2.41543347403607e-08	0.0007031326842919
ENST00000335025.12_1	ENSG00000100023.19_5	PPIL2	Isoform	Heart failure (pre-LVAD)	iPSC-CVPC	25.815465052289	3.5507640661557	3.58432046552613e-13	1.04339568751466e-08
ENST00000335181.10_6	ENSG00000067225.18_7	PKM	Isoform	Heart failure (pre-LVAD)	iPSC-CVPC	-35.3396424976302	3.23642691793046	9.31714506753225e-28	2.71222092915864e-23
ENST00000335295.4_4	ENSG00000244734.4_6	HBB	Isoform	Heart failure (pre-LVAD)	iPSC-CVPC	95.809480199684	19.0020149655326	4.60523941743371e-07	0.0134058519441495
ENST00000335350.10_3	ENSG00000107731.12_4	UNC5B	Isoform	Heart failure (pre-LVAD)	iPSC-CVPC	-61.3920017231475	11.3356149052214	6.09978705710121e-08	0.00177564801232216
ENST00000335972.11_2	ENSG00000130985.17_8	UBA1	Isoform	Heart failure (pre-LVAD)	iPSC-CVPC	-57.1817355576848	8.60797052153996	3.07607347976319e-11	8.95444989959065e-07
ENST00000336216.9_2	ENSG00000140382.15_7	HMG20A	Isoform	Heart failure (pre-LVAD)	iPSC-CVPC	-41.4781770773088	8.4375704591786	8.83795429736613e-07	0.0257272849596328
ENST00000337138.9_4	ENSG00000100644.17_8	HIF1A	Isoform	Heart failure (pre-LVAD)	iPSC-CVPC	-35.677988418184	6.92945863472753	2.62240561040458e-07	0.00763382273188773
ENST00000337195.9_2	ENSG00000175029.17_7	CTBP2	Isoform	Heart failure (pre-LVAD)	iPSC-CVPC	66.6672537132359	8.74947929297101	2.54525812364539e-14	7.40924639793173e-10
ENST00000337682.9_3	ENSG00000139146.14_9	SINHCAF	Isoform	Heart failure (pre-LVAD)	iPSC-CVPC	-97.7058155715055	12.0254698472819	4.47708186957795e-16	1.30327853223414e-11
ENST00000338010.9_3	ENSG00000161642.17_5	ZNF385A	Isoform	Heart failure (pre-LVAD)	iPSC-CVPC	-72.1125501669806	14.4492335737265	6.01444879041188e-07	0.017508060428889
ENST00000338327.4_2	ENSG00000273173.5_8	SNURF	Isoform	Heart failure (pre-LVAD)	iPSC-CVPC	94.6767573024953	18.6276574874974	3.72321572909776e-07	0.0108382809874036
ENST00000338447.10_1	ENSG00000110583.13_5	NAA40	Isoform	Heart failure (pre-LVAD)	iPSC-CVPC	29.8450443533035	5.05141942005097	3.45762871744893e-09	0.000100651571964938
ENST00000338588.8_4	ENSG00000189320.9_7	FAM180A	Isoform	Heart failure (pre-LVAD)	iPSC-CVPC	50.9655389071235	5.52550365840656	2.8704512250284e-20	8.35588351605767e-16
ENST00000339296.10_2	ENSG00000172888.12_4	ZNF621	Isoform	Heart failure (pre-LVAD)	iPSC-CVPC	50.1784920211629	9.39314505891688	9.1909855825247e-08	0.00267549590307294
ENST00000340296.8_2	ENSG00000077380.15_7	DYNC1I2	Isoform	Heart failure (pre-LVAD)	iPSC-CVPC	-51.7474732843358	9.7714677214793	1.18514098077264e-07	0.00344994539502916
ENST00000340811.9_3	ENSG00000057294.15_7	PKP2	Isoform	Heart failure (pre-LVAD)	iPSC-CVPC	-41.2621492982624	4.85575118013617	1.93578868198685e-17	5.63508085326372e-13
ENST00000342115.8_3	ENSG00000116337.19_10	AMPD2	Isoform	Heart failure (pre-LVAD)	iPSC-CVPC	-53.3715667063044	9.32230979650396	1.0334599714603e-08	0.000300840197692093
ENST00000342220.9_1	ENSG00000182871.16_6	COL18A1	Isoform	Heart failure (pre-LVAD)	iPSC-CVPC	39.0677987182667	6.08780395582954	1.3863247862425e-10	4.03559145275192e-06
ENST00000343523.6_2	ENSG00000198947.15_8	DMD	Isoform	Heart failure (pre-LVAD)	iPSC-CVPC	23.6414787854498	4.37190618037715	6.38782305016203e-08	0.00185949528990217
ENST00000343526.9_2	ENSG00000122779.18_5	TRIM24	Isoform	Heart failure (pre-LVAD)	iPSC-CVPC	-17.9891346929584	3.5314355108641	3.50585611690723e-07	0.0102055471563169
ENST00000343605.5_2	ENSG00000100036.13_5	SLC35E4	Isoform	Heart failure (pre-LVAD)	iPSC-CVPC	-36.8133926952964	6.02197660854401	9.76685874658384e-10	2.84313258113056e-05
ENST00000343730.10_4	ENSG00000148297.16_7	MED22	Isoform	Heart failure (pre-LVAD)	iPSC-CVPC	-36.5157535639607	7.24206560577009	4.60272908134142e-07	0.0133985443557849
ENST00000344423.10_3	ENSG00000186918.14_7	ZNF395	Isoform	Heart failure (pre-LVAD)	iPSC-CVPC	59.4336424115254	11.8600114032733	5.40738071630693e-07	0.0157408852651695
ENST00000344989.10_3	ENSG00000188529.15_6	SRSF10	Isoform	Heart failure (pre-LVAD)	iPSC-CVPC	-15.8130624481285	3.29517367419961	1.59574833342309e-06	0.0464522339859462
ENST00000346246.9_1	ENSG00000179361.17_4	ARID3B	Isoform	Heart failure (pre-LVAD)	iPSC-CVPC	-106.780275208549	20.0076845578829	9.45162394084986e-08	0.00275136772918139
ENST00000350030.8_3	ENSG00000132780.17_7	NASP	Isoform	Heart failure (pre-LVAD)	iPSC-CVPC	-69.2037727731445	8.73030300978042	2.24780661114174e-15	6.54336504503361e-11
ENST00000351948.8_2	ENSG00000163029.16_5	SMC6	Isoform	Heart failure (pre-LVAD)	iPSC-CVPC	-92.4365223530551	19.2135988276916	1.50180991224955e-06	0.0437176865455844
ENST00000352301.8_3	ENSG00000138668.19_8	HNRNPD	Isoform	Heart failure (pre-LVAD)	iPSC-CVPC	-26.3583076252832	4.6220208846095	1.17878144754268e-08	0.000343143279379674
ENST00000352397.10_3	ENSG00000100243.21_6	CYB5R3	Isoform	Heart failure (pre-LVAD)	iPSC-CVPC	-16.4650673877865	2.4419990508194	1.55733064852909e-11	4.53338951786818e-07
ENST00000352410.9_2	ENSG00000178802.18_6	MPI	Isoform	Heart failure (pre-LVAD)	iPSC-CVPC	45.0544890350717	3.9579933982817	5.07251958034607e-30	1.47661044983874e-25
ENST00000352456.7_1	ENSG00000105323.17_6	HNRNPUL1	Isoform	Heart failure (pre-LVAD)	iPSC-CVPC	47.237966099696	9.06637066656085	1.88596618168408e-07	0.00549004755488236
ENST00000352966.9_1	ENSG00000171033.13_4	PKIA	Isoform	Heart failure (pre-LVAD)	iPSC-CVPC	-39.7867749235599	7.81951834630419	3.61599509072829e-07	0.0105261617091101
ENST00000354064.11_1	ENSG00000149582.16_6	TMEM25	Isoform	Heart failure (pre-LVAD)	iPSC-CVPC	56.841935393152	11.4432405200283	6.78937581427861e-07	0.019763872995365
ENST00000354161.8_2	ENSG00000146828.18_7	SLC12A9	Isoform	Heart failure (pre-LVAD)	iPSC-CVPC	-80.4884301268441	14.5091867004339	2.89929718306788e-08	0.00084398540999106
ENST00000354449.7_1	ENSG00000197548.12_4	ATG7	Isoform	Heart failure (pre-LVAD)	iPSC-CVPC	38.4095299650164	6.7003093553445	9.89604611742637e-09	0.000288073902478282
ENST00000354667.8_4	ENSG00000122566.21_7	HNRNPA2B1	Isoform	Heart failure (pre-LVAD)	iPSC-CVPC	4.71296252883324	0.916599218531786	2.72130298398161e-07	0.00792171298637047
ENST00000354777.6_2	ENSG00000116729.14_9	WLS	Isoform	Heart failure (pre-LVAD)	iPSC-CVPC	15.3885655239172	3.00938691018585	3.16207270107361e-07	0.00920479363282528
ENST00000355059.9_2	ENSG00000140398.14_5	NEIL1	Isoform	Heart failure (pre-LVAD)	iPSC-CVPC	19.3721352884643	3.76069511474747	2.58809350253313e-07	0.00753394018587394
ENST00000356187.9_2	ENSG00000023191.17_5	RNH1	Isoform	Heart failure (pre-LVAD)	iPSC-CVPC	-34.0262712627721	6.24711035811448	5.13066563439328e-08	0.00149353676617188
ENST00000356219.7_2	ENSG00000196498.13_9	NCOR2	Isoform	Heart failure (pre-LVAD)	iPSC-CVPC	17.8074228750865	3.42118206794873	1.93944638035855e-07	0.00564572841322374
ENST00000356327.9_3	ENSG00000075651.16_6	PLD1	Isoform	Heart failure (pre-LVAD)	iPSC-CVPC	-80.183162001959	15.5149480927557	2.36456524773346e-07	0.0068832494361521
ENST00000356537.9_3	ENSG00000147419.19_5	CCDC25	Isoform	Heart failure (pre-LVAD)	iPSC-CVPC	-73.7780398847592	11.9492508555553	6.64649796224242e-10	1.93479555680877e-05
ENST00000357214.6_3	ENSG00000116560.11_5	SFPQ	Isoform	Heart failure (pre-LVAD)	iPSC-CVPC	-57.1311865221627	7.69535566012886	1.13538585453874e-13	3.30510822256227e-09
ENST00000357231.8_2	ENSG00000182473.22_6	EXOC7	Isoform	Heart failure (pre-LVAD)	iPSC-CVPC	18.3500687492893	3.22707818694611	1.29836787124727e-08	0.00037795488732008
ENST00000357308.9_3	ENSG00000198380.13_4	GFPT1	Isoform	Heart failure (pre-LVAD)	iPSC-CVPC	31.1982992387146	5.69758322519482	4.3576697152202e-08	0.0012685176541006
ENST00000357750.9_3	ENSG00000068001.14_8	HYAL2	Isoform	Heart failure (pre-LVAD)	iPSC-CVPC	82.939434955541	16.0806291375625	2.49970704404902e-07	0.0072766472052267
ENST00000357867.8_3	ENSG00000115414.20_8	FN1	Isoform	Heart failure (pre-LVAD)	iPSC-CVPC	9.52035645078661	1.79360712002545	1.10871979645747e-07	0.0032274833274877
ENST00000358077.9_1	ENSG00000196730.13_5	DAPK1	Isoform	Heart failure (pre-LVAD)	iPSC-CVPC	121.882648619554	24.9906141067252	1.07636682473545e-06	0.0313330382680489
ENST00000358173.8_3	ENSG00000196411.10_5	EPHB4	Isoform	Heart failure (pre-LVAD)	iPSC-CVPC	-106.69865256213	14.3564816997714	1.06895672624095e-13	3.11173303008741e-09
ENST00000358252.8_4	ENSG00000149115.14_8	TNKS1BP1	Isoform	Heart failure (pre-LVAD)	iPSC-CVPC	-41.1030189198896	7.5719552675448	5.68860224893026e-08	0.0016559521146636
ENST00000358372.8_3	ENSG00000146457.16_6	WTAP	Isoform	Heart failure (pre-LVAD)	iPSC-CVPC	7.65232114241674	0.862902605526553	7.43932386281259e-19	2.16558717646475e-14
ENST00000358435.8_2	ENSG00000196683.10_4	TOMM7	Isoform	Heart failure (pre-LVAD)	iPSC-CVPC	-111.371163814136	16.8054722458302	3.42398331704208e-11	9.96721543590949e-07
ENST00000358784.11_2	ENSG00000069966.18_4	GNB5	Isoform	Heart failure (pre-LVAD)	iPSC-CVPC	-48.5237291944437	9.29556351880931	1.78830900904774e-07	0.00520576752533797
ENST00000359794.11_4	ENSG00000152556.17_10	PFKM	Isoform	Heart failure (pre-LVAD)	iPSC-CVPC	-61.1245541119871	8.50466349375677	6.61428034549561e-13	1.92541700857377e-08
ENST00000360240.10_2	ENSG00000047849.21_9	MAP4	Isoform	Heart failure (pre-LVAD)	iPSC-CVPC	-16.9651317132109	3.00773546439601	1.69557125776817e-08	0.000493580793136314
ENST00000360595.7_3	ENSG00000116604.18_7	MEF2D	Isoform	Heart failure (pre-LVAD)	iPSC-CVPC	-62.3027098647799	7.42072444442047	4.62843351143584e-17	1.34733699517897e-12
ENST00000360620.7_2	ENSG00000196411.10_5	EPHB4	Isoform	Heart failure (pre-LVAD)	iPSC-CVPC	70.7819400984553	12.14374479382	5.58692325957212e-09	0.000162635336086144
ENST00000360635.7_2	ENSG00000119185.12_6	ITGB1BP1	Isoform	Heart failure (pre-LVAD)	iPSC-CVPC	11.6514934437399	1.70827338389684	9.06447973032238e-12	2.63867004949684e-07
ENST00000361204.9_4	ENSG00000198911.12_6	SREBF2	Isoform	Heart failure (pre-LVAD)	iPSC-CVPC	-33.5178508747224	6.17497025140948	5.69832320801221e-08	0.00165878188585235
ENST00000361665.7_2	ENSG00000082641.16_7	NFE2L1	Isoform	Heart failure (pre-LVAD)	iPSC-CVPC	20.9898899418511	3.31028442536782	2.28557874176415e-10	6.65331971727544e-06
ENST00000361875.7_2	ENSG00000196428.12_6	TSC22D2	Isoform	Heart failure (pre-LVAD)	iPSC-CVPC	-37.9238267425819	5.41752267280111	2.5556891163576e-12	7.43961101771697e-08
ENST00000361910.9_3	ENSG00000198960.11_6	ARMCX6	Isoform	Heart failure (pre-LVAD)	iPSC-CVPC	-37.0312055094006	7.5557145863425	9.5308414516723e-07	0.0277442794658181
ENST00000361961.7_3	ENSG00000139116.18_6	KIF21A	Isoform	Heart failure (pre-LVAD)	iPSC-CVPC	-30.4694793256262	6.35112244069414	1.60662070623062e-06	0.0467687287583734
ENST00000362042.8_3	ENSG00000082641.16_7	NFE2L1	Isoform	Heart failure (pre-LVAD)	iPSC-CVPC	-19.2544016244812	4.00396995116849	1.5181798766461e-06	0.044194216209168
ENST00000367649.7_2	ENSG00000075391.16_7	RASAL2	Isoform	Heart failure (pre-LVAD)	iPSC-CVPC	-41.1707970948274	6.31355173867404	6.98308766041912e-11	2.03277681794801e-06
ENST00000367651.4_4	ENSG00000164442.10_6	CITED2	Isoform	Heart failure (pre-LVAD)	iPSC-CVPC	-120.609720254279	13.2169244749955	7.14719483430232e-20	2.08054841626541e-15
ENST00000368530.7_5	ENSG00000143549.21_8	TPM3	Isoform	Heart failure (pre-LVAD)	iPSC-CVPC	16.9006523137256	2.67740950995629	2.74891910139916e-10	8.00210350417295e-06
ENST00000368590.9_5	ENSG00000111832.13_8	RWDD1	Isoform	Heart failure (pre-LVAD)	iPSC-CVPC	-38.2669229625548	6.14637956445113	4.78710740533026e-10	1.39352696569164e-05
ENST00000369026.3_4	ENSG00000143384.13_6	MCL1	Isoform	Heart failure (pre-LVAD)	iPSC-CVPC	-92.4244217107878	11.6250676263965	1.85847777579655e-15	5.41002880534376e-11
ENST00000369516.7_3	ENSG00000134198.10_6	TSPAN2	Isoform	Heart failure (pre-LVAD)	iPSC-CVPC	-99.9631916738903	18.63874699202	8.17637004899999e-08	0.0023801413212639
ENST00000369878.9_2	ENSG00000148842.18_4	CNNM2	Isoform	Heart failure (pre-LVAD)	iPSC-CVPC	64.4390036460736	6.15202227923463	1.13202622765102e-25	3.29532834869212e-21
ENST00000370021.1_2	ENSG00000134186.12_4	PRPF38B	Isoform	Heart failure (pre-LVAD)	iPSC-CVPC	56.7837048127302	10.9457165857703	2.12843440567144e-07	0.00619587255490956
ENST00000370025.9_2	ENSG00000134186.12_4	PRPF38B	Isoform	Heart failure (pre-LVAD)	iPSC-CVPC	-58.8092492300308	11.9653439495867	8.87982271261913e-07	0.0258491639164343
ENST00000370986.9_2	ENSG00000116717.13_5	GADD45A	Isoform	Heart failure (pre-LVAD)	iPSC-CVPC	-97.3843095698408	14.609689030436	2.63344787410345e-11	7.66596676151514e-07
ENST00000371319.7_3	ENSG00000157216.15_7	SSBP3	Isoform	Heart failure (pre-LVAD)	iPSC-CVPC	-66.3751414092732	10.0544833331655	4.06890009237291e-11	1.18445681688975e-06
ENST00000371421.9_2	ENSG00000197070.14_5	ARRDC1	Isoform	Heart failure (pre-LVAD)	iPSC-CVPC	-57.4040098043796	11.5969598655486	7.42444463091163e-07	0.0216125583205838
ENST00000371681.8_1	ENSG00000165338.16_5	HECTD2	Isoform	Heart failure (pre-LVAD)	iPSC-CVPC	25.6612972795194	4.99749728277018	2.8239968020686e-07	0.0082206546908217
ENST00000371733.8_3	ENSG00000085832.17_8	EPS15	Isoform	Heart failure (pre-LVAD)	iPSC-CVPC	36.6755496676034	7.01273341979618	1.6964687434733e-07	0.00493842051225078
ENST00000372066.7_1	ENSG00000122367.19_5	LDB3	Isoform	Heart failure (pre-LVAD)	iPSC-CVPC	14.4494319544192	2.34756923198989	7.50485774266126e-10	2.18466408888869e-05
ENST00000372164.7_1	ENSG00000108219.15_4	TSPAN14	Isoform	Heart failure (pre-LVAD)	iPSC-CVPC	44.1756671052129	6.98660222520428	2.56680431898878e-10	7.47196737257634e-06
ENST00000372841.8_3	ENSG00000196968.11_5	FUT11	Isoform	Heart failure (pre-LVAD)	iPSC-CVPC	-43.5435800676105	7.52517329125175	7.19155631770425e-09	0.000209346204408371
ENST00000372868.6_1	ENSG00000064205.10_4	CCN5	Isoform	Heart failure (pre-LVAD)	iPSC-CVPC	56.9751214067552	6.84041147206752	8.13938667499116e-17	2.36937546108993e-12
ENST00000372874.9_3	ENSG00000196839.13_5	ADA	Isoform	Heart failure (pre-LVAD)	iPSC-CVPC	-69.0233472829061	11.6413546764482	3.04505360649903e-09	8.86415104851868e-05
ENST00000372886.6_2	ENSG00000168734.14_4	PKIG	Isoform	Heart failure (pre-LVAD)	iPSC-CVPC	83.1903847126417	17.1829812663157	1.28901149017584e-06	0.0375231244790187
ENST00000372894.7_1	ENSG00000168734.14_4	PKIG	Isoform	Heart failure (pre-LVAD)	iPSC-CVPC	-82.9600003844953	16.606369219247	5.86307523075019e-07	0.0170674119967138
ENST00000373033.6_3	ENSG00000112561.18_6	TFEB	Isoform	Heart failure (pre-LVAD)	iPSC-CVPC	-78.6812753028329	15.1610303096834	2.10627465744913e-07	0.00613136552783442
ENST00000373192.4_2	ENSG00000107731.12_4	UNC5B	Isoform	Heart failure (pre-LVAD)	iPSC-CVPC	61.3920017231475	11.3356149052214	6.09978705710124e-08	0.00177564801232217
ENST00000373586.1_1	ENSG00000084623.11_3	EIF3I	Isoform	Heart failure (pre-LVAD)	iPSC-CVPC	32.0397209797899	4.71444085008927	1.07503494804161e-11	3.12942673374913e-07
ENST00000373758.5_2	ENSG00000165476.14_4	REEP3	Isoform	Heart failure (pre-LVAD)	iPSC-CVPC	-69.5677623250279	13.0896410516169	1.06822115569914e-07	0.0031095917842402
ENST00000374151.7_3	ENSG00000204161.14_8	TMEM273	Isoform	Heart failure (pre-LVAD)	iPSC-CVPC	17.0477261061914	3.46757045530611	8.81809959875582e-07	0.0256694879319782
ENST00000374291.5_2	ENSG00000117632.23_6	STMN1	Isoform	Heart failure (pre-LVAD)	iPSC-CVPC	70.9427090164843	8.16896700927463	3.80692655530252e-18	1.10819632024856e-13
ENST00000374561.6_3	ENSG00000117318.9_5	ID3	Isoform	Heart failure (pre-LVAD)	iPSC-CVPC	-22.0802396207192	4.54710451208619	1.19847182889459e-06	0.0348875149391215
ENST00000374606.9_1	ENSG00000204220.11_4	PFDN6	Isoform	Heart failure (pre-LVAD)	iPSC-CVPC	-53.0096408706958	9.69523465921177	4.5617627139131e-08	0.0013279291260201
ENST00000374656.5_2	ENSG00000204227.5_4	RING1	Isoform	Heart failure (pre-LVAD)	iPSC-CVPC	-27.2647676681273	5.50457128341889	7.30352541622707e-07	0.021260562486637
ENST00000374866.9_4	ENSG00000204262.14_7	COL5A2	Isoform	Heart failure (pre-LVAD)	iPSC-CVPC	-39.5992666614708	7.79458953270582	3.76734072827761e-07	0.0109667288600161
ENST00000374902.9_3	ENSG00000136891.14_6	TEX10	Isoform	Heart failure (pre-LVAD)	iPSC-CVPC	-39.0841028998306	4.90101455851263	1.5275591700426e-15	4.44672474399401e-11
ENST00000375173.1_1	ENSG00000136925.15_5	TSTD2	Isoform	Heart failure (pre-LVAD)	iPSC-CVPC	44.160106928856	7.72399801285205	1.08255244815975e-08	0.000315131017659303
ENST00000375772.7_2	ENSG00000179222.18_5	MAGED1	Isoform	Heart failure (pre-LVAD)	iPSC-CVPC	35.9593974546197	7.36413850222056	1.04461620071225e-06	0.0304087776027336
ENST00000375799.8_2	ENSG00000116786.13_6	PLEKHM2	Isoform	Heart failure (pre-LVAD)	iPSC-CVPC	38.532202072193	7.78890387347479	7.53414036570461e-07	0.0219318826045661
ENST00000377351.8_1	ENSG00000130985.17_8	UBA1	Isoform	Heart failure (pre-LVAD)	iPSC-CVPC	50.3479785867252	8.77603394372129	9.63765625576453e-09	0.000280552173605305
ENST00000377390.7_2	ENSG00000168066.20_6	SF1	Isoform	Heart failure (pre-LVAD)	iPSC-CVPC	-31.3614673919703	6.06123308171459	2.29003796750747e-07	0.00666630052341425
ENST00000377627.7_1	ENSG00000041988.15_6	THAP3	Isoform	Heart failure (pre-LVAD)	iPSC-CVPC	58.1627625244369	2.89044835716063	4.69762227039365e-90	1.36747784291159e-85
ENST00000378088.1_2	ENSG00000070610.14_5	GBA2	Isoform	Heart failure (pre-LVAD)	iPSC-CVPC	18.9946797789668	3.76858596043456	4.64882595526292e-07	0.0135327323557704
ENST00000378102.3_2	ENSG00000112308.13_5	C6orf62	Isoform	Heart failure (pre-LVAD)	iPSC-CVPC	81.4575301579644	14.2262162229446	1.02902211517304e-08	0.000299548337726872
ENST00000378103.7_5	ENSG00000070610.14_5	GBA2	Isoform	Heart failure (pre-LVAD)	iPSC-CVPC	-60.6255440943514	11.1094592114087	4.83945801896179e-08	0.00140876622931978
ENST00000378119.9_3	ENSG00000112308.13_5	C6orf62	Isoform	Heart failure (pre-LVAD)	iPSC-CVPC	-81.4575301579644	14.3536712364153	1.38663490227691e-08	0.000403649420052809
ENST00000378330.7_3	ENSG00000167522.16_9	ANKRD11	Isoform	Heart failure (pre-LVAD)	iPSC-CVPC	-34.4310212263275	6.64234614663934	2.17686384950764e-07	0.00633685066591674
ENST00000378895.9_3	ENSG00000167536.14_5	DHRS13	Isoform	Heart failure (pre-LVAD)	iPSC-CVPC	-109.169149970585	22.6231313800664	1.39614385871551e-06	0.0406417477272085
ENST00000378904.4_1	ENSG00000183060.15_6	LYSMD4	Isoform	Heart failure (pre-LVAD)	iPSC-CVPC	50.2998245798522	6.59748232456765	2.45754483927118e-14	7.15391302711841e-10
ENST00000379050.3_2	ENSG00000170919.16_6	TPT1-AS1	Isoform	Heart failure (pre-LVAD)	iPSC-CVPC	26.3645522614874	3.7765139655667	2.92695265674036e-12	8.52035918377119e-08
ENST00000379052.10_2	ENSG00000112183.15_4	RBM24	Isoform	Heart failure (pre-LVAD)	iPSC-CVPC	-88.1194725874587	13.4827195759227	6.32982090243595e-11	1.84261086469911e-06
ENST00000379789.8_1	ENSG00000170525.21_7	PFKFB3	Isoform	Heart failure (pre-LVAD)	iPSC-CVPC	76.9927613865302	15.4234190533618	5.97762500691953e-07	0.0174008663951428
ENST00000379845.3_2	ENSG00000104332.12_6	SFRP1	Isoform	Heart failure (pre-LVAD)	iPSC-CVPC	77.732263770263	12.9053135789921	1.70921752395857e-09	4.9755322122434e-05
ENST00000379888.9_2	ENSG00000134453.16_5	RBM17	Isoform	Heart failure (pre-LVAD)	iPSC-CVPC	-52.7110570858269	8.83737627192428	2.45294792005603e-09	7.1405313952831e-05
ENST00000380006.2_1	ENSG00000196470.12_6	SIAH1	Isoform	Heart failure (pre-LVAD)	iPSC-CVPC	13.6618036761761	1.8398530764203	1.12366362174658e-13	3.27098480290429e-09
ENST00000380276.6_2	ENSG00000160201.11_5	U2AF1	Isoform	Heart failure (pre-LVAD)	iPSC-CVPC	-129.518724874092	23.7742168261441	5.09780127047295e-08	0.00148396994983468
ENST00000389204.8_4	ENSG00000198363.18_6	ASPH	Isoform	Heart failure (pre-LVAD)	iPSC-CVPC	13.5596973305842	1.79846795965811	4.7147890585271e-14	1.37247509493724e-09
ENST00000389266.8_2	ENSG00000106105.14_5	GARS1	Isoform	Heart failure (pre-LVAD)	iPSC-CVPC	64.2249018621159	9.78580730905456	5.27124065040889e-11	1.53445815333403e-06
ENST00000389561.7_2	ENSG00000183495.14_4	EP400	Isoform	Heart failure (pre-LVAD)	iPSC-CVPC	-40.1650241520744	6.75876090292684	2.80432167421838e-09	8.16338039364971e-05
ENST00000389798.7_1	ENSG00000136141.15_5	LRCH1	Isoform	Heart failure (pre-LVAD)	iPSC-CVPC	-47.7634744968799	8.60607848309191	2.85719174183522e-08	0.000831728516048233
ENST00000391770.9_2	ENSG00000179820.16_5	MYADM	Isoform	Heart failure (pre-LVAD)	iPSC-CVPC	38.591284373386	6.38133975038708	1.47091753613089e-09	4.28184094767702e-05
ENST00000391916.7_4	ENSG00000197380.11_5	DACT3	Isoform	Heart failure (pre-LVAD)	iPSC-CVPC	-136.146443972275	18.1134597198407	5.63423064484571e-14	1.64012454071459e-09
ENST00000391975.5_2	ENSG00000115677.17_8	HDLBP	Isoform	Heart failure (pre-LVAD)	iPSC-CVPC	-18.8984458934335	3.06608035736278	7.10577272948792e-10	2.06849044155393e-05
ENST00000392334.6_2	ENSG00000141551.14_7	CSNK1D	Isoform	Heart failure (pre-LVAD)	iPSC-CVPC	-42.3820057267454	6.45778938812857	5.27613860232178e-11	1.53588394713587e-06
ENST00000392524.6_2	ENSG00000170144.20_6	HNRNPA3	Isoform	Heart failure (pre-LVAD)	iPSC-CVPC	-42.4150821095678	8.41145605318537	4.59398821741803e-07	0.0133730997009039
ENST00000393006.5_2	ENSG00000136709.12_7	WDR33	Isoform	Heart failure (pre-LVAD)	iPSC-CVPC	14.7541439658654	2.73715838813755	7.03345674152062e-08	0.00204743925745665
ENST00000393623.6_3	ENSG00000079999.14_6	KEAP1	Isoform	Heart failure (pre-LVAD)	iPSC-CVPC	-78.1829656946669	13.4715210234643	6.49161823681959e-09	0.000188971006873818
ENST00000393950.7_3	ENSG00000106330.12_4	MOSPD3	Isoform	Heart failure (pre-LVAD)	iPSC-CVPC	-76.4478777181766	14.4924695804595	1.32751058642043e-07	0.00386438331706987
ENST00000393979.3_1	ENSG00000239306.5_4	RBM14	Isoform	Heart failure (pre-LVAD)	iPSC-CVPC	84.1694474539405	15.1971749066175	3.05085368604484e-08	0.000888103508007653
ENST00000394202.8_2	ENSG00000117519.16_5	CNN3	Isoform	Heart failure (pre-LVAD)	iPSC-CVPC	-21.3436804846196	3.77202785346854	1.52781714290636e-08	0.000444747570300041
ENST00000394225.6_2	ENSG00000109390.12_6	NDUFC1	Isoform	Heart failure (pre-LVAD)	iPSC-CVPC	-49.0404059041759	10.1762645553789	1.44209438384567e-06	0.0419793675137475
ENST00000394332.5_2	ENSG00000125691.14_8	RPL23	Isoform	Heart failure (pre-LVAD)	iPSC-CVPC	-29.8446699071729	2.8804250001411	3.72247989064426e-25	1.08361389616654e-20
ENST00000394522.7_5	ENSG00000145349.17_8	CAMK2D	Isoform	Heart failure (pre-LVAD)	iPSC-CVPC	-18.7927804026295	3.91983697344025	1.63263357401028e-06	0.0475259633394393
ENST00000394945.6_3	ENSG00000152377.14_5	SPOCK1	Isoform	Heart failure (pre-LVAD)	iPSC-CVPC	-102.165670667023	21.1510162622584	1.36330182548784e-06	0.039685716139951
ENST00000395003.5_3	ENSG00000043143.20_4	JADE2	Isoform	Heart failure (pre-LVAD)	iPSC-CVPC	62.6507597087897	12.48035333233	5.16847153722967e-07	0.0150454206448756
ENST00000395139.7_2	ENSG00000068001.14_8	HYAL2	Isoform	Heart failure (pre-LVAD)	iPSC-CVPC	-96.019656868103	15.4912558975463	5.70714645135355e-10	1.66135033198902e-05
ENST00000395270.5_1	ENSG00000196313.11_3	POM121	Isoform	Heart failure (pre-LVAD)	iPSC-CVPC	24.9882827892566	2.25823859324012	1.84665101828639e-28	5.37560111423168e-24
ENST00000395706.2_2	ENSG00000177427.13_6	MIEF2	Isoform	Heart failure (pre-LVAD)	iPSC-CVPC	-64.5306163368117	13.3873593135318	1.43367822326089e-06	0.0417343730791245
ENST00000396319.6_2	ENSG00000106052.13_5	TAX1BP1	Isoform	Heart failure (pre-LVAD)	iPSC-CVPC	28.9028872982327	5.98127614377579	1.35013817155563e-06	0.0393025221739844
ENST00000396504.6_2	ENSG00000100413.17_5	POLR3H	Isoform	Heart failure (pre-LVAD)	iPSC-CVPC	87.5341611492199	12.7663559045998	7.0504607921604e-12	2.05238913659789e-07
ENST00000396723.9_1	ENSG00000170791.18_6	CHCHD7	Isoform	Heart failure (pre-LVAD)	iPSC-CVPC	53.0069579462382	10.7578372295899	8.33789840024205e-07	0.0242716222431046
ENST00000397166.7_3	ENSG00000085788.14_9	DDHD2	Isoform	Heart failure (pre-LVAD)	iPSC-CVPC	-69.3963637740849	14.1829091440203	9.93321438167099e-07	0.0289155870650443
ENST00000397261.7_1	ENSG00000241553.12_4	ARPC4	Isoform	Heart failure (pre-LVAD)	iPSC-CVPC	-33.2687416560935	5.46202652541972	1.12266848120754e-09	3.26808794879515e-05
ENST00000397890.6_3	ENSG00000072832.15_6	CRMP1	Isoform	Heart failure (pre-LVAD)	iPSC-CVPC	-73.0031450546964	7.60912642531555	8.46067909900851e-22	2.46290368572138e-17
ENST00000398125.5_2	ENSG00000087274.17_7	ADD1	Isoform	Heart failure (pre-LVAD)	iPSC-CVPC	-20.0948803313016	4.11337651804353	1.03296718846969e-06	0.0300696748563527
ENST00000399075.6_3	ENSG00000164096.13_6	C4orf3	Isoform	Heart failure (pre-LVAD)	iPSC-CVPC	-16.3660398663718	3.3346730194795	9.2085176750618e-07	0.0268059949521049
ENST00000399138.5_2	ENSG00000091542.9_4	ALKBH5	Isoform	Heart failure (pre-LVAD)	iPSC-CVPC	-53.7569368392528	10.3377490309088	1.99221962950567e-07	0.00579935134149101
ENST00000399799.3_3	ENSG00000067900.8_6	ROCK1	Isoform	Heart failure (pre-LVAD)	iPSC-CVPC	-43.7678622935012	6.7636775954001	9.73464722275203e-11	2.83375580654312e-06
ENST00000399982.6_2	ENSG00000100888.14_8	CHD8	Isoform	Heart failure (pre-LVAD)	iPSC-CVPC	-45.2827367521713	8.14541081635657	2.7086746539489e-08	0.000788495191764525
ENST00000401672.7_5	ENSG00000100239.16_7	PPP6R2	Isoform	Heart failure (pre-LVAD)	iPSC-CVPC	-58.8469229366083	8.20278026705607	7.28261049094297e-13	2.1199679139135e-08
ENST00000402285.7_1	ENSG00000143947.13_3	RPS27A	Isoform	Heart failure (pre-LVAD)	iPSC-CVPC	34.1376232836167	4.34366180165097	3.86653906857083e-15	1.12554952286097e-10
ENST00000402522.1_1	ENSG00000065882.16_5	TBC1D1	Isoform	Heart failure (pre-LVAD)	iPSC-CVPC	8.93931327884229	0.824876385620705	2.29497131579079e-27	6.68066150026699e-23
ENST00000403092.5_3	ENSG00000183023.18_6	SLC8A1	Isoform	Heart failure (pre-LVAD)	iPSC-CVPC	-60.7491501081975	12.1932967393053	6.28732155453301e-07	0.0183023930452456
ENST00000403372.6_4	ENSG00000127863.15_5	TNFRSF19	Isoform	Heart failure (pre-LVAD)	iPSC-CVPC	61.3309638534999	10.0981219817583	1.25150455348262e-09	3.64312975518791e-05
ENST00000404121.6_2	ENSG00000196498.13_9	NCOR2	Isoform	Heart failure (pre-LVAD)	iPSC-CVPC	-28.9690911277757	4.71978083810288	8.36698438037783e-10	2.43562915312799e-05
ENST00000405308.6_3	ENSG00000110492.15_6	MDK	Isoform	Heart failure (pre-LVAD)	iPSC-CVPC	18.9558491430042	3.91772052133376	1.30829684135318e-06	0.0380845210517911
ENST00000405957.6_1	ENSG00000130592.16_3	LSP1	Isoform	Heart failure (pre-LVAD)	iPSC-CVPC	40.7733704851901	5.715417160367	9.75448689904659e-13	2.83953113631246e-08
ENST00000409031.5_4	ENSG00000136699.19_7	SMPD4	Isoform	Heart failure (pre-LVAD)	iPSC-CVPC	20.930117421406	2.88917092441133	4.34571226373428e-13	1.26503683997305e-08
ENST00000409174.1_1	ENSG00000159399.10_5	HK2	Isoform	Heart failure (pre-LVAD)	iPSC-CVPC	93.309995032365	17.3351977099893	7.33808613919357e-08	0.00213611687511925
ENST00000409307.5_1	ENSG00000144535.19_8	DIS3L2	Isoform	Heart failure (pre-LVAD)	iPSC-CVPC	56.5920773490446	11.275550438068	5.19389992206105e-07	0.0151194426731197
ENST00000409733.5_2	ENSG00000071082.11_5	RPL31	Isoform	Heart failure (pre-LVAD)	iPSC-CVPC	7.35126596875244	1.28822017849834	1.15303184371058e-08	0.00033564756970415
ENST00000409887.3_2	ENSG00000181350.12_6	LRRC75A	Isoform	Heart failure (pre-LVAD)	iPSC-CVPC	100.084372085143	18.4555833423317	5.86115492263706e-08	0.00170618219797965
ENST00000412236.1_5	ENSG00000116688.17_8	MFN2	Isoform	Heart failure (pre-LVAD)	iPSC-CVPC	23.1126536233018	3.85934075575432	2.11450924304967e-09	6.15533640651759e-05
ENST00000412806.1_2	ENSG00000131370.16_7	SH3BP5	Isoform	Heart failure (pre-LVAD)	iPSC-CVPC	62.0074525990132	11.6160829774963	9.3941703265995e-08	0.00273464298207312
ENST00000413266.6_3	ENSG00000022840.16_7	RNF10	Isoform	Heart failure (pre-LVAD)	iPSC-CVPC	47.4116044485038	8.2385877406436	8.67332300244471e-09	0.000252480432601166
ENST00000414282.5_2	ENSG00000233016.7_7	SNHG7	Isoform	Heart failure (pre-LVAD)	iPSC-CVPC	8.70851076024825	1.46273017834477	2.62307048043082e-09	7.63575816853412e-05
ENST00000414393.5_1	ENSG00000213742.7_7	ZNF337-AS1	Isoform	Heart failure (pre-LVAD)	iPSC-CVPC	53.1732699587506	8.45241398611933	3.15635719290813e-10	9.18815578855557e-06
ENST00000414441.5_1	ENSG00000146834.14_4	MEPCE	Isoform	Heart failure (pre-LVAD)	iPSC-CVPC	66.3238394969049	13.8091154398036	1.56381793346612e-06	0.0455227400431988
ENST00000415751.1_3	ENSG00000189320.9_7	FAM180A	Isoform	Heart failure (pre-LVAD)	iPSC-CVPC	49.2975316758046	6.41544038444983	1.53955116221433e-14	4.48163343320591e-10
ENST00000416202.5_1	ENSG00000241990.5_8	PRR34-AS1	Isoform	Heart failure (pre-LVAD)	iPSC-CVPC	86.1961538080086	12.6454900965753	9.33791692066442e-12	2.71826761560541e-07
ENST00000418939.1_3	ENSG00000184203.8_6	PPP1R2	Isoform	Heart failure (pre-LVAD)	iPSC-CVPC	65.5791885591423	11.9858341428751	4.46516201334144e-08	0.00129980866208369
ENST00000419070.6_2	ENSG00000132305.20_4	IMMT	Isoform	Heart failure (pre-LVAD)	iPSC-CVPC	58.9467942075611	9.70158004909463	1.23217897375559e-09	3.58687299260252e-05
ENST00000419617.7_3	ENSG00000104375.17_8	STK3	Isoform	Heart failure (pre-LVAD)	iPSC-CVPC	-65.6495294019567	11.7441176365928	2.27079431955113e-08	0.000661028226421334
ENST00000420189.1_5	ENSG00000144567.11_8	RETREG2	Isoform	Heart failure (pre-LVAD)	iPSC-CVPC	46.7943025706548	6.64411569877469	1.8818576924794e-12	5.47808774280753e-08
ENST00000420892.1_1	ENSG00000166033.13_5	HTRA1	Isoform	Heart failure (pre-LVAD)	iPSC-CVPC	48.2240301665182	6.95829624937864	4.19544117837144e-12	1.22129292702393e-07
ENST00000421756.5_3	ENSG00000126217.21_6	MCF2L	Isoform	Heart failure (pre-LVAD)	iPSC-CVPC	22.7094765271095	2.62650517488248	5.32094851721555e-18	1.54892811336145e-13
ENST00000422234.2_3	ENSG00000127603.29_10	MACF1	Isoform	Heart failure (pre-LVAD)	iPSC-CVPC	13.0853244455753	2.36159051155673	3.00930070168729e-08	0.00087600743426117
ENST00000422689.3_2	ENSG00000221923.9_4	ZNF880	Isoform	Heart failure (pre-LVAD)	iPSC-CVPC	119.467078572216	24.8048557980284	1.46260798761359e-06	0.0425765185194316
ENST00000422840.7_3	ENSG00000090863.12_5	GLG1	Isoform	Heart failure (pre-LVAD)	iPSC-CVPC	-34.2530652153646	5.96809273241698	9.50319518602751e-09	0.000276638011865261
ENST00000422989.5_2	ENSG00000167378.8_5	IRGQ	Isoform	Heart failure (pre-LVAD)	iPSC-CVPC	-54.5715541051016	10.1553603902107	7.71500559544545e-08	0.00224583812883417
ENST00000423181.1_2	ENSG00000168887.11_7	C2orf68	Isoform	Heart failure (pre-LVAD)	iPSC-CVPC	-38.9865128509092	6.82878033156829	1.13543586443148e-08	0.000330525380136004
ENST00000426464.2_2	ENSG00000167536.14_5	DHRS13	Isoform	Heart failure (pre-LVAD)	iPSC-CVPC	126.682735051163	24.1646479054399	1.58430731857618e-07	0.00461191860437526
ENST00000426837.6_2	ENSG00000047849.21_9	MAP4	Isoform	Heart failure (pre-LVAD)	iPSC-CVPC	21.7414170844059	2.65592107120111	2.70011882167977e-16	7.86004588990981e-12
ENST00000427177.6_3	ENSG00000184640.18_7	SEPTIN9	Isoform	Heart failure (pre-LVAD)	iPSC-CVPC	-43.5062199386147	9.03562458229788	1.47225380388578e-06	0.0428573082311151
ENST00000427718.6_2	ENSG00000135108.14_5	FBXO21	Isoform	Heart failure (pre-LVAD)	iPSC-CVPC	57.7627444515876	10.5180710966648	3.97943149864426e-08	0.00115841250925534
ENST00000427895.5_1	ENSG00000172354.10_7	GNB2	Isoform	Heart failure (pre-LVAD)	iPSC-CVPC	-55.5522071436096	8.49777378605656	6.26535856035845e-11	1.82384587692034e-06
ENST00000427908.6_2	ENSG00000213347.10_5	MXD3	Isoform	Heart failure (pre-LVAD)	iPSC-CVPC	46.9004852616919	5.62475561639207	7.54131404257681e-17	2.19527651779411e-12
ENST00000428708.6_2	ENSG00000175866.15_7	BAIAP2	Isoform	Heart failure (pre-LVAD)	iPSC-CVPC	-94.016986722959	17.2376001842736	4.91991446903053e-08	0.00143218710193479
ENST00000429178.5_1	ENSG00000164828.18_8	SUN1	Isoform	Heart failure (pre-LVAD)	iPSC-CVPC	28.7590861251104	5.02130806739296	1.01975974053741e-08	0.00029685206047044
ENST00000429436.7_2	ENSG00000075413.18_7	MARK3	Isoform	Heart failure (pre-LVAD)	iPSC-CVPC	-59.6178230384533	8.98001992638704	3.15944684442058e-11	9.19714976410831e-07
ENST00000429789.6_2	ENSG00000177830.18_8	CHID1	Isoform	Heart failure (pre-LVAD)	iPSC-CVPC	41.5385782325758	6.5368557824108	2.09078980084671e-10	6.08628911026477e-06
ENST00000430077.6_1	ENSG00000130821.16_8	SLC6A8	Isoform	Heart failure (pre-LVAD)	iPSC-CVPC	-60.6747082618881	9.4298238097016	1.24009628246797e-10	3.60992027826426e-06
ENST00000430157.6_1	ENSG00000221983.8_6	UBA52	Isoform	Heart failure (pre-LVAD)	iPSC-CVPC	-44.2263867368827	6.67894606549641	3.54943846046443e-11	1.0332415358412e-06
ENST00000430960.5_3	ENSG00000198157.11_8	HMGN5	Isoform	Heart failure (pre-LVAD)	iPSC-CVPC	-118.619909099078	19.6563856555827	1.592824300347e-09	4.63671153831012e-05
ENST00000431508.5_3	ENSG00000131503.21_5	ANKHD1	Isoform	Heart failure (pre-LVAD)	iPSC-CVPC	34.5682375416654	6.47111794512834	9.19638581420891e-08	0.00267706791051621
ENST00000432336.1_4	ENSG00000136213.10_7	CHST12	Isoform	Heart failure (pre-LVAD)	iPSC-CVPC	-55.7333797065289	10.7348127504403	2.08231177559759e-07	0.00606160957876459
ENST00000432763.7_3	ENSG00000196235.14_7	SUPT5H	Isoform	Heart failure (pre-LVAD)	iPSC-CVPC	-37.6176189891987	7.80948313512311	1.45794520458724e-06	0.0424407849055346
ENST00000432854.5_3	ENSG00000136279.20_8	DBNL	Isoform	Heart failure (pre-LVAD)	iPSC-CVPC	25.4784914316751	4.31793412739743	3.62136608090383e-09	0.00010541796661511
ENST00000434050.5_1	ENSG00000182979.18_8	MTA1	Isoform	Heart failure (pre-LVAD)	iPSC-CVPC	12.1683075011012	2.25441109690495	6.75552329103357e-08	0.00196653283001987
ENST00000434127.2_2	ENSG00000187678.9_6	SPRY4	Isoform	Heart failure (pre-LVAD)	iPSC-CVPC	-58.2510439671819	9.62209871190816	1.41396771307356e-09	4.11606001275713e-05
ENST00000436108.6_2	ENSG00000177830.18_8	CHID1	Isoform	Heart failure (pre-LVAD)	iPSC-CVPC	-48.05455446703	8.45287008295478	1.30813742282518e-08	0.00038079880378441
ENST00000437131.1_1	ENSG00000144674.16_7	GOLGA4	Isoform	Heart failure (pre-LVAD)	iPSC-CVPC	51.2886331243449	8.31622311028264	6.94663998054178e-10	2.02216689833571e-05
ENST00000437202.1_2	ENSG00000115317.11_3	HTRA2	Isoform	Heart failure (pre-LVAD)	iPSC-CVPC	-37.9191901077396	7.06135659994307	7.87548737435003e-08	0.00229255437467329
ENST00000437629.6_2	ENSG00000122376.11_6	SHLD2	Isoform	Heart failure (pre-LVAD)	iPSC-CVPC	60.6679510621712	2.42119582656765	1.46389061112523e-138	4.26138556898554e-134
ENST00000440191.6_1	ENSG00000156976.17_7	EIF4A2	Isoform	Heart failure (pre-LVAD)	iPSC-CVPC	-22.9334718955979	4.43304297718887	2.29992326289116e-07	0.00669507661827617
ENST00000441867.5_5	ENSG00000204574.13_6	ABCF1	Isoform	Heart failure (pre-LVAD)	iPSC-CVPC	27.2795521038047	5.63814587777609	1.30894700499749e-06	0.0381034473154769
ENST00000443296.1_3	ENSG00000244274.7_6	DBNDD2	Isoform	Heart failure (pre-LVAD)	iPSC-CVPC	7.88009436427059	1.45682448805005	6.33458909178676e-08	0.00184399888461913
ENST00000444191.5_4	ENSG00000172534.14_7	HCFC1	Isoform	Heart failure (pre-LVAD)	iPSC-CVPC	40.8263966494304	6.48626751348769	3.08826014290743e-10	8.98992527600353e-06
ENST00000444664.5_6	ENSG00000160691.19_8	SHC1	Isoform	Heart failure (pre-LVAD)	iPSC-CVPC	7.2869354723442	1.42750654784546	3.31389913795959e-07	0.00964676039060037
ENST00000444878.5_2	ENSG00000131051.24_10	RBM39	Isoform	Heart failure (pre-LVAD)	iPSC-CVPC	38.8197102828765	6.87495998734209	1.63712728365146e-08	0.00047656775227094
ENST00000444883.1	ENSG00000236943.2	RP11-640M9.1	Isoform	Heart failure (pre-LVAD)	iPSC-CVPC	69.370106052057	12.1890091089096	1.26148585662383e-08	0.000367218532863197
ENST00000445517.1_2	ENSG00000106588.11_6	PSMA2	Isoform	Heart failure (pre-LVAD)	iPSC-CVPC	71.2827686721005	13.2563177856859	7.56247151885745e-08	0.0022014354591394
ENST00000446526.8_3	ENSG00000161542.17_6	PRPSAP1	Isoform	Heart failure (pre-LVAD)	iPSC-CVPC	-26.9603679595361	4.26250973986088	2.53234947050579e-10	7.37166930864235e-06
ENST00000447123.5_1	ENSG00000106636.8_5	YKT6	Isoform	Heart failure (pre-LVAD)	iPSC-CVPC	25.6775221596852	5.15378946136256	6.28457194234199e-07	0.0182943889241575
ENST00000448521.5_2	ENSG00000136279.20_8	DBNL	Isoform	Heart failure (pre-LVAD)	iPSC-CVPC	-44.9817657077706	7.76485719599106	6.91428670718512e-09	0.000201274886046159
ENST00000448903.7_4	ENSG00000183020.14_8	AP2A2	Isoform	Heart failure (pre-LVAD)	iPSC-CVPC	-61.2901778880931	8.95914015893395	7.85993663742016e-12	2.28802755515301e-07
ENST00000449025.5_2	ENSG00000204256.13_8	BRD2	Isoform	Heart failure (pre-LVAD)	iPSC-CVPC	13.9652673872478	2.6475486319392	1.32907004490322e-07	0.00386892290071327
ENST00000449085.3_1	ENSG00000204256.13_8	BRD2	Isoform	Heart failure (pre-LVAD)	iPSC-CVPC	13.9652673872478	2.7828532401529	5.21234175589978e-07	0.0151731268514243
ENST00000449246.5_1	ENSG00000182606.16_8	TRAK1	Isoform	Heart failure (pre-LVAD)	iPSC-CVPC	23.1853003654745	4.64665251507963	6.04799858437047e-07	0.0176057238791024
ENST00000450548.5_1	ENSG00000143164.15_4	DCAF6	Isoform	Heart failure (pre-LVAD)	iPSC-CVPC	12.2109314778837	2.09594241173396	5.67763221586483e-09	0.000165275873803825
ENST00000451315.7_2	ENSG00000225921.7_4	NOL7	Isoform	Heart failure (pre-LVAD)	iPSC-CVPC	-60.9755688835954	11.8164309235257	2.46639108392813e-07	0.00717966444531479
ENST00000451855.1_2	ENSG00000130723.20_7	PRRC2B	Isoform	Heart failure (pre-LVAD)	iPSC-CVPC	-13.0188171163649	2.50277040337572	1.97407444207391e-07	0.00574653070087715
ENST00000452360.6_1	ENSG00000127419.17_9	TMEM175	Isoform	Heart failure (pre-LVAD)	iPSC-CVPC	20.1439648447292	3.64891429191387	3.37966015345956e-08	0.000983819070672078
ENST00000452376.5_4	ENSG00000182287.15_8	AP1S2	Isoform	Heart failure (pre-LVAD)	iPSC-CVPC	34.1745197505751	5.6421260852838	1.38658838701045e-09	4.03635879458742e-05
ENST00000452431.5_3	ENSG00000179818.14_6	PCBP1-AS1	Isoform	Heart failure (pre-LVAD)	iPSC-CVPC	49.6630828159499	3.31639422554083	1.06929377171137e-50	3.1127141694518e-46
ENST00000452671.6_3	ENSG00000143390.17_6	RFX5	Isoform	Heart failure (pre-LVAD)	iPSC-CVPC	-36.3495384274449	7.26780251114221	5.69012303644439e-07	0.0165639481590896
ENST00000453744.7_3	ENSG00000109332.20_8	UBE2D3	Isoform	Heart failure (pre-LVAD)	iPSC-CVPC	-18.3770872763158	3.56040543743886	2.44958815469557e-07	0.0071307511183188
ENST00000454244.4_1	ENSG00000071282.12_5	LMCD1	Isoform	Heart failure (pre-LVAD)	iPSC-CVPC	-32.233689292881	6.57560984745891	9.48621767714272e-07	0.0276143796581625
ENST00000454345.5_2	ENSG00000149091.15_7	DGKZ	Isoform	Heart failure (pre-LVAD)	iPSC-CVPC	12.1359473027782	2.21289739115963	4.1537075350779e-08	0.00120914426346118
ENST00000455785.7_3	ENSG00000117632.23_6	STMN1	Isoform	Heart failure (pre-LVAD)	iPSC-CVPC	-79.1210181077947	7.40932648557057	1.28230455912459e-26	3.73278857161168e-22
ENST00000456170.6_3	ENSG00000117419.16_7	ERI3	Isoform	Heart failure (pre-LVAD)	iPSC-CVPC	55.8294767078136	10.5367658322065	1.1673221703159e-07	0.00339807483778958
ENST00000457607.1_1	ENSG00000132153.15_4	DHX30	Isoform	Heart failure (pre-LVAD)	iPSC-CVPC	-62.8840601248897	9.98231001513077	2.98511178977752e-10	8.68966042004236e-06
ENST00000457889.1_2	ENSG00000163171.8_4	CDC42EP3	Isoform	Heart failure (pre-LVAD)	iPSC-CVPC	-46.9023071569947	7.50670444494196	4.15593601112092e-10	1.2097929728373e-05
ENST00000457986.5_3	ENSG00000133657.15_7	ATP13A3	Isoform	Heart failure (pre-LVAD)	iPSC-CVPC	-38.358611100287	7.07352883059349	5.86596800326266e-08	0.00170758328574976
ENST00000458073.5_1	ENSG00000100226.16_6	GTPBP1	Isoform	Heart failure (pre-LVAD)	iPSC-CVPC	21.4559183246793	2.14845288142409	1.74317035106792e-23	5.07436889195872e-19
ENST00000459895.1_1	ENSG00000182871.16_6	COL18A1	Isoform	Heart failure (pre-LVAD)	iPSC-CVPC	-39.179998687865	8.12798673744461	1.43283790053525e-06	0.0417099112845811
ENST00000460219.2_3	ENSG00000137409.19_8	MTCH1	Isoform	Heart failure (pre-LVAD)	iPSC-CVPC	10.5970161170094	2.07307909305816	3.19225506302503e-07	0.00929265448846586
ENST00000460483.5_2	ENSG00000119953.13_5	SMNDC1	Isoform	Heart failure (pre-LVAD)	iPSC-CVPC	51.0355407892116	9.98808735240966	3.22771508547757e-07	0.00939587861382521
ENST00000460839.5_2	ENSG00000127241.17_7	MASP1	Isoform	Heart failure (pre-LVAD)	iPSC-CVPC	-45.1364447577747	9.22773701742682	1.00127217738242e-06	0.0291470330836022
ENST00000461306.1_2	ENSG00000082781.12_6	ITGB5	Isoform	Heart failure (pre-LVAD)	iPSC-CVPC	-53.3639031735767	9.87641001728609	6.54740607030884e-08	0.0019059499070669
ENST00000461367.1_1	ENSG00000077522.13_4	ACTN2	Isoform	Heart failure (pre-LVAD)	iPSC-CVPC	-31.4982342270672	6.35468060332776	7.17012017109948e-07	0.0208722198180706
ENST00000461757.1_2	ENSG00000138074.15_10	SLC5A6	Isoform	Heart failure (pre-LVAD)	iPSC-CVPC	19.3694460507537	3.97371455755181	1.09143573866235e-06	0.031771694352461
ENST00000462269.1_2	ENSG00000168610.14_6	STAT3	Isoform	Heart failure (pre-LVAD)	iPSC-CVPC	6.23777769221359	1.10734994793587	1.77031487628821e-08	0.000515338660487498
ENST00000462432.5_2	ENSG00000127054.21_5	INTS11	Isoform	Heart failure (pre-LVAD)	iPSC-CVPC	7.30681824069001	1.20479997943387	1.3215389668465e-09	3.84699993249016e-05
ENST00000462438.1_1	ENSG00000101146.13_5	RAE1	Isoform	Heart failure (pre-LVAD)	iPSC-CVPC	9.92172540058975	1.49045706986134	2.7978875181164e-11	8.14465056523684e-07
ENST00000463165.1_3	ENSG00000196576.15_6	PLXNB2	Isoform	Heart failure (pre-LVAD)	iPSC-CVPC	26.8176527171547	5.35486249582684	5.49717952219548e-07	0.016002289589111
ENST00000464615.1_1	ENSG00000071462.12_7	BUD23	Isoform	Heart failure (pre-LVAD)	iPSC-CVPC	15.0913956893939	2.073054839874	3.3435002128902e-13	9.73292911972337e-09
ENST00000464662.5_2	ENSG00000171130.18_6	ATP6V0E2	Isoform	Heart failure (pre-LVAD)	iPSC-CVPC	-37.8248855386378	7.70655647180371	9.19425437303846e-07	0.026764474479915
ENST00000464916.1_1	ENSG00000164692.18_4	COL1A2	Isoform	Heart failure (pre-LVAD)	iPSC-CVPC	61.2699141561147	9.64705985477276	2.13712635807955e-10	6.22117482836957e-06
ENST00000464939.1_2	ENSG00000204934.10_8	ATP6V0E2-AS1	Isoform	Heart failure (pre-LVAD)	iPSC-CVPC	67.1060086251138	4.61499970446047	6.67606026063116e-48	1.94340114186973e-43
ENST00000464942.7_5	ENSG00000184047.19_8	DIABLO	Isoform	Heart failure (pre-LVAD)	iPSC-CVPC	-53.1172523429003	10.1477223397649	1.65520371051036e-07	0.00481829800129566
ENST00000465063.5_2	ENSG00000079974.17_5	RABL2B	Isoform	Heart failure (pre-LVAD)	iPSC-CVPC	32.5251847867329	4.60220207564244	1.57966787943408e-12	4.59841319703261e-08
ENST00000465149.1_2	ENSG00000124006.15_6	OBSL1	Isoform	Heart failure (pre-LVAD)	iPSC-CVPC	8.403391223493	1.48244457618438	1.43965691674331e-08	0.000419084128463978
ENST00000465224.5_1	ENSG00000168763.16_4	CNNM3	Isoform	Heart failure (pre-LVAD)	iPSC-CVPC	20.1860113529928	4.05985826100412	6.62323583923478e-07	0.0192802395280124
ENST00000465931.1_1	ENSG00000130723.20_7	PRRC2B	Isoform	Heart failure (pre-LVAD)	iPSC-CVPC	10.455632712268	1.96237784067375	9.92768480749149e-08	0.00288994904746077
ENST00000466092.1_2	ENSG00000148498.16_8	PARD3	Isoform	Heart failure (pre-LVAD)	iPSC-CVPC	44.563891032211	7.07246470807503	2.95652914695379e-10	8.60645634678249e-06
ENST00000466255.1_3	ENSG00000163681.16_6	SLMAP	Isoform	Heart failure (pre-LVAD)	iPSC-CVPC	11.64866304826	2.40701959755926	1.30195660017883e-06	0.0378999566312057
ENST00000466328.2_1	ENSG00000159228.13_4	CBR1	Isoform	Heart failure (pre-LVAD)	iPSC-CVPC	-69.5824901518756	13.0252658976895	9.18674906904901e-08	0.00267426265400017
ENST00000466636.1_1	ENSG00000144867.12_6	SRPRB	Isoform	Heart failure (pre-LVAD)	iPSC-CVPC	31.8323892453659	5.23703933929182	1.21449901674039e-09	3.53540663773128e-05
ENST00000466896.5_2	ENSG00000128609.15_5	NDUFA5	Isoform	Heart failure (pre-LVAD)	iPSC-CVPC	70.8543442198526	11.4777323710171	6.69212199237527e-10	1.94807671198044e-05
ENST00000467457.5_2	ENSG00000178149.17_7	DALRD3	Isoform	Heart failure (pre-LVAD)	iPSC-CVPC	39.0283859726675	4.93408817917011	2.57494311832106e-15	7.49565941743261e-11
ENST00000468508.1_2	ENSG00000173638.19_7	SLC19A1	Isoform	Heart failure (pre-LVAD)	iPSC-CVPC	49.2200529409667	9.65502564678209	3.43498949243446e-07	0.00999925441247671
ENST00000469269.1_2	ENSG00000198959.12_5	TGM2	Isoform	Heart failure (pre-LVAD)	iPSC-CVPC	5.09532730432082	1.01746835786639	5.50418550580995e-07	0.0160226840074128
ENST00000469381.1_1	ENSG00000131149.19_6	GSE1	Isoform	Heart failure (pre-LVAD)	iPSC-CVPC	37.4134693153522	6.71732488628846	2.55181616521434e-08	0.000742833685693894
ENST00000470506.1_2	ENSG00000115392.12_6	FANCL	Isoform	Heart failure (pre-LVAD)	iPSC-CVPC	18.978530626372	3.46618219632732	4.366690902058e-08	0.00127114372158908
ENST00000470827.2_4	ENSG00000125037.12_5	EMC3	Isoform	Heart failure (pre-LVAD)	iPSC-CVPC	-58.9330436680544	7.85262752522016	6.14839184463504e-14	1.78979686597326e-09
ENST00000471204.5_4	ENSG00000116251.11_7	RPL22	Isoform	Heart failure (pre-LVAD)	iPSC-CVPC	38.0270717480705	5.49335986085428	4.44148047241516e-12	1.29291496552005e-07
ENST00000471486.5_1	ENSG00000084623.11_3	EIF3I	Isoform	Heart failure (pre-LVAD)	iPSC-CVPC	-35.0087367542238	4.63471122934911	4.23401777260784e-14	1.23252257360614e-09
ENST00000471534.1_2	ENSG00000169087.11_5	HSPBAP1	Isoform	Heart failure (pre-LVAD)	iPSC-CVPC	58.482766783495	12.0778660931905	1.28445625764153e-06	0.0373905216599449
ENST00000472686.1_2	ENSG00000161542.17_6	PRPSAP1	Isoform	Heart failure (pre-LVAD)	iPSC-CVPC	13.9673657354691	2.79689423451051	5.91769090665446e-07	0.0172263982292711
ENST00000472729.1_1	ENSG00000173163.10_6	COMMD1	Isoform	Heart failure (pre-LVAD)	iPSC-CVPC	44.5813780580482	8.61940854590884	2.31343244183541e-07	0.00673440183818288
ENST00000473946.1_2	ENSG00000128159.12_9	TUBGCP6	Isoform	Heart failure (pre-LVAD)	iPSC-CVPC	20.9264785092612	4.31359248263098	1.22662411601379e-06	0.0357070280171614
ENST00000474026.5_1	ENSG00000162909.18_4	CAPN2	Isoform	Heart failure (pre-LVAD)	iPSC-CVPC	8.6039651197698	1.41678621323827	1.25640506061403e-09	3.65739513144744e-05
ENST00000474161.1_2	ENSG00000138119.17_6	MYOF	Isoform	Heart failure (pre-LVAD)	iPSC-CVPC	22.8724717366109	4.50343431213628	3.79635676163052e-07	0.0110511945331064
ENST00000474485.1_1	ENSG00000225921.7_4	NOL7	Isoform	Heart failure (pre-LVAD)	iPSC-CVPC	58.6220224382311	12.1466988790863	1.39184363789165e-06	0.0405165682990259
ENST00000474602.5_2	ENSG00000081377.17_7	CDC14B	Isoform	Heart failure (pre-LVAD)	iPSC-CVPC	7.90881755650225	1.34450756108613	4.04566407761609e-09	0.000117769281299404
ENST00000475248.5_4	ENSG00000162244.12_9	RPL29	Isoform	Heart failure (pre-LVAD)	iPSC-CVPC	19.0806951328524	3.57843989558701	9.70691376601997e-08	0.00282568259728841
ENST00000475834.2_5	ENSG00000197081.14_8	IGF2R	Isoform	Heart failure (pre-LVAD)	iPSC-CVPC	41.9981875144984	8.48647730370888	7.46584783160112e-07	0.0217330830377909
ENST00000475841.2_2	ENSG00000185684.15_7	EP400P1	Isoform	Heart failure (pre-LVAD)	iPSC-CVPC	40.574790416024	8.1492410195608	6.39250138748119e-07	0.0186085715389577
ENST00000476243.5_2	ENSG00000166582.10_5	CENPV	Isoform	Heart failure (pre-LVAD)	iPSC-CVPC	32.9317875076027	5.7016636256688	7.65788318451615e-09	0.000222920979501265
ENST00000476484.5_2	ENSG00000188938.17_8	FAM120AOS	Isoform	Heart failure (pre-LVAD)	iPSC-CVPC	-40.2657167427284	8.22163670084709	9.70485600215215e-07	0.0282508358222649
ENST00000476623.1_1	ENSG00000156928.5_4	MALSU1	Isoform	Heart failure (pre-LVAD)	iPSC-CVPC	33.6038786816128	6.93828969956541	1.2773175008379e-06	0.0371827124493913
ENST00000476832.2_3	ENSG00000119523.10_5	ALG2	Isoform	Heart failure (pre-LVAD)	iPSC-CVPC	-64.8706455355797	12.4345606678226	1.81880367223538e-07	0.00529453748987719
ENST00000476922.5_1	ENSG00000131069.20_8	ACSS2	Isoform	Heart failure (pre-LVAD)	iPSC-CVPC	21.7199553715045	4.1673481032491	1.86879114638216e-07	0.00544005102711847
ENST00000477180.1_2	ENSG00000163638.13_6	ADAMTS9	Isoform	Heart failure (pre-LVAD)	iPSC-CVPC	35.3851368830392	7.1251321587984	6.82624525916921e-07	0.0198711999494416
ENST00000477648.1_2	ENSG00000136891.14_6	TEX10	Isoform	Heart failure (pre-LVAD)	iPSC-CVPC	21.826013665857	2.47504556175363	1.16076725785379e-18	3.37899348761238e-14
ENST00000477982.2_2	ENSG00000005812.11_8	FBXL3	Isoform	Heart failure (pre-LVAD)	iPSC-CVPC	18.8947885768575	2.51138783539837	5.32701784410105e-14	1.55069489441782e-09
ENST00000478183.5_1	ENSG00000159140.21_8	SON	Isoform	Heart failure (pre-LVAD)	iPSC-CVPC	18.4224147129519	2.62522244346343	2.25924742363826e-12	6.57666925021098e-08
ENST00000478196.6_1	ENSG00000143947.13_3	RPS27A	Isoform	Heart failure (pre-LVAD)	iPSC-CVPC	-26.9965551823234	4.79120602752661	1.75459660693735e-08	0.000510763072279463
ENST00000479034.5_1	ENSG00000133226.17_7	SRRM1	Isoform	Heart failure (pre-LVAD)	iPSC-CVPC	-40.475730879	5.13712837593426	3.2985916064275e-15	9.60220016631045e-11
ENST00000479194.5_1	ENSG00000023902.14_5	PLEKHO1	Isoform	Heart failure (pre-LVAD)	iPSC-CVPC	49.1502830056448	9.42122816850004	1.81871797438601e-07	0.00529428802343768
ENST00000479644.1_1	ENSG00000204344.14_4	STK19	Isoform	Heart failure (pre-LVAD)	iPSC-CVPC	11.1794105521855	2.31220419695071	1.33173642058069e-06	0.0387668472031039
ENST00000480254.1_2	ENSG00000204304.12_6	PBX2	Isoform	Heart failure (pre-LVAD)	iPSC-CVPC	11.9339990613772	2.27363096949467	1.53032944654638e-07	0.00445478901889651
ENST00000480340.1_2	ENSG00000198837.10_7	DENND4B	Isoform	Heart failure (pre-LVAD)	iPSC-CVPC	33.4128232743406	5.04876151879205	3.64032729266563e-11	1.05969927489497e-06
ENST00000481170.1_1	ENSG00000144591.19_5	GMPPA	Isoform	Heart failure (pre-LVAD)	iPSC-CVPC	8.10817850186207	1.68442732393343	1.48226940601835e-06	0.0431488624091942
ENST00000481623.2_3	ENSG00000159658.13_6	EFCAB14	Isoform	Heart failure (pre-LVAD)	iPSC-CVPC	43.1935773504453	8.88955451759635	1.18031623421984e-06	0.0343590055781395
ENST00000481782.1_1	ENSG00000132780.17_7	NASP	Isoform	Heart failure (pre-LVAD)	iPSC-CVPC	6.857744134877	1.3239642214908	2.22237032836598e-07	0.00646932002587337
ENST00000481787.6_2	ENSG00000134905.17_6	CARS2	Isoform	Heart failure (pre-LVAD)	iPSC-CVPC	-66.3500117417267	10.0376125027344	3.83959882368074e-11	1.11770721757346e-06
ENST00000482091.1_2	ENSG00000067064.11_6	IDI1	Isoform	Heart failure (pre-LVAD)	iPSC-CVPC	33.8007594262282	4.73471131015929	9.40621215629359e-13	2.73814835869706e-08
ENST00000482262.1_1	ENSG00000145050.19_6	MANF	Isoform	Heart failure (pre-LVAD)	iPSC-CVPC	36.8841544493061	7.30503635697109	4.43802407689642e-07	0.0129190880878455
ENST00000483048.1_2	ENSG00000076356.7_5	PLXNA2	Isoform	Heart failure (pre-LVAD)	iPSC-CVPC	22.5875732151887	3.84259009453486	4.14712442264815e-09	0.000120722791943288
ENST00000483056.5_2	ENSG00000188938.17_8	FAM120AOS	Isoform	Heart failure (pre-LVAD)	iPSC-CVPC	39.3056200348028	8.07330128487883	1.12395490342053e-06	0.0327183272385716
ENST00000484975.5_2	ENSG00000101473.17_6	ACOT8	Isoform	Heart failure (pre-LVAD)	iPSC-CVPC	15.8732656954379	2.19766517675049	5.09330621209594e-13	1.48266143834113e-08
ENST00000485135.1_1	ENSG00000163472.19_6	TMEM79	Isoform	Heart failure (pre-LVAD)	iPSC-CVPC	56.2415781778529	5.21216764530164	3.81959674830383e-27	1.11188461343125e-22
ENST00000485245.2_2	ENSG00000075568.17_5	TMEM131	Isoform	Heart failure (pre-LVAD)	iPSC-CVPC	4.96608591556782	0.954277924018938	1.95018037864904e-07	0.00567697508224736
ENST00000485462.5_1	ENSG00000163050.17_6	COQ8A	Isoform	Heart failure (pre-LVAD)	iPSC-CVPC	69.6829986380855	12.7227066758786	4.32456220575268e-08	0.00125888005809461
ENST00000485807.1_2	ENSG00000081692.12_5	JMJD4	Isoform	Heart failure (pre-LVAD)	iPSC-CVPC	20.7670378523433	3.21043457189479	9.89108125749033e-11	2.87929375405544e-06
ENST00000486056.1_1	ENSG00000107175.12_5	CREB3	Isoform	Heart failure (pre-LVAD)	iPSC-CVPC	-35.8990209568156	7.42306549662811	1.32381381836327e-06	0.0385362202525548
ENST00000487832.6_1	ENSG00000111832.13_8	RWDD1	Isoform	Heart failure (pre-LVAD)	iPSC-CVPC	40.053350710119	8.07442122470302	7.03037027368876e-07	0.020465407866708
ENST00000488097.2_1	ENSG00000163444.12_4	TMEM183A	Isoform	Heart failure (pre-LVAD)	iPSC-CVPC	19.6268472168958	3.80199640706623	2.44002118212326e-07	0.00710290166116081
ENST00000488687.5_2	ENSG00000068878.15_5	PSME4	Isoform	Heart failure (pre-LVAD)	iPSC-CVPC	6.04636414179704	1.14659801914622	1.33986651631921e-07	0.00390035142900522
ENST00000488770.1_2	ENSG00000050393.11_7	MCUR1	Isoform	Heart failure (pre-LVAD)	iPSC-CVPC	36.1293324633147	4.26447786065796	2.40887003080123e-17	7.01222065966238e-13
ENST00000489264.2_1	ENSG00000196968.11_5	FUT11	Isoform	Heart failure (pre-LVAD)	iPSC-CVPC	33.7047515637637	6.59891337799381	3.26239394203905e-07	0.00949682876527567
ENST00000489294.2_2	ENSG00000152332.16_4	UHMK1	Isoform	Heart failure (pre-LVAD)	iPSC-CVPC	-124.129583034249	23.0019668103353	6.79621489891705e-08	0.00197837815707475
ENST00000489724.2_2	ENSG00000171135.15_8	JAGN1	Isoform	Heart failure (pre-LVAD)	iPSC-CVPC	69.801424443191	14.3534109680268	1.15587815032419e-06	0.0336476129559372
ENST00000489785.5_1	ENSG00000122873.12_4	CISD1	Isoform	Heart failure (pre-LVAD)	iPSC-CVPC	-33.4652351926255	5.33554748413053	3.56147276422581e-10	1.03674472166613e-05
ENST00000489878.1_1	ENSG00000143479.17_6	DYRK3	Isoform	Heart failure (pre-LVAD)	iPSC-CVPC	37.0510817706566	4.93776168552919	6.20796336453333e-14	1.80713813541565e-09
ENST00000490106.1_1	ENSG00000091542.9_4	ALKBH5	Isoform	Heart failure (pre-LVAD)	iPSC-CVPC	52.9896706035199	10.1651910520035	1.85955891292661e-07	0.00541317599552936
ENST00000490552.1_2	ENSG00000115464.15_6	USP34	Isoform	Heart failure (pre-LVAD)	iPSC-CVPC	10.7120444784736	1.41893357035206	4.37392490351739e-14	1.27324953941391e-09
ENST00000491690.1_4	ENSG00000173230.15_9	GOLGB1	Isoform	Heart failure (pre-LVAD)	iPSC-CVPC	34.7074494911187	7.12500424413434	1.10912336126273e-06	0.0322865810463581
ENST00000491969.5_1	ENSG00000198874.13_4	TYW1	Isoform	Heart failure (pre-LVAD)	iPSC-CVPC	50.4593813216002	4.9657522000059	2.94576794986166e-24	8.57513050204729e-20
ENST00000492342.1_2	ENSG00000213676.13_8	ATF6B	Isoform	Heart failure (pre-LVAD)	iPSC-CVPC	15.8892478207734	2.64124845943818	1.78989862349803e-09	5.21039489300277e-05
ENST00000492549.5_2	ENSG00000128609.15_5	NDUFA5	Isoform	Heart failure (pre-LVAD)	iPSC-CVPC	-36.5888732279773	5.030844106094	3.51826386025973e-13	1.02416660972161e-08
ENST00000493062.5_2	ENSG00000137776.17_6	SLTM	Isoform	Heart failure (pre-LVAD)	iPSC-CVPC	-34.4109600011188	7.06813233177331	1.12468023904955e-06	0.0327394417587324
ENST00000493090.5_2	ENSG00000244687.12_5	UBE2V1	Isoform	Heart failure (pre-LVAD)	iPSC-CVPC	9.94570774002728	2.02135539867871	8.64045019541382e-07	0.0251523505188496
ENST00000493587.1_1	ENSG00000132549.18_7	VPS13B	Isoform	Heart failure (pre-LVAD)	iPSC-CVPC	46.5421007682122	8.44820428985184	3.60649089265355e-08	0.00104984949885145
ENST00000493886.5_2	ENSG00000165280.16_7	VCP	Isoform	Heart failure (pre-LVAD)	iPSC-CVPC	12.2510188493903	1.59022717998258	1.31931171442098e-14	3.84051640067947e-10
ENST00000494981.1_1	ENSG00000182979.18_8	MTA1	Isoform	Heart failure (pre-LVAD)	iPSC-CVPC	30.4208812410177	4.67747745350382	7.83713274380267e-11	2.28138934172096e-06
ENST00000495096.5_2	ENSG00000099889.14_6	ARVCF	Isoform	Heart failure (pre-LVAD)	iPSC-CVPC	45.5215066746742	6.62322345249834	6.28594501862246e-12	1.829838594921e-07
ENST00000496638.1_2	ENSG00000165507.9_9	DEPP1	Isoform	Heart failure (pre-LVAD)	iPSC-CVPC	21.5862729907653	3.58799460342855	1.78503686585977e-09	5.19624231651779e-05
ENST00000496696.5_1	ENSG00000106245.11_4	BUD31	Isoform	Heart failure (pre-LVAD)	iPSC-CVPC	61.1825335643251	10.6339465076119	8.74084974906124e-09	0.000254446136195173
ENST00000496706.1_2	ENSG00000108953.17_5	YWHAE	Isoform	Heart failure (pre-LVAD)	iPSC-CVPC	8.749628505081	1.66125065757699	1.38752457897838e-07	0.00403908404940606
ENST00000497547.2_2	ENSG00000160214.13_4	RRP1	Isoform	Heart failure (pre-LVAD)	iPSC-CVPC	-84.4329884472633	16.9220808224162	6.05308454794058e-07	0.017620529119055
ENST00000498088.1_1	ENSG00000172458.4_4	IL17D	Isoform	Heart failure (pre-LVAD)	iPSC-CVPC	56.3449559264664	6.15780403508071	5.68438375943782e-20	1.65472411237235e-15
ENST00000498376.1_1	ENSG00000164068.16_4	RNF123	Isoform	Heart failure (pre-LVAD)	iPSC-CVPC	44.4295229152065	8.16062989518529	5.19878272615289e-08	0.00151336565158311
ENST00000499527.6_2	ENSG00000152990.14_6	ADGRA3	Isoform	Heart failure (pre-LVAD)	iPSC-CVPC	12.2139540567659	2.53744431313648	1.48319592687683e-06	0.0431758334313845
ENST00000503290.1_1	ENSG00000129116.19_8	PALLD	Isoform	Heart failure (pre-LVAD)	iPSC-CVPC	8.81028306073008	1.7716523773835	6.59523586172838e-07	0.0191987315934913
ENST00000503614.5_3	ENSG00000005882.12_7	PDK2	Isoform	Heart failure (pre-LVAD)	iPSC-CVPC	28.4257171340746	5.29433704739995	7.91394782036561e-08	0.00230375021050843
ENST00000504110.2_4	ENSG00000164096.13_6	C4orf3	Isoform	Heart failure (pre-LVAD)	iPSC-CVPC	16.3660398663719	3.3346730194795	9.20851767506164e-07	0.0268059949521044
ENST00000504154.6_4	ENSG00000145147.20_9	SLIT2	Isoform	Heart failure (pre-LVAD)	iPSC-CVPC	-68.2844853379886	10.5486566985074	9.58933754698086e-11	2.79145615992613e-06
ENST00000504293.5_2	ENSG00000186468.13_6	RPS23	Isoform	Heart failure (pre-LVAD)	iPSC-CVPC	26.495232785477	3.54263542447657	7.49124009351685e-14	2.18069999122276e-09
ENST00000504541.1_1	ENSG00000188153.14_6	COL4A5	Isoform	Heart failure (pre-LVAD)	iPSC-CVPC	56.6574678831899	11.5369753523143	9.06378511928975e-07	0.0263846784822525
ENST00000505252.1_2	ENSG00000145782.13_7	ATG12	Isoform	Heart failure (pre-LVAD)	iPSC-CVPC	8.50508373093914	1.51381338491043	1.92826291383432e-08	0.000561317334217171
ENST00000505330.5_1	ENSG00000017260.19_8	ATP2C1	Isoform	Heart failure (pre-LVAD)	iPSC-CVPC	31.9641819467641	5.38746119912062	2.97322840339085e-09	8.65506788227076e-05
ENST00000505615.1_1	ENSG00000038427.16_6	VCAN	Isoform	Heart failure (pre-LVAD)	iPSC-CVPC	39.7872268721495	5.32480042803879	7.8949151766797e-14	2.29820980793146e-09
ENST00000506302.1_2	ENSG00000109445.11_6	ZNF330	Isoform	Heart failure (pre-LVAD)	iPSC-CVPC	40.7273958029082	7.17648590264571	1.38594048561642e-08	0.00040344727536294
ENST00000506409.1_1	ENSG00000118579.13_5	MED28	Isoform	Heart failure (pre-LVAD)	iPSC-CVPC	-77.3805528042603	14.1583268218297	4.61931537624932e-08	0.00134468270602618
ENST00000506838.5_2	ENSG00000215375.6_4	MYL5	Isoform	Heart failure (pre-LVAD)	iPSC-CVPC	27.6118760602986	4.61886819895649	2.25809120238251e-09	6.57330349013549e-05
ENST00000507110.6_2	ENSG00000112996.11_5	MRPS30	Isoform	Heart failure (pre-LVAD)	iPSC-CVPC	-52.0898214202742	10.72977596535	1.20570375903607e-06	0.03509803642554
ENST00000507213.1_2	ENSG00000171497.5_5	PPID	Isoform	Heart failure (pre-LVAD)	iPSC-CVPC	23.7484218374232	2.55615677735869	1.53312936893549e-20	4.46293959297121e-16
ENST00000507606.3_2	ENSG00000243317.8_5	STMP1	Isoform	Heart failure (pre-LVAD)	iPSC-CVPC	-36.9499329152988	5.83219781054959	2.36561321241263e-10	6.88630006133317e-06
ENST00000507868.5_2	ENSG00000113648.16_5	MACROH2A1	Isoform	Heart failure (pre-LVAD)	iPSC-CVPC	-55.1061310988513	6.96090132961709	2.44245808675182e-15	7.10999549053455e-11
ENST00000508126.1_1	ENSG00000175093.5_4	SPSB4	Isoform	Heart failure (pre-LVAD)	iPSC-CVPC	87.4680432260835	17.6096059113902	6.79740874621144e-07	0.0197872568602215
ENST00000508154.1_2	ENSG00000164253.14_9	WDR41	Isoform	Heart failure (pre-LVAD)	iPSC-CVPC	13.6351982073694	2.50154564020536	5.01693061125454e-08	0.0014604285009362
ENST00000508216.5_1	ENSG00000163110.15_8	PDLIM5	Isoform	Heart failure (pre-LVAD)	iPSC-CVPC	35.7401852413518	4.51544481918217	2.47059737227474e-15	7.19190895069177e-11
ENST00000508716.1_3	ENSG00000039123.16_6	MTREX	Isoform	Heart failure (pre-LVAD)	iPSC-CVPC	8.2498427605099	1.2547804988972	4.87415924262861e-11	1.41886775552919e-06
ENST00000509448.5_1	ENSG00000243317.8_5	STMP1	Isoform	Heart failure (pre-LVAD)	iPSC-CVPC	37.8088513956271	5.54563330493282	9.24646308673112e-12	2.69164540454743e-07
ENST00000509581.5_2	ENSG00000249915.8_5	PDCD6	Isoform	Heart failure (pre-LVAD)	iPSC-CVPC	9.15394889427941	1.65657382035848	3.27927514756675e-08	0.000954596995456681
ENST00000511503.1_1	ENSG00000130396.20_8	AFDN	Isoform	Heart failure (pre-LVAD)	iPSC-CVPC	17.487193126295	2.19452168268477	1.60524792868518e-15	4.67287672040256e-11
ENST00000511594.5_2	ENSG00000163291.14_4	PAQR3	Isoform	Heart failure (pre-LVAD)	iPSC-CVPC	28.0258642352612	5.23164133740443	8.46185575135382e-08	0.0024632462092191
ENST00000511664.6_5	ENSG00000145349.17_8	CAMK2D	Isoform	Heart failure (pre-LVAD)	iPSC-CVPC	10.8266131640513	2.21654949158461	1.03720806581672e-06	0.0301931267959247
ENST00000512493.5_2	ENSG00000186468.13_6	RPS23	Isoform	Heart failure (pre-LVAD)	iPSC-CVPC	-26.8307677592113	3.23624664567621	1.12578739621019e-16	3.27716711036786e-12
ENST00000512733.5_3	ENSG00000163291.14_4	PAQR3	Isoform	Heart failure (pre-LVAD)	iPSC-CVPC	32.3140074447269	3.07153104946108	6.95121566229245e-26	2.02349887929333e-21
ENST00000513574.1_2	ENSG00000164116.16_5	GUCY1A1	Isoform	Heart failure (pre-LVAD)	iPSC-CVPC	27.8277283882431	4.32709090437203	1.26727307507927e-10	3.68903192155576e-06
ENST00000513911.5_2	ENSG00000072832.15_6	CRMP1	Isoform	Heart failure (pre-LVAD)	iPSC-CVPC	71.1011948498061	6.70995620930779	3.09763605390588e-26	9.01721855292002e-22
ENST00000514463.1_2	ENSG00000070476.15_5	ZXDC	Isoform	Heart failure (pre-LVAD)	iPSC-CVPC	16.8530154536568	2.68417029157861	3.41484811859135e-10	9.94062287321942e-06
ENST00000514518.1_1	ENSG00000164615.5_4	CAMLG	Isoform	Heart failure (pre-LVAD)	iPSC-CVPC	70.0520711860803	12.9854351563457	6.86515555754599e-08	0.00199844678280164
ENST00000514808.5_1	ENSG00000159199.14_6	ATP5MC1	Isoform	Heart failure (pre-LVAD)	iPSC-CVPC	46.8163876895186	8.0949563541969	7.32047923049049e-09	0.000213099150399578
ENST00000514951.5_1	ENSG00000172062.16_4	SMN1	Isoform	Heart failure (pre-LVAD)	iPSC-CVPC	15.16365475571	3.1690727199627	1.71083584840067e-06	0.0498024315469435
ENST00000514985.6_3	ENSG00000250722.6_9	SELENOP	Isoform	Heart failure (pre-LVAD)	iPSC-CVPC	-56.107930811361	10.6128029148576	1.24464069012579e-07	0.00362314904895617
ENST00000515468.1_4	ENSG00000118816.10_8	CCNI	Isoform	Heart failure (pre-LVAD)	iPSC-CVPC	32.8022363096494	6.83348427701304	1.5849045082821e-06	0.0461365702360919
ENST00000515535.1_1	ENSG00000176293.19_3	ZNF135	Isoform	Heart failure (pre-LVAD)	iPSC-CVPC	55.7723652136936	6.31486359045006	1.02894732649776e-18	2.99526566743498e-14
ENST00000515591.1_1	ENSG00000134851.13_5	TMEM165	Isoform	Heart failure (pre-LVAD)	iPSC-CVPC	8.91377845871911	1.42020216269549	3.4646818118327e-10	1.0085688754245e-05
ENST00000517682.6_4	ENSG00000164919.11_7	COX6C	Isoform	Heart failure (pre-LVAD)	iPSC-CVPC	30.7148632729504	6.390026542179	1.5345125716464e-06	0.0446696609606267
ENST00000518352.1_1	ENSG00000066855.16_6	MTFR1	Isoform	Heart failure (pre-LVAD)	iPSC-CVPC	30.3164921719976	5.15550636441372	4.09251009122994e-09	0.000119132968755704
ENST00000518467.1_1	ENSG00000171033.13_4	PKIA	Isoform	Heart failure (pre-LVAD)	iPSC-CVPC	70.0545827264511	9.25044467934076	3.64409388488015e-14	1.06079572988861e-09
ENST00000520262.6_3	ENSG00000168575.10_6	SLC20A2	Isoform	Heart failure (pre-LVAD)	iPSC-CVPC	-60.1821615519721	11.8083677070165	3.45864419779935e-07	0.0100681132597939
ENST00000521026.5_2	ENSG00000104419.16_10	NDRG1	Isoform	Heart failure (pre-LVAD)	iPSC-CVPC	59.6779888584791	12.2802844137951	1.17588393555208e-06	0.0342299813639211
ENST00000521233.1_2	ENSG00000196591.12_6	HDAC2	Isoform	Heart failure (pre-LVAD)	iPSC-CVPC	-34.7969492687714	4.46092857462895	6.1719802718951e-15	1.79666345714866e-10
ENST00000522025.6_4	ENSG00000132561.14_8	MATN2	Isoform	Heart failure (pre-LVAD)	iPSC-CVPC	36.8040356277328	7.01903542136024	1.57592480137262e-07	0.0045875170967957
ENST00000522073.5_1	ENSG00000113312.11_5	TTC1	Isoform	Heart failure (pre-LVAD)	iPSC-CVPC	28.5607557893957	3.57930584356941	1.47032097369293e-15	4.28010435442012e-11
ENST00000522663.5_2	ENSG00000161010.15_8	MRNIP	Isoform	Heart failure (pre-LVAD)	iPSC-CVPC	29.8620970860667	5.43553907029966	3.93239646094116e-08	0.00114472060977997
ENST00000523248.1_1	ENSG00000104213.13_4	PDGFRL	Isoform	Heart failure (pre-LVAD)	iPSC-CVPC	52.1028441819417	9.51473862876017	4.35012707758411e-08	0.00126632199228473
ENST00000524611.2_3	ENSG00000166340.17_7	TPP1	Isoform	Heart failure (pre-LVAD)	iPSC-CVPC	38.7303246332068	7.38593942624357	1.57310161514957e-07	0.0045792988017004
ENST00000525902.5_1	ENSG00000198561.15_8	CTNND1	Isoform	Heart failure (pre-LVAD)	iPSC-CVPC	56.1569208003405	11.0350937148346	3.60072055908705e-07	0.0104816975475024
ENST00000525946.5_1	ENSG00000134910.14_7	STT3A	Isoform	Heart failure (pre-LVAD)	iPSC-CVPC	19.2434060689167	2.93099829926508	5.18660663902958e-11	1.50982119262151e-06
ENST00000526072.5_1	ENSG00000110651.12_6	CD81	Isoform	Heart failure (pre-LVAD)	iPSC-CVPC	44.378601561894	6.95665414104346	1.77896271767452e-10	5.17856047115053e-06
ENST00000526506.5_1	ENSG00000124440.15_3	HIF3A	Isoform	Heart failure (pre-LVAD)	iPSC-CVPC	10.1369078761378	1.94595326464815	1.89631313869494e-07	0.00552016754674097
ENST00000527076.1_1	ENSG00000090581.10_5	GNPTG	Isoform	Heart failure (pre-LVAD)	iPSC-CVPC	11.4036713083608	2.01275103970814	1.46413748214663e-08	0.000426210421052884
ENST00000527158.2_1	ENSG00000184209.15_5	SNRNP35	Isoform	Heart failure (pre-LVAD)	iPSC-CVPC	32.9643094784786	3.38076314955426	1.83466537806937e-22	5.34071091555994e-18
ENST00000527168.5_1	ENSG00000090581.10_5	GNPTG	Isoform	Heart failure (pre-LVAD)	iPSC-CVPC	21.5208747358023	4.32763133827821	6.59589366906863e-07	0.0192006464706588
ENST00000527211.5_1	ENSG00000149091.15_7	DGKZ	Isoform	Heart failure (pre-LVAD)	iPSC-CVPC	12.6530220066018	2.28465705837684	3.05493645440933e-08	0.000889292001878556
ENST00000527432.5_1	ENSG00000119707.14_5	RBM25	Isoform	Heart failure (pre-LVAD)	iPSC-CVPC	60.886195981943	11.6383755073653	1.68137337254884e-07	0.00489447788748967
ENST00000527898.5_1	ENSG00000019144.19_9	PHLDB1	Isoform	Heart failure (pre-LVAD)	iPSC-CVPC	35.5691849373781	6.13988313310263	6.90836552686849e-09	0.000201102520487142
ENST00000527906.5_3	ENSG00000165916.8_8	PSMC3	Isoform	Heart failure (pre-LVAD)	iPSC-CVPC	20.73996858918	3.84613408259009	6.95152285877799e-08	0.00202358830419027
ENST00000528157.7_3	ENSG00000145050.19_6	MANF	Isoform	Heart failure (pre-LVAD)	iPSC-CVPC	-37.3472999280995	7.21352295185613	2.24998437938137e-07	0.00654970452837917
ENST00000529479.5_1	ENSG00000149476.15_4	TKFC	Isoform	Heart failure (pre-LVAD)	iPSC-CVPC	-35.5405572232599	7.01175159179667	4.00514376831244e-07	0.0116589735095575
ENST00000529565.1_2	ENSG00000196954.14_8	CASP4	Isoform	Heart failure (pre-LVAD)	iPSC-CVPC	10.23667271662	1.95442756119278	1.6260472213672e-07	0.00473342346139992
ENST00000530187.1_2	ENSG00000173599.15_7	PC	Isoform	Heart failure (pre-LVAD)	iPSC-CVPC	31.6688295896484	5.06936239194571	4.18135035389996e-10	1.21719108802028e-05
ENST00000530332.1_2	ENSG00000170619.10_7	COMMD5	Isoform	Heart failure (pre-LVAD)	iPSC-CVPC	32.569706391153	4.80527199044001	1.2192582584931e-11	3.54926079047341e-07
ENST00000530489.5_4	ENSG00000166689.16_7	PLEKHA7	Isoform	Heart failure (pre-LVAD)	iPSC-CVPC	-49.3240252095803	6.29289633370751	4.5760312674287e-15	1.33208270194849e-10
ENST00000530649.5_1	ENSG00000149591.17_5	TAGLN	Isoform	Heart failure (pre-LVAD)	iPSC-CVPC	-65.4227841146609	9.97798649234928	5.50070872992682e-11	1.6012563112817e-06
ENST00000531066.6_3	ENSG00000166689.16_7	PLEKHA7	Isoform	Heart failure (pre-LVAD)	iPSC-CVPC	-26.4668754769188	5.02658065423279	1.39896915041094e-07	0.00407239919684625
ENST00000531336.1_1	ENSG00000166311.10_7	SMPD1	Isoform	Heart failure (pre-LVAD)	iPSC-CVPC	22.5218837997338	4.2003752829857	8.23628998497294e-08	0.00239758401462562
ENST00000531469.5_2	ENSG00000175029.17_7	CTBP2	Isoform	Heart failure (pre-LVAD)	iPSC-CVPC	-129.135223802241	12.9929020969259	2.81907928594265e-23	8.20633980137905e-19
ENST00000533297.1_1	ENSG00000150768.16_3	DLAT	Isoform	Heart failure (pre-LVAD)	iPSC-CVPC	71.5958759365428	13.505745812396	1.15080552550563e-07	0.00334999488474689
ENST00000537123.2_4	ENSG00000130779.20_8	CLIP1	Isoform	Heart failure (pre-LVAD)	iPSC-CVPC	-33.1478027383664	4.63724329181625	8.79424516688719e-13	2.56000476808086e-08
ENST00000537332.2_3	ENSG00000164442.10_6	CITED2	Isoform	Heart failure (pre-LVAD)	iPSC-CVPC	107.459608508442	15.5253140184274	4.46652983128635e-12	1.30020683388746e-07
ENST00000538010.5_1	ENSG00000110987.9_3	BCL7A	Isoform	Heart failure (pre-LVAD)	iPSC-CVPC	34.9440141843988	3.30505023362742	3.97931265531239e-26	1.15837791396144e-21
ENST00000539002.5_2	ENSG00000109390.12_6	NDUFC1	Isoform	Heart failure (pre-LVAD)	iPSC-CVPC	23.0104115420986	4.75534615241477	1.30591893163815e-06	0.0380153000999866
ENST00000539409.5_2	ENSG00000139146.14_9	SINHCAF	Isoform	Heart failure (pre-LVAD)	iPSC-CVPC	48.7782610555396	8.36348061789307	5.46711368810864e-09	0.000159147679460843
ENST00000539966.5_3	ENSG00000102572.14_6	STK24	Isoform	Heart failure (pre-LVAD)	iPSC-CVPC	4.84334161607684	0.996358033395677	1.16767479071215e-06	0.0339910131576307
ENST00000540975.5_2	ENSG00000060138.13_8	YBX3	Isoform	Heart failure (pre-LVAD)	iPSC-CVPC	45.0932235293193	8.2575582453946	4.73880799055857e-08	0.0013794670060516
ENST00000541303.5_1	ENSG00000165458.14_8	INPPL1	Isoform	Heart failure (pre-LVAD)	iPSC-CVPC	24.6306477884124	4.77994617122146	2.56470674951128e-07	0.00746586134782733
ENST00000541652.5_2	ENSG00000089053.13_5	ANAPC5	Isoform	Heart failure (pre-LVAD)	iPSC-CVPC	61.067756956357	9.54987164734377	1.60951882612283e-10	4.68530930284356e-06
ENST00000542660.1_2	ENSG00000256377.6_9	AC009509.2	Isoform	Heart failure (pre-LVAD)	iPSC-CVPC	74.0470289153686	14.6128937831288	4.03626846134253e-07	0.0117495774909681
ENST00000542678.5_4	ENSG00000150967.18_9	ABCB9	Isoform	Heart failure (pre-LVAD)	iPSC-CVPC	58.0187301006018	7.30488714275635	1.98219878140648e-15	5.77018065267426e-11
ENST00000542698.1_1	ENSG00000111725.11_5	PRKAB1	Isoform	Heart failure (pre-LVAD)	iPSC-CVPC	11.8777995259896	2.08014232373728	1.12916558491483e-08	0.000328700101768707
ENST00000543039.2_1	ENSG00000213015.9_7	ZNF580	Isoform	Heart failure (pre-LVAD)	iPSC-CVPC	33.5139610287432	6.88346175607619	1.12297579024467e-06	0.0326898252540223
ENST00000543469.1_2	ENSG00000213186.8_6	TRIM59	Isoform	Heart failure (pre-LVAD)	iPSC-CVPC	75.4399388509007	4.9686499617697	4.57029346670208e-52	1.33041242815698e-47
ENST00000543491.2_2	ENSG00000169851.15_5	PCDH7	Isoform	Heart failure (pre-LVAD)	iPSC-CVPC	-25.1384636927403	4.40374567877864	1.14024613809313e-08	0.00033192565079891
ENST00000543772.2_2	ENSG00000100764.14_6	PSMC1	Isoform	Heart failure (pre-LVAD)	iPSC-CVPC	-23.9308511500738	3.96825019582425	1.63372046103239e-09	4.75576026206529e-05
ENST00000544271.1_2	ENSG00000002330.13_9	BAD	Isoform	Heart failure (pre-LVAD)	iPSC-CVPC	-25.8010683893067	4.1639674405523	5.7816749839315e-10	1.68304558782246e-05
ENST00000544313.5_1	ENSG00000076053.10_4	RBM7	Isoform	Heart failure (pre-LVAD)	iPSC-CVPC	50.9101497733522	10.4378396832225	1.0746040995145e-06	0.0312817253368671
ENST00000544909.5_2	ENSG00000175575.13_4	PAAF1	Isoform	Heart failure (pre-LVAD)	iPSC-CVPC	23.9873169126308	4.63325292039149	2.25230329081273e-07	0.00655645487955586
ENST00000545294.5_1	ENSG00000152332.16_4	UHMK1	Isoform	Heart failure (pre-LVAD)	iPSC-CVPC	119.922613421667	24.3161435518434	8.14709121874193e-07	0.0237161825377578
ENST00000545718.2_2	ENSG00000114650.20_8	SCAP	Isoform	Heart failure (pre-LVAD)	iPSC-CVPC	-49.6440387368514	9.53566765267522	1.92807248149483e-07	0.00561261899363145
ENST00000546139.5_1	ENSG00000173264.14_7	GPR137	Isoform	Heart failure (pre-LVAD)	iPSC-CVPC	22.3269647217711	3.91716119495806	1.19960758338981e-08	0.000349205767524774
ENST00000546741.2_6	ENSG00000057294.15_7	PKP2	Isoform	Heart failure (pre-LVAD)	iPSC-CVPC	6.38014877051812	1.05248950780514	1.3447308005585e-09	3.91451136042579e-05
ENST00000546769.1_2	ENSG00000057294.15_7	PKP2	Isoform	Heart failure (pre-LVAD)	iPSC-CVPC	25.752484312133	4.85585766379753	1.1367461862129e-07	0.00330906814806575
ENST00000546799.1_6	ENSG00000135414.10_8	GDF11	Isoform	Heart failure (pre-LVAD)	iPSC-CVPC	-83.5378531200479	14.0184689443374	2.53587162076691e-09	7.38192228805248e-05
ENST00000547315.6_5	ENSG00000140104.14_7	CLBA1	Isoform	Heart failure (pre-LVAD)	iPSC-CVPC	-101.508760891916	20.4291544669906	6.73620801965434e-07	0.0196091015452138
ENST00000547530.7_6	ENSG00000185024.17_10	BRF1	Isoform	Heart failure (pre-LVAD)	iPSC-CVPC	-60.036838317253	9.85404401219176	1.11085079613909e-09	3.23368666756089e-05
ENST00000547534.5_1	ENSG00000075415.13_8	SLC25A3	Isoform	Heart failure (pre-LVAD)	iPSC-CVPC	-53.0468659150369	7.17539980661328	1.4368271356308e-13	4.18260379182126e-09
ENST00000547708.5_1	ENSG00000135486.18_4	HNRNPA1	Isoform	Heart failure (pre-LVAD)	iPSC-CVPC	-17.600184367059	3.56125866784235	7.72757677943756e-07	0.0224949760049427
ENST00000547798.1_4	ENSG00000139644.13_9	TMBIM6	Isoform	Heart failure (pre-LVAD)	iPSC-CVPC	-77.4082506593995	10.4374969295318	1.2038161792542e-13	3.50430889780898e-09
ENST00000548326.1_1	ENSG00000111786.9_5	SRSF9	Isoform	Heart failure (pre-LVAD)	iPSC-CVPC	20.7926913129318	1.98950669815672	1.44714362746109e-25	4.21263509953923e-21
ENST00000548480.1_1	ENSG00000075415.13_8	SLC25A3	Isoform	Heart failure (pre-LVAD)	iPSC-CVPC	14.5274933867551	2.25317265479507	1.1365602778262e-10	3.30852696875207e-06
ENST00000548806.1_1	ENSG00000151135.10_4	TMEM263	Isoform	Heart failure (pre-LVAD)	iPSC-CVPC	31.8196950488191	2.8213949796831	1.68532306857521e-29	4.90597545262244e-25
ENST00000549135.1_1	ENSG00000205352.11_8	PRR13	Isoform	Heart failure (pre-LVAD)	iPSC-CVPC	35.715779501287	5.19154041278325	6.00161396444776e-12	1.74706982505074e-07
ENST00000549388.1_2	ENSG00000257337.7_8	AC068888.1	Isoform	Heart failure (pre-LVAD)	iPSC-CVPC	30.2048050369366	6.24907934839743	1.34166225528758e-06	0.0390557882514214
ENST00000549524.1_1	ENSG00000139437.18_5	TCHP	Isoform	Heart failure (pre-LVAD)	iPSC-CVPC	44.9086492048847	2.41454834679206	3.26184816404761e-77	9.49524000554259e-73
ENST00000550422.5_3	ENSG00000174233.11_5	ADCY6	Isoform	Heart failure (pre-LVAD)	iPSC-CVPC	-36.0247990311633	7.14511256063892	4.60980713782051e-07	0.0134191485781955
ENST00000551917.5_2	ENSG00000075415.13_8	SLC25A3	Isoform	Heart failure (pre-LVAD)	iPSC-CVPC	49.2401340512288	6.57999215988435	7.24725698133978e-14	2.10967650726801e-09
ENST00000552656.5_2	ENSG00000181852.18_6	RNF41	Isoform	Heart failure (pre-LVAD)	iPSC-CVPC	-43.4865210373077	8.98651060604373	1.3043589216889e-06	0.0379698882103639
ENST00000553300.5_3	ENSG00000092199.17_9	HNRNPC	Isoform	Heart failure (pre-LVAD)	iPSC-CVPC	-29.2030764972062	4.78278083847326	1.02237055595652e-09	2.97612068838943e-05
ENST00000553660.5_2	ENSG00000100528.12_6	CNIH1	Isoform	Heart failure (pre-LVAD)	iPSC-CVPC	-33.5945213216067	6.85676691199299	9.60956966466428e-07	0.0279734572938377
ENST00000553882.1_2	ENSG00000072110.13_7	ACTN1	Isoform	Heart failure (pre-LVAD)	iPSC-CVPC	10.1317932629523	1.88158046885203	7.25555190522899e-08	0.00211209115961216
ENST00000553972.5_2	ENSG00000165914.15_6	TTC7B	Isoform	Heart failure (pre-LVAD)	iPSC-CVPC	-30.3795289125728	5.88247239441748	2.41191993650125e-07	0.00702109893515514
ENST00000554107.2_3	ENSG00000119596.18_7	YLPM1	Isoform	Heart failure (pre-LVAD)	iPSC-CVPC	9.75395368495268	1.82840375052884	9.57118252999086e-08	0.00278617123448034
ENST00000554156.5_1	ENSG00000100591.8_6	AHSA1	Isoform	Heart failure (pre-LVAD)	iPSC-CVPC	-33.0247200521039	6.20793809535841	1.03906132001173e-07	0.00302470750255415
ENST00000554332.1_1	ENSG00000134001.14_7	EIF2S1	Isoform	Heart failure (pre-LVAD)	iPSC-CVPC	32.2538358255034	6.7219079456518	1.60005513398041e-06	0.0465776049501697
ENST00000554364.1_1	ENSG00000168175.15_4	MAPK1IP1L	Isoform	Heart failure (pre-LVAD)	iPSC-CVPC	73.8956835974981	13.9641242953628	1.21102622270536e-07	0.0035252973342953
ENST00000554812.5_1	ENSG00000100567.13_6	PSMA3	Isoform	Heart failure (pre-LVAD)	iPSC-CVPC	5.38240025461562	0.976285722480616	3.52486825764808e-08	0.00102608914980136
ENST00000554892.1_2	ENSG00000213983.12_6	AP1G2	Isoform	Heart failure (pre-LVAD)	iPSC-CVPC	29.3358232461364	5.07852658674404	7.62959850836801e-09	0.000222097612578593
ENST00000555049.5_2	ENSG00000090061.17_6	CCNK	Isoform	Heart failure (pre-LVAD)	iPSC-CVPC	-46.0309510080178	8.44837294296463	5.07966946318355e-08	0.00147869178073273
ENST00000555062.2_2	ENSG00000197102.12_8	DYNC1H1	Isoform	Heart failure (pre-LVAD)	iPSC-CVPC	15.4559825547296	1.92670491261431	1.0405660193495e-15	3.02908768232639e-11
ENST00000555355.5_5	ENSG00000100445.17_8	SDR39U1	Isoform	Heart failure (pre-LVAD)	iPSC-CVPC	17.0982181164574	1.91942801472526	5.19727845291516e-19	1.5129277576436e-14
ENST00000555558.1_2	ENSG00000119632.4_6	IFI27L2	Isoform	Heart failure (pre-LVAD)	iPSC-CVPC	22.3979826542338	4.42163815116848	4.07245345284321e-07	0.0118549120012266
ENST00000555679.5_1	ENSG00000100764.14_6	PSMC1	Isoform	Heart failure (pre-LVAD)	iPSC-CVPC	29.8711569766369	3.88996702477837	1.60303005966159e-14	4.66642050367489e-10
ENST00000556319.1_1	ENSG00000140553.18_6	UNC45A	Isoform	Heart failure (pre-LVAD)	iPSC-CVPC	27.3813886784868	2.5834839112866	3.02378959874466e-26	8.8022515219457e-22
ENST00000556724.1_1	ENSG00000134001.14_7	EIF2S1	Isoform	Heart failure (pre-LVAD)	iPSC-CVPC	-63.8596110613099	6.97907633181793	5.68533600837209e-20	1.65500131203712e-15
ENST00000556794.5_4	ENSG00000156050.10_7	FAM161B	Isoform	Heart failure (pre-LVAD)	iPSC-CVPC	53.1517322109765	5.36854596700451	4.13857481706313e-23	1.20473912924708e-18
ENST00000557894.5_1	ENSG00000213928.9_5	IRF9	Isoform	Heart failure (pre-LVAD)	iPSC-CVPC	-45.399362189526	7.6367556746299	2.76711184267949e-09	8.05506257404e-05
ENST00000558180.2_2	ENSG00000177508.12_5	IRX3	Isoform	Heart failure (pre-LVAD)	iPSC-CVPC	-80.4728270204803	14.2640215370728	1.68413814847856e-08	0.000490252615022109
ENST00000558353.1_2	ENSG00000104131.13_5	EIF3J	Isoform	Heart failure (pre-LVAD)	iPSC-CVPC	-81.1363881494121	10.5252181518256	1.27045367341154e-14	3.69829064330099e-10
ENST00000558666.1_1	ENSG00000138594.14_5	TMOD3	Isoform	Heart failure (pre-LVAD)	iPSC-CVPC	48.1187082250548	8.57632869278107	2.01577624870052e-08	0.000586792465996721
ENST00000559465.1_1	ENSG00000103855.18_4	CD276	Isoform	Heart failure (pre-LVAD)	iPSC-CVPC	45.5710946101102	7.52836133088309	1.41947457197139e-09	4.13209047900872e-05
ENST00000559619.5_1	ENSG00000185787.15_7	MORF4L1	Isoform	Heart failure (pre-LVAD)	iPSC-CVPC	-30.3228752775215	4.32635678613487	2.40249362605687e-12	6.99365894545155e-08
ENST00000559668.5_2	ENSG00000225151.10_6	GOLGA2P7	Isoform	Heart failure (pre-LVAD)	iPSC-CVPC	43.8213499565373	8.33508678459407	1.46062022600114e-07	0.00425186547788932
ENST00000559756.1_1	ENSG00000259605.3_8	AC074212.1	Isoform	Heart failure (pre-LVAD)	iPSC-CVPC	60.7477952983783	6.08236470509183	1.72836022288123e-23	5.03125660880726e-19
ENST00000559827.1_2	ENSG00000140471.17_5	LINS1	Isoform	Heart failure (pre-LVAD)	iPSC-CVPC	25.5156901845155	4.15754964263944	8.3991607191804e-10	2.44499568535341e-05
ENST00000560966.5_2	ENSG00000177082.13_7	WDR73	Isoform	Heart failure (pre-LVAD)	iPSC-CVPC	15.1384135086107	3.00725056343409	4.80421228834595e-07	0.0139850619713751
ENST00000561160.1_1	ENSG00000137880.6_4	GCHFR	Isoform	Heart failure (pre-LVAD)	iPSC-CVPC	18.8543690996831	3.42221832675534	3.60059200291725e-08	0.00104813233204921
ENST00000561609.5_2	ENSG00000067225.18_7	PKM	Isoform	Heart failure (pre-LVAD)	iPSC-CVPC	27.5323979517333	3.55522965150637	9.61879596364922e-15	2.80003150501829e-10
ENST00000562828.5_2	ENSG00000103121.9_5	CMC2	Isoform	Heart failure (pre-LVAD)	iPSC-CVPC	-42.2167883556953	8.50047217310747	6.82054055438225e-07	0.0198545935538067
ENST00000562879.5_1	ENSG00000167526.13_5	RPL13	Isoform	Heart failure (pre-LVAD)	iPSC-CVPC	18.7723341846399	2.98383350493337	3.14721415070242e-10	9.16154039269474e-06
ENST00000563963.1_1	ENSG00000137822.13_3	TUBGCP4	Isoform	Heart failure (pre-LVAD)	iPSC-CVPC	11.4547345844074	1.74746835063596	5.56249061279475e-11	1.61924101738455e-06
ENST00000564376.1_2	ENSG00000102934.10_5	PLLP	Isoform	Heart failure (pre-LVAD)	iPSC-CVPC	66.2502358911509	13.0805610939796	4.08860502258198e-07	0.0119019292207361
ENST00000564969.5_2	ENSG00000187741.15_8	FANCA	Isoform	Heart failure (pre-LVAD)	iPSC-CVPC	51.4431189021367	5.38773477117763	1.31981059857699e-21	3.84196865245762e-17
ENST00000564996.6_2	ENSG00000135686.13_5	KLHL36	Isoform	Heart failure (pre-LVAD)	iPSC-CVPC	-72.1345163552492	13.9081094927788	2.14274219938753e-07	0.0062375225424171
ENST00000565117.1_1	ENSG00000058600.16_8	POLR3E	Isoform	Heart failure (pre-LVAD)	iPSC-CVPC	27.7940873559318	5.80663631664395	1.69624332307574e-06	0.0493776431347348
ENST00000565990.2_1	ENSG00000189091.13_6	SF3B3	Isoform	Heart failure (pre-LVAD)	iPSC-CVPC	-22.3200698816674	4.52126664688015	7.94616012121224e-07	0.0231312721128488
ENST00000566515.5_1	ENSG00000166946.14_5	CCNDBP1	Isoform	Heart failure (pre-LVAD)	iPSC-CVPC	-43.4006288820445	6.54950770899767	3.43627175769824e-11	1.00029870866596e-06
ENST00000566621.6_5	ENSG00000186073.14_8	C15orf41	Isoform	Heart failure (pre-LVAD)	iPSC-CVPC	-77.8957558280781	11.6988354876556	2.76787578569052e-11	8.05728641214511e-07
ENST00000566719.1_1	ENSG00000102910.14_5	LONP2	Isoform	Heart failure (pre-LVAD)	iPSC-CVPC	21.2715714946033	3.51379715006107	1.41531687303424e-09	4.11998741740267e-05
ENST00000567024.1_2	ENSG00000168488.18_7	ATXN2L	Isoform	Heart failure (pre-LVAD)	iPSC-CVPC	42.6586545086248	7.42138185843542	9.02655622402766e-09	0.000262763051681445
ENST00000567171.1_1	ENSG00000141002.20_6	TCF25	Isoform	Heart failure (pre-LVAD)	iPSC-CVPC	6.61863796371467	0.990031677697288	2.30485137723947e-11	6.7094223591441e-07
ENST00000568325.1_2	ENSG00000159461.15_7	AMFR	Isoform	Heart failure (pre-LVAD)	iPSC-CVPC	-48.5763726882026	9.57633545371242	3.9253454540441e-07	0.0114266806167224
ENST00000568470.6_2	ENSG00000172831.14_7	CES2	Isoform	Heart failure (pre-LVAD)	iPSC-CVPC	-70.3228888415496	7.16288137994805	9.44916163684317e-23	2.75065095248505e-18
ENST00000568604.5_2	ENSG00000166912.17_5	MTMR10	Isoform	Heart failure (pre-LVAD)	iPSC-CVPC	29.6743574724651	3.45791157657895	9.35757956045891e-18	2.72399141004959e-13
ENST00000568901.2_1	ENSG00000089280.19_3	FUS	Isoform	Heart failure (pre-LVAD)	iPSC-CVPC	17.0228795894313	2.937117647277	6.80054849728437e-09	0.000197963966755948
ENST00000570646.6_2	ENSG00000103415.12_6	HMOX2	Isoform	Heart failure (pre-LVAD)	iPSC-CVPC	-56.7993899952769	11.3982828993055	6.25563797057252e-07	0.0182101621323366
ENST00000571732.5_2	ENSG00000108953.17_5	YWHAE	Isoform	Heart failure (pre-LVAD)	iPSC-CVPC	10.9459366964881	2.13719276073819	3.02886152438683e-07	0.00881701589749006
ENST00000573266.5_1	ENSG00000182310.14_5	SPACA6	Isoform	Heart failure (pre-LVAD)	iPSC-CVPC	103.792714447421	21.1006252206745	8.70140285910711e-07	0.0253297837228608
ENST00000574501.1_1	ENSG00000070366.14_8	SMG6	Isoform	Heart failure (pre-LVAD)	iPSC-CVPC	26.5992647778412	3.76459440565561	1.59878640882925e-12	4.65406723610195e-08
ENST00000574668.1_2	ENSG00000167874.7_4	TMEM88	Isoform	Heart failure (pre-LVAD)	iPSC-CVPC	40.8922177209782	7.72331680004227	1.19248087459035e-07	0.00347131182593251
ENST00000575332.1_1	ENSG00000006194.10_5	ZNF263	Isoform	Heart failure (pre-LVAD)	iPSC-CVPC	34.4570310416282	3.14942651997962	7.36033376699989e-28	2.14259315957367e-23
ENST00000575829.6_3	ENSG00000149932.17_7	TMEM219	Isoform	Heart failure (pre-LVAD)	iPSC-CVPC	-33.5731537623541	6.37589632440228	1.39704308657405e-07	0.00406679242501706
ENST00000576505.6_5	ENSG00000079432.7_7	CIC	Isoform	Heart failure (pre-LVAD)	iPSC-CVPC	33.1230596092581	6.77139588449151	1.00012085833755e-06	0.0291135181862061
ENST00000576778.1_2	ENSG00000179409.11_8	GEMIN4	Isoform	Heart failure (pre-LVAD)	iPSC-CVPC	15.6762878749139	3.26299261480533	1.55319420509177e-06	0.0452134833102214
ENST00000577350.1_1	ENSG00000109016.17_6	DHRS7B	Isoform	Heart failure (pre-LVAD)	iPSC-CVPC	14.5015850024958	2.58043165887425	1.91146410780039e-08	0.000556427201780694
ENST00000577513.5_2	ENSG00000173065.13_7	FAM222B	Isoform	Heart failure (pre-LVAD)	iPSC-CVPC	18.2423613654343	3.10391998069988	4.17261649559883e-09	0.000121464866186882
ENST00000577733.5_1	ENSG00000169696.16_6	ASPSCR1	Isoform	Heart failure (pre-LVAD)	iPSC-CVPC	8.95384340934569	1.74867486478629	3.04954253951459e-07	0.00887721833252697
ENST00000577916.6_2	ENSG00000105655.19_8	ISYNA1	Isoform	Heart failure (pre-LVAD)	iPSC-CVPC	19.3247158172936	3.36850442263983	9.64348152736747e-09	0.000280721747261667
ENST00000577949.5_2	ENSG00000273173.5_8	SNURF	Isoform	Heart failure (pre-LVAD)	iPSC-CVPC	-118.131092366253	22.2548098816216	1.10764692493903e-07	0.00322436019849752
ENST00000578713.1	ENSG00000263563.1	UBBP4	Isoform	Heart failure (pre-LVAD)	iPSC-CVPC	-124.135704572123	17.7142278156371	2.42295880631683e-12	7.05323308518829e-08
ENST00000580987.1_1	ENSG00000206418.4_5	RAB12	Isoform	Heart failure (pre-LVAD)	iPSC-CVPC	10.9049729767075	2.21228205183245	8.25302944640857e-07	0.0240245687184954
ENST00000581122.2_3	ENSG00000108641.18_10	B9D1	Isoform	Heart failure (pre-LVAD)	iPSC-CVPC	24.2830734642204	3.86334908264353	3.26804082364568e-10	9.51326683763257e-06
ENST00000581958.5_1	ENSG00000233098.9_9	CCDC144NL-AS1	Isoform	Heart failure (pre-LVAD)	iPSC-CVPC	67.5628020347996	6.04976416420192	5.85878756968991e-29	1.70549306153673e-24
ENST00000582330.2_2	ENSG00000109066.14_4	TMEM104	Isoform	Heart failure (pre-LVAD)	iPSC-CVPC	105.314275306889	18.973201167349	2.84551361413721e-08	0.000828329013075342
ENST00000583796.1_1	ENSG00000109083.13_8	IFT20	Isoform	Heart failure (pre-LVAD)	iPSC-CVPC	21.7140639133315	3.06691734308454	1.44056429655863e-12	4.19348266728217e-08
ENST00000583931.6_5	ENSG00000143401.15_9	ANP32E	Isoform	Heart failure (pre-LVAD)	iPSC-CVPC	-54.0237239642797	11.0733434517962	1.06777408485626e-06	0.0310829036101657
ENST00000584570.5_1	ENSG00000180901.11_4	KCTD2	Isoform	Heart failure (pre-LVAD)	iPSC-CVPC	8.00250029135556	1.64275251860577	1.10811721594728e-06	0.0322572921562253
ENST00000584755.1	ENSG00000263563.1	UBBP4	Isoform	Heart failure (pre-LVAD)	iPSC-CVPC	98.4555556406709	16.3734552426481	1.81985912182188e-09	5.29760990362349e-05
ENST00000586483.1_2	ENSG00000267598.1_7	AC011446.2	Isoform	Heart failure (pre-LVAD)	iPSC-CVPC	191.141108504225	38.0621941166796	5.11867954801038e-07	0.0149004761642582
ENST00000586622.5_1	ENSG00000092931.11_4	MFSD11	Isoform	Heart failure (pre-LVAD)	iPSC-CVPC	33.9660427861357	2.03930070982732	2.74966762291197e-62	8.00428245029674e-58
ENST00000586748.5_2	ENSG00000130733.10_6	YIPF2	Isoform	Heart failure (pre-LVAD)	iPSC-CVPC	-55.5505160374939	8.56174474870691	8.68542014283442e-11	2.5283258035791e-06
ENST00000587090.5_3	ENSG00000167642.13_7	SPINT2	Isoform	Heart failure (pre-LVAD)	iPSC-CVPC	105.239229906603	17.2260811615976	1.00071535253282e-09	2.91308239122304e-05
ENST00000587091.6_3	ENSG00000147100.11_6	SLC16A2	Isoform	Heart failure (pre-LVAD)	iPSC-CVPC	-74.9307252664504	13.0135191853118	8.51596816054467e-09	0.000247899833153455
ENST00000587280.1_1	ENSG00000108786.10_3	HSD17B1	Isoform	Heart failure (pre-LVAD)	iPSC-CVPC	51.1213672986958	7.48527561653931	8.51573569893486e-12	2.47893066195994e-07
ENST00000587393.5_2	ENSG00000104964.15_5	TLE5	Isoform	Heart failure (pre-LVAD)	iPSC-CVPC	-50.583726505814	8.29768171563388	1.08668684975367e-09	3.16334541963293e-05
ENST00000587502.2_2	ENSG00000130332.15_7	LSM7	Isoform	Heart failure (pre-LVAD)	iPSC-CVPC	23.3212525079118	4.39484262676108	1.11747357249184e-07	0.00325296556952375
ENST00000588301.5_2	ENSG00000125743.10_4	SNRPD2	Isoform	Heart failure (pre-LVAD)	iPSC-CVPC	-24.1446284329653	3.811379076317	2.37526329045269e-10	6.91439143850778e-06
ENST00000588460.5_1	ENSG00000092931.11_4	MFSD11	Isoform	Heart failure (pre-LVAD)	iPSC-CVPC	30.1609174534542	2.63931735210449	3.04599520449379e-30	8.86689204028142e-26
ENST00000589503.1_2	ENSG00000105341.18_8	DMAC2	Isoform	Heart failure (pre-LVAD)	iPSC-CVPC	8.30091533323748	1.5304775262951	5.83640864555459e-08	0.00169897855672094
ENST00000589786.5_1	ENSG00000153885.14_5	KCTD15	Isoform	Heart failure (pre-LVAD)	iPSC-CVPC	-55.8065489229077	9.93871749949853	1.96487894436744e-08	0.000571976260705362
ENST00000590258.2_3	ENSG00000134779.15_6	TPGS2	Isoform	Heart failure (pre-LVAD)	iPSC-CVPC	44.177237167451	3.18504814138072	9.60161045236413e-44	2.7950288026832e-39
ENST00000591909.5_1	ENSG00000176014.13_5	TUBB6	Isoform	Heart failure (pre-LVAD)	iPSC-CVPC	30.0624204804934	3.94253667500245	2.43757039291794e-14	7.09576741378412e-10
ENST00000591978.1_1	ENSG00000105298.14_6	CACTIN	Isoform	Heart failure (pre-LVAD)	iPSC-CVPC	15.1051083677104	2.93696071869273	2.70229091105326e-07	0.00786636884207604
ENST00000592217.2_1	ENSG00000259605.3_8	AC074212.1	Isoform	Heart failure (pre-LVAD)	iPSC-CVPC	-60.7477952983783	5.99118226695037	3.68855545156702e-24	1.07373849195116e-19
ENST00000592694.5_2	ENSG00000167645.17_6	YIF1B	Isoform	Heart failure (pre-LVAD)	iPSC-CVPC	-76.8323671143406	13.0486630232922	3.90563959891266e-09	0.000113693168724348
ENST00000592903.5_5	ENSG00000197256.10_9	KANK2	Isoform	Heart failure (pre-LVAD)	iPSC-CVPC	11.8085981551408	2.26812458277615	1.9261514380797e-07	0.00560702683625001
ENST00000593203.1_1	ENSG00000079805.17_6	DNM2	Isoform	Heart failure (pre-LVAD)	iPSC-CVPC	11.4866818082703	1.620042068269	1.33763379069208e-12	3.89385196470465e-08
ENST00000593466.5_1	ENSG00000130311.11_4	DDA1	Isoform	Heart failure (pre-LVAD)	iPSC-CVPC	-50.382163242807	6.81135851294701	1.39519820308336e-13	4.06142196917566e-09
ENST00000593832.1_1	ENSG00000130309.11_8	COLGALT1	Isoform	Heart failure (pre-LVAD)	iPSC-CVPC	29.1098933132419	4.84230603619325	1.83727742008279e-09	5.348314569861e-05
ENST00000594216.1_1	ENSG00000185236.12_4	RAB11B	Isoform	Heart failure (pre-LVAD)	iPSC-CVPC	16.2817196929268	3.02388751904283	7.27000995289668e-08	0.00211629989728822
ENST00000594469.5_1	ENSG00000228113.7_8	AC003991.1	Isoform	Heart failure (pre-LVAD)	iPSC-CVPC	77.4125895879107	10.4316399583377	1.16290701153569e-13	3.38522231058039e-09
ENST00000594999.1_4	ENSG00000130312.6_4	MRPL34	Isoform	Heart failure (pre-LVAD)	iPSC-CVPC	-104.694397979824	17.0567900824133	8.35723987164923e-10	2.43279252663709e-05
ENST00000595087.5_2	ENSG00000011243.18_7	AKAP8L	Isoform	Heart failure (pre-LVAD)	iPSC-CVPC	16.4596297912433	3.4089423899485	1.37656241334992e-06	0.0400717318526162
ENST00000595357.5_2	ENSG00000090372.15_7	STRN4	Isoform	Heart failure (pre-LVAD)	iPSC-CVPC	-29.9965181829415	4.01380184360004	7.81826657135322e-14	2.27589739892092e-09
ENST00000596184.1_1	ENSG00000204514.10_7	ZNF814	Isoform	Heart failure (pre-LVAD)	iPSC-CVPC	44.2203726227776	3.17224403540138	3.6307576045483e-44	1.05691353868401e-39
ENST00000596409.1_1	ENSG00000167378.8_5	IRGQ	Isoform	Heart failure (pre-LVAD)	iPSC-CVPC	52.9480929832837	11.0282431852148	1.5776824352234e-06	0.0459263356893532
ENST00000596582.1_1	ENSG00000130311.11_4	DDA1	Isoform	Heart failure (pre-LVAD)	iPSC-CVPC	84.1309823366027	10.0736536921284	6.7352537261415e-17	1.96063235967979e-12
ENST00000597451.5_1	ENSG00000221983.8_6	UBA52	Isoform	Heart failure (pre-LVAD)	iPSC-CVPC	44.0172018350965	6.44956661100254	8.80289121346178e-12	2.56252163223872e-07
ENST00000597636.5_2	ENSG00000126456.16_7	IRF3	Isoform	Heart failure (pre-LVAD)	iPSC-CVPC	20.1316517754601	3.91507474644474	2.71704414183085e-07	0.0079093154968696
ENST00000599229.2_2	ENSG00000236404.10_9	VLDLR-AS1	Isoform	Heart failure (pre-LVAD)	iPSC-CVPC	72.4364182769492	9.94573133097123	3.26074123806103e-13	9.49201774399566e-09
ENST00000599439.2_1	ENSG00000233937.7_8	AC008443.1	Isoform	Heart failure (pre-LVAD)	iPSC-CVPC	67.6676836891216	12.3194167960341	3.95685110407576e-08	0.00115183935639645
ENST00000599846.5_1	ENSG00000076928.18_4	ARHGEF1	Isoform	Heart failure (pre-LVAD)	iPSC-CVPC	-57.2143032460218	11.130167331675	2.74050509589506e-07	0.00797761033415052
ENST00000600277.5_1	ENSG00000130304.17_7	SLC27A1	Isoform	Heart failure (pre-LVAD)	iPSC-CVPC	21.4249867850044	3.94467478053898	5.59231652437414e-08	0.00162792334024531
ENST00000600794.1_2	ENSG00000167658.16_5	EEF2	Isoform	Heart failure (pre-LVAD)	iPSC-CVPC	55.7172873589133	6.16991989215706	1.70933286660804e-19	4.975867974696e-15
ENST00000600818.1_1	ENSG00000196235.14_7	SUPT5H	Isoform	Heart failure (pre-LVAD)	iPSC-CVPC	28.9015786212193	5.69126581980664	3.80959660624794e-07	0.0110897357207878
ENST00000600873.5_3	ENSG00000104824.17_8	HNRNPL	Isoform	Heart failure (pre-LVAD)	iPSC-CVPC	-93.6715787348908	10.8083255222781	4.45163345803605e-18	1.29587049963429e-13
ENST00000600972.1_3	ENSG00000130522.6_6	JUND	Isoform	Heart failure (pre-LVAD)	iPSC-CVPC	-83.4170923432786	14.6367602451853	1.20406240529314e-08	0.000350502566180833
ENST00000601449.5_5	ENSG00000104824.17_8	HNRNPL	Isoform	Heart failure (pre-LVAD)	iPSC-CVPC	54.6712747419434	9.03353608177374	1.43027560076236e-09	4.16353227381923e-05
ENST00000602206.1_1	ENSG00000130312.6_4	MRPL34	Isoform	Heart failure (pre-LVAD)	iPSC-CVPC	54.3799349121262	11.2329805920539	1.29125114498272e-06	0.037588320830447
ENST00000602219.1_1	ENSG00000099783.12_8	HNRNPM	Isoform	Heart failure (pre-LVAD)	iPSC-CVPC	2.85086423201176	0.536946928649822	1.09988722414427e-07	0.00320177170948397
ENST00000602503.1_1	ENSG00000004487.17_6	KDM1A	Isoform	Heart failure (pre-LVAD)	iPSC-CVPC	11.9993770717658	1.57386313808185	2.45637400469942e-14	7.15050472768001e-10
ENST00000602657.1_6	ENSG00000213523.10_7	SRA1	Isoform	Heart failure (pre-LVAD)	iPSC-CVPC	20.5772355764123	3.09449788595162	2.93850336022925e-11	8.55398328162735e-07
ENST00000603043.1_2	ENSG00000111665.11_4	CDCA3	Isoform	Heart failure (pre-LVAD)	iPSC-CVPC	52.8456917652044	8.37271491445671	2.76066300411919e-10	8.03629000499096e-06
ENST00000603928.3_3	ENSG00000235106.10_7	BRD3OS	Isoform	Heart failure (pre-LVAD)	iPSC-CVPC	72.7045367211534	8.17348336987727	5.83291245030779e-19	1.6979608142846e-14
ENST00000606865.1_1	ENSG00000170634.13_5	ACYP2	Isoform	Heart failure (pre-LVAD)	iPSC-CVPC	32.1995752272647	4.1258208808497	5.97831359770886e-15	1.74028708829305e-10
ENST00000606927.1_2	ENSG00000140543.14_6	DET1	Isoform	Heart failure (pre-LVAD)	iPSC-CVPC	12.7108556567211	2.32647279277324	4.66643295329329e-08	0.00135839863270368
ENST00000607094.1_1	ENSG00000111817.19_9	DSE	Isoform	Heart failure (pre-LVAD)	iPSC-CVPC	33.3713135805314	3.30283630871381	5.31231115468506e-24	1.54641377712882e-19
ENST00000607252.5_2	ENSG00000171467.16_8	ZNF318	Isoform	Heart failure (pre-LVAD)	iPSC-CVPC	23.0042382193606	4.68786182996817	9.2389564657997e-07	0.0268946022719429
ENST00000608505.3_3	ENSG00000235257.9_10	ITGA9-AS1	Isoform	Heart failure (pre-LVAD)	iPSC-CVPC	61.8566276303843	5.24448386219219	4.16137258770745e-32	1.21137556028164e-27
ENST00000609513.1_1	ENSG00000100058.12_4	CRYBB2P1	Isoform	Heart failure (pre-LVAD)	iPSC-CVPC	11.7033743594999	2.31853293420309	4.47043851802727e-07	0.0130134465259774
ENST00000610402.5_3	ENSG00000006125.18_8	AP2B1	Isoform	Heart failure (pre-LVAD)	iPSC-CVPC	-32.7106191408147	6.169121109332	1.14343750586432e-07	0.00332854657957104
ENST00000611428.5_1	ENSG00000002586.20_7	CD99	Isoform	Heart failure (pre-LVAD)	iPSC-CVPC	-27.3537249837084	5.67633966545231	1.44350378517059e-06	0.0420203951863159
ENST00000612558.4_2	ENSG00000108588.14_8	CCDC47	Isoform	Heart failure (pre-LVAD)	iPSC-CVPC	44.1052472484285	8.07511717673359	4.711427555789e-08	0.00137149656149018
ENST00000612681.4_2	ENSG00000019144.19_9	PHLDB1	Isoform	Heart failure (pre-LVAD)	iPSC-CVPC	5.51215826667431	0.971077135811682	1.37611880533142e-08	0.000400588184231976
ENST00000612753.5_3	ENSG00000100239.16_7	PPP6R2	Isoform	Heart failure (pre-LVAD)	iPSC-CVPC	38.8841163947883	7.03830869711905	3.30163313433002e-08	0.000961105405403469
ENST00000613904.1_2	ENSG00000129696.13_7	TTI2	Isoform	Heart failure (pre-LVAD)	iPSC-CVPC	55.4982141160825	10.1053043148003	3.97433493423997e-08	0.00115692889935726
ENST00000614502.4_2	ENSG00000120913.23_6	PDLIM2	Isoform	Heart failure (pre-LVAD)	iPSC-CVPC	-50.7536074334769	10.0025169678435	3.89367831403641e-07	0.01133449757216
ENST00000615331.5_3	ENSG00000272391.6_7	POM121C	Isoform	Heart failure (pre-LVAD)	iPSC-CVPC	-45.6000318388277	8.3763976113876	5.21348494140459e-08	0.00151764546644288
ENST00000615540.4_2	ENSG00000163110.15_8	PDLIM5	Isoform	Heart failure (pre-LVAD)	iPSC-CVPC	-55.1430543103075	7.94873789974903	3.99566752084353e-12	1.16313881531755e-07
ENST00000615899.1_1	ENSG00000170606.15_5	HSPA4	Isoform	Heart failure (pre-LVAD)	iPSC-CVPC	27.2027737212507	5.66874562263928	1.59675711266966e-06	0.0464815995498138
ENST00000616094.1_1	ENSG00000157613.11_7	CREB3L1	Isoform	Heart failure (pre-LVAD)	iPSC-CVPC	48.9247052763021	5.98561726230863	2.99045814736668e-16	8.70522366698441e-12
ENST00000616261.1_2	ENSG00000134684.10_4	YARS1	Isoform	Heart failure (pre-LVAD)	iPSC-CVPC	36.4001022069301	7.60071168655446	1.67582186004022e-06	0.0487831743457708
ENST00000616406.1_1	ENSG00000108219.15_4	TSPAN14	Isoform	Heart failure (pre-LVAD)	iPSC-CVPC	-46.1833755820505	8.26283926041341	2.28004560147656e-08	0.000663721274589827
ENST00000618156.5_3	ENSG00000184203.8_6	PPP1R2	Isoform	Heart failure (pre-LVAD)	iPSC-CVPC	-97.4613820917305	13.5868112596766	7.32462755738956e-13	2.1321990819561e-08
ENST00000618404.5_5	ENSG00000276409.5_6	CCL14	Isoform	Heart failure (pre-LVAD)	iPSC-CVPC	63.2263413756063	6.81239209727394	1.67772664380165e-20	4.8838622601066e-16
ENST00000618828.1_2	ENSG00000204262.14_7	COL5A2	Isoform	Heart failure (pre-LVAD)	iPSC-CVPC	38.8960405324548	7.0658803533539	3.69652220109054e-08	0.00107605761273746
ENST00000620552.4_1	ENSG00000188157.15_6	AGRN	Isoform	Heart failure (pre-LVAD)	iPSC-CVPC	-33.1581030847214	5.33185973163767	5.00771562691488e-10	1.45774601899492e-05
ENST00000620566.4_2	ENSG00000137497.18_7	NUMA1	Isoform	Heart failure (pre-LVAD)	iPSC-CVPC	-40.278743940156	4.76068696934193	2.65777457374244e-17	7.73678178416424e-13
ENST00000620947.4_3	ENSG00000143384.13_6	MCL1	Isoform	Heart failure (pre-LVAD)	iPSC-CVPC	80.6924661229806	12.7454426356731	2.43444982899862e-10	7.08668345221498e-06
ENST00000621127.4_1	ENSG00000158186.13_5	MRAS	Isoform	Heart failure (pre-LVAD)	iPSC-CVPC	50.120882079582	10.2369900703584	9.7778949149201e-07	0.0284634520973324
ENST00000621158.5_2	ENSG00000157613.11_7	CREB3L1	Isoform	Heart failure (pre-LVAD)	iPSC-CVPC	-69.3623751452392	9.87289124847745	2.1324257571357e-12	6.20749137902202e-08
ENST00000621567.1_2	ENSG00000196683.10_4	TOMM7	Isoform	Heart failure (pre-LVAD)	iPSC-CVPC	124.392054363616	17.798352038584	2.76922051935783e-12	8.06120093185064e-08
ENST00000621663.4_1	ENSG00000166295.9_4	ANAPC16	Isoform	Heart failure (pre-LVAD)	iPSC-CVPC	11.4352418852551	2.23611769952948	3.1560467896147e-07	0.00918725220456839
ENST00000622093.4_1	ENSG00000145147.20_9	SLIT2	Isoform	Heart failure (pre-LVAD)	iPSC-CVPC	69.1523743792907	11.2605171579594	8.1933070941377e-10	2.38507169510348e-05
ENST00000622254.1_1	ENSG00000168175.15_4	MAPK1IP1L	Isoform	Heart failure (pre-LVAD)	iPSC-CVPC	-68.2320870362721	10.0265480807894	1.00949363877043e-11	2.93863598246072e-07
ENST00000623184.1_2	ENSG00000188026.13_7	RILPL1	Isoform	Heart failure (pre-LVAD)	iPSC-CVPC	5.86889898908911	1.13875082007531	2.55254188969305e-07	0.00743044944089647
ENST00000623495.1_1	ENSG00000050426.16_8	LETMD1	Isoform	Heart failure (pre-LVAD)	iPSC-CVPC	5.12417060791964	1.04355766293577	9.09418664095646e-07	0.0264731773118243
ENST00000624666.1_1	ENSG00000124226.11_5	RNF114	Isoform	Heart failure (pre-LVAD)	iPSC-CVPC	11.6362126103248	2.2556622887882	2.48713033155613e-07	0.00724003639515989
ENST00000626055.2_2	ENSG00000197894.11_8	ADH5	Isoform	Heart failure (pre-LVAD)	iPSC-CVPC	56.1472279607118	9.16917682501055	9.15560445385689e-10	2.66519645651774e-05
ENST00000626355.1_2	ENSG00000184007.21_8	PTP4A2	Isoform	Heart failure (pre-LVAD)	iPSC-CVPC	12.4502806338441	2.60118269834193	1.69806059535289e-06	0.0494305439307226
ENST00000627489.1_1	ENSG00000106105.14_5	GARS1	Isoform	Heart failure (pre-LVAD)	iPSC-CVPC	-46.4572628816664	8.7320447042103	1.03585490725685e-07	0.00301537363502469
ENST00000628442.1_3	ENSG00000236540.7_9	AC006547.1	Isoform	Heart failure (pre-LVAD)	iPSC-CVPC	42.7366602424893	5.30959007184144	8.35028252411008e-16	2.43076724276844e-11
ENST00000630728.1_2	ENSG00000227954.7_8	TARID	Isoform	Heart failure (pre-LVAD)	iPSC-CVPC	31.1532549234652	6.375313956284	1.0262117569302e-06	0.0298730242442381
ENST00000632460.1_4	ENSG00000106078.19_7	COBL	Isoform	Heart failure (pre-LVAD)	iPSC-CVPC	19.5902994549109	3.89026751362645	4.76055033777309e-07	0.0138579620332575
ENST00000634963.1_1	ENSG00000165476.14_4	REEP3	Isoform	Heart failure (pre-LVAD)	iPSC-CVPC	69.5677623250279	12.2293023765478	1.28075727097506e-08	0.00037282844158084
ENST00000635305.1_2	ENSG00000073712.15_8	FERMT2	Isoform	Heart failure (pre-LVAD)	iPSC-CVPC	16.9396063947052	1.58261522895125	9.7948657015976e-27	2.85128540573506e-22
ENST00000635540.1_2	ENSG00000067900.8_6	ROCK1	Isoform	Heart failure (pre-LVAD)	iPSC-CVPC	43.4708235177926	8.07541164832442	7.32100535940124e-08	0.0021311446601217
ENST00000635928.1_3	ENSG00000049618.24_7	ARID1B	Isoform	Heart failure (pre-LVAD)	iPSC-CVPC	18.8421008826289	3.28168632434485	9.3791096851347e-09	0.000273025882934271
ENST00000635997.1_2	ENSG00000049759.18_7	NEDD4L	Isoform	Heart failure (pre-LVAD)	iPSC-CVPC	14.6373149884957	2.35319694454702	4.96576229587288e-10	1.4455334043286e-05
ENST00000641102.1_2	ENSG00000109339.24_10	MAPK10	Isoform	Heart failure (pre-LVAD)	iPSC-CVPC	40.2640812614868	6.96125967417704	7.2935262926643e-09	0.000212314550379458
ENST00000642610.2_3	ENSG00000284770.2_6	TBCE	Isoform	Heart failure (pre-LVAD)	iPSC-CVPC	13.4591133558327	2.56635771568835	1.5675628266935e-07	0.00456317538850478
ENST00000642791.1_1	ENSG00000103197.18_6	TSC2	Isoform	Heart failure (pre-LVAD)	iPSC-CVPC	28.519691550346	3.55502202831797	1.03726648812804e-15	3.01948274694073e-11
ENST00000643776.1_3	ENSG00000124733.5_7	MEA1	Isoform	Heart failure (pre-LVAD)	iPSC-CVPC	-47.2471114406529	4.27966791659399	2.45302438214906e-28	7.14075397643591e-24
ENST00000644079.1_1	ENSG00000188153.14_6	COL4A5	Isoform	Heart failure (pre-LVAD)	iPSC-CVPC	11.961125961822	2.11477686816872	1.54963655272924e-08	0.000451099200499482
ENST00000644285.1_2	ENSG00000167522.16_9	ANKRD11	Isoform	Heart failure (pre-LVAD)	iPSC-CVPC	-22.5190974184111	4.22885899765965	1.00897467265234e-07	0.00293712527209096
ENST00000646453.1_1	ENSG00000132849.20_7	PATJ	Isoform	Heart failure (pre-LVAD)	iPSC-CVPC	57.427907598326	5.02440992500949	2.96854857525926e-30	8.64144490257971e-26
ENST00000648167.1_1	ENSG00000166033.13_5	HTRA1	Isoform	Heart failure (pre-LVAD)	iPSC-CVPC	-47.8718868636744	9.60785770940567	6.27431445348644e-07	0.018264529374099
ENST00000648844.2_3	ENSG00000153207.16_6	AHCTF1	Isoform	Heart failure (pre-LVAD)	iPSC-CVPC	-97.6519782440482	19.6742035592045	6.92509219683275e-07	0.0201589433849801
ENST00000649091.1_1	ENSG00000255529.9_8	POLR2M	Isoform	Heart failure (pre-LVAD)	iPSC-CVPC	-154.094569899944	27.2976596080434	1.65206524808233e-08	0.000480916193716766
ENST00000651452.1_2	ENSG00000197616.12_5	MYH6	Isoform	Heart failure (pre-LVAD)	iPSC-CVPC	20.7737201737729	4.01301514278851	2.25982255129497e-07	0.00657834344681966
ENST00000651648.1_2	ENSG00000125952.20_8	MAX	Isoform	Heart failure (pre-LVAD)	iPSC-CVPC	11.0277873142124	1.4277921230067	1.13032124503586e-14	3.29036514429939e-10
ENST00000652107.1_1	ENSG00000116062.17_8	MSH6	Isoform	Heart failure (pre-LVAD)	iPSC-CVPC	45.820656040704	5.59482864040963	2.61610719200697e-16	7.61548803593229e-12
ENST00000652689.1_3	ENSG00000124795.17_8	DEK	Isoform	Heart failure (pre-LVAD)	iPSC-CVPC	-85.4331920734357	14.7843506184747	7.53143667570384e-09	0.000219240121629739
ENST00000658331.1_1	ENSG00000283103.3_2	AC010642.2	Isoform	Heart failure (pre-LVAD)	iPSC-CVPC	27.1272133046458	4.3411549015721	4.13493398685241e-10	1.20367928357274e-05
ENST00000659705.1_1	ENSG00000163681.16_6	SLMAP	Isoform	Heart failure (pre-LVAD)	iPSC-CVPC	-30.4194856186473	6.33509850648442	1.57294115155246e-06	0.0457883169216921
ENST00000660374.1_1	ENSG00000223960.7_9	CHROMR	Isoform	Heart failure (pre-LVAD)	iPSC-CVPC	44.954266004806	5.31786944099009	2.82854364412995e-17	8.23389054806228e-13
ENST00000663398.1_3	ENSG00000203993.6_9	ARRDC1-AS1	Isoform	Heart failure (pre-LVAD)	iPSC-CVPC	30.7523026088467	5.36836892649613	1.01366923096769e-08	0.000295079113134695
ENST00000664481.1_1	ENSG00000283103.3_2	AC010642.2	Isoform	Heart failure (pre-LVAD)	iPSC-CVPC	13.905204954962	2.27701293984568	1.01664604647776e-09	2.95945664129676e-05
ENST00000667017.1_1	ENSG00000255857.6_7	PXN-AS1	Isoform	Heart failure (pre-LVAD)	iPSC-CVPC	75.9458394722723	6.87793957033721	2.39782170075222e-28	6.98005897088971e-24
ENST00000669440.1_1	ENSG00000283103.3_2	AC010642.2	Isoform	Heart failure (pre-LVAD)	iPSC-CVPC	-45.8967609405731	9.00192161182609	3.42262418944682e-07	0.00996325901547969
ENST00000671102.1_2	ENSG00000108641.18_10	B9D1	Isoform	Heart failure (pre-LVAD)	iPSC-CVPC	28.644606983973	4.0251313235249	1.10750070168764e-12	3.22393454261272e-08
ENST00000671267.1_1	ENSG00000229980.5_6	TOB1-AS1	Isoform	Heart failure (pre-LVAD)	iPSC-CVPC	51.1768036523568	8.5266141345432	1.94892461786973e-09	5.67331956261879e-05
ENST00000673001.1_1	ENSG00000100478.15_8	AP4S1	Isoform	Heart failure (pre-LVAD)	iPSC-CVPC	24.5560568812578	4.972911241484	7.89423947255891e-07	0.022980131104619
	ENSG00000000419.12_6	DPM1	Gene	Heart failure (pre-LVAD)	Healthy heart (GTEx)	1.9872751259181	0.360876089050732	3.65399598175111e-08	0.000740701525460768
	ENSG00000001631.15_9	KRIT1	Gene	Heart failure (pre-LVAD)	Healthy heart (GTEx)	1.99529148627081	0.398949141160952	5.6924922663174e-07	0.011539251073052
	ENSG00000003393.15_8	ALS2	Gene	Heart failure (pre-LVAD)	Healthy heart (GTEx)	0.807681904083801	0.162407698519997	6.58651566867009e-07	0.0133515259119611
	ENSG00000004700.16_8	RECQL	Gene	Heart failure (pre-LVAD)	Healthy heart (GTEx)	1.32729426190714	0.271203043295017	9.87576393282129e-07	0.020019161068222
	ENSG00000005175.10_6	RPAP3	Gene	Heart failure (pre-LVAD)	Healthy heart (GTEx)	1.18935795093694	0.230064888126998	2.34516448064857e-07	0.00475388291872272
	ENSG00000005249.13_4	PRKAR2B	Gene	Heart failure (pre-LVAD)	Healthy heart (GTEx)	1.35068934551593	0.240512888484944	1.9557458227916e-08	0.000396449235738085
	ENSG00000005483.21_8	KMT2E	Gene	Heart failure (pre-LVAD)	Healthy heart (GTEx)	1.64542529149063	0.287943371538732	1.10087967319594e-08	0.000223159318553549
	ENSG00000005893.16_5	LAMP2	Gene	Heart failure (pre-LVAD)	Healthy heart (GTEx)	1.68117266995855	0.338139941804482	6.63255081743168e-07	0.0134448437620158
	ENSG00000006468.14_7	ETV1	Gene	Heart failure (pre-LVAD)	Healthy heart (GTEx)	1.14424699523788	0.173282196645007	4.01906353425216e-11	8.14704369028256e-07
	ENSG00000006715.16_6	VPS41	Gene	Heart failure (pre-LVAD)	Healthy heart (GTEx)	1.65525326534663	0.300668365444714	3.68653479252947e-08	0.000747297467793649
	ENSG00000007168.13_5	PAFAH1B1	Gene	Heart failure (pre-LVAD)	Healthy heart (GTEx)	1.45033894263234	0.291490481839701	6.50471094974168e-07	0.0131856995662214
	ENSG00000008838.20_7	MED24	Gene	Heart failure (pre-LVAD)	Healthy heart (GTEx)	-2.11220130026582	0.345270874651537	9.50431478100894e-10	1.92661964925832e-05
	ENSG00000009307.16_9	CSDE1	Gene	Heart failure (pre-LVAD)	Healthy heart (GTEx)	1.56446098289974	0.310668664679377	4.75891429909908e-07	0.00964679517570375
	ENSG00000009844.16_5	VTA1	Gene	Heart failure (pre-LVAD)	Healthy heart (GTEx)	1.22646078078243	0.246355147163175	6.41035627586568e-07	0.0129944332068073
	ENSG00000009954.11_5	BAZ1B	Gene	Heart failure (pre-LVAD)	Healthy heart (GTEx)	1.54331906759253	0.299766305352528	2.62707407766423e-07	0.00532534186283316
	ENSG00000010404.18_6	IDS	Gene	Heart failure (pre-LVAD)	Healthy heart (GTEx)	1.05548366078304	0.178547202405705	3.38984662979776e-09	6.87155810326304e-05
	ENSG00000010539.11_7	ZNF200	Gene	Heart failure (pre-LVAD)	Healthy heart (GTEx)	1.24555875220918	0.262079466756027	2.00817851706525e-06	0.0407077867194297
	ENSG00000011105.14_6	TSPAN9	Gene	Heart failure (pre-LVAD)	Healthy heart (GTEx)	1.54481827146594	0.223965443437209	5.28980039245843e-12	1.07229543755525e-07
	ENSG00000011454.17_5	RABGAP1	Gene	Heart failure (pre-LVAD)	Healthy heart (GTEx)	1.82833056005595	0.258652565455096	1.56421586032295e-12	3.17082197046065e-08
	ENSG00000011465.17_7	DCN	Gene	Heart failure (pre-LVAD)	Healthy heart (GTEx)	1.06275707976436	0.210510758866484	4.45364283288451e-07	0.00902797938654019
	ENSG00000012061.16_8	ERCC1	Gene	Heart failure (pre-LVAD)	Healthy heart (GTEx)	-1.73470406028797	0.300318840431115	7.64029582066218e-09	0.000154876436580643
	ENSG00000012124.17_5	CD22	Gene	Heart failure (pre-LVAD)	Healthy heart (GTEx)	-1.9318923337139	0.408111451724284	2.20423163110876e-06	0.0446819793942057
	ENSG00000012174.12_5	MBTPS2	Gene	Heart failure (pre-LVAD)	Healthy heart (GTEx)	1.4119019704801	0.291528981057233	1.27833411528615e-06	0.0259131108509656
	ENSG00000013374.16_7	NUB1	Gene	Heart failure (pre-LVAD)	Healthy heart (GTEx)	1.85769824185916	0.325017689160878	1.09263942660864e-08	0.000221488938167837
	ENSG00000013561.18_8	RNF14	Gene	Heart failure (pre-LVAD)	Healthy heart (GTEx)	2.14441873962455	0.362720206420654	3.37883042710737e-09	6.84922715878935e-05
	ENSG00000014123.10_4	UFL1	Gene	Heart failure (pre-LVAD)	Healthy heart (GTEx)	2.8481450295998	0.343733318512265	1.1720455770803e-16	2.37585358929948e-12
	ENSG00000014824.14_5	SLC30A9	Gene	Heart failure (pre-LVAD)	Healthy heart (GTEx)	1.6859343908098	0.244545218466979	5.41831901869962e-12	1.0983474482806e-07
	ENSG00000015153.14_5	YAF2	Gene	Heart failure (pre-LVAD)	Healthy heart (GTEx)	1.19767360380428	0.223046434591656	7.89046670852295e-08	0.00159947650648469
	ENSG00000015171.19_4	ZMYND11	Gene	Heart failure (pre-LVAD)	Healthy heart (GTEx)	2.71117618403104	0.29850443159708	1.06077457529101e-19	2.15029614157241e-15
	ENSG00000015479.19_8	MATR3	Gene	Heart failure (pre-LVAD)	Healthy heart (GTEx)	1.35327410876257	0.271904044945593	6.45679063399343e-07	0.0130885602941681
	ENSG00000016391.11_7	CHDH	Gene	Heart failure (pre-LVAD)	Healthy heart (GTEx)	-1.48648201573109	0.287485157430557	2.33294653934806e-07	0.00472911592991245
	ENSG00000017797.13_5	RALBP1	Gene	Heart failure (pre-LVAD)	Healthy heart (GTEx)	1.81709730285213	0.385483236836622	2.43119433059404e-06	0.0492827402754718
	ENSG00000018236.15_7	CNTN1	Gene	Heart failure (pre-LVAD)	Healthy heart (GTEx)	-1.3609202778903	0.263680705816883	2.45315097010293e-07	0.00497278233149565
	ENSG00000018610.15_5	CXorf56	Gene	Heart failure (pre-LVAD)	Healthy heart (GTEx)	2.1134858885823	0.337998157665597	4.02768761934237e-10	8.16452557316892e-06
	ENSG00000020426.11_5	MNAT1	Gene	Heart failure (pre-LVAD)	Healthy heart (GTEx)	1.4843237505223	0.280124064039786	1.16560852376723e-07	0.00236280503852855
	ENSG00000020577.14_5	SAMD4A	Gene	Heart failure (pre-LVAD)	Healthy heart (GTEx)	1.06126274504996	0.219999126060738	1.40749257433772e-06	0.0285312819743999
	ENSG00000022267.19_9	FHL1	Gene	Heart failure (pre-LVAD)	Healthy heart (GTEx)	1.49317524625777	0.283289327676741	1.35794214926778e-07	0.00275268453078072
	ENSG00000022840.16_7	RNF10	Gene	Heart failure (pre-LVAD)	Healthy heart (GTEx)	-2.21907608456714	0.235122359484344	3.80097220444963e-21	7.70495075563984e-17
	ENSG00000023228.14_7	NDUFS1	Gene	Heart failure (pre-LVAD)	Healthy heart (GTEx)	0.894558836704787	0.161825403658564	3.24038892539569e-08	0.00065685923906696
	ENSG00000025770.19_6	NCAPH2	Gene	Heart failure (pre-LVAD)	Healthy heart (GTEx)	-1.94268247456861	0.405664578175229	1.67707541760535e-06	0.0339959957902781
	ENSG00000028203.18_5	VEZT	Gene	Heart failure (pre-LVAD)	Healthy heart (GTEx)	2.05252922147655	0.249167255671911	1.75764063361787e-16	3.56291332840678e-12
	ENSG00000029725.17_7	RABEP1	Gene	Heart failure (pre-LVAD)	Healthy heart (GTEx)	1.55267688863396	0.299027856682445	2.07583053583375e-07	0.0042079160791886
	ENSG00000037749.12_5	MFAP3	Gene	Heart failure (pre-LVAD)	Healthy heart (GTEx)	1.45879354234542	0.297001425214794	9.02720733086488e-07	0.0182990519803962
	ENSG00000039068.19_7	CDH1	Gene	Heart failure (pre-LVAD)	Healthy heart (GTEx)	-2.23399257520686	0.32693163400691	8.30351484965375e-12	1.68320549517331e-07
	ENSG00000039650.12_7	PNKP	Gene	Heart failure (pre-LVAD)	Healthy heart (GTEx)	-2.03885445373034	0.309031866722266	4.17996234754044e-11	8.47320167469923e-07
	ENSG00000040341.18_9	STAU2	Gene	Heart failure (pre-LVAD)	Healthy heart (GTEx)	1.01565706210529	0.193607827718475	1.55478726370091e-07	0.00315170926224811
	ENSG00000042832.12_4	TG	Gene	Heart failure (pre-LVAD)	Healthy heart (GTEx)	-4.43858712686313	0.351568740898257	1.53565047515293e-36	3.11291707818251e-32
	ENSG00000043143.20_4	JADE2	Gene	Heart failure (pre-LVAD)	Healthy heart (GTEx)	1.50206820966434	0.277320641093382	6.08248422787669e-08	0.00123298037783288
	ENSG00000044459.15_5	CNTLN	Gene	Heart failure (pre-LVAD)	Healthy heart (GTEx)	1.23488087339994	0.252282795486753	9.83917802371217e-07	0.0199449977718669
	ENSG00000044524.11_4	EPHA3	Gene	Heart failure (pre-LVAD)	Healthy heart (GTEx)	1.45032177044634	0.275177566035497	1.36056912898698e-07	0.00275800968136951
	ENSG00000046653.15_6	GPM6B	Gene	Heart failure (pre-LVAD)	Healthy heart (GTEx)	-1.55263381796796	0.313060882280804	7.06651196777529e-07	0.0143245264098773
	ENSG00000047578.13_8	KIAA0556	Gene	Heart failure (pre-LVAD)	Healthy heart (GTEx)	2.12862711767222	0.416247639701175	3.15661564168408e-07	0.0063987755672578
[truncated: 8,173 more rows]
